# Supplementary material
Source: publisher figshare collection journal article supplement (https://gsapubs.figshare.com/articles/dataset/_/18863777)
Supplement: Supplementary file 1 [file 2]

## Sheet: Summary
Sample_ID	Unit	Age	Latitude (°N)	Longitude (°E)
18COA-1	upper Tarheel fm	Miocene	43.368	-124.296
18COA-2	lower Empire Fm	Mio-Plio	43.3611	-124.305
18COA-3	upper Empire Fm	Mio-Plio	43.3399	-124.318
18COA-4	top of Lower Mbr, Coaledo Fm	Eocene	43.3359	-124.373
18COA-5	top of Upper Mbr, Coaledo Fm	Eocene	43.342	-124.358
18COA-6	Empire tuff	Miocene	43.3497	-124.338
18COA-7	base of Tunnel Point Sandstone	Oligocene	43.3454	-124.346
18COA-9	lower Bastendorff Shale	Eocene	43.3411	-124.353
18COA-12	middle beds of Sacchi Beach	Eocene	43.2482	-124.389
18COA-13	base of Lower Mbr, Coaledo Fm	Eocene	43.3141	-124.395
19COA-1	middle of Middle Mbr, Coaledo Fm	Eocene	43.3388	-124.368
19COA-2	middle of Middle Mbr, Coaledo Fm	Eocene	43.3391	-124.367
19COA-4	top of Tunnel Point Sandstone	Oligocene	43.3455	-124.344
19COA-5	lower Empire Fm	Mio-Plio	43.3665	-124.297
19COA-6	base of Empire Fm	Mio-Plio	43.367	-124.297
19COA-7	middle Tarheel fm	Miocen	43.3832	-124.301
19COA-8	Coos Conglomerate, Empire Fm	Mio-Plio	43.353	-124.315
20COA-1	North Umpqua River	Holocene	43.3329	-123.006
20COA-2	Upper Rogue River	Holocene	42.5927	-122.822
20COA-14	upper Tyee Fm	Eocene	43.3779	-124.13
20COA-19	middle of Lower Mbr, Coaledo Fm	Eocene	43.3228	-124.387
20COA-21	middle of Middle Mbr, Coaledo Fm	Eocene	43.3394	-124.366
20COA-22	base of Upper Mbr, Coaledo Fm	Eocene	43.3408	-124.363
20COA-24	Middle Fork of Willamette River	Holocene	44.0225	-122.95
20COA-25	top of Tarheel fm	Miocene	43.3672	-124.297

## Sheet: 18COA-1
Aliquot Name	18COA-1
Stratigraphic Formation Name	middle Tarheel fm
Stratigraphic Age	Miocene
Rock Type	silty sandstone
Mineral	Zircon
Method	U-Pb
Latitude	43.368
Longitude	-124.296
Internal Uncertainty Level	one sigma
External Uncertainty 206/238 (% two sigma)	1.11503
External Uncertainty 206/207 (% two sigma)	0.817373
Analysis Purpose	DZ
Laboratory Name	Arizona LaserChron Center
Analyst Name	M. Darin
Aliquot Reference
Aliquot Instrumental Method	LA-ICPMS
Aliquot Instrumental Reference	Gehrels, G.E., Valencia, V., Ruiz, J., 2008, Enhanced precision, accuracy, efficiency, and spatial resolution of U-Pb ages by laser ablation-multicollector-inductively coupled plasma-mass spectrometry: Geochemistry, Geophysics, Geosystems, v. 9, Q03017, doi:10.1029/2007GC001805.
	Gehrels, G. and Pecha, M., 2014, Detrital zircon U-Pb geochronology and Hf isotope geochemistry of Paleozoic and Triassic passive margin strata of western North America: Geosphere, v. 10 (1), p. 49-65.
								Isotope ratios						Apparent ages (Ma)				Best Age
Analysis	U	eU	206Pb	U/Th	206Pb*	±	207Pb*	±	206Pb*	±	error	206Pb*	±	207Pb*	±	206Pb*	±	Concordia Age	±1σ	within 10% of YSCG (*)	Discordance (dc)	Concordance	Age Class	Notes
	(ppm)	(ppm)	204Pb		207Pb*	(%)	235U	(%)	238U	(%)	corr.	238U	(Ma)	235U	(Ma)	207Pb*	(Ma)	(Ma)	(Ma)		(%)
Run1-Spot 213	386.222	421.75	3235.73	2.55465	20.6779	3.87809	0.0226557	4.98487	0.00374613	1.32221	0.265244	24.104	0.31811	22.7475	1.12133	NA	NA	24.096	0.318	YSCG	-5.86	rev discord.	Y	YSCG
Run1-Spot 180	1005.7	1098.92	121436	2.53527	21.3162	1.52544	0.0284408	2.00654	0.0044082	1.30318	0.649467	28.3546	0.3687	28.4753	0.56343	38.6461	36.5109	28.355	0.369		0.431	concordant	P	high eU
Run1-Spot 134	1677.33	2004.68	32801.9	1.20414	20.3099	1.51167	0.0424714	1.814	0.00630682	0.999531	0.551011	40.5287	0.403826	42.2341	0.750411	140.23	35.5441	40.511	0.404		4.21	discord.	P	high eU
Run1-Spot 14	321.218	347.31	6117.78	2.89308	20.6436	2.9452	0.0410147	3.34416	0.00647769	1.03253	0.308756	41.6232	0.428389	40.8142	1.33783	NA	NA	41.62	0.428		-2	rev discord.	S
Run2-Spot 39	143.59	159.827	4154.63	2.07818	18.2602	3.35464	0.046277	3.96924	0.00656033	1.4563	0.366895	42.1525	0.611863	45.934	1.78261	248.065	85.0482	42.115	0.612		8.78	discord.	S
Run1-Spot 13	796.221	1019.03	34778.7	0.839802	20.9673	2.13592	0.0430151	2.50206	0.00661483	1.25431	0.501314	42.5015	0.531349	42.7635	1.04775	57.4653	51.6355	42.503	0.531		0.628	concordant	P	high eU
Run1-Spot 309	309.564	347.393	3887.44	1.92308	19.386	2.86228	0.0452118	3.13464	0.00684419	1.21789	0.388527	43.9702	0.533688	44.8998	1.37678	94.8584	68.4025	43.97	0.534		2.14	concordant	S	YC2σ
Run1-Spot 18	179.408	189.866	3464.45	4.03149	18.0157	4.00137	0.0490977	4.28386	0.0069614	1.47663	0.344696	44.7206	0.658072	48.6678	2.03569	247.685	92.6026	44.688	0.658		8.66	discord.	S	YC2σ
Run1-Spot 61	391.754	429.822	3116.68	2.41835	20.8173	2.2082	0.0419707	4.95534	0.00702515	1.01419	0.204665	45.1287	0.45609	41.7463	2.02673	NA	NA	45.112	0.456		-7.96	rev discord.	S	YC2σ
Run2-Spot 78	362.971	424.257	14708.3	1.39181	21.2255	2.68418	0.0447179	2.82859	0.0070429	0.882792	0.312096	45.2423	0.397998	44.4199	1.22937	0.250422	NA	45.239	0.398		-1.88	rev discord.	S	YC2σ
Run1-Spot 98	603.085	650.576	13814.8	2.98428	20.7477	2.40484	0.0458659	2.79235	0.00705978	1.36443	0.488631	45.3503	0.616601	45.535	1.24341	55.2946	NA	45.351	0.617		0.415	concordant	S	YC2σ
Run1-Spot 189	1454.19	1740.64	23675.9	1.19299	20.8617	1.47489	0.0463467	1.95027	0.00709754	1.09224	0.560047	45.5921	0.496219	46.0016	0.877136	67.4284	38.4326	45.594	0.496		0.915	concordant	P	high eU
Run2-Spot 62	1122.83	1208.98	360503	3.06282	20.9183	1.52732	0.0467911	2.08784	0.00711458	1.4235	0.681806	45.7011	0.648257	46.4329	0.947613	84.3633	36.2244	45.703	0.648		1.62	concordant	P	high eU
Run1-Spot 235	755.494	898.413	12009	1.24225	20.1741	1.62024	0.0478528	2.02707	0.00716129	1.15421	0.569399	46.0001	0.529047	47.4621	0.93995	121.936	39.2738	45.991	0.529		3.2	concordant	S	YC2σ
Run1-Spot 73	2132.83	2531.62	22580.4	1.25686	21.0774	1.04617	0.0463913	1.80491	0.00718673	1.46866	0.813704	46.1629	0.675557	46.045	0.812511	39.9309	25.119	46.158	0.675		-0.262	concordant	P	high eU
Run2-Spot 17	229.219	252.403	3823.44	2.32348	20.172	2.52045	0.0460291	2.9887	0.00732905	0.975313	0.326333	47.0738	0.457445	45.6934	1.33537	NA	NA	47.065	0.457		-3.04	rev discord.	S
Run1-Spot 312	489.57	570.682	231719	1.41838	20.9529	1.66811	0.0485636	1.95133	0.00736859	1.01247	0.518861	47.3268	0.477416	48.1507	0.91765	89.3892	39.5634	47.327	0.477		1.77	concordant	S
Run1-Spot 152	1674.29	1831.28	62672	2.50632	21.0853	1.45275	0.0483056	1.8483	0.00740985	1.13115	0.611997	47.5908	0.536343	47.9009	0.864792	63.4678	34.8043	47.593	0.536		0.665	concordant	P	high eU
Run1-Spot 302	386.703	467.342	4860.69	1.12693	20.5496	3.03083	0.0467721	3.34848	0.00741696	1.27688	0.381333	47.6364	0.606019	46.4144	1.51919	NA	NA	47.626	0.606		-2.66	rev discord.	S
Run1-Spot 17	260.866	309.106	8829.31	1.27079	20.0055	3.27392	0.0493429	3.53152	0.00742318	1.29382	0.366364	47.6762	0.614569	48.9051	1.68616	109.572	77.5985	47.675	0.615		2.61	concordant	S
Run1-Spot 76	371.028	439.342	20865.1	1.27634	20.7708	2.08618	0.0487321	2.31727	0.00743878	0.989697	0.427096	47.776	0.47109	48.3138	1.09334	75.0853	49.7904	47.777	0.471		1.15	concordant	S
Run1-Spot 70	829.397	917.326	10561.2	2.21666	20.5591	1.56387	0.0487621	2.05498	0.0074691	1.31883	0.64177	47.97	0.630293	48.3429	0.97016	66.8543	37.5099	47.973	0.63		0.793	concordant	S
Run1-Spot 99	1386.13	1457.06	34229.6	4.59218	21.0962	1.48458	0.0484739	1.99853	0.00748636	1.32875	0.664862	48.0804	0.63649	48.0638	0.93819	47.2149	35.6467	48.08	0.636		-0.0353	concordant	P	high eU
Run1-Spot 36	1021.63	1235.22	98603.6	1.12402	19.7125	2.02896	0.0526636	2.4395	0.00756783	1.35393	0.555006	48.6017	0.655561	52.1132	1.23923	216.721	46.9994	48.527	0.656		7.16	discord.	P	high eU
Run2-Spot 46	336.977	373.941	6069.32	2.14237	19.2659	2.28084	0.0519378	2.56266	0.00762694	1.11819	0.43634	48.9799	0.545613	51.4129	1.28474	166.325	53.8946	48.964	0.546		4.97	discord.	S
Run1-Spot 126	377.698	433.227	43249.4	1.59843	18.0007	2.58916	0.0583841	2.90153	0.00766934	1.3096	0.451347	49.2512	0.642533	57.6162	1.6252	420.804	57.8115	49.007	0.642		16.1	discord.	D	does not overlap concordia within 2σ
Run1-Spot 34	223.328	257.54	24153.1	1.53401	19.7358	3.20926	0.0529776	3.41805	0.00768193	1.175	0.343764	49.3317	0.577437	52.4161	1.74615	195.821	74.6011	49.315	0.577		6.22	discord.	S
Run1-Spot 82	323.795	356.329	10312.5	2.33886	18.447	2.78219	0.0562626	3.05882	0.00771018	1.25034	0.408764	49.5124	0.616701	55.5788	1.65437	325.529	63.3653	49.409	0.616		11.9	discord.	D	does not overlap concordia within 2σ
Run2-Spot 98	319.333	359.245	3242.21	1.88024	18.8617	2.29428	0.0517791	5.28216	0.00775628	0.979662	0.185466	49.8073	0.486063	51.2597	2.64042	119.689	122.398	49.807	0.486		2.95	concordant	S
Run2-Spot 27	838.897	971.071	18006.1	1.49152	19.8804	1.23001	0.053219	1.71581	0.00782302	1.18613	0.691293	50.2342	0.593526	52.6488	0.880334	163.951	29.006	50.176	0.594		4.82	discord.	D	does not overlap concordia within 2σ
Run1-Spot 174	655.91	939.512	14193.6	0.543504	20.846	1.57312	0.0505652	1.83857	0.00781672	0.799885	0.435057	50.1939	0.399934	50.0872	0.898546	44.9607	39.5675	50.193	0.4		-0.218	concordant	S
Run2-Spot 104	860.561	993.76	342947	1.51827	20.901	1.51939	0.0515257	2.10851	0.00782015	1.46191	0.693338	50.2159	0.731258	51.015	1.04908	88.7472	36.0034	50.219	0.731		1.62	concordant	S
Run1-Spot 1	1713.79	1843.73	45913.3	3.09931	21.1692	1.49588	0.0506302	1.84428	0.00783047	1.07603	0.583441	50.2819	0.538942	50.1499	0.902435	43.8235	35.8085	50.28	0.539		-0.269	concordant	P	high eU
Run2-Spot 33	85.7669	95.6774	4030.7	2.03372	18.4659	4.03106	0.0543942	5.18867	0.00783635	1.40388	0.270566	50.3194	0.703673	53.7812	2.71792	210.869	115.813	50.307	0.704		6.83	discord.	S
Run1-Spot 208	1132.56	1199.03	19682.8	4.00446	21.0044	1.4847	0.0512814	2.73486	0.00792029	2.15231	0.786989	50.8564	1.09028	50.7791	1.35459	47.1551	40.3272	50.853	1.09		-0.156	concordant	P	high eU
Run2-Spot 73	276.144	315.19	8252.23	1.662	19.7403	2.68533	0.0533774	2.85578	0.00793163	0.932317	0.326467	50.9288	0.472948	52.8015	1.46936	138.641	63.4268	50.925	0.473		3.7	discord.
Run2-Spot 2	601.158	676.189	73271.3	1.88284	20.8168	1.71679	0.0522844	2.16745	0.0079526	1.3201	0.609056	51.063	0.671419	51.7474	1.0935	83.5366	40.7807	51.066	0.672		1.37	concordant
Run1-Spot 49	401.948	482.463	185674	1.17317	21.8509	2.44588	0.0501275	2.74511	0.00796305	1.2461	0.453934	51.1298	0.634608	49.664	1.33053	NA	NA	51.109	0.634		-2.98	rev discord.
Run2-Spot 8	248.659	304.81	29545.3	1.04067	19.0749	2.92657	0.0569652	3.20673	0.00797584	1.3093	0.408299	51.2116	0.667859	56.254	1.75486	276.626	67.0566	51.144	0.668		9.65	discord.
Run1-Spot 119	661.276	804.293	84154.4	1.08658	20.2957	1.8334	0.0540135	2.04383	0.00797423	0.902729	0.441686	51.2013	0.460378	53.4144	1.06348	153.828	42.9617	51.19	0.46		4.34	discord.
Run1-Spot 276	2997.24	3174.95	486353	3.96348	21.2032	0.969045	0.0528	1.54346	0.00811114	1.20134	0.778338	52.0769	0.623098	52.2448	0.785985	59.9479	23.096	52.082	0.623		0.33	concordant
Run2-Spot 10	656.674	721.227	66683.2	2.39055	20.8106	1.69597	0.0534382	2.08533	0.0081269	1.21288	0.581626	52.1776	0.630298	52.8601	1.07411	83.8872	40.2372	52.18	0.63		1.33	concordant
Run1-Spot 24	1191.28	1273.97	97723.5	3.38563	21.1362	1.34645	0.0532811	1.84407	0.00821358	1.25994	0.68324	52.7319	0.661681	52.7086	0.947187	51.6543	32.1337	52.731	0.662		-0.0452	concordant
Run1-Spot 301	779.168	880.205	9705.7	1.81224	12.7443	7.74956	0.088665	8.02866	0.00832947	1.97121	0.245522	53.4728	1.0497	86.259	6.63953	1126.42	155.309	52.975	1.045		49.5	discord.
Run2-Spot 13	812.24	910.788	423765	1.93689	20.6788	1.2588	0.0554192	1.77616	0.00834952	1.25305	0.705483	53.601	0.668862	54.7677	0.946992	106.083	29.744	53.601	0.669		2.21	concordant
Run1-Spot 154	175.478	195.588	8491.68	2.05061	19.8112	3.54222	0.0569073	3.86116	0.0084342	1.49146	0.386272	54.1423	0.804127	56.1984	2.11096	144.713	83.5621	54.137	0.804		3.83	discord.
Run1-Spot 211	1100.51	1251.47	40615	1.71313	21.3259	1.51535	0.0600686	1.98952	0.00935096	1.28659	0.646685	60	0.768374	59.2309	1.1447	28.2508	NA	59.978	0.768		-1.33	concordant
Run2-Spot 24	312.815	318.851	6858.56	12.1801	20.6037	1.54886	0.0598729	2.13278	0.00939011	1.40365	0.658134	60.2501	0.841764	59.0435	1.22336	10.3607	NA	60.205	0.841		-2.08	rev discord.		high U/Th
Run1-Spot 212	1056.02	1167.9	16687.1	2.21811	20.6483	1.42475	0.0620135	1.83875	0.00944704	1.15711	0.629289	60.6137	0.698078	61.0922	1.09021	79.8601	33.932	60.619	0.698		0.81	concordant
Run2-Spot 84	410.815	438.515	8316.05	3.48516	20.9394	2.00818	0.0615254	2.61675	0.00971294	1.071	0.409287	62.3115	0.664143	60.6255	1.53999	NA	NA	62.292	0.664		-2.83	rev discord.
Run1-Spot 239	824.356	922.622	195290	1.97142	21.2956	1.334	0.0630025	1.83146	0.00972428	1.25475	0.685108	62.3839	0.778987	62.0373	1.10218	48.6608	31.8647	62.374	0.779		-0.574	concordant
Run1-Spot 112	957.81	1054.3	27822	2.33265	21.3467	1.8215	0.0629307	2.28765	0.00984123	1.38304	0.604566	63.1305	0.868856	61.9687	1.37524	17.2916	NA	63.098	0.868		-1.91	rev discord.
Run2-Spot 12	1375.4	1427.6	59276.9	6.19243	20.5668	1.01722	0.0678574	1.39117	0.0102131	0.947643	0.681182	65.5037	0.617598	66.6642	0.897626	108.534	24.0547	65.513	0.618		1.81	concordant
Run1-Spot 60	365.894	409.441	14132.6	1.97457	20.5643	2.35423	0.0682932	2.67364	0.0103943	1.19876	0.448362	66.66	0.794975	67.0785	1.73548	82.0107	56.7352	66.662	0.795		0.647	concordant
Run1-Spot 122	412.896	550.659	8221.82	0.704327	19.8476	1.68064	0.0701464	2.7124	0.0104696	1.57064	0.57906	67.1407	1.04907	68.8384	1.80528	128.26	52.0414	67.142	1.049		2.58	concordant
Run2-Spot 34	207.539	222.098	12858.5	3.34979	20.8747	2.15284	0.0674718	2.49023	0.0104944	1.24525	0.500053	67.2988	0.833677	66.2974	1.59822	30.2937	NA	67.283	0.833		-1.55	concordant
Run1-Spot 79	890.31	919.258	70243.6	7.22739	21.0494	1.43154	0.0696426	2.07738	0.0106561	1.50448	0.724217	68.3304	1.02259	68.3602	1.37335	69.4247	34.0995	68.331	1.022		0.045	concordant
Run1-Spot 245	774.163	780.766	28508.1	27.5539	20.6285	1.77321	0.0710146	2.2288	0.0107057	1.32904	0.596301	68.6468	0.907501	69.6618	1.50056	104.641	42.2962	68.654	0.908		1.52	concordant		high U/Th
Run2-Spot 99	307.519	350.467	64407	1.68265	20.1035	2.6444	0.0740961	2.89485	0.0108648	1.17774	0.40684	69.661	0.816011	72.5791	2.02773	169.78	61.7387	69.653	0.816		4.25	discord.
Run1-Spot 46	223.86	263.043	9766.85	1.34258	21.0269	2.47733	0.0700748	2.73689	0.0110503	1.14853	0.419646	70.8443	0.80921	68.7704	1.81985	NA	NA	70.815	0.809		-3.07	rev discord.
Run1-Spot 262	234.088	270.991	16587.1	1.49069	18.6927	3.7212	0.0805848	3.91222	0.0110946	1.19613	0.305743	71.1264	0.84609	78.6946	2.96243	315.006	84.7491	71.073	0.846		10.5	discord.
Run1-Spot 58	102.418	114.186	4435.48	2.0452	18.275	3.5118	0.078791	4.13879	0.0111102	1.49025	0.360068	71.2258	1.0556	77.0076	3.06933	260.373	88.7337	71.185	1.056		8.1	discord.
Run2-Spot 81	148.264	165.141	4.81249e+06	2.06442	19.5033	2.24438	0.0800489	2.43754	0.0113428	0.950975	0.390138	72.7088	0.687558	78.1909	1.8344	249.116	51.6522	72.667	0.688		7.54	discord.
Run1-Spot 224	747.602	817.151	9812.83	2.52608	20.4411	1.31335	0.0750643	1.73674	0.011467	1.12693	0.648874	73.5003	0.823592	73.4939	1.2313	73.2722	31.4135	73.5	0.823		-0.00906	concordant
Run1-Spot 68	354.259	403.371	4629.32	1.69512	19.2933	1.62922	0.0773796	1.9104	0.0115101	0.990939	0.518707	73.7753	0.726901	75.6783	1.3932	136.183	38.3565	73.778	0.727		2.64	concordant
Run2-Spot 23	596.504	656.236	171372	2.3468	20.9068	1.14138	0.0757465	1.65195	0.0115368	1.19423	0.722923	73.9455	0.878035	74.138	1.18108	80.3283	27.0995	73.952	0.878		0.27	concordant
Run2-Spot 41	1306.13	1468.35	171063	1.89214	20.7112	1.00718	0.0772163	1.52201	0.0116365	1.14109	0.749724	74.5809	0.846132	75.5245	1.10778	105.466	23.8133	74.603	0.846		1.3	concordant
Run1-Spot 28	541.194	649.195	9130.04	1.17759	20.7279	1.84959	0.075674	2.35162	0.0117832	1.19265	0.507162	75.5156	0.895383	74.0696	1.67982	27.6698	NA	75.488	0.895		-2	rev discord.
Run1-Spot 283	311.417	344.187	19302.3	2.23321	20.3868	2.03258	0.0787785	2.33135	0.0117992	1.11678	0.479027	75.6174	0.839544	76.9959	1.72867	119.972	48.2224	75.623	0.84		1.88	concordant
Run1-Spot 252	814.122	913.016	20988.4	1.93458	20.4594	1.30163	0.0810912	1.96836	0.0121773	1.28549	0.653074	78.0256	0.996963	79.1703	1.49915	113.855	35.1883	78.04	0.997		1.51	concordant
Run2-Spot 3	89.9074	100.907	3582.2	1.92079	8.6526	17.7439	0.187884	17.8449	0.0122293	1.75379	0.0982795	78.3572	1.3659	174.822	28.6666	1822.79	324.857	78.115	1.364		85.1	discord.
Run1-Spot 315	282.524	315.262	18896.2	2.02798	20.5945	1.76373	0.0820283	2.11723	0.0124253	1.14621	0.541371	79.6053	0.906831	80.0501	1.62976	93.3229	42.1731	79.611	0.907		0.579	concordant
Run1-Spot 83	1625.13	1772.88	33523.4	2.58484	20.8327	0.992243	0.0818014	1.44572	0.0124557	1.05093	0.726924	79.7985	0.833454	79.8372	1.11001	80.9719	23.5793	79.8	0.833		0.0504	concordant
Run2-Spot 61	166.516	200.87	3139.27	1.13908	5.44877	13.6443	0.330539	14.3968	0.013368	4.52252	0.314133	85.6047	3.8459	289.977	36.331	2646.68	227.995	80.916	3.745		133	discord.
Run1-Spot 194	150.014	210.518	10649	0.58266	17.6042	2.54248	0.0994453	2.79198	0.0129978	1.14456	0.409944	83.2495	0.946711	96.2642	2.56421	431.988	56.7592	82.989	0.946		15.2	discord.
Run1-Spot 113	932.51	993.444	10299.6	3.59637	20.2766	0.963521	0.0859627	1.60796	0.013002	1.28388	0.798453	83.2758	1.06229	83.7355	1.29241	96.8428	22.8978	83.3	1.062		0.573	concordant
Run1-Spot 48	258.31	294.358	18847.8	1.68395	19.7415	1.85939	0.0894967	2.31304	0.0130292	1.31115	0.566852	83.449	1.08709	87.0345	1.92928	186.502	44.3416	83.433	1.088		4.39	discord.
Run1-Spot 305	689.411	743.743	14556.7	2.98187	20.3606	1.48081	0.0879004	1.94456	0.0132191	1.20536	0.619863	84.6575	1.01376	85.5457	1.59534	110.426	36.0423	84.671	1.014		1.09	concordant
Run2-Spot 70	413.113	476.77	15911.8	1.52508	19.9504	1.63015	0.0895477	1.95858	0.0132288	1.0691	0.545855	84.7193	0.899807	87.0819	1.63448	152.362	38.4599	84.726	0.9		2.87	concordant
Run2-Spot 18	361.337	422.126	6414.79	1.39687	12.9012	4.18124	0.139744	4.49931	0.0135002	1.65431	0.367682	86.4454	1.42053	132.816	5.60153	1070.52	84.1082	84.804	1.41		45.4	discord.
Run1-Spot 102	602.497	603.999	138695	94.2936	16.5952	2.88104	0.111345	3.07385	0.0134256	1.07154	0.348598	85.9713	0.915101	107.195	3.12705	608.945	62.2804	85.539	0.914		23.1	discord.		high U/Th
Run2-Spot 20	932.579	1049.06	43017.9	1.88139	20.3999	1.34789	0.0905127	1.92322	0.0135283	1.34306	0.69834	86.6247	1.15564	87.9808	1.62083	124.908	32.4003	86.651	1.156		1.62	concordant
Run2-Spot 63	962.414	987.65	91952.6	8.96196	20.7483	1.03629	0.0895957	1.62774	0.0135458	1.25502	0.771023	86.7359	1.08126	87.1266	1.35905	97.8696	24.5301	86.754	1.081		0.469	concordant
Run2-Spot 109	334.635	375.599	38934	1.91972	20.5111	2.05408	0.0910062	2.35754	0.0136396	1.09962	0.466428	87.3325	0.953853	88.4403	1.9968	118.428	49.1659	87.34	0.954		1.32	concordant
Run2-Spot 100	45.4821	53.6769	5659.47	1.30428	20.3345	4.08389	0.0880886	5.14336	0.0137341	1.37404	0.267148	87.9333	1.20003	85.7213	4.228	24.5589	NA	87.922	1.2		-2.66	rev discord.
Run2-Spot 15	426.356	452.67	41653.8	3.8076	20.1516	1.51764	0.0933081	1.86417	0.0137811	1.07502	0.576677	88.2321	0.942053	90.5803	1.61544	152.882	35.669	88.243	0.942		2.74	concordant
Run1-Spot 94	1556.08	1626.65	41546.7	5.18188	21.0311	1.09139	0.0900602	1.75884	0.0138265	1.37508	0.781813	88.5209	1.20892	87.5594	1.4755	61.4469	26.1529	88.444	1.206		-1.14	concordant
Run1-Spot 247	1362.46	1462.59	94752.8	3.19765	20.9019	0.743692	0.0913656	1.23091	0.0138524	0.97908	0.79541	88.6852	0.862354	88.7747	1.04633	91.1716	17.6714	88.691	0.861		0.105	concordant
Run1-Spot 263	1105.66	1214.9	56754.9	2.37837	20.6235	1.07161	0.0923931	1.696	0.0138668	1.31291	0.774119	88.7773	1.15757	89.7302	1.45652	115.172	25.3262	88.815	1.158		1.11	concordant
Run2-Spot 45	405.773	454.66	128117	1.95056	21.3726	1.69234	0.0892684	2.13333	0.0138902	1.29887	0.608844	88.926	1.1471	86.8217	1.77522	29.3417	NA	88.843	1.145		-2.5	rev discord.
Run1-Spot 5	436.5	481.303	29441.2	2.28956	20.1594	2.04348	0.0947975	2.2896	0.014013	1.02527	0.447795	89.7065	0.913364	91.9627	2.01304	150.899	47.9914	89.713	0.914		2.6	concordant
Run2-Spot 55	1510.69	1653.15	210352	2.49205	20.4014	0.87321	0.0950438	1.69213	0.0141094	1.4494	0.856553	90.3191	1.29996	92.1911	1.49127	140.894	20.5008	90.402	1.302		2.14	concordant
Run1-Spot 294	711.411	810.111	11808.4	1.69383	16.6906	2.69964	0.115277	2.94482	0.0142115	1.17489	0.398967	90.9683	1.06127	110.781	3.09066	560.82	58.8503	90.471	1.06		20.7	discord.
Run1-Spot 96	969.081	1018.88	19993	4.57339	20.7932	1.37098	0.0924828	1.80872	0.0141657	1.16137	0.642096	90.6771	1.04573	89.8136	1.55471	66.9049	33.0108	90.646	1.045		-0.999	concordant
Run1-Spot 195	369.509	397.965	50527.3	3.05151	20.4896	1.90305	0.0948953	2.08461	0.0141655	0.850583	0.40803	90.6762	0.765877	92.0534	1.83454	127.92	44.7907	90.682	0.766		1.58	concordant
Run1-Spot 237	859.58	921.331	19026.2	3.27121	20.7986	1.15194	0.0928208	1.88636	0.014195	1.4895	0.789618	90.8637	1.34393	90.1277	1.62686	70.6772	27.5363	90.804	1.341		-0.85	concordant
Run2-Spot 108	677.57	743.982	1.25571e+07	2.3976	20.1419	1.137	0.0977614	1.65884	0.0142769	1.20788	0.728146	91.384	1.09602	94.7079	1.50001	179.224	26.501	91.385	1.098		3.74	discord.
Run1-Spot 7	3545.82	3580.29	288939	24.1754	20.7434	0.773971	0.0947337	1.59478	0.014279	1.39432	0.874303	91.3972	1.26538	91.9035	1.40129	105.044	18.271	91.452	1.264		0.579	concordant		high U/Th
Run1-Spot 279	1443.92	1477.62	64237.1	10.0668	20.9966	0.706231	0.0941623	1.54763	0.0143735	1.36813	0.884019	91.998	1.24972	91.3734	1.35236	75.0867	17.2156	91.892	1.244		-0.718	concordant		high U/Th
Run1-Spot 116	1249.43	1410.63	34498.5	1.82141	20.7729	0.981555	0.0946857	1.59399	0.0143692	1.25515	0.787424	91.9708	1.14618	91.859	1.39995	88.9792	23.2875	91.963	1.145		-0.127	concordant
Run1-Spot 27	541.114	586.631	33337.3	2.79372	21.4215	1.44113	0.091875	1.70531	0.0144255	0.798154	0.468041	92.3284	0.73167	89.2486	1.45699	7.64417	NA	92.258	0.731		-3.54	rev discord.
Run1-Spot 232	198.851	223.688	4730.52	1.88142	19.6004	2.26716	0.0957032	2.76045	0.014458	0.906981	0.328563	92.5349	0.833278	92.8023	2.44818	99.7058	61.7075	92.536	0.833		0.302	concordant
Run2-Spot 31	400.361	442.832	56689.3	2.21527	21.137	1.55838	0.0935717	1.70745	0.01447	0.697687	0.408614	92.6114	0.641518	90.8251	1.48346	44.1655	37.2536	92.589	0.641		-2.04	rev discord.
Run2-Spot 58	273.924	300.295	8568.28	2.44103	20.8616	1.8321	0.0923162	2.30343	0.0145117	1.17255	0.509044	92.8761	1.08121	89.6587	1.97668	4.84671	NA	92.782	1.079		-3.68	rev discord.
Run1-Spot 164	153.139	169.952	4224.44	2.14052	19.1386	2.55149	0.0977803	3.50593	0.0145146	1.15328	0.328951	92.8947	1.06366	94.7253	3.17082	141.056	77.7476	92.899	1.064		2.04	concordant
Run1-Spot 57	551.959	603.516	23220.1	2.51586	19.0349	1.93017	0.10416	2.21963	0.0145471	1.09294	0.492397	93.1012	1.01023	100.609	2.12608	282.376	44.1949	93.004	1.011		8.14	discord.
Run2-Spot 56	576.122	667.48	28155.3	1.48196	21.1873	1.28947	0.0938575	1.61471	0.0146117	0.792636	0.490885	93.5117	0.735857	91.0904	1.4068	28.0903	NA	93.456	0.735		-2.74	rev discord.
Run2-Spot 110	211.887	240.666	7023.7	1.73022	20.9793	2.14761	0.092257	3.39608	0.0146817	1.24964	0.367965	93.9566	1.1656	89.6037	2.91262	NA	NA	93.888	1.164		-4.96	rev discord.
Run2-Spot 32	86.487	93.3774	368217	2.9497	19.1058	2.86581	0.10646	3.1938	0.0148104	1.40978	0.441413	94.7738	1.32633	102.722	3.12024	291.299	65.4694	94.692	1.327		8.45	discord.
Run2-Spot 40	1094.86	1117.71	39985.7	11.2557	20.5151	1.31145	0.100369	1.94798	0.0150667	1.43996	0.739208	96.4019	1.37782	97.1171	1.80417	114.69	30.9726	96.431	1.377		0.774	concordant		high U/Th
Run1-Spot 67	524.067	576.101	82334.7	2.36687	20.2732	1.46216	0.102457	1.8707	0.0150821	1.16677	0.623708	96.4993	1.11754	99.0421	1.76529	160.712	34.204	96.52	1.118		2.73	concordant
Run1-Spot 286	794.725	888.825	124506	1.9847	20.7879	1.07952	0.100041	1.6822	0.0150826	1.29008	0.766901	96.5029	1.23569	96.8146	1.55339	104.483	25.539	96.52	1.235		0.338	concordant
Run1-Spot 89	312.43	342.158	25711.4	2.46972	20.3064	2.24252	0.1016	2.45365	0.0151431	0.96576	0.393601	96.8871	0.928701	98.2519	2.2978	131.522	53.0507	96.894	0.929		1.47	concordant
Run1-Spot 290	792.192	850.972	17663.9	3.16716	20.5805	1.07928	0.100256	1.58688	0.0151878	1.16125	0.731782	97.1707	1.11993	97.0126	1.46822	93.1039	25.5939	97.163	1.119		-0.171	concordant
Run1-Spot 200	130.654	138.805	5032.83	3.76691	18.7153	3.05587	0.106385	3.47725	0.0152426	1.23256	0.354463	97.5188	1.19293	102.653	3.39502	223.533	75.1872	97.509	1.193		5.39	discord.
Run1-Spot 140	486.103	528.875	40475.9	2.67077	20.9688	2.04616	0.0997243	2.49893	0.0152727	1.43158	0.572879	97.7099	1.38825	96.5218	2.30092	67.2414	48.7519	97.677	1.387		-1.28	concordant
Run1-Spot 230	1015.92	1134.55	63558.5	2.0125	18.8183	1.53283	0.112696	2.45269	0.0154134	1.90984	0.778672	98.6034	1.86884	108.428	2.52235	329.98	34.9058	97.772	1.875		10.1	discord.
Run1-Spot 16	1201.26	1204.37	184697	90.627	19.594	1.14224	0.10748	1.774	0.0153312	1.35716	0.76503	98.0816	1.32105	103.658	1.74814	233.843	26.3784	97.944	1.325		5.82	discord.		high U/Th
Run1-Spot 117	716.469	763.894	83888.3	3.55028	15.384	2.26633	0.141988	2.85724	0.015856	1.73986	0.608932	101.412	1.75063	134.813	3.60719	772.591	47.7229	97.955	1.733		30.5	discord.
Run1-Spot 23	1900.38	2305.05	33863.3	1.10356	20.4225	0.985444	0.103281	1.57745	0.0154721	1.23173	0.780834	98.976	1.2098	99.8002	1.4994	119.511	23.2327	99.019	1.209		0.87	concordant
Run1-Spot 248	1271.02	1475.37	57527.8	1.4616	20.764	1.03531	0.103099	1.49541	0.0155643	1.07712	0.720284	99.5614	1.06416	99.6332	1.41917	101.33	24.5552	99.565	1.063		0.0757	concordant
Run1-Spot 21	941.759	998.91	165616	3.87246	21.1449	0.876414	0.101346	1.33699	0.0156091	1.00938	0.754967	99.8453	1.00006	98.0184	1.24923	53.7976	20.9159	99.686	0.996		-1.94	rev discord.
Run1-Spot 74	1237.3	1417.6	30568.1	1.61271	20.4305	1.28456	0.104731	1.86569	0.0156638	1.35039	0.723798	100.193	1.34253	101.134	1.79593	123.361	30.3213	100.227	1.342		0.982	concordant
Run1-Spot 130	518.137	563.089	272453	2.70871	20.6777	1.33847	0.104961	1.70014	0.0157193	1.04832	0.616606	100.545	1.04585	101.345	1.63981	120.203	31.521	100.562	1.046		0.832	concordant
Run1-Spot 226	392.603	406.569	6721.58	6.60654	20.6374	1.22007	0.100519	2.59319	0.0157404	1.00914	0.389153	100.679	1.0081	97.2549	2.40499	14.0738	NA	100.626	1.007		-3.63	rev discord.
Run1-Spot 87	480.703	538.001	7042.69	1.97154	21.0024	1.5687	0.0991864	1.92391	0.0158098	1.09868	0.571067	101.119	1.10231	96.025	1.76277	NA	NA	100.849	1.098		-5.42	rev discord.
Run1-Spot 107	915.952	1015.23	94572.9	2.16813	20.468	1.21819	0.106251	1.8559	0.0158095	1.39819	0.753375	101.117	1.40278	102.531	1.80994	135.531	28.6573	101.169	1.403		1.46	concordant
Run1-Spot 147	444.662	495.74	91708.4	2.0458	18.5078	1.64212	0.118202	1.91198	0.0159	0.979254	0.512169	101.692	0.988007	113.44	2.05218	367.556	36.9855	101.415	0.989		11.5	discord.
Run1-Spot 281	262.801	290.608	11203.6	2.22094	20.6415	1.57789	0.103455	2.15559	0.0158796	1.09647	0.508664	101.562	1.10487	99.9607	2.05208	61.9125	44.218	101.527	1.104		-1.67	concordant
Run1-Spot 311	1284.75	1505.89	219710	1.36527	20.3125	0.888235	0.108665	1.4476	0.0159843	1.14288	0.789498	102.226	1.15911	104.743	1.44068	162.361	20.7737	102.297	1.161		2.56	concordant
Run2-Spot 42	974.045	1088.15	34200.1	2.0061	20.733	1.07184	0.105817	1.79257	0.0160788	1.37494	0.767021	102.826	1.40258	102.132	1.74172	85.979	27.2696	102.774	1.399		-0.712	concordant
Run1-Spot 33	900.516	1021.15	80512.7	1.75431	20.6819	0.991354	0.106888	1.62776	0.0161077	1.29089	0.793048	103.01	1.31917	103.114	1.59604	105.514	23.4542	103.017	1.317		0.107	concordant
Run1-Spot 66	666.97	720.227	89455.1	2.94304	20.064	1.13016	0.111196	1.7456	0.0161942	1.32776	0.760632	103.559	1.36402	107.059	1.77367	185.634	26.3745	103.595	1.367		3.5	concordant
Run2-Spot 28	1133.89	1300.12	173215	1.60296	20.0638	1.08011	0.11196	1.79215	0.0163673	1.43008	0.797969	104.656	1.48458	107.757	1.83222	176.821	25.1872	104.724	1.488		3.07	concordant
Run1-Spot 15	1139.06	1260.59	38136.2	2.20263	20.1868	1.33009	0.111544	1.83267	0.0164953	1.25605	0.685368	105.468	1.31396	107.377	1.86739	149.93	31.2788	105.511	1.315		1.89	concordant
Run1-Spot 297	3256.34	3392.28	458000	5.62907	20.5753	0.838235	0.11442	1.5627	0.0170459	1.31885	0.843954	108.959	1.42492	110	1.62914	132.582	19.7035	109.053	1.424		1	concordant
Run1-Spot 153	214.251	246	7127.73	1.58587	19.8299	2.39209	0.115129	3.32046	0.0172331	1.3768	0.414641	110.145	1.50359	110.647	3.4809	121.454	71.2115	110.15	1.503		0.479	concordant
Run1-Spot 158	141.547	159.038	82813.1	1.90175	19.8945	3.02923	0.12054	3.21423	0.017395	1.07473	0.334366	111.171	1.18455	115.562	3.51086	206.951	70.2798	111.174	1.185		4.09	discord.
Run2-Spot 25	878.37	928.838	1.49629e+07	4.09008	20.3485	1.15274	0.121194	1.81321	0.0179383	1.39961	0.771898	114.612	1.58996	116.154	1.99011	147.836	27.0048	114.691	1.59		1.41	concordant
Run2-Spot 4	413.623	451.789	22880.3	2.5468	20.4971	1.09682	0.128538	1.59886	0.0194119	0.95888	0.599726	123.938	1.17707	122.783	1.84909	100.486	30.2625	123.895	1.175		-0.993	concordant
Run2-Spot 21	2314.07	2363.22	107524	11.0644	20.0709	0.76414	0.140169	1.6281	0.0205247	1.43569	0.88182	130.971	1.86136	133.195	2.03233	173.013	17.9181	131.265	1.863		1.8	concordant		high U/Th
Run1-Spot 156	125.118	137.391	37942.3	2.3958	19.2549	1.39757	0.154047	1.86777	0.0215876	1.23768	0.662651	137.682	1.68599	145.479	2.53154	274.56	32.0518	137.665	1.69		5.9	discord.
Run1-Spot 191	180.049	204.02	5972.62	1.76504	19.5837	1.83713	0.145221	2.341	0.0216707	1.01578	0.433908	138.206	1.38893	137.684	3.0142	128.704	49.6317	138.198	1.388		-0.405	concordant
Run1-Spot 168	311.768	369.108	10303.8	1.27772	20.1259	1.67795	0.145355	1.90406	0.0218271	0.893481	0.469251	139.193	1.23033	137.802	2.45358	113.899	39.6838	139.163	1.229		-1.07	concordant
Run2-Spot 67	119.727	133.32	12441.9	2.06985	19.8446	2.21854	0.14798	2.39009	0.0218498	0.860186	0.359896	139.336	1.18569	140.127	3.12835	153.567	52.2185	139.342	1.186		0.606	concordant
Run1-Spot 187	405.531	485.272	33178.6	1.19513	20.569	1.29613	0.146231	1.56912	0.0220047	0.881285	0.561644	140.313	1.2232	138.579	2.03261	108.987	30.678	140.25	1.221		-1.33	concordant
Run1-Spot 106	538.192	577.12	9613.74	3.24889	13.7667	2.48109	0.247869	4.07245	0.0252364	3.2291	0.792915	160.666	5.12394	224.844	8.21388	964.181	50.6598	140.458	4.941		40.1	discord.
Run2-Spot 51	348.354	420.426	42086.9	1.13585	20.1414	1.33387	0.151991	1.71325	0.0224089	1.06981	0.624434	142.862	1.51154	143.668	2.29519	157.018	31.3005	142.891	1.51		0.602	concordant
Run2-Spot 14	194.279	227.229	18808.1	1.38558	19.8532	2.03773	0.152883	2.25454	0.0224457	0.960298	0.425939	143.094	1.35899	144.454	3.03573	166.814	47.6588	143.11	1.359		1.01	concordant
Run1-Spot 298	230.295	246.873	11593.3	3.2645	19.7139	1.51789	0.153947	1.8151	0.0225236	0.984567	0.542431	143.585	1.39806	145.391	2.45877	174.938	35.5891	143.622	1.398		1.34	concordant
Run1-Spot 214	365.079	410.262	18785.4	1.89879	19.9363	1.25039	0.154149	1.5665	0.0226113	0.928557	0.592759	144.138	1.32355	145.569	2.12442	168.919	29.4667	144.179	1.323		1.06	concordant
Run1-Spot 43	1840.32	1846.17	106478	73.9149	13.3515	1.97386	0.395282	5.46454	0.0384627	5.09553	0.932472	243.297	12.1663	338.221	15.7204	1056.04	39.7737	144.69	10.35		67.5	discord.		high U/Th
Run1-Spot 250	206.814	225.151	13911.4	2.65059	19.7111	2.41119	0.155883	2.79572	0.0227012	1.22718	0.438949	144.705	1.75601	147.093	3.82834	185.742	58.4723	144.731	1.756		1.76	concordant
Run2-Spot 35	179.761	196.951	14673.5	2.45747	19.9831	1.7533	0.154068	2.40683	0.0228368	1.29263	0.537067	145.559	1.86046	145.498	3.26256	144.469	47.6573	145.558	1.859		-0.0454	concordant
Run1-Spot 25	196.191	217.721	99888.3	2.14149	19.7829	1.79815	0.158546	2.09578	0.0228375	1.07649	0.513646	145.564	1.54941	149.429	2.91217	211.228	41.6834	145.61	1.55		2.81	concordant
Run1-Spot 92	107.1	127.124	4151.99	1.25693	17.56	2.53033	0.169823	4.25522	0.023062	0.873111	0.205186	146.979	1.26877	159.265	6.27239	346.112	94.2351	146.965	1.269		8.65	discord.
Run1-Spot 148	63.2073	70.6208	10939.6	2.00359	18.9166	4.09132	0.164282	4.25419	0.0231064	1.15451	0.271382	147.258	1.68084	154.445	6.09516	266.196	93.985	147.264	1.681		5.13	discord.
Run1-Spot 56	66.5226	73.8066	5356.41	2.1462	19.0855	2.55799	0.159199	3.68134	0.0232431	1.33574	0.36284	148.12	1.95594	150.002	5.13361	179.829	79.9823	148.135	1.956		1.36	concordant
Run1-Spot 127	179.9	195.56	11105.5	2.69967	18.0063	1.72639	0.175094	2.14867	0.0233958	1.19839	0.557738	149.082	1.76608	163.83	3.25086	382.619	40.0696	148.823	1.77		10.2	discord.
Run1-Spot 209	461.851	506.399	51905.1	2.43632	15.1378	2.16063	0.217407	2.48256	0.0239377	1.21852	0.490832	152.494	1.83636	199.75	4.50163	802.242	45.3287	149.991	1.832		29.5	discord.
Run2-Spot 26	128.696	144.348	59971.3	1.93225	16.654	3.99337	0.195251	4.1472	0.023748	1.11636	0.269184	151.3	1.66939	181.1	6.87901	590.157	86.6377	151.042	1.67		19.5	discord.
Run1-Spot 2	421.902	449.917	35651.2	3.53899	20.0809	1.23989	0.162982	1.4894	0.0239465	0.823844	0.553139	152.55	1.24202	153.31	2.11937	165.056	29.0233	152.571	1.241		0.535	concordant
Run2-Spot 22	135.278	146.66	51287.7	2.79297	20.5254	2.15771	0.159657	2.74452	0.0239719	1.69588	0.617913	152.71	2.55934	150.403	3.8367	114.19	50.9141	152.584	2.552		-1.64	concordant
Run1-Spot 55	339.262	371.215	11010.5	2.49513	19.9759	1.39677	0.161646	1.63505	0.0240572	0.840916	0.514307	153.247	1.27348	152.143	2.31022	134.992	32.9374	153.216	1.272		-0.777	concordant
Run2-Spot 52	288.881	310.33	26968.1	3.16502	20.1038	1.44378	0.16292	1.80411	0.0240761	1.07786	0.597446	153.366	1.63356	153.256	2.56636	151.577	33.8856	153.361	1.632		-0.0771	concordant
Run1-Spot 114	140.046	149.404	55140.2	3.51697	19.2124	2.08305	0.172297	2.35192	0.0240913	1.09184	0.464233	153.461	1.65576	161.41	3.50989	279.702	47.7062	153.479	1.657		5.45	discord.
Run2-Spot 88	350.774	409.248	1.82783e+06	1.40973	19.1621	1.83124	0.173786	2.07573	0.0241934	0.977365	0.470853	154.104	1.4883	162.699	3.12053	289.701	41.8565	154.115	1.49		5.86	discord.
Run2-Spot 87	366.072	411.469	18346.7	1.89497	20.362	1.28457	0.16162	1.57907	0.0243024	0.901276	0.570762	154.79	1.37847	152.12	2.23081	110.689	30.6343	154.671	1.375		-1.87	rev discord.
Run1-Spot 161	958.657	1140.38	1.08807e+06	1.23971	20.2671	1.07967	0.165791	1.5465	0.0243024	1.10724	0.715963	154.79	1.69348	155.76	2.23316	170.512	25.2093	154.853	1.691		0.672	concordant
Run1-Spot 307	500.264	553.343	46264.7	2.21487	20.2625	1.31877	0.165917	1.61137	0.024477	0.922305	0.572374	155.889	1.42052	155.869	2.32835	155.575	30.9366	155.888	1.419		-0.0136	concordant
Run1-Spot 80	326.471	363.977	26184.5	2.04552	20.3377	1.6178	0.164726	1.92711	0.0245257	1.03629	0.537743	156.195	1.59919	154.832	2.76743	134.007	38.1922	156.15	1.597		-0.944	concordant
Run1-Spot 109	316.316	334.647	407185	4.05506	20.5155	1.27816	0.165108	1.75545	0.0245635	1.2033	0.685464	156.433	1.8597	155.164	2.52593	135.806	30.0356	156.343	1.854		-0.877	concordant
Run1-Spot 75	821.849	913.702	61313.3	2.10265	19.6366	1.02267	0.171402	1.66234	0.0245117	1.3075	0.786539	156.107	2.01658	160.635	2.4698	227.925	23.719	156.363	2.021		3.08	concordant
Run1-Spot 199	376.943	406.498	79888.7	2.99718	19.8323	1.41565	0.170387	1.78685	0.02454	1.09028	0.61017	156.285	1.68346	159.755	2.64134	211.482	32.8233	156.373	1.684		2.37	concordant
Run2-Spot 48	1296.71	1448.47	2.08193e+06	2.00796	20.3995	0.911229	0.165894	1.60306	0.0245918	1.31888	0.82273	156.611	2.04063	155.849	2.31607	144.252	21.3795	156.49	2.028		-0.527	concordant
Run1-Spot 63	576.79	648.672	21186	1.88568	20.0058	1.21116	0.167367	1.64478	0.0245768	0.985978	0.599458	156.517	1.52464	157.132	2.39443	166.39	30.771	156.539	1.523		0.422	concordant
Run1-Spot 193	729.393	852.645	4.22387e+06	1.39071	19.2234	0.996404	0.176428	1.8358	0.0245965	1.54186	0.839886	156.641	2.38608	164.983	2.7955	286.407	22.7639	156.804	2.406		5.6	discord.
Run2-Spot 64	432.485	478.426	124961	2.21223	20.1405	1.07071	0.168027	1.55989	0.0246359	1.13436	0.727203	156.889	1.7582	157.706	2.27851	169.973	25.0253	156.947	1.755		0.559	concordant
Run1-Spot 242	533.131	602.902	30936.1	1.79569	19.8591	1.27611	0.169978	1.59122	0.0246361	0.924235	0.580833	156.89	1.43253	159.399	2.34734	196.85	30.1208	156.954	1.433		1.71	concordant
Run2-Spot 6	484.105	577.099	230903	1.22335	19.7353	1.17111	0.171687	1.51265	0.0246657	0.957362	0.632905	157.076	1.48562	160.882	2.25057	217.283	27.1009	157.18	1.487		2.58	concordant
Run1-Spot 227	1275.46	1474.46	167625	1.50625	20.1723	0.901718	0.168508	1.5099	0.0246654	1.21079	0.801902	157.074	1.87886	158.123	2.21089	173.85	21.0633	157.191	1.875		0.718	concordant
Run1-Spot 129	407.122	442.39	246084	2.71278	19.8748	1.21146	0.171465	1.57488	0.0246839	1.00624	0.638935	157.191	1.5626	160.69	2.34059	212.555	28.0703	157.295	1.563		2.37	concordant
Run2-Spot 5	168.283	185.519	17594	2.29451	19.9112	1.75283	0.167856	2.17739	0.0247114	0.97515	0.447853	157.363	1.51595	157.557	3.17772	160.45	45.5425	157.367	1.515		0.133	concordant
Run2-Spot 38	193.415	205.98	25261.6	3.61731	20.0451	1.8144	0.167668	2.18593	0.024714	1.20398	0.550786	157.38	1.87187	157.393	3.18711	157.57	42.6884	157.38	1.87		0.00892	concordant
Run1-Spot 271	356.138	384.062	16034.5	2.9972	20.3203	1.82369	0.16514	2.12849	0.0247285	1.0837	0.509138	157.471	1.68583	155.193	3.06322	120.537	43.1735	157.399	1.683		-1.57	concordant
Run1-Spot 249	1104.48	1235.6	57976.9	1.97947	20.4142	1.25287	0.16669	1.8188	0.0247368	1.31826	0.7248	157.523	2.0514	156.542	2.63857	141.727	29.4047	157.438	2.044		-0.673	concordant
Run1-Spot 50	220.861	247.689	19481.3	1.93466	20.075	2.1563	0.167281	2.58369	0.0247467	1.19673	0.463188	157.586	1.86302	157.057	3.75962	149.08	53.681	157.575	1.862		-0.363	concordant
Run1-Spot 291	813.926	897.575	68976.7	2.28661	20.0764	1.08178	0.169648	1.54817	0.0247456	1.10734	0.715261	157.579	1.72378	159.114	2.28004	182.005	25.2074	157.673	1.722		1.04	concordant
Run1-Spot 260	155.638	174.141	12377.3	1.97675	20.0334	2.38567	0.166781	2.65502	0.0247929	1.15162	0.433752	157.876	1.79605	156.622	3.85352	137.674	56.2237	157.852	1.795		-0.86	concordant
Run1-Spot 241	470.069	540.707	35740.6	1.56384	19.4267	1.38152	0.175458	1.76139	0.0248401	1.06416	0.604163	158.173	1.66274	164.144	2.66963	251.177	32.3029	158.261	1.665		4	discord.
Run2-Spot 53	263.446	298.236	30421.9	1.7795	20.0363	1.48044	0.169568	1.77141	0.0249421	0.933277	0.526856	158.815	1.46407	159.044	2.60777	162.438	35.1968	158.821	1.463		0.156	concordant
Run1-Spot 210	264.974	309.746	20718	1.39081	19.8186	1.60266	0.171394	1.94013	0.024954	0.872491	0.449707	158.889	1.36935	160.628	2.88241	186.322	40.336	158.915	1.369		1.18	concordant
Run1-Spot 188	1623.71	1852.21	374801	1.6699	20.1824	1.02763	0.170437	1.58697	0.024955	1.2093	0.76202	158.896	1.89804	159.798	2.34647	173.171	23.9829	158.976	1.894		0.611	concordant
Run1-Spot 159	519.986	588.706	18964.4	1.77818	20.0638	1.28913	0.170023	1.62105	0.0250562	0.964096	0.594737	159.532	1.51917	159.439	2.39189	158.043	30.4753	159.529	1.517		-0.063	concordant
Run1-Spot 243	437.652	477.997	84272.2	2.54922	20.0282	1.47654	0.172443	1.80436	0.0250573	1.03233	0.572132	159.539	1.62676	161.537	2.69468	190.948	34.4409	159.593	1.626		1.34	concordant
Run2-Spot 106	775.285	938.564	46504.4	1.11583	20.0563	1.05361	0.171392	1.60549	0.0250819	1.2103	0.753851	159.694	1.90903	160.626	2.38521	174.373	24.6142	159.772	1.905		0.628	concordant
Run1-Spot 287	747.133	838.716	73349.5	1.91712	20.3606	0.992329	0.169788	1.73551	0.0251125	1.42219	0.819468	159.886	2.24593	159.235	2.55774	149.575	23.2916	159.784	2.233		-0.442	concordant
Run1-Spot 88	478.331	533.053	40033.8	2.05416	20.1791	1.25042	0.1705	1.57608	0.0251458	0.953743	0.605136	160.096	1.5081	159.853	2.33111	156.267	29.3522	160.085	1.506		-0.164	concordant
Run2-Spot 75	463.961	502.765	29597.6	2.80975	20.4097	1.18107	0.168142	1.53885	0.0251727	0.985962	0.640715	160.265	1.56067	157.805	2.24909	121.016	27.8616	160.107	1.555		-1.67	concordant
Run2-Spot 16	694.354	739.683	101171	3.59975	15.9304	2.09545	0.220106	2.57006	0.025574	1.48802	0.578984	162.788	2.39199	201.998	4.70771	688.584	44.7109	160.139	2.392		23.7	discord.
Run1-Spot 97	143.84	152.789	8864.89	3.77724	20.3986	1.96776	0.164462	2.38851	0.0251912	1.19569	0.500602	160.381	1.894	154.601	3.4253	66.8692	49.2198	160.145	1.888		-3.95	rev discord.
Run2-Spot 74	349.05	396.16	11207.6	1.7412	19.9834	1.16639	0.168886	1.50084	0.0251799	0.94325	0.628482	160.31	1.49348	158.452	2.20184	130.734	27.4694	160.204	1.489		-1.26	concordant
Run1-Spot 177	1056.09	1197.75	54324.3	1.75196	20.3603	0.794615	0.170058	1.39039	0.0252582	1.13671	0.817543	160.802	1.80524	159.469	2.05191	139.736	18.7843	160.581	1.792		-0.901	concordant
Run2-Spot 7	380.233	413.583	39919.1	2.67931	19.8789	1.47302	0.173251	1.75117	0.0252249	0.944519	0.539363	160.593	1.49809	162.237	2.6257	186.273	34.3254	160.633	1.498		1.1	concordant
Run1-Spot 123	667.016	755.723	1.28253e+06	1.76704	18.2074	2.18662	0.192339	2.35978	0.0254029	0.887282	0.376002	161.712	1.41699	178.623	3.86519	408.7	48.9339	161.601	1.418		10.8	discord.
Run1-Spot 261	497.94	562.997	19559.8	1.79868	20.2379	1.26801	0.170913	1.61794	0.0254424	1.00329	0.620106	161.961	1.60469	160.211	2.39797	134.45	29.8239	161.865	1.601		-1.17	concordant
Run1-Spot 47	696.889	748.819	43999.9	3.15361	20.297	1.04522	0.172234	1.79624	0.025556	1.46023	0.812937	162.675	2.34571	161.356	2.67978	142.049	24.5505	162.461	2.329		-0.882	concordant
Run1-Spot 313	276.917	303.499	162131	2.44808	20.2119	1.30566	0.17443	1.68336	0.0255431	1.06243	0.631137	162.594	1.70584	163.256	2.53864	172.853	30.4653	162.624	1.704		0.439	concordant
Run1-Spot 280	228.187	253.632	67603.6	2.10744	19.7116	1.70664	0.178368	1.92062	0.0255429	0.880934	0.458673	162.592	1.41442	166.655	2.95194	224.732	39.4749	162.638	1.415		2.67	concordant
Run1-Spot 204	840.05	954.499	200724	1.72488	20.1394	1.10932	0.174935	1.76336	0.0255558	1.37056	0.777242	162.674	2.20164	163.693	2.66585	178.439	25.8824	162.775	2.197		0.675	concordant
Run1-Spot 42	253.857	281.507	39616	2.15752	19.9096	1.58216	0.176188	1.82179	0.0257092	0.902438	0.495358	163.637	1.45814	164.775	2.77095	181.127	36.8892	163.661	1.458		0.749	concordant
Run2-Spot 82	432.333	499.895	162373	1.50378	20.3195	1.12567	0.174852	1.38677	0.0258431	0.809458	0.583698	164.479	1.31455	163.621	2.09568	151.233	26.3851	164.443	1.312		-0.565	concordant
Run2-Spot 65	364.057	412.539	50823.8	1.76464	20.2423	1.2208	0.175131	1.55023	0.0258945	0.95534	0.616258	164.802	1.55446	163.862	2.34587	150.289	28.6126	164.755	1.551		-0.618	concordant
Run1-Spot 30	155.225	163.232	4967.96	4.55555	20.0652	2.60991	0.167963	3.01312	0.0260042	1.46729	0.486968	165.492	2.39734	157.649	4.3998	41.3765	NA	165.145	2.388		-5.24	rev discord.
Run1-Spot 270	771.404	840.316	55522.7	2.6306	20.1203	1.07891	0.177408	1.87533	0.0259511	1.53245	0.81716	165.158	2.49881	165.827	2.86916	175.371	25.2262	165.25	2.49		0.438	concordant
Run2-Spot 66	202.269	216.136	15342.6	3.42787	20.1008	1.59023	0.175315	1.87875	0.0261081	0.984987	0.524278	166.144	1.61559	164.021	2.84554	133.511	37.5927	166.07	1.613		-1.39	concordant
Run1-Spot 150	640.826	743.681	620629	1.46414	19.9707	1.07211	0.180409	1.68334	0.0260931	1.29776	0.770948	166.05	2.12742	168.413	2.61233	201.722	24.9088	166.246	2.126		1.53	concordant
Run2-Spot 1	230.252	255.41	25147.9	2.15083	19.7282	1.43745	0.18034	1.94665	0.0261544	1.17716	0.604714	166.435	1.93414	168.353	3.01997	195.42	36.0262	166.502	1.933		1.24	concordant
Run2-Spot 93	426.615	478.215	12473.8	1.9429	20.1537	1.30746	0.174793	1.54079	0.0262191	0.814079	0.52835	166.842	1.3408	163.57	2.32776	116.473	30.8321	166.712	1.338		-2.14	rev discord.
Run1-Spot 163	215.009	228.532	11525.6	3.73635	17.9253	1.37962	0.197954	1.76227	0.026259	1.0284	0.583564	167.092	1.69629	183.394	2.95684	398.916	32.0721	166.823	1.701		10.1	discord.
Run2-Spot 50	867.745	987.261	154397	1.70622	20.0458	1.13233	0.182008	1.7365	0.0265699	1.3165	0.75813	169.045	2.19654	169.787	2.71504	180.12	26.409	169.115	2.191		0.475	concordant
Run2-Spot 83	579.776	681.813	59186.5	1.33527	20.4616	1.03856	0.178955	1.54758	0.0267105	1.13523	0.733554	169.927	1.90386	167.161	2.38522	128.19	24.7507	169.612	1.892		-1.78	rev discord.
Run1-Spot 264	497.074	618.533	66658.2	0.96174	18.3424	2.37861	0.201202	2.5595	0.0268213	0.944794	0.369133	170.623	1.59089	186.143	4.35315	387.888	53.4139	170.563	1.592		9.49	discord.
Run1-Spot 205	698.379	761.776	89694	2.58876	19.9003	1.0164	0.185387	1.75545	0.0267777	1.43104	0.815201	170.349	2.40584	172.686	2.78765	204.791	23.5902	170.624	2.403		1.48	concordant
Run1-Spot 170	643.93	733.576	93088.1	1.68801	19.878	1.05561	0.186287	1.45066	0.0269403	0.994415	0.685491	171.37	1.68168	173.456	2.31307	201.984	24.5279	171.484	1.681		1.31	concordant
Run2-Spot 47	115.021	123.27	10133.4	3.27666	19.407	2.44734	0.185798	3.06125	0.0269574	1.13148	0.369615	171.478	1.91466	173.038	4.87038	194.434	66.1165	171.494	1.914		0.984	concordant
Run2-Spot 89	549.777	611.4	143991	2.09656	20.2313	0.985374	0.183174	1.40607	0.026975	1.00246	0.71295	171.588	1.6974	170.788	2.2103	159.699	23.0445	171.519	1.691		-0.506	concordant
Run2-Spot 68	373.109	421.791	27820.7	1.80109	19.8554	1.62034	0.184966	1.9427	0.0269671	1.06331	0.54734	171.538	1.79994	172.325	3.07908	183.106	37.8526	171.562	1.798		0.496	concordant
Run2-Spot 101	465.712	515.602	27064.4	2.19369	18.3598	1.61958	0.200507	1.87793	0.0269948	0.923234	0.491624	171.712	1.56438	185.555	3.18475	365.602	36.8544	171.649	1.567		8.46	discord.
Run2-Spot 97	240.631	287.823	14201.1	1.19826	19.9026	1.44042	0.186511	1.83235	0.0275338	1.05551	0.576045	175.095	1.82328	173.648	2.92464	153.962	35.056	175.03	1.819		-0.901	concordant
Run2-Spot 30	126.382	139.086	12905.3	2.33787	20.3903	1.92157	0.181793	2.36065	0.0276133	1.2432	0.526634	175.593	2.15351	169.602	3.68722	86.8352	47.5824	175.3	2.146		-3.77	rev discord.
Run1-Spot 198	190.952	213.225	17147.5	2.0147	18.9781	1.92831	0.198813	2.24339	0.0277751	1.12363	0.500864	176.608	1.95749	184.121	3.77772	281.663	44.4338	176.678	1.959		4.54	discord.
Run1-Spot 306	439.284	481.006	120390	2.47428	19.9068	1.20554	0.192409	1.58727	0.0277747	1.03224	0.650323	176.606	1.79825	178.683	2.60066	206.227	27.9923	176.704	1.797		1.27	concordant
Run1-Spot 179	1288.6	1396.41	57078.2	2.80881	20.2155	0.867265	0.188959	1.49026	0.0278485	1.20844	0.810893	177.069	2.11066	175.74	2.40488	157.929	20.3898	176.841	2.094		-0.821	concordant
Run1-Spot 95	949.848	1085.03	142425	1.65127	15.4019	3.24115	0.255183	3.83003	0.028521	2.04057	0.532782	181.285	3.64773	230.778	7.90654	770.792	68.2594	178.382	3.647		26.8	discord.
Run1-Spot 256	968.871	1095.09	31817.9	1.80388	19.8468	0.836542	0.199527	1.41359	0.0289217	1.1392	0.80589	183.796	2.06423	184.726	2.38751	196.649	19.4619	183.928	2.056		0.551	concordant
Run2-Spot 80	354.391	375.763	11416.2	3.89689	19.534	1.06039	0.203937	1.67075	0.0296749	0.905612	0.54204	188.514	1.68248	188.452	2.87366	187.664	32.6616	188.511	1.68		-0.0355	concordant
Run1-Spot 216	202.123	222.027	11286.3	2.38634	19.4622	1.37387	0.208068	1.70242	0.0300918	0.960567	0.564235	191.123	1.80891	191.93	2.97723	201.893	32.6531	191.153	1.807		0.461	concordant
Run1-Spot 223	158.248	168.824	19634.2	3.51631	19.0561	1.55089	0.214868	1.88052	0.0300875	0.997154	0.530253	191.096	1.87756	197.63	3.37718	276.375	36.5183	191.208	1.879		3.69	discord.
Run1-Spot 4	599.288	642.611	30447.2	3.25076	19.9193	1.10911	0.206719	1.42197	0.0301686	0.889261	0.625375	191.603	1.67878	190.796	2.4734	180.789	25.8382	191.555	1.674		-0.462	concordant
Run1-Spot 251	1314.66	1352.52	159751	8.1611	19.8176	0.738299	0.209776	1.48145	0.0301296	1.28427	0.866903	191.359	2.42145	193.365	2.60836	217.921	17.1111	191.802	2.411		1.15	concordant
Run1-Spot 300	750.569	824.707	175352	2.37912	5.31736	0.739481	5.37492	2.55688	0.206821	2.44762	0.957265	1211.86	27.0406	1880.87	21.893	2728.97	12.1751	194.9	12.72		232	discord.
Run1-Spot 288	1422.17	1518.55	142539	3.46775	19.7851	0.803911	0.223206	1.43692	0.0320143	1.19098	0.828842	203.143	2.38167	204.574	2.66238	221.078	18.5914	203.404	2.369		0.775	concordant
Run1-Spot 54	587.232	643.211	395925	2.4652	19.834	1.37464	0.2258	1.6365	0.0324988	0.887945	0.54259	206.168	1.8017	206.726	3.06091	213.109	31.8542	206.19	1.799		0.298	concordant
Run1-Spot 206	575.641	613.384	186742	3.58415	10.698	0.747344	0.712583	1.58165	0.055195	1.39387	0.881277	346.337	4.70011	546.279	6.68237	1500.73	14.1321	209.998	4.005		80.4	discord.
Run1-Spot 26	101.741	123.281	5287.12	1.10999	19.1617	1.97925	0.2467	2.25906	0.0362513	1.07823	0.477292	229.554	2.43158	223.892	4.53909	164.784	46.3837	229.314	2.424		-2.78	rev discord.
Run2-Spot 94	27.5101	29.2413	420772	3.73445	19.6217	3.48772	0.272369	3.76969	0.0388571	1.43052	0.379478	245.745	3.44926	244.586	8.1939	233.505	80.529	245.721	3.445		-0.531	concordant
Run1-Spot 100	1130.5	1265.08	107130	1.97413	19.4162	0.917926	0.286033	1.64891	0.0403944	1.36971	0.830673	255.277	3.42822	255.432	3.72386	256.874	21.1163	255.317	3.385		0.0688	concordant
Run1-Spot 234	584.875	629.21	71026.6	3.10015	8.98586	0.969113	1.13987	1.83471	0.074225	1.55781	0.849078	461.56	6.93886	772.447	9.92382	1822.02	17.586	282.246	5.979		91.6	discord.
Run2-Spot 95	707.669	726.368	240445	8.89351	10.4087	0.989195	1.06827	2.27072	0.0808384	2.04392	0.900121	501.125	9.8546	737.893	11.9093	1544.69	18.5939	289.83	8.713		83.1	discord.
Run1-Spot 221	884.799	935.566	117091	4.09571	10.8185	0.786048	0.992777	1.77565	0.0778629	1.59219	0.896677	483.354	7.41445	700.136	8.98239	1477.12	14.9083	297.902	6.786		75.7	discord.
Run2-Spot 37	604.554	702.742	59370.7	1.44691	18.875	0.991386	0.3543	1.55485	0.0488453	1.19738	0.770097	307.428	3.5947	307.95	4.13025	311.925	22.5833	307.537	3.553		0.195	concordant
Run1-Spot 258	2217.54	2389.68	454080	3.02731	16.6914	0.753518	0.422938	1.53243	0.051126	1.33436	0.870751	321.431	4.18388	358.149	4.62492	603.463	16.2847	321.695	4.404		12.7	discord.
Run1-Spot 142	811.604	1115.55	71248.9	0.627501	18.7595	0.74344	0.381957	1.53591	0.0521338	1.33802	0.871162	327.609	4.27396	328.477	4.3104	334.621	17.1062	328.013	4.157		0.318	concordant
Run1-Spot 8	748.707	812.878	167342	2.74184	18.5558	0.702991	0.42781	1.52826	0.0577147	1.35697	0.887917	361.713	4.77316	361.62	4.64954	361.007	15.8477	361.656	4.569		-0.0322	concordant
Run1-Spot 101	934.94	971.935	418711	5.93882	11.9397	0.703651	1.17999	1.91779	0.102182	1.78404	0.930255	627.181	10.6621	791.308	10.5407	1286.82	13.7006	439.1	13.32		55.2	discord.
Run1-Spot 35	198.722	232.163	30750.9	1.39648	18.0135	1.06353	0.553514	1.39477	0.0730955	0.883154	0.633191	454.778	3.87799	447.296	5.04601	408.981	24.1515	453.47	3.806		-2.02	rev discord.
Run2-Spot 77	365.93	389.015	115398	3.72497	11.7122	0.892471	0.909541	1.16784	0.077467	0.752704	0.644527	480.986	3.48863	656.814	5.64821	1319.03	17.3054	458.651	3.572		41.9	discord.
Run1-Spot 146	829.838	998.291	1.15563e+07	1.15766	17.9024	0.747716	0.57606	1.6168	0.0747349	1.43352	0.886637	464.619	6.42604	461.926	6.0005	448.537	16.633	462.465	5.941		-0.79	concordant
Run2-Spot 96	150.072	170.03	146275	1.76709	17.3198	1.08618	0.590669	1.4848	0.0744583	1.01231	0.681783	462.96	4.52228	471.295	5.59845	512.107	23.8567	464.428	4.479		2.18	concordant
Run2-Spot 86	635.415	677.218	241911	3.57199	10.1141	0.817801	1.42186	1.62393	0.104522	1.40295	0.863926	640.855	8.55845	898.144	9.68095	1598.96	15.2637	465.641	8.951		65.2	discord.
Run1-Spot 289	436.043	455.676	1.26039e+06	5.21939	11.0658	0.845208	1.13035	1.38439	0.0905037	1.09643	0.791996	558.515	5.86597	767.922	7.45864	1437.83	16.1153	489.038	6.221		48.5	discord.
Run1-Spot 120	699.356	965.864	32038.3	0.616672	5.63906	0.916852	6.20234	2.282	0.254072	2.0897	0.915729	1459.44	27.2922	2004.78	19.9565	2625.42	15.2486	503.92	20.68		160	discord.
Run1-Spot 181	1405.65	1416.18	187778	31.3659	9.92127	0.66748	1.64606	1.36769	0.118525	1.19374	0.872812	722.067	8.15439	988.041	8.63924	1637.48	12.3962	523.749	8.988		64.9	discord.		high U/Th
Run1-Spot 202	171.177	184.395	191640	3.04335	11.2697	0.927601	1.53241	2.59782	0.125085	2.42654	0.934068	759.766	17.3911	943.466	15.9631	1400.96	17.7763	524.78	26.25		57.9	discord.
Run1-Spot 78	476.105	500.991	216434	4.49584	10.0593	0.757287	1.4909	1.36063	0.108606	1.13039	0.830789	664.648	7.13879	926.682	8.26932	1615.89	14.1013	532.911	7.716		58.6	discord.
Run1-Spot 91	434.09	436.696	1.07512e+06	39.1537	17.039	0.946265	0.706397	1.44958	0.0873389	1.09812	0.757544	539.78	5.68608	542.604	6.09322	554.466	20.6358	540.783	5.505		0.657	concordant		high U/Th
Run2-Spot 11	403.526	443.596	123238	2.36657	16.5778	0.97348	0.779759	1.45227	0.0942973	1.077	0.741599	580.902	5.98272	585.346	6.46075	602.602	21.0721	582.446	5.791		0.971	concordant
Run1-Spot 176	502.269	555.225	170303	2.22888	16.2049	0.683394	0.849346	1.16222	0.0999877	0.939974	0.808771	614.337	5.50799	624.29	5.41989	660.512	14.6361	619.598	5.257		2.1	concordant
Run1-Spot 72	272.718	278.784	153633	10.5653	10.3687	1.19339	1.47997	1.81434	0.111333	1.36661	0.75323	680.486	8.8256	922.217	10.9944	1555.78	22.3977	623.054	9.605		47.4	discord.		high U/Th
Run1-Spot 144	1417.21	1627.03	140764	1.58728	16.0493	0.801494	0.881314	1.60495	0.102668	1.39048	0.866371	630.027	8.34592	641.692	7.63427	682.991	17.0957	639.5	7.735		2.56	concordant
Run1-Spot 236	256.699	280.701	248101	2.51327	8.21321	0.786291	2.553	1.33444	0.151756	1.07817	0.807961	910.8	9.15783	1287.3	9.73636	1985.84	13.9925	720.23	10.32		70.1	discord.
Run1-Spot 184	1364.16	1409.95	1.05778e+06	7.00033	8.76032	0.88088	2.71024	1.54458	0.172155	1.26877	0.821434	1023.98	12.0126	1331.26	11.4568	1866.94	15.8961	941.56	16.86		49.1	discord.
Run1-Spot 44	273.982	321.715	568713	1.34889	11.3427	0.953659	1.87496	1.39673	0.154571	1.02048	0.730622	926.535	8.80704	1072.28	9.24939	1381.93	18.3218	957.789	9.563		21.7	discord.
Run1-Spot 246	577.89	616.245	1.10759e+06	3.54073	12.9827	0.752508	1.87362	1.25274	0.175896	1.00154	0.799482	1044.52	9.65773	1071.81	8.29377	1127.76	15.0102	1067.56	8.475		3.83	discord.
Run1-Spot 143	1102.34	1145.97	656407	5.9372	12.9802	0.812176	1.85948	1.87206	0.174986	1.68671	0.900989	1039.52	16.1931	1066.8	12.3616	1123.01	16.2112	1081.08	11.91		4.74	discord.
Run1-Spot 135	931.559	964.81	3.51687e+06	6.58392	11.3923	0.753324	1.96086	1.53005	0.161845	1.33174	0.870395	967.021	11.9589	1102.18	10.2891	1379.65	14.4774	1096.01	12.9		19.8	discord.
Run1-Spot 52	435.226	451.278	149645	6.37134	10.0418	0.683312	2.36417	1.20023	0.17236	0.986572	0.821987	1025.1	9.35025	1231.84	8.56456	1614.38	12.7299	1101.74	12.15		27.7	discord.
Run2-Spot 69	749.602	799.009	1.52645e+06	3.56549	12.9987	0.612836	1.96675	1.35456	0.185774	1.208	0.891803	1098.44	12.2003	1104.2	9.1182	1115.57	12.2286	1106.96	8.703		0.944	concordant
Run1-Spot 303	259.797	290.292	405331	2.00205	10.8216	0.95874	2.55129	1.26172	0.199792	0.820222	0.650079	1174.2	8.80483	1286.81	9.20408	1480.01	18.1766	1211.94	8.86		14.3	discord.
Run2-Spot 54	189.549	205.829	353410	2.73605	10.0084	1.76268	2.81875	2.02062	0.20506	0.987866	0.488892	1202.45	10.8365	1360.53	15.1455	1618.39	32.8154	1220.28	11.06		20.9	discord.
Run1-Spot 41	247.474	270.669	125166	2.5072	12.0077	0.671999	2.36237	1.144	0.206643	0.92553	0.809028	1210.91	10.2177	1231.3	8.16147	1267.17	13.1108	1231.68	8.288		2.6	concordant
Run1-Spot 197	300.952	329.95	27302.2	2.43894	8.78087	3.5719	3.47232	3.94416	0.221771	1.65832	0.420449	1291.23	19.4045	1520.95	31.1033	1857.09	64.6772	1303.98	19.93		29.6	discord.
Run1-Spot 64	314.304	418.61	504582	0.708118	10.8325	0.75937	2.71543	1.22359	0.212971	0.959439	0.784118	1244.62	10.8594	1332.69	9.08044	1477.11	14.4023	1318.62	9.832		10.4	discord.
Run1-Spot 233	302.81	332.052	299874	2.43345	10.1456	0.770229	2.76241	1.33301	0.202859	1.08796	0.816162	1190.66	11.8279	1345.44	9.93804	1600.88	14.3718	1320.88	12		18.6	discord.
Run1-Spot 240	1476.43	1497.71	261909	16.304	9.61321	0.842206	2.74285	1.64218	0.190718	1.40977	0.858471	1125.26	14.5562	1340.15	12.22	1702.1	15.5106	1326.68	17.74		26.9	discord.		high U/Th
Run2-Spot 85	285.22	316.8	906962	2.12243	11.5349	0.531672	2.71976	0.830702	0.227754	0.63827	0.768351	1322.72	7.63268	1333.87	6.16731	1351.8	10.2579	1332.95	6.206		1.3	concordant
Run2-Spot 92	151.738	171.221	47741.5	1.83026	11.2707	0.699511	2.79279	1.00686	0.229457	0.724131	0.719198	1331.65	8.7121	1353.61	7.52811	1388.45	13.4282	1347.88	7.494		2.5	concordant
Run1-Spot 103	154.478	178.585	129506	1.50587	11.3362	0.908188	2.78692	1.35844	0.22943	1.01018	0.743635	1331.51	12.1524	1352.04	10.1513	1384.64	17.4426	1348.38	10.21		2.34	concordant
Run1-Spot 274	1671.29	1872.57	398774	1.95124	11.3698	0.700595	2.78264	1.29007	0.229013	1.08325	0.839683	1329.32	13.0122	1350.89	9.6365	1385.18	13.4541	1356.12	9.578		2.68	concordant
Run1-Spot 277	474.83	523.349	163117	2.29979	11.4192	0.784563	2.83518	1.25017	0.234643	0.973237	0.778481	1358.79	11.9235	1364.89	9.38443	1374.45	15.0924	1364.78	9.422		0.701	concordant
Run1-Spot 38	187.648	215.829	977253	1.5648	11.4998	0.89696	2.84027	1.3779	0.237443	1.04598	0.759111	1373.39	12.9383	1366.24	10.3481	1355.05	17.2986	1366.77	10.28		-0.81	concordant
Run1-Spot 229	472.167	479.488	127620	15.1559	10.5822	0.614233	2.73394	1.20736	0.209598	1.03938	0.860872	1226.68	11.6102	1337.73	8.97632	1520.14	11.5831	1367.67	9.548		14.4	discord.		high U/Th
Run1-Spot 90	541.416	561.804	403346	6.24056	11.4429	0.875617	2.84574	1.40418	0.236325	1.09772	0.781756	1367.56	13.5266	1367.69	10.5507	1367.86	16.8563	1367.69	10.55		0.0141	concordant
Run1-Spot 31	106.657	122.21	33465.8	1.61149	11.3694	0.832293	2.85887	1.18501	0.236969	0.842396	0.710874	1370.92	10.4032	1371.15	8.91453	1371.48	16.0364	1371.09	8.73		0.0253	concordant
Run1-Spot 203	638.816	726.891	176912	1.70446	11.6469	0.701189	2.86456	1.07277	0.241674	0.811849	0.756778	1395.39	10.1863	1372.64	8.07427	1337.4	13.5569	1374	7.946		-2.56	rev discord.
Run1-Spot 104	382.223	402.236	149846	4.48817	11.065	0.829633	2.92745	1.16122	0.235188	0.812483	0.699678	1361.63	9.97277	1389.03	8.78892	1431.36	15.8324	1380.52	8.695		3.06	concordant
Run1-Spot 268	402.808	442.583	901212	2.37988	11.36	0.681773	2.90881	1.2178	0.239092	1.00907	0.8286	1381.97	12.5516	1384.2	9.20213	1387.63	13.088	1384.69	9.08		0.267	concordant
Run1-Spot 222	131.835	156.546	267357	1.25376	11.1937	1.09367	2.91216	1.83415	0.236153	1.4724	0.802772	1366.67	18.1329	1385.07	13.864	1413.53	20.9218	1386.53	13.99		2.13	concordant
Run1-Spot 278	234.799	260.536	184573	2.1439	10.8158	0.703101	2.98813	1.07178	0.234016	0.808816	0.754645	1355.51	9.88766	1404.6	8.15411	1479.88	13.3325	1396.99	8.427		5.49	discord.
Run1-Spot 157	1079.55	1092.91	243696	18.9971	11.0445	0.586723	2.85372	1.43768	0.227821	1.31247	0.912909	1323.07	15.6988	1369.79	10.8103	1443.41	11.1799	1404.04	9.299		6.91	discord.		high U/Th
Run1-Spot 217	280.885	302.249	275286	3.08968	11.1865	0.625605	2.98769	1.092	0.242203	0.894999	0.819594	1398.14	11.2494	1404.49	8.30765	1414.13	11.9675	1405.63	8.251		0.743	concordant
Run1-Spot 259	496.697	552.566	569744	2.08925	11.281	0.797084	2.99846	1.28963	0.244911	1.01381	0.786121	1412.18	12.8572	1407.23	9.8201	1399.72	15.2766	1407	9.785		-0.558	concordant
Run1-Spot 292	623.509	723.067	381067	1.47175	10.4313	1.08451	2.3796	3.04111	0.179641	2.84116	0.934251	1065.01	27.8915	1236.49	21.7454	1549.17	20.3732	1409.48	17.68		31.7	discord.
Run1-Spot 77	1396.42	1440.46	297567	7.45143	10.8709	0.947407	2.92809	1.96672	0.230479	1.72349	0.876325	1337.01	20.8106	1389.2	14.887	1470.27	17.9852	1413.39	14.25		6.85	discord.
Run1-Spot 228	164.058	190.586	68739.1	1.45331	11.0529	0.859357	3.03171	1.35814	0.243249	1.05074	0.77366	1403.57	13.2528	1415.64	10.3703	1433.83	16.4161	1415.39	10.45		1.34	concordant
Run1-Spot 218	156.797	182.016	233618	1.46113	11.1026	0.854035	3.04671	1.26085	0.245169	0.927553	0.735659	1413.51	11.7732	1419.41	9.63904	1428.24	16.3047	1418.53	9.606		0.644	concordant
Run2-Spot 44	159.3	173.079	91566.5	2.71679	10.2185	0.929197	3.2016	1.26586	0.238022	0.85919	0.678738	1376.41	10.6487	1457.55	9.79451	1577.87	17.3962	1422.7	9.917		9	discord.
Run1-Spot 22	210.287	243.909	108703	1.46983	10.8337	0.738221	3.15378	1.26301	0.248745	1.02394	0.810714	1432	13.1485	1445.92	9.73732	1466.44	14.044	1448	9.737		1.57	concordant
Run1-Spot 215	338.705	362.014	124600	3.41485	11.1828	0.75296	3.16697	1.16246	0.256826	0.885398	0.761662	1473.58	11.6633	1449.14	8.97101	1413.45	14.4093	1449.34	8.844		-2.64	rev discord.
Run1-Spot 296	707.795	787.372	2.30391e+07	2.09019	10.0189	0.708229	3.06965	1.33361	0.222534	1.13001	0.847333	1295.25	13.2598	1425.15	10.2142	1624.88	13.172	1452.55	11.09		15.7	discord.
Run1-Spot 166	173.534	210.617	4.35954e+06	1.09968	10.889	0.809321	3.18576	1.43878	0.251103	1.18957	0.826793	1444.16	15.3911	1453.71	11.1194	1467.68	15.369	1455.92	10.97		1.1	concordant
Run1-Spot 118	446.7	461.582	234962	7.05395	10.6881	0.746892	3.07564	1.79568	0.238139	1.63297	0.909388	1377.01	20.2469	1426.64	13.7602	1501.47	14.1198	1461.94	11.81		6.99	discord.
Run1-Spot 115	310.371	338.869	204590	2.55944	10.9682	0.861701	3.2237	1.37918	0.256205	1.07678	0.780742	1470.4	14.1571	1462.87	10.6888	1451.95	16.4001	1462.49	10.63		-0.818	concordant
Run1-Spot 29	264.591	327.327	139192	0.991128	10.8423	0.787414	3.22907	1.19946	0.25431	0.904726	0.754278	1460.66	11.8248	1464.16	9.29952	1469.23	14.9518	1463.95	9.309		0.375	concordant
Run1-Spot 139	449.976	523.171	152902	1.44469	9.63811	0.703154	3.04863	1.42143	0.213147	1.23522	0.868994	1245.56	13.9903	1419.89	10.8685	1691.97	12.9696	1476.18	12.08		22.1	discord.
Run1-Spot 254	296.703	310.561	161331	5.0312	10.6203	0.885977	3.30445	1.41977	0.253991	1.10932	0.781339	1459.03	14.4844	1482.1	11.0674	1515.27	16.7187	1482.78	11.22		2.49	concordant
Run2-Spot 90	666.378	917.345	336686	0.623981	10.5897	0.820639	3.25064	1.66668	0.25016	1.45065	0.870381	1439.3	18.7126	1469.33	12.9426	1512.98	15.4884	1483.1	12.19		3.7	discord.
Run1-Spot 255	724.081	842.039	325881	1.44254	10.7188	0.746345	3.28224	1.51962	0.25471	1.32371	0.871078	1462.72	17.3227	1476.85	11.8273	1497.2	14.1174	1483.47	11.05		1.73	concordant
Run1-Spot 299	127.523	148.215	443536	1.44824	10.5859	0.825438	3.35502	1.21301	0.257071	0.888847	0.732761	1474.84	11.7176	1493.96	9.48883	1521.19	15.562	1491.28	9.552		2.01	concordant
Run1-Spot 295	136.154	149.959	173650	2.31778	9.25548	0.673791	3.43978	1.15892	0.230532	0.942901	0.8136	1337.29	11.3874	1513.54	9.11729	1769.61	12.3046	1508.03	10.89		19.4	discord.
Run1-Spot 132	278.741	319.953	127778	1.58946	10.5239	0.694699	3.41198	1.23778	0.260074	1.02413	0.827391	1490.22	13.6262	1507.16	9.71984	1531.03	13.0887	1511.38	9.584		1.89	concordant
Run2-Spot 79	623.583	637.742	2.53054e+06	10.3495	9.97891	0.820676	3.34717	1.50579	0.242562	1.2625	0.838428	1400	15.8875	1492.13	11.773	1625.58	15.2623	1514.45	12.14		10.6	discord.		high U/Th
Run1-Spot 282	818.752	918.658	1.11493e+06	1.92588	10.4431	0.777548	3.4817	1.56481	0.263054	1.35796	0.86781	1505.45	18.2318	1523.08	12.3442	1547.64	14.6094	1531.19	11.53		2.09	concordant
Run1-Spot 275	219.218	253.465	427555	1.50428	10.3369	0.660049	3.54493	1.08943	0.265407	0.866717	0.795567	1517.45	11.7187	1537.3	8.62822	1564.71	12.3723	1539.61	8.673		2.11	concordant
Run2-Spot 36	389.066	435.12	167661	1.98527	10.6843	0.781852	3.6121	1.23359	0.280822	0.954022	0.773372	1595.5	13.484	1552.2	9.81012	1493.73	14.7992	1548.43	9.596		-4.45	rev discord.
Run1-Spot 310	90.2209	103.246	111083	1.62783	10.3974	1.08996	3.61208	1.40288	0.271953	0.882826	0.629295	1550.71	12.1679	1552.2	11.1565	1554.2	20.4678	1551.62	10.47		0.153	concordant
Run1-Spot 171	131.05	164.832	72362.9	0.911637	9.99654	0.854754	3.69635	1.22712	0.268491	0.880417	0.717465	1533.14	12.013	1570.58	9.80717	1621.25	15.906	1563.88	9.964		3.8	discord.
Run1-Spot 6	778.483	869.642	224833	2.00687	9.84202	0.850129	3.63769	1.41873	0.26003	1.13579	0.800568	1490	15.1098	1557.82	11.2998	1651	15.7591	1564.73	11.7		7.19	discord.
Run1-Spot 125	23.1201	51.6544	236402	0.19041	10.266	1.23536	3.68651	1.70267	0.274662	1.17174	0.688176	1564.42	16.2762	1568.45	13.6005	1573.86	23.1306	1567.54	13.36		0.406	concordant
Run1-Spot 165	208.532	234.702	95483.6	1.87261	9.66839	0.73919	3.77841	1.03828	0.264789	0.728818	0.701949	1514.3	9.83603	1588.17	8.3364	1687.66	13.6452	1567.98	8.634		7.54	discord.
Run1-Spot 86	833.974	873.397	250420	4.97132	10.2995	0.668717	3.74009	3.38603	0.279497	3.31933	0.980301	1588.83	46.7428	1579.99	27.1344	1568.2	12.5301	1569.62	12.22		-1.37	concordant
Run1-Spot 285	1190.28	1210.8	2.97865e+06	13.6302	10.0805	0.739927	3.63926	1.41698	0.265267	1.20844	0.852832	1516.73	16.3323	1558.16	11.2869	1614.77	13.7796	1573.99	10.86		4.71	discord.		high U/Th
Run2-Spot 19	812.601	857.216	192598	4.28022	9.81817	0.725339	3.44623	1.63127	0.246343	1.46113	0.895705	1419.59	18.6171	1515.01	12.839	1651.02	13.445	1574.95	11.4		12.3	discord.
Run1-Spot 9	319.651	437.391	133184	0.637995	10.1047	0.684853	3.7641	1.12836	0.277124	0.896544	0.794558	1576.86	12.541	1585.12	9.05249	1596.12	12.7914	1586.28	9.021		0.854	concordant
Run1-Spot 59	235.995	295.323	309048	0.934771	9.98089	0.724347	3.67908	1.4625	0.266055	1.27052	0.86873	1520.75	17.2115	1566.84	11.6768	1629.49	13.464	1588.51	10.9		5.38	discord.
Run1-Spot 137	235.656	273.543	3.37824e+11	1.46169	10.0387	0.698263	3.77596	1.27656	0.274617	1.06866	0.837141	1564.19	14.8425	1587.65	10.2483	1618.92	12.9966	1595.12	9.951		2.55	concordant
Run1-Spot 175	199.124	222.182	124375	2.02941	10.0284	0.793888	3.81989	1.19734	0.278215	0.896244	0.748531	1582.37	12.5754	1596.95	9.63549	1616.22	14.7831	1596.44	9.715		1.46	concordant
Run1-Spot 51	627.019	961.1	2.46922e+06	0.44106	10.0829	0.717967	3.83943	1.61685	0.280817	1.4487	0.896001	1595.48	20.4755	1601.05	13.0256	1608.38	13.3816	1604.54	11.22		0.672	concordant
Run1-Spot 145	314.857	369.963	96769.4	1.34272	9.89151	0.684187	3.89461	1.12644	0.279557	0.894481	0.794079	1589.13	12.598	1612.57	9.10112	1643.28	12.7052	1615.78	9.134		2.39	concordant
Run1-Spot 20	217.304	254.36	404159	1.37809	9.95437	0.89943	3.93116	1.40146	0.284594	1.07476	0.766886	1614.46	15.3494	1620.12	11.3449	1627.47	16.7232	1620.4	11.37		0.564	concordant
Run1-Spot 186	263.333	281.283	597545	3.44754	9.62233	0.836824	3.89918	1.38151	0.272035	1.09923	0.795669	1551.12	15.1542	1613.51	11.1648	1695.89	15.4235	1620.49	11.48		6.4	discord.
Run1-Spot 108	883.184	911.992	824019	7.20435	10.1299	0.617559	4.01833	1.24615	0.295015	1.08237	0.868566	1666.54	15.895	1637.91	10.1322	1601.34	11.5221	1623.96	9.217		-3.17	rev discord.
Run1-Spot 201	134.176	154.614	444754	1.54281	10.0099	1.08676	3.95196	1.55943	0.286375	1.11838	0.717173	1623.39	16.0501	1624.39	12.6373	1625.68	20.2113	1624.28	12.58		0.0983	concordant
Run1-Spot 110	347.008	403.636	483751	1.44005	10.0728	0.862261	3.97318	1.47398	0.289891	1.19545	0.811038	1640.98	17.3194	1628.74	11.9576	1612.94	16.0621	1625.88	11.67		-1.26	concordant
Run1-Spot 19	595.103	649.237	512385	2.58337	9.54061	0.761825	3.99241	1.16311	0.276991	0.878888	0.755636	1576.19	12.2894	1632.65	9.4447	1706.16	14.0228	1630.52	9.785		5.6	discord.
Run1-Spot 219	234.57	271.767	82982.6	1.48195	9.99326	0.654929	3.98646	1.05849	0.288912	0.831541	0.785592	1636.09	12.0156	1631.44	8.59254	1625.44	12.1798	1630.84	8.521		-0.465	concordant
Run1-Spot 105	1830.47	1839.84	5.49337e+06	45.894	8.96797	0.880672	4.11861	1.33189	0.26757	0.999177	0.750193	1528.45	13.5965	1658	10.8821	1826.24	15.971	1639.08	12.03		12.9	discord.		high U/Th
Run2-Spot 91	148.567	166.375	120722	1.96057	9.74145	0.841519	4.08401	1.09453	0.289381	0.699549	0.639134	1638.43	10.121	1651.12	8.92787	1667.27	15.5716	1646.85	8.583		1.25	concordant
Run1-Spot 220	332.341	361.227	73800.9	2.70378	9.68261	0.785485	4.0495	1.30736	0.284398	1.04507	0.799375	1613.47	14.9173	1644.2	10.6462	1683.69	14.5015	1649.28	10.67		3.1	concordant
Run1-Spot 149	531.292	671.717	239559	0.889113	9.85397	0.732498	4.07943	1.16363	0.291154	0.90414	0.776999	1647.29	13.1432	1650.2	9.48947	1653.88	13.5729	1650.49	9.465		0.286	concordant
Run1-Spot 273	430.501	452.609	239011	4.57602	9.33585	0.833252	3.64253	1.907	0.246188	1.71531	0.89948	1418.79	21.8447	1558.88	15.1937	1754.19	15.2463	1652.37	13.18		18	discord.
Run1-Spot 225	439.986	489.062	1.68795e+06	2.10689	9.67385	0.73926	4.07647	1.24231	0.285667	0.99841	0.803674	1619.84	14.3008	1649.61	10.1297	1687.72	13.6408	1655.14	10.12		3.01	concordant
Run1-Spot 3	266.693	300.501	117062	1.8538	9.87048	0.866913	4.13809	1.41334	0.296719	1.11581	0.789481	1675.02	16.4591	1661.86	11.5583	1645.26	16.0936	1659.76	11.39		-1.3	concordant
Run1-Spot 266	1055.52	1216.05	345271	1.54525	9.75555	0.756426	4.07903	1.58479	0.287995	1.39261	0.878734	1631.5	20.0734	1650.12	12.9241	1673.89	13.9807	1660.15	11.55		2.11	concordant
Run1-Spot 11	434.68	456.171	214240	4.75326	9.63309	0.738537	4.12756	1.32575	0.289198	1.10099	0.830463	1637.52	15.9212	1659.78	10.8365	1688.04	13.627	1666.65	10.51		2.31	concordant
Run1-Spot 136	490.255	533.337	185122	2.67416	9.42013	0.774285	4.23096	1.12503	0.288948	0.816104	0.725403	1636.27	11.7937	1680.05	9.23986	1735.14	14.2022	1675.25	9.466		4.21	discord.
Run1-Spot 53	36.867	43.6317	119209	1.28073	9.63773	0.898325	3.97197	2.96059	0.27789	2.82099	0.95285	1580.73	39.5462	1628.49	24.0196	1690.73	16.5687	1675.46	14.86		6.64	discord.
Run1-Spot 192	440.008	469.667	329062	3.48639	9.42322	0.753307	4.21345	1.14443	0.28804	0.861528	0.752802	1631.73	12.4197	1676.64	9.39168	1733.31	13.8188	1675.93	9.64		4.35	discord.
Run1-Spot 121	486.262	526.76	1.42882e+06	2.82165	9.61362	0.802553	4.18149	1.39256	0.291404	1.13804	0.817228	1648.54	16.5542	1670.4	11.4114	1697.96	14.7878	1675.96	11.21		2.22	concordant
Run1-Spot 65	97.2637	109.833	104686	1.81852	9.63523	0.815693	4.20321	1.29638	0.293365	1.00758	0.777221	1658.32	14.7328	1674.65	10.6338	1695.15	15.0359	1676.26	10.67		1.59	concordant
Run1-Spot 155	468.943	510.816	187536	2.63182	9.58303	0.67382	4.15334	1.25965	0.287717	1.0642	0.844842	1630.11	15.3281	1664.87	10.3086	1708.97	12.4003	1677.81	9.851		3.68	discord.
Run2-Spot 60	387.152	411.607	805748	3.72033	9.35377	0.7679	4.24751	1.15981	0.288766	0.869187	0.749422	1635.36	12.5546	1683.25	9.53257	1743.45	14.0686	1681.89	9.805		4.62	discord.
Run2-Spot 49	253.316	308.458	240688	1.07958	9.62382	0.525422	4.24762	0.881263	0.297287	0.707454	0.802773	1677.84	10.451	1683.28	7.24313	1690.04	9.69331	1684.4	7.136		0.539	concordant
Run1-Spot 182	568.523	583.365	775070	9.00154	9.41898	0.791306	4.31577	1.08429	0.294859	0.741302	0.683673	1665.76	10.8819	1696.38	8.93882	1734.4	14.5138	1689.7	8.959		2.92	concordant
Run1-Spot 162	526.021	558.333	912104	3.82575	9.23414	0.699734	4.28914	1.12754	0.28642	0.884151	0.78414	1623.62	12.6901	1691.28	9.28453	1776.2	12.7674	1697.5	9.578		6.63	discord.
Run1-Spot 10	495.869	554.62	180065	1.98347	9.51435	0.821694	4.33512	1.17006	0.300029	0.83283	0.711781	1691.45	12.3904	1700.07	9.65406	1710.69	15.1193	1699.14	9.658		0.813	concordant
Run1-Spot 62	3535.74	4071.97	1.66316e+06	1.54952	9.12798	0.609361	4.03307	1.25015	0.266664	1.09158	0.873162	1523.84	14.8142	1640.89	10.1721	1794.26	11.0953	1699.81	9.465		13.4	discord.
Run1-Spot 71	1187.71	1243.01	364271	5.04684	9.09112	0.78348	4.11459	1.52877	0.271289	1.31275	0.858692	1547.34	18.0588	1657.2	12.4885	1799.39	14.2568	1703.63	12.02		12.1	discord.
Run1-Spot 284	257.872	298.053	86914.3	1.50818	9.26199	0.888125	4.41911	1.19715	0.296356	0.801582	0.669576	1673.21	11.8129	1715.93	9.91285	1768.44	16.2402	1704.6	9.941		4.07	discord.
Run1-Spot 37	143.781	155.524	147247	2.87726	9.4907	0.897665	4.40214	1.19689	0.303937	0.791618	0.661396	1710.8	11.8949	1712.74	9.90366	1715.1	16.5058	1712.27	9.667		0.183	concordant
Run1-Spot 190	1373.33	1487.27	2.50971e+06	2.83259	9.48517	0.619013	4.37806	1.16841	0.301159	0.990957	0.848127	1697.05	14.7856	1708.21	9.65813	1721.9	11.3728	1712.68	9.066		1.16	concordant
Run2-Spot 59	443.398	484.926	752422	2.50909	9.44482	0.578946	4.4221	0.936526	0.303566	0.736141	0.786033	1708.97	11.0509	1716.49	7.75567	1725.66	10.6317	1717.63	7.706		0.723	concordant
Run2-Spot 72	188.903	207.137	4.5758e+06	2.43452	9.32109	0.69691	4.43604	1.02394	0.300284	0.750173	0.732637	1692.72	11.168	1719.1	8.48448	1751.36	12.7552	1717.75	8.605		2.48	concordant
Run1-Spot 244	782.335	965.245	198269	1.00513	9.50663	0.627608	4.42435	1.29997	0.304288	1.13843	0.875738	1712.54	17.1214	1716.91	10.7667	1722.23	11.5303	1719.22	9.576		0.473	concordant
Run1-Spot 39	1195.35	1367.22	359703	1.63441	9.33989	0.715247	4.37389	1.5005	0.297437	1.31905	0.879077	1678.59	19.4935	1707.42	12.4013	1742.96	13.1047	1723.16	10.97		3.17	concordant
Run1-Spot 32	458.043	495.44	172331	2.87826	9.30326	0.718383	4.43752	1.21425	0.299772	0.978858	0.806144	1690.18	14.5533	1719.37	10.0621	1755.09	13.1442	1725.77	9.967		2.86	concordant
Run1-Spot 196	93.7048	103.096	129882	2.34479	9.41085	0.946727	4.47963	1.37551	0.305598	0.997867	0.725451	1719.01	15.0568	1727.2	11.4184	1737.14	17.3591	1726.76	11.46		0.764	concordant
Run1-Spot 253	345.727	366.228	216974	3.96313	9.20149	0.769508	4.45738	1.39164	0.29674	1.1595	0.833188	1675.12	17.1046	1723.07	11.5417	1781.81	14.032	1738.85	11.18		4.86	discord.
Run1-Spot 141	731.064	808.008	306342	2.23277	9.20072	0.824879	4.42807	1.65206	0.295407	1.43138	0.866421	1668.49	21.0421	1717.61	13.6852	1777.99	15.0482	1741.41	12.49		5.26	discord.
Run1-Spot 131	322.838	357.825	92093.9	2.16844	9.21959	0.907385	4.5418	1.51291	0.303354	1.21043	0.800067	1707.92	18.1613	1738.66	12.5905	1775.83	16.5618	1744.8	12.52		2.97	concordant
Run1-Spot 40	353.697	383.634	7.22126e+06	2.77647	9.35445	0.686022	4.59876	1.42792	0.312964	1.25233	0.877031	1755.28	19.2433	1749.04	11.9098	1741.59	12.5712	1745.7	10.51		-0.663	concordant
Run1-Spot 207	385.528	420.276	253740	2.60729	9.32622	0.718364	4.57813	1.46374	0.309048	1.27533	0.871281	1736.02	19.4094	1745.3	12.1987	1756.41	13.1417	1750.03	10.91		0.982	concordant
Run1-Spot 69	568.634	654.126	1.49858e+06	1.56307	9.36275	0.574782	4.68134	0.981285	0.317189	0.795327	0.810496	1775.99	12.3462	1763.91	8.21021	1749.62	10.5219	1760.71	7.949		-1.16	concordant
Run1-Spot 151	401.055	474.206	157432	1.2884	9.16324	0.550633	4.65869	0.916727	0.30926	0.732926	0.799503	1737.06	11.1603	1759.85	7.66348	1787	10.0333	1764.59	7.584		2.18	concordant
Run1-Spot 272	929.252	1059.43	662401	1.67752	9.24498	0.788814	4.66079	1.48382	0.311656	1.25678	0.846989	1748.85	19.2502	1760.23	12.4056	1773.75	14.3975	1764.84	11.59		1.15	concordant
Run1-Spot 93	1041.99	1117.57	380691	3.24019	9.21825	0.546518	4.61325	1.3188	0.308219	1.20023	0.910093	1731.94	18.2291	1751.67	11.0058	1775.28	9.97251	1765.46	8.741		2.25	concordant
Run1-Spot 231	282.432	296.997	211290	4.55671	9.22765	0.762287	4.69168	1.33814	0.313474	1.09977	0.821869	1757.78	16.9201	1765.76	11.2005	1775.19	13.9111	1768.18	10.8		0.776	concordant
Run1-Spot 257	324.448	357.514	206575	2.30583	9.09853	0.685251	4.71416	1.1093	0.310575	0.872277	0.78633	1743.53	13.3253	1769.76	9.29274	1800.83	12.4686	1773.92	9.285		2.47	concordant
Run1-Spot 84	674.817	702.733	294220	5.68068	9.14543	0.707526	4.70423	1.42884	0.311698	1.24136	0.868789	1749.06	19.016	1767.99	11.9654	1790.42	12.8872	1777.49	10.73		1.98	concordant
Run1-Spot 172	774.958	851.436	364059	2.38127	9.17278	0.70299	4.75023	1.23676	0.316115	1.01754	0.822742	1770.73	15.7551	1776.15	10.3743	1782.51	12.8169	1777.83	9.974		0.525	concordant
Run1-Spot 185	595.276	627.216	507772	4.3798	9.11692	0.707066	4.7954	1.37154	0.316997	1.17523	0.856872	1775.05	18.2353	1784.09	11.5239	1794.68	12.8738	1788.17	10.55		0.916	concordant
Run1-Spot 138	792.552	831.6	424538	4.76985	9.04994	0.586751	4.73049	1.18879	0.31004	1.03389	0.869702	1740.9	15.7735	1772.66	9.96465	1810.25	10.6609	1788.74	8.92		3.32	concordant
Run2-Spot 29	320.175	346.023	408658	2.91097	9.01718	0.60697	4.799	1.14283	0.314861	0.968316	0.847297	1764.58	14.9477	1784.72	9.60334	1808.34	11.0309	1792.97	8.956		2.01	concordant
Run1-Spot 269	199.575	219.192	167112	2.3908	9.00062	0.768594	4.82647	1.49658	0.314495	1.28408	0.85801	1762.79	19.8047	1789.52	12.5886	1820.81	13.9492	1801.7	11.52		2.71	concordant
Run2-Spot 9	1180.49	1194.75	1.03691e+06	19.4536	8.77856	0.755499	4.83081	1.6452	0.308515	1.46148	0.888326	1733.39	22.2131	1790.28	13.841	1857.2	13.6492	1824.29	11.72		6.12	discord.		high U/Th
Run1-Spot 183	1443.91	1578.6	49821.4	2.51939	8.62649	0.805366	5.03202	1.38246	0.315551	1.12335	0.812576	1767.97	17.3699	1824.73	11.7107	1890.13	14.5001	1839.7	11.54		5.35	discord.
Run1-Spot 133	246.519	267.059	119401	2.82037	8.74965	0.743563	5.21629	1.13797	0.330829	0.861446	0.757002	1842.4	13.8047	1855.28	9.69626	1869.74	13.4152	1856.41	9.712		1.14	concordant
Run1-Spot 167	142.949	162.685	74741.1	1.70212	8.74182	0.746151	5.24094	1.21022	0.332147	0.952631	0.787157	1848.78	15.3116	1859.3	10.3197	1871.07	13.4642	1861.34	10.18		0.948	concordant
Run2-Spot 107	1616.05	1727.67	1.61466e+06	3.40231	8.34083	0.640325	4.71927	1.43669	0.285411	1.28611	0.895186	1618.55	18.4088	1770.67	12.0378	1955.06	11.4338	1869.85	9.895		17.1	discord.
Run1-Spot 128	1012.78	1104.57	1.09471e+06	2.59285	8.69817	0.716296	5.2707	1.53397	0.332011	1.35646	0.884281	1848.12	21.7958	1864.13	13.0926	1882.01	12.9022	1873.3	11.12		1.63	concordant
Run2-Spot 103	2696.83	2736.79	729252	15.8583	7.79876	0.714528	4.1629	1.71605	0.235569	1.56021	0.909191	1363.62	19.1758	1666.75	14.0504	2072.97	12.5865	1908.37	10.78		39.1	discord.		high U/Th
Run2-Spot 43	478.824	584.779	185582	1.062	6.63178	0.953386	6.2621	1.41389	0.301776	1.04408	0.738444	1700.11	15.6027	2013.17	12.3801	2351.59	16.2933	1924.75	17.16		28.3	discord.
Run1-Spot 293	487.247	536.891	310322	2.30648	8.23611	0.703005	5.90965	1.18904	0.352238	0.958955	0.806492	1945.27	16.1027	1962.65	10.3264	1981.01	12.5175	1967.56	9.966		1.52	concordant
Run1-Spot 111	442.984	490.24	189813	2.20294	8.06592	0.601448	5.96922	1.14425	0.348851	0.973434	0.850716	1929.11	16.2294	1971.37	9.95174	2016	10.6657	1990.1	9.012		3.89	discord.
Run1-Spot 45	287.552	331.051	803929	1.55347	6.3413	0.738468	8.64834	1.17716	0.398524	0.916722	0.778755	2162.24	16.84	2301.66	10.7143	2427.8	12.5205	2332.66	10.7		10.6	discord.
Run1-Spot 85	126.293	143.759	196537	1.69925	6.10411	0.761469	10.5051	1.09859	0.46457	0.791857	0.720795	2459.7	16.1922	2480.37	10.1857	2497.33	12.8204	2482.79	10.14		1.42	concordant
Run1-Spot 124	504.55	581.112	2.60896e+06	1.54866	5.9951	0.813541	10.5553	1.33835	0.458942	1.0627	0.794037	2434.88	21.5501	2484.79	12.414	2525.84	13.6614	2499.94	11.66		3.53	concordant
Run1-Spot 304	435.445	448.755	237372	7.68843	5.64061	0.886724	11.1888	1.35634	0.45667	1.02634	0.756695	2424.84	20.742	2538.99	12.6428	2631.48	14.7351	2561.89	12.52		7.83	discord.
Run1-Spot 267	197.217	232.18	195967	1.32555	5.8935	0.621071	11.6671	1.66597	0.497627	1.54586	0.927906	2603.59	33.1125	2578.07	15.5817	2558.05	10.3937	2562.23	10.03		-1.96	rev discord.
Run2-Spot 76	151.699	164.355	171897	2.81684	5.48115	0.575522	13.2562	1.0552	0.527831	0.884421	0.838151	2732.31	19.6969	2698.07	9.96313	2672.5	9.52877	2683.99	8.592		-2.29	rev discord.
Run1-Spot 265	82.8538	103.391	51578.2	0.948088	5.13788	0.865493	14.761	1.42227	0.54931	1.12859	0.793517	2822.3	25.7951	2799.96	13.526	2783.89	14.1791	2792.85	12.41		-1.4	concordant
Run1-Spot 238	145.534	169.838	1.64249e+06	1.40722	3.78748	0.841715	23.6511	1.42174	0.648218	1.1458	0.805915	3221.24	29.0495	3254.12	13.8514	3274.43	13.2292	3265.39	12.02		1.83	concordant
Run1-Spot 308	474.979	535.078	626751	1.85728	3.51138	0.778348	25.737	1.06753	0.653771	0.730609	0.684393	3242.92	18.6189	3336.6	10.4345	3393.35	12.1217	3348.27	10.4		5	discord.

## Sheet: 18COA-2
Aliquot Name	18COA-2
Stratigraphic Formation Name	lower Empire Fm
Stratigraphic Age	Miocene-Plio?
Rock Type	sandstone
Mineral	Zircon
Method	U-Pb
Latitude	43.3611
Longitude	-124.305
Internal Uncertainty Level	one sigma
External Uncertainty 206/238 (% two sigma)	1.1752
External Uncertainty 206/207 (% two sigma)	0.807571
Analysis Purpose	DZ
Laboratory Name	Arizona LaserChron Center
Analyst Name	M. Darin
Aliquot Reference
Aliquot Instrumental Method	LA-ICPMS
Aliquot Instrumental Reference	Gehrels, G.E., Valencia, V., Ruiz, J., 2008, Enhanced precision, accuracy, efficiency, and spatial resolution of U-Pb ages by laser ablation-multicollector-inductively coupled plasma-mass spectrometry: Geochemistry, Geophysics, Geosystems, v. 9, Q03017, doi:10.1029/2007GC001805.
	Gehrels, G. and Pecha, M., 2014, Detrital zircon U-Pb geochronology and Hf isotope geochemistry of Paleozoic and Triassic passive margin strata of western North America: Geosphere, v. 10 (1), p. 49-65.
								Isotope ratios						Apparent ages (Ma)				Best Age
Analysis	U	eU	206Pb	U/Th	206Pb*	±	207Pb*	±	206Pb*	±	error	206Pb*	±	207Pb*	±	206Pb*	±	Concordia Age	±1σ	within 10% of YSCG (*)	Discordance (dc)	Concordance	Age Class	Notes
	(ppm)	(ppm)	204Pb		207Pb*	(%)	235U	(%)	238U	(%)	corr.	238U	(Ma)	235U	(Ma)	207Pb*	(Ma)	(Ma)	(Ma)		(%)
Spot 9	712.093	778.252	14686.3	2.52937	21.4277	2.83229	0.0172016	3.1757	0.00275801	1.22433	0.38553	17.7548	0.217078	17.3176	0.545294	NA	NA	17.752	0.217	YSCG	-2.51	rev discord.	Y	YSCG
Spot 282	194.752	216.385	4470.31	2.11566	18.4132	3.58361	0.0257969	4.05331	0.00368641	1.86552	0.460247	23.7205	0.441697	25.8616	1.03501	229.607	83.1537	23.681	0.441		8.75	discord.	S
Spot 145	402.027	457.406	56184.3	1.70602	19.7104	2.92511	0.0269453	3.3057	0.00389701	1.53972	0.465778	25.0729	0.385304	26.9977	0.880705	201.868	67.8983	25.042	0.385		7.49	discord.	S
Spot 94	288.744	337.384	50206.7	1.39504	19.9021	2.96761	0.0293316	3.25478	0.00429373	1.33667	0.41068	27.6199	0.368398	29.3544	0.941742	173.684	69.2661	27.603	0.368		6.18	discord.	S
Spot 55	710.666	801.935	12359.2	1.82983	20.4347	1.38759	0.0339633	1.71533	0.00520525	0.98667	0.575208	33.4682	0.329365	33.9131	0.572114	65.5209	33.4023	33.468	0.329		1.34	concordant	S
Spot 48	122.129	136.05	9732.57	2.06174	19.8528	3.97147	0.0364711	4.17037	0.00545794	1.27044	0.304634	35.0885	0.444566	36.3728	1.49003	122	93.6132	35.086	0.445		3.66	concordant	S
Spot 118	539.831	595.403	29486.3	2.2828	20.7241	2.53406	0.035816	2.864	0.00548141	1.33304	0.465446	35.2389	0.468468	35.7308	1.00554	68.9237	60.2964	35.239	0.468		1.41	concordant	S
Spot 68	129.641	140.611	9413.61	2.77734	19.9406	3.74719	0.0413566	3.98681	0.00622657	1.35133	0.338951	40.0146	0.539055	41.1477	1.60768	107.747	88.6201	40.013	0.539		2.85	concordant	S
Spot 241	580.322	632.166	11595.5	2.63046	19.0482	1.7056	0.0444991	2.23648	0.00635261	1.17973	0.527495	40.822	0.480068	44.2072	0.967472	231.927	43.893	40.746	0.48		8.14	discord.	D	does not overlap concordia within 2σ
Spot 131	376.896	425.092	7780.17	1.83774	19.9202	1.67793	0.0425163	2.88029	0.00643883	1.27167	0.441507	41.3743	0.524459	42.2778	1.19272	93.8386	61.2262	41.373	0.525		2.21	concordant	S
Spot 223	1965.25	2227.31	47283.4	1.76233	20.7559	0.975102	0.0440161	1.54295	0.00674126	1.18809	0.770011	43.3112	0.512849	43.7376	0.66052	67.1619	23.4281	43.316	0.513		1	concordant	P	high eU
Spot 169	721.633	816.654	23554	1.78469	20.9261	1.55921	0.0435753	2.03636	0.00675142	1.28416	0.630617	43.3762	0.55515	43.3087	0.863376	39.5975	37.8126	43.375	0.555		-0.159	concordant	S
Spot 27	2034.23	2314.42	73106.5	1.70609	20.3546	1.16095	0.0452276	1.61268	0.00676296	1.11921	0.694006	43.4501	0.484661	44.9151	0.708549	123.835	27.3362	43.429	0.485		3.39	concordant	P	high eU
Spot 146	1369.37	1392.69	112126	13.7981	21.0491	0.989319	0.0454561	1.59731	0.00700382	1.25385	0.784977	44.9922	0.56217	45.137	0.705187	52.8568	23.6068	44.996	0.562		0.329	concordant	M	high U/Th, high eU
Spot 53	1759.56	2103.52	34764.9	1.20217	20.8674	0.966827	0.0457454	1.51436	0.00704707	1.15041	0.759665	45.269	0.518954	45.418	0.672637	53.2677	23.5009	45.272	0.519		0.336	concordant	P	high eU
Spot 177	114.709	125.752	3538.96	2.44092	19.7732	3.257	0.0450445	3.57324	0.00709159	1.40519	0.393254	45.554	0.637865	44.7372	1.56387	1.17129	NA	45.548	0.638		-1.85	rev discord.	S	YC2σ
Spot 192	329.383	358.594	5899.68	2.64983	21.1417	1.93363	0.0434985	3.57814	0.00709811	1.08358	0.302832	45.5957	0.492322	43.234	1.5145	NA	NA	45.576	0.492		-5.44	rev discord.	S	YC2σ
Spot 119	331.213	361.008	16833.5	2.61235	19.1101	1.92461	0.0502372	2.29034	0.00713779	1.22233	0.533687	45.8497	0.558445	49.7701	1.11242	242.924	44.6252	45.757	0.558		8.41	discord.	D	does not overlap concordia within 2σ
Spot 1	497.662	570.803	36861.4	1.59896	20.5617	1.97987	0.0470348	2.35576	0.00712947	1.27639	0.541816	45.7965	0.58247	46.6692	1.07453	91.7373	46.9281	45.796	0.583		1.93	concordant	S	YC2σ
Spot 50	1865.29	1981.9	66386.2	3.75907	21.0636	1.05719	0.0460812	1.51937	0.00713305	1.07981	0.710698	45.8193	0.493008	45.744	0.679596	41.7994	25.5745	45.818	0.493		-0.168	concordant	P	high eU
Spot 167	98.6916	117.859	4054.2	1.20999	20.2542	3.50133	0.0451664	4.27623	0.00721022	1.61577	0.377848	46.3133	0.745633	44.8556	1.87638	NA	NA	46.3	0.745		-3.27	rev discord.	S	YC2σ
Spot 8	203.161	232.334	3116.35	1.63654	16.2033	2.68175	0.0564206	3.58532	0.00723372	1.11192	0.310132	46.4637	0.514783	55.7307	1.94428	474.732	75.4056	46.335	0.514		18.7	discord.	D	does not overlap concordia within 2σ
Spot 188	330.536	375.492	12403.5	1.72783	19.0927	1.78806	0.0506274	2.13792	0.00723295	0.860111	0.402312	46.4588	0.39816	50.1472	1.04606	230.175	45.2072	46.42	0.398		7.82	discord.	D	does not overlap concordia within 2σ
Spot 309	663.042	693.52	14892.4	5.11231	20.7084	1.48701	0.0470222	1.97653	0.00724201	1.29504	0.655208	46.5168	0.600241	46.6569	0.90132	53.8485	35.6283	46.518	0.6		0.308	concordant	S	YC2σ
Spot 133	636.027	865.89	24970	0.650241	20.5953	1.10019	0.047518	1.72404	0.00724476	1.32082	0.766117	46.5344	0.61242	47.1377	0.794097	77.9121	26.3176	46.54	0.613		1.32	concordant	S	YC2σ
Spot 172	190.437	225.393	3913.36	1.28025	19.8361	2.11725	0.0465449	2.77641	0.00729272	1.19791	0.431459	46.8413	0.559082	46.194	1.2538	12.696	NA	46.836	0.559		-1.42	concordant	S	YC2σ
Spot 87	641.59	732.461	654325	1.6592	20.3333	1.54175	0.0490867	1.99809	0.00730141	1.27097	0.636092	46.8969	0.593881	48.6571	0.949286	136.242	36.2122	46.876	0.594		3.77	discord.	D	does not overlap concordia within 2σ
Spot 212	1564	1729.11	73255.6	2.22606	20.8478	1.39157	0.0476442	1.83674	0.00731119	1.19818	0.65234	46.9595	0.560615	47.26	0.848153	62.552	33.1747	46.962	0.561		0.653	concordant	P	high eU
Spot 206	102.052	125.964	5589.06	1.00296	18.3052	3.66249	0.0519679	3.97946	0.00732327	1.26074	0.316812	47.0368	0.590854	51.442	1.99612	261.78	86.7244	47.005	0.591		9.17	discord.	S	YC2σ
Spot 51	266.435	301.037	12169.4	1.80951	20.1795	2.32946	0.0485282	2.59479	0.00734514	1.13311	0.436688	47.1768	0.532615	48.1164	1.2194	95.2137	55.2717	47.177	0.533		2.02	concordant	S	YC2σ
Spot 301	321.745	353.226	11375.7	2.40173	20.1563	1.83135	0.0488096	2.04707	0.00735605	0.901549	0.440409	47.2466	0.424394	48.3889	0.967324	105.333	43.4318	47.245	0.424		2.45	concordant	S	YC2σ
Spot 251	53.3657	76.8968	3249.35	0.53295	11.9413	10.4893	0.080581	10.7398	0.00741835	2.29535	0.213723	47.6453	1.0896	78.691	8.13229	1166.63	208.372	47.288	1.086		51.7	discord.	D	does not overlap concordia within 2σ
Spot 246	210.338	235.748	9814.92	1.94531	19.3829	2.66518	0.0506447	3.04156	0.007384	1.38523	0.455433	47.4254	0.654539	50.1639	1.48869	183.027	63.1089	47.4	0.655		5.75	discord.	S	YC2σ
Spot 158	361.932	428.282	174587	1.28192	20.4573	1.68907	0.0496402	2.01773	0.00741564	1.10339	0.54685	47.6279	0.523588	49.1927	0.968916	126.148	39.7463	47.619	0.524		3.31	concordant	S
Spot 261	409.01	460.984	10075.5	1.84934	20.2183	1.73012	0.0487435	2.53722	0.00741788	1.05388	0.41537	47.6422	0.500243	48.3249	1.19739	82.2997	54.787	47.643	0.5		1.46	concordant	S
Spot 69	133.329	143.732	16632.5	3.01187	17.0337	3.99477	0.0590509	4.1529	0.0074687	1.13359	0.272964	47.9674	0.541737	58.2557	2.35121	504.731	87.9564	47.853	0.541		19.9	discord.	D	does not overlap concordia within 2σ
Spot 65	239.39	280.863	5095.53	1.35646	19.7958	2.20251	0.0485476	2.68601	0.00745169	1.10913	0.41293	47.8586	0.52885	48.1352	1.26275	61.9091	58.2657	47.859	0.529		0.59	concordant	S
Spot 156	319.279	363.506	6462.58	1.69648	21.8435	2.17641	0.0446309	2.42459	0.00747962	1.04325	0.430279	48.0373	0.499286	44.3353	1.05182	NA	NA	47.938	0.498		-8.2	rev discord.	D	does not overlap concordia within 2σ
Spot 42	250.585	274.334	12774.4	2.47958	20.7169	2.33933	0.0481599	2.62795	0.0074735	1.12462	0.427945	47.9981	0.537791	47.7597	1.22604	35.7849	NA	47.997	0.538		-0.51	concordant	S
Spot 120	702.073	791.639	77095.8	1.84206	20.1416	1.15111	0.0509187	1.6437	0.00752686	1.16961	0.71157	48.3396	0.56327	50.4287	0.808651	150.879	27.0633	48.291	0.564		4.34	discord.
Spot 92	208.75	244.457	9171.14	1.37382	19.0251	2.93875	0.052415	3.22257	0.00752311	1.01411	0.314688	48.3156	0.48814	51.8734	1.62968	219.472	70.7994	48.296	0.488		7.28	discord.
Spot 82	369.603	399.242	12352.2	2.93044	15.634	3.57952	0.0647494	3.70442	0.00754996	0.920328	0.248441	48.4874	0.444569	63.7046	2.28738	680.969	76.6733	48.31	0.444		28.1	discord.
Spot 232	526.847	584.187	172588	2.15919	20.3983	1.98561	0.0504341	2.27716	0.00753312	1.11478	0.489549	48.3796	0.537309	49.9604	1.11015	126.499	46.7442	48.373	0.537		3.29	concordant
Spot 137	458.555	515.618	23466.9	1.88848	20.5179	1.94651	0.04964	2.27135	0.00753969	1.166	0.513349	48.4216	0.562479	49.1926	1.0907	86.9465	46.2132	48.423	0.563		1.62	concordant
Spot 260	345.948	427.373	31918.4	0.998439	19.4508	1.76915	0.0526743	1.88832	0.00755107	0.660134	0.349587	48.4944	0.318927	52.1235	0.959424	222.313	40.9205	48.469	0.319		7.4	discord.
Spot 26	1019.12	1193.52	25223.5	1.3732	20.7937	1.08533	0.049018	1.47749	0.00754902	0.998054	0.675504	48.4813	0.482055	48.5907	0.701017	53.9969	25.9859	48.483	0.482		0.231	concordant
Spot 132	197.896	221.762	19979.9	1.94862	19.8977	1.86871	0.0511212	2.15711	0.00755188	1.06256	0.492584	48.4996	0.513405	50.6243	1.06525	152.394	43.9862	48.484	0.513		4.39	discord.
Spot 81	435.74	509.102	69482.2	1.3958	20.5723	1.84567	0.050203	2.09097	0.00759482	0.982544	0.469898	48.7743	0.477421	49.737	1.01493	96.3757	43.6837	48.774	0.477		2	concordant
Spot 219	134.689	147.664	4568.97	2.43943	20.4019	3.1158	0.0474673	3.31815	0.00759922	1.09494	0.329984	48.8025	0.53234	47.0886	1.5268	NA	NA	48.79	0.532		-3.66	rev discord.
Spot 6	395.427	435.58	9327.15	2.31429	20.4363	2.29596	0.0493425	2.68252	0.00762022	0.942978	0.351527	48.9369	0.459717	48.9046	1.28079	47.3212	NA	48.937	0.46		-0.0675	concordant
Spot 299	1798.37	2258.95	74531.9	0.917569	20.8422	1.09319	0.0500321	1.63618	0.00763255	1.21445	0.742248	49.0158	0.593015	49.5717	0.791603	76.5174	26.0303	49.022	0.593		1.16	concordant
Spot 163	334.411	419.684	34504.2	0.921588	18.0656	2.70707	0.0578456	2.93493	0.00768169	1.13268	0.385932	49.3301	0.556622	57.0995	1.62958	396.479	60.7171	49.184	0.556		15	discord.
Spot 252	818.112	867.994	55269.3	3.85421	21.0257	1.31959	0.0495686	1.91188	0.00765942	1.36409	0.713479	49.1877	0.668409	49.1235	0.916825	45.9877	32.0099	49.186	0.668		-0.134	concordant
Spot 71	607.927	673.243	35919.2	2.18724	20.9902	1.82238	0.0497202	2.12882	0.00769741	1.03002	0.483847	49.4307	0.5072	49.2701	1.02383	41.4901	NA	49.429	0.507		-0.333	concordant
Spot 264	129.351	156.398	5900.74	1.12386	19.81	2.15506	0.0509898	3.24113	0.00776088	1.24943	0.385491	49.8367	0.620272	50.4974	1.59666	81.9495	70.9916	49.838	0.62		1.35	concordant
Spot 30	840.564	946.477	17086.9	1.86505	20.7331	1.53899	0.0509653	1.86739	0.00787549	1.05687	0.565961	50.5698	0.532367	50.4738	0.919501	45.9182	36.7784	50.569	0.532		-0.195	concordant
Spot 101	198.35	213.172	79871	3.14484	18.9411	2.52611	0.0633518	2.7941	0.00880932	1.19393	0.427304	56.5398	0.672094	62.3709	1.69026	292.292	57.7	56.45	0.672		10.1	discord.
Spot 168	343.459	402.054	58954.1	1.37748	19.6218	1.83791	0.0636541	2.16609	0.0091744	1.14527	0.528728	58.8723	0.671178	62.6596	1.31623	209.862	42.6447	58.817	0.671		6.43	discord.
Spot 198	1019.14	1108.96	125923	2.66629	20.722	1.26056	0.0639	1.65351	0.0097147	1.06999	0.647102	62.3228	0.663634	62.8943	1.00841	84.6742	29.8953	62.33	0.664		0.941	concordant
Spot 209	1432.04	1545.51	144240	2.96595	20.7528	1.12317	0.0646788	2.47772	0.00985945	2.20837	0.891289	63.2468	1.38989	63.6373	1.52836	78.3257	26.6645	63.277	1.39		0.636	concordant
Spot 254	641.518	662.801	54574.1	7.08357	20.6303	0.9719	0.0653698	1.56326	0.00990402	1.22274	0.78217	63.5313	0.773006	64.2961	0.973955	92.8542	23.0687	63.548	0.773		1.23	concordant
Spot 19	153.06	165.545	15090.4	2.88084	21.0133	2.18193	0.0651863	2.48968	0.010222	1.17948	0.473746	65.5605	0.769352	64.1211	1.54705	10.6986	NA	65.538	0.769		-2.29	rev discord.
Spot 199	527.311	552.826	26405.4	4.85669	20.3913	1.50543	0.0696724	1.92362	0.0105092	1.19424	0.62083	67.3933	0.800647	68.3885	1.27221	103.351	35.6513	67.401	0.801		1.52	concordant
Spot 25	4098.77	4157.85	180520	16.3023	20.8384	0.480763	0.0706886	0.995676	0.0107954	0.871577	0.875361	69.2186	0.600066	69.3526	0.667474	73.9558	11.4492	69.231	0.599		0.2	concordant		high U/Th
Spot 213	147.463	171.916	5898.02	1.41721	20.723	2.12589	0.0698168	4.1885	0.011182	2.34112	0.55894	71.6837	1.66891	68.5256	2.77549	NA	NA	71.562	1.665		-4.66	rev discord.
Spot 259	180.477	191.375	22030.4	3.89163	20.0272	2.24348	0.0767548	2.53676	0.0113729	1.17956	0.464985	72.9008	0.855063	75.0893	1.83611	145.304	52.664	72.9	0.855		3.07	concordant
Spot 23	967.9	1001.97	44094.9	6.67574	20.3138	1.13384	0.0761857	1.62942	0.0113887	1.16941	0.71768	73.0014	0.848867	74.5525	1.17125	124.552	26.7026	73.015	0.849		2.18	concordant
Spot 303	71.435	78.8172	5911.66	2.27403	20.1485	3.05763	0.0742385	3.30664	0.0114691	1.23839	0.374516	73.5141	0.905219	72.7137	2.32031	46.4544	NA	73.508	0.905		-1.13	concordant
Spot 228	208.254	256.477	59654.5	1.01488	12.5965	6.01796	0.126196	6.2789	0.011667	1.79018	0.285111	74.7749	1.33087	120.674	7.14419	1158.24	119.471	73.811	1.324		50.2	discord.
Spot 57	536.313	579.788	48483.9	2.89895	20.3798	1.13939	0.0772474	1.72315	0.011591	1.29247	0.750066	74.2905	0.954673	75.5537	1.25464	115.711	26.8671	74.312	0.955		1.75	concordant
Spot 135	1619.44	1746.27	86151.2	3.00057	20.7411	0.883586	0.0776642	1.62766	0.0118126	1.36626	0.839403	75.7028	1.02825	75.9466	1.19105	83.6012	20.9934	75.72	1.028		0.334	concordant
Spot 297	363.477	406.512	39051.7	1.98484	20.3904	1.48472	0.0790087	1.72593	0.0118342	0.876667	0.50794	75.84	0.660968	77.2125	1.28322	119.921	35.0392	75.846	0.661		1.86	concordant
Spot 83	1570.07	1615.18	55708.7	8.18003	20.7173	0.83912	0.0776447	1.52777	0.011835	1.27567	0.834993	75.8453	0.961868	75.9281	1.11769	78.5154	19.9617	75.851	0.961		0.113	concordant
Spot 277	155.516	171.33	8671.04	2.31105	20.1967	2.29605	0.077802	3.11009	0.0118535	1.10717	0.355994	75.9634	0.83611	76.0763	2.27958	79.6028	69.0315	75.964	0.836		0.154	concordant
Spot 72	194.03	209.494	238402	2.94862	20.6415	1.74691	0.07954	2.05193	0.0120376	1.07643	0.524597	77.1359	0.825369	77.7123	1.53511	95.4793	41.3765	77.141	0.825		0.773	concordant
Spot 38	176.815	191.453	13627.7	2.83855	11.3461	10.0097	0.144574	10.184	0.0121417	1.8358	0.180264	77.7991	1.41965	137.11	13.0622	1346.22	193.893	77.299	1.416		59.7	discord.
Spot 189	276.086	287.834	136281	5.52253	20.2908	2.25001	0.0842964	2.45556	0.0125226	0.983468	0.400507	80.2245	0.784093	82.1763	1.93839	139.273	52.8431	80.228	0.784		2.5	concordant
Spot 216	272.2	288.814	13074.4	3.85037	20.6862	1.56287	0.082484	1.82815	0.0128118	0.921058	0.503819	82.0658	0.751083	80.4776	1.41446	33.5951	NA	82.034	0.751		-2.03	rev discord.
Spot 31	231.263	246.478	19675.7	3.57189	20.3282	2.33809	0.0867012	2.97823	0.0131001	1.67462	0.562286	83.9001	1.3959	84.4258	2.41271	99.3224	58.2688	83.907	1.396		0.651	concordant
Spot 255	4818.02	4907.81	147663	12.6101	20.7168	0.640173	0.0864771	1.30351	0.0131052	1.13545	0.871068	83.9325	0.946832	84.2163	1.05348	92.2563	15.1897	83.961	0.946		0.352	concordant		high U/Th
Spot 279	351.228	369.494	182270	4.51863	17.6922	1.9913	0.105826	3.45622	0.0136655	2.8249	0.81734	87.4971	2.45501	102.14	3.35845	458.878	44.1672	84.428	2.443		16.7	discord.
Spot 104	58.8026	65.4889	9055.93	2.06673	19.0506	3.64819	0.0920579	4.07081	0.0132409	1.54543	0.379636	84.7964	1.30188	89.4186	3.4844	214.594	87.2404	84.781	1.302		5.54	discord.
Spot 286	395.024	457.165	18962.4	1.49388	20.0553	1.45514	0.0892781	1.57382	0.0132603	0.590711	0.375336	84.9196	0.49834	86.8306	1.30976	139.675	34.255	84.923	0.498		2.32	concordant
Spot 204	305.297	336.233	24035.2	2.31912	20.266	1.48898	0.0883163	1.74021	0.0132784	0.871364	0.500724	85.0349	0.736098	85.9337	1.4339	110.957	35.5842	85.042	0.736		1.1	concordant
Spot 113	611.096	693.759	175491	1.73725	19.8433	1.29878	0.0924984	1.71946	0.0134394	1.12681	0.655327	86.059	0.963275	89.8281	1.47821	191.176	30.2245	86.033	0.964		4.48	discord.
Spot 11	706.264	759.563	29639	3.11399	20.7644	0.939489	0.0877885	1.51156	0.0134687	1.18189	0.781901	86.2455	1.01254	85.4412	1.23865	62.9982	22.4452	86.185	1.01		-0.977	concordant
Spot 45	125.904	135.939	18242.5	2.94825	20.2684	2.43561	0.0906334	2.67689	0.0136551	1.05878	0.395527	87.4309	0.919453	88.0932	2.25876	106.055	58.0884	87.434	0.919		0.788	concordant
Spot 166	475.141	501.449	31929.2	4.24427	20.0703	1.27162	0.0925671	1.7719	0.0136868	1.22597	0.691892	87.6321	1.06707	89.8919	1.52433	150.286	29.9774	87.652	1.068		2.66	concordant
Spot 105	687.116	772.071	47950.9	1.9007	20.5674	1.19886	0.0905059	1.58748	0.0136961	1.00047	0.630227	87.6915	0.871388	87.9745	1.33779	95.6645	29.1702	87.698	0.871		0.336	concordant
Spot 193	774.639	857.384	16144.7	2.20002	19.7998	1.23933	0.0931536	1.83896	0.0137278	1.35827	0.738605	87.8933	1.18573	90.4369	1.59119	158.062	28.9895	87.913	1.187		2.98	concordant
Spot 111	621.148	709.56	42857.4	1.651	20.2411	1.28485	0.0925441	1.82555	0.0137901	1.29085	0.707104	88.2895	1.13192	89.8705	1.57012	132.041	30.3351	88.318	1.132		1.85	concordant
Spot 281	181.515	184.206	8169.79	15.8557	17.3692	2.44382	0.106388	3.2655	0.0139038	1.80288	0.5521	89.0124	1.59376	102.656	3.18834	432.209	60.6933	88.439	1.593		15	discord.		high U/Th
Spot 21	507.468	532.444	30175.3	4.77488	20.38	1.4699	0.0919009	1.99782	0.0138268	1.3098	0.655613	88.5225	1.15154	89.2726	1.70735	109.394	35.6204	88.539	1.151		0.881	concordant
Spot 60	906.261	1034.86	48707.6	1.65608	20.5387	1.01831	0.0919683	1.52814	0.0139016	1.11587	0.730216	88.9984	0.986283	89.3352	1.30683	98.3669	24.6959	89.012	0.986		0.394	concordant
Spot 275	814.853	1002.56	19298.4	1.02014	19.1118	1.39318	0.0990427	1.82168	0.0139917	1.17301	0.643913	89.5714	1.04341	95.8923	1.66691	256.112	32.0398	89.424	1.045		7.14	discord.
Spot 237	292.197	329.279	5315.82	1.85176	19.5769	1.30578	0.093315	1.73855	0.0141293	1.14614	0.65925	90.446	1.0294	90.5868	1.50669	94.2943	30.9343	90.45	1.029		0.162	concordant
Spot 99	154.315	175.354	52642	1.72361	19.8614	1.96072	0.0966925	2.17376	0.0141329	0.922842	0.424537	90.4685	0.82905	93.7187	1.94603	177.235	45.8908	90.469	0.829		3.69	discord.
Spot 235	480.828	531.386	22719.5	2.23493	20.3215	1.08037	0.0945413	1.61715	0.0142403	1.19779	0.740683	91.1515	1.08412	91.725	1.4183	106.693	25.6696	91.174	1.084		0.655	concordant
Spot 290	343.6	396.46	7652.1	1.52753	20.0767	1.75674	0.0939244	2.13353	0.0143052	1.07119	0.502076	91.5641	0.973895	91.1525	1.86003	80.3689	43.8098	91.558	0.974		-0.471	concordant
Spot 211	875.771	1022.43	28733.4	1.40333	19.9873	0.877796	0.0968857	1.35351	0.0143409	1.0277	0.759285	91.7905	0.936646	93.8975	1.21392	147.739	20.6295	91.832	0.938		2.37	concordant
Spot 37	654.195	728.484	29039.1	2.06943	19.6875	1.27926	0.0999594	1.6965	0.0145414	1.10639	0.65216	93.0651	1.02227	96.7388	1.56542	188.25	29.9308	93.059	1.023		4.06	discord.
Spot 298	660.6	693.087	21816.9	4.77857	20.458	1.31157	0.0965917	1.74948	0.014606	1.14573	0.654897	93.4751	1.06325	93.6253	1.56471	97.4316	31.3028	93.479	1.063		0.168	concordant
Spot 272	480.073	546.329	15032.1	1.70273	20.3412	1.5125	0.0975617	2.01291	0.014749	1.31086	0.651228	94.384	1.22823	94.5231	1.81679	98.0589	36.1402	94.388	1.228		0.154	concordant
Spot 180	620.575	650.074	51234.5	4.94365	20.5362	1.2452	0.0976769	1.81265	0.0147496	1.2998	0.717073	94.3873	1.21791	94.6297	1.63781	100.753	29.8651	94.397	1.217		0.268	concordant
Spot 130	209.777	227.669	505741	2.75532	20.0075	1.73274	0.101129	2.04189	0.01481	1.08025	0.529042	94.7715	1.01628	97.8182	1.90415	172.713	40.4654	94.778	1.017		3.32	concordant
Spot 306	696.32	770.459	183261	2.20716	20.3002	1.19166	0.100355	1.63356	0.0148643	1.11733	0.683989	95.116	1.05496	97.104	1.51276	146.224	27.9372	95.147	1.056		2.17	concordant
Spot 16	268.99	288.834	152949	3.18546	20.6129	1.52763	0.098696	1.80388	0.0148906	0.959234	0.531763	95.2832	0.907267	95.5719	1.64535	102.792	36.1309	95.287	0.907		0.317	concordant
Spot 305	568.537	622.621	21067.4	2.47035	14.5254	4.77281	0.140627	4.94423	0.0150286	1.27014	0.256894	96.16	1.21231	133.603	6.18957	864.471	99.1656	95.637	1.21		34.8	discord.
Spot 123	74.8382	88.5235	10151	1.28509	16.5104	4.28785	0.121154	4.67597	0.0149893	1.41736	0.303115	95.9102	1.34933	116.118	5.13073	553.05	97.2866	95.648	1.349		20.1	discord.
Spot 285	847.636	934.322	30940.3	2.29787	20.6417	0.940351	0.0992991	1.49377	0.015079	1.15695	0.774517	96.4797	1.10791	96.1291	1.37007	87.4638	22.3936	96.455	1.106		-0.381	concordant
Spot 78	922.687	1021.8	52612.8	2.18769	21.0992	0.824593	0.0977105	1.57881	0.0151868	1.34074	0.849209	97.1646	1.29295	94.6608	1.42696	32.0155	19.9605	96.692	1.281		-2.76	rev discord.
Spot 214	364.287	380.315	19684.7	5.34114	20.0853	1.19679	0.101886	1.47285	0.0152358	0.805853	0.54714	97.4756	0.779601	98.5158	1.38282	123.742	29.0182	97.489	0.78		1.11	concordant
Spot 274	663.108	713.47	57647.9	3.09423	20.3466	1.0742	0.102541	1.71408	0.0152797	1.3345	0.778548	97.754	1.29468	99.1191	1.61869	132.055	25.2784	97.81	1.295		1.45	concordant
Spot 218	716.27	794.699	23696.2	2.14618	20.2369	0.958194	0.103097	1.45821	0.0154821	1.09873	0.753477	99.039	1.07985	99.6314	1.38384	113.84	22.6024	99.067	1.079		0.626	concordant
Spot 203	535.179	588.654	73400.6	2.35193	20.6081	1.20933	0.102246	1.71372	0.0154922	1.21418	0.708509	99.1032	1.19409	98.8474	1.61412	92.6718	28.6411	99.091	1.193		-0.271	concordant
Spot 243	173.24	201.44	36160.4	1.44367	19.7731	2.02023	0.106522	2.33626	0.0155182	1.15564	0.494656	99.2684	1.1384	102.779	2.28366	184.944	47.2821	99.273	1.139		3.65	concordant
Spot 63	311.939	337.226	88264.2	2.89895	19.9539	1.30756	0.105915	1.65288	0.0155226	1.01079	0.611535	99.2961	0.995988	102.221	1.60733	170.946	30.5329	99.314	0.997		3.05	concordant
Spot 284	938.255	1085.86	195363	1.49383	20.5338	1.17489	0.103952	1.61666	0.0155819	1.11033	0.686805	99.6726	1.09819	100.418	1.54573	118.174	27.7255	99.696	1.098		0.782	concordant
Spot 95	288.422	305.133	195114	4.05589	20.0509	1.66035	0.106253	1.91221	0.0156022	0.948558	0.496054	99.802	0.939389	102.532	1.86488	166.433	38.7757	99.813	0.94		2.83	concordant
Spot 52	409.776	436.91	17581.2	3.54892	20.1359	1.29746	0.104753	1.52162	0.0156989	0.792936	0.521113	100.415	0.79006	101.155	1.46501	118.592	30.6067	100.425	0.79		0.77	concordant
Spot 139	188.421	203.942	26559.4	2.85279	19.259	2.02567	0.111729	2.31126	0.0158725	0.974004	0.421416	101.517	0.981036	107.546	2.35857	243.241	48.2866	101.493	0.982		6.07	discord.
Spot 266	1093.22	1244.26	882386	1.70089	20.5245	0.946132	0.10621	1.61568	0.0159104	1.30967	0.810603	101.758	1.32223	102.493	1.57512	119.614	22.304	101.808	1.322		0.756	concordant
Spot 88	804.113	996.691	62934	0.981244	20.3845	0.873059	0.106259	1.40742	0.015914	1.0937	0.777096	101.78	1.10443	102.537	1.37266	120.178	20.862	101.822	1.104		0.778	concordant
Spot 181	462.819	535.573	54619.9	1.49494	19.8578	1.46955	0.10948	2.0148	0.0159768	1.37318	0.681547	102.179	1.39204	105.49	2.01873	180.908	34.3456	102.203	1.394		3.35	concordant
Spot 67	1005.29	1171.02	58151.9	1.42545	20.3557	0.964393	0.107259	1.43891	0.0160406	1.04874	0.728839	102.584	1.06732	103.455	1.4153	123.546	23.2035	102.618	1.067		0.888	concordant
Spot 236	237.392	261.638	271090	2.30088	19.7109	1.4843	0.111516	1.67801	0.0160948	0.782657	0.466421	102.927	0.799171	107.351	1.7094	206.646	34.445	102.925	0.8		4.43	discord.
Spot 291	352.804	399.924	30188.2	1.75954	19.9267	1.60834	0.1098	2.14749	0.0161122	1.33574	0.621999	103.038	1.36538	105.782	2.15734	168.014	39.2723	103.064	1.366		2.77	concordant
Spot 59	456.034	540.312	18632.1	1.27161	19.9786	1.11234	0.109288	1.48309	0.0162254	0.941766	0.635004	103.756	0.969317	105.314	1.48363	140.724	26.8881	103.785	0.97		1.57	concordant
Spot 77	709.325	719.835	78658	15.8599	17.1723	1.59408	0.134138	2.0257	0.0169217	1.24808	0.616124	108.172	1.3388	127.809	2.43271	510.431	35.0709	106.857	1.338		17.8	discord.		high U/Th
Spot 5	532.702	587.437	114144	2.28711	19.6648	1.10584	0.117506	1.58947	0.0169397	1.14161	0.718235	108.286	1.22588	112.808	1.69704	209.334	25.663	108.292	1.228		4.32	discord.
Spot 122	42.7431	46.8334	4323.81	2.4557	20.4226	3.16493	0.105605	3.4407	0.0169647	1.26934	0.368919	108.444	1.36501	101.937	3.33706	NA	NA	108.312	1.363		-6.51	rev discord.
Spot 128	315.551	346.481	103790	2.39754	20.5659	1.36605	0.11351	1.53972	0.0171372	0.710366	0.461362	109.537	0.771543	109.171	1.59372	101.166	32.3255	109.532	0.771		-0.353	concordant
Spot 288	518.574	590.394	198561	1.69681	19.8501	1.08749	0.118981	1.48454	0.0172441	1.01054	0.680707	110.215	1.1043	114.148	1.6028	196.934	25.2798	110.244	1.106		3.7	discord.
Spot 24	141.257	153.463	4490.49	2.71958	20.039	2.2414	0.111452	2.49143	0.0174757	0.987388	0.396314	111.683	1.09324	107.293	2.53675	10.9191	NA	111.601	1.092		-4.23	rev discord.
Spot 268	449.031	467.888	33975.4	5.59612	20.6122	1.43187	0.116362	1.91839	0.0176328	1.27222	0.663175	112.678	1.42106	111.769	2.03036	92.4728	34.014	112.635	1.419		-0.854	concordant
Spot 12	263.042	286.364	157808	2.65044	20.0066	1.31697	0.121728	1.6903	0.0178415	1.0592	0.626632	114	1.19687	116.637	1.8625	170.769	30.7641	114.04	1.198		2.42	concordant
Spot 231	152.857	165.368	82794.3	2.87122	20.3304	1.99176	0.121201	2.20862	0.018077	0.954291	0.432075	115.491	1.0923	116.16	2.42424	129.891	46.8594	115.498	1.092		0.611	concordant
Spot 185	188.755	212.292	15195.6	1.88454	20.1725	1.8484	0.120352	2.11163	0.0181099	1.01481	0.480581	115.699	1.16365	115.391	2.30328	109.041	43.7381	115.694	1.163		-0.282	concordant
Spot 142	168.179	190.535	9022.66	1.76781	19.7822	1.8416	0.126526	2.52636	0.0188758	1.21907	0.482538	120.547	1.45589	120.972	2.88115	129.342	52.0644	120.553	1.455		0.373	concordant
Spot 262	107.219	116.073	7593.5	2.84579	20.0521	2.64383	0.124364	2.87134	0.0189525	1.05754	0.368308	121.032	1.26802	119.02	3.2248	78.9684	63.4008	121.009	1.267		-1.78	rev discord.
Spot 121	1077.91	1113.91	2.23984e+06	7.03597	20.1877	0.94056	0.131083	1.60834	0.019349	1.30465	0.811176	123.541	1.59642	125.071	1.89261	154.232	22.0112	123.658	1.596		1.31	concordant
Spot 273	91.9665	101.053	6711.67	2.37858	15.5655	4.60731	0.173879	4.80066	0.0204037	1.18236	0.24629	130.207	1.52406	162.78	7.22043	667.46	99.641	129.905	1.524		24	discord.
Spot 314	169.799	193.155	20265.1	1.70843	19.7247	1.66464	0.141916	1.9811	0.0206821	0.985143	0.49727	131.965	1.28683	134.749	2.49997	184.071	40.0336	131.996	1.287		2.23	concordant
Spot 239	226.909	228.026	36111	47.7144	19.7501	1.62575	0.149645	1.83872	0.0218069	0.842512	0.458206	139.065	1.15909	141.599	2.43022	184.251	38.0451	139.092	1.159		1.93	concordant		high U/Th
Spot 89	246.164	262.539	76606.9	3.53271	20.234	1.38005	0.146974	1.72777	0.0218298	1.03924	0.60149	139.21	1.43121	139.236	2.24803	139.671	32.3897	139.211	1.43		0.0204	concordant
Spot 140	792.966	944.559	804945	1.22926	20.1146	0.969141	0.1531	1.41353	0.0224823	1.029	0.727963	143.325	1.45854	144.645	1.90566	166.331	22.6356	143.403	1.457		0.982	concordant
Spot 2	98.7469	105.75	46381.6	3.31343	19.5341	2.46529	0.157683	2.78244	0.0226601	1.28805	0.46292	144.446	1.83984	148.673	3.84816	216.621	57.0967	144.48	1.841		3.1	concordant
Spot 183	64.6538	73.7915	4792.34	1.66274	19.1529	2.76601	0.152568	3.83615	0.0226947	1.3405	0.349439	144.664	1.91762	144.177	5.15616	136.147	84.4913	144.659	1.917		-0.362	concordant
Spot 234	108.329	132.169	26913.9	1.06785	18.9666	2.37353	0.162322	2.56147	0.0227539	0.962147	0.375622	145.037	1.37989	152.734	3.63222	273.886	54.4019	145.042	1.381		5.56	discord.
Spot 3	143.695	152.841	26495.3	3.6921	19.171	1.66893	0.160649	2.09972	0.0227586	1.27122	0.605422	145.067	1.82352	151.271	2.951	249.608	38.4652	145.12	1.826		4.5	discord.
Spot 150	293.944	328.642	11781.4	1.99078	17.559	2.38705	0.174107	2.57405	0.0227977	0.962204	0.37381	145.313	1.38257	162.977	3.87576	427.938	53.2604	145.144	1.384		12.4	discord.
Spot 187	72.1427	82.0212	35962.6	1.7162	19.6132	2.20507	0.158951	2.36499	0.0229841	0.82776	0.350006	146.488	1.1989	149.784	3.29351	202.294	51.4267	146.506	1.199		2.39	concordant
Spot 47	58.1485	65.2608	64934.2	1.92129	18.4062	2.80252	0.170607	3.06473	0.0230547	1.24033	0.40471	146.933	1.80184	159.946	4.53536	357.232	63.2789	146.856	1.803		9.15	discord.
Spot 76	43.9704	50.0155	30908.8	1.70933	18.9269	3.29456	0.165224	3.51928	0.0231114	1.23718	0.351543	147.29	1.80159	155.266	5.06701	278.803	75.4655	147.294	1.802		5.68	discord.
Spot 208	38.3851	43.3276	6031.7	1.82507	18.0231	3.61577	0.16765	3.81709	0.0231497	1.21659	0.318722	147.532	1.77447	157.378	5.5649	308.306	82.4052	147.521	1.775		6.96	discord.
Spot 110	68.8449	74.5985	11404.1	2.81195	18.9904	2.74308	0.163364	2.93679	0.0232484	1.03766	0.35333	148.153	1.51979	153.644	4.18743	239.183	63.3721	148.171	1.52		3.92	discord.
Spot 159	82.0853	90.6589	4992.4	2.24992	19.3069	2.71273	0.155938	3.60045	0.0232728	1.21717	0.33806	148.307	1.78454	147.141	4.93182	128.41	79.7395	148.295	1.784		-0.848	concordant
Spot 14	377.35	463.218	12202.2	1.03272	19.5535	0.91643	0.159058	1.28573	0.0232674	0.898115	0.698523	148.273	1.31647	149.879	1.79157	175.328	21.468	148.354	1.316		1.16	concordant
Spot 226	112.386	119.481	18724.4	3.72244	18.5466	1.89359	0.169054	2.19728	0.023297	1.10697	0.50379	148.46	1.62462	158.598	3.22632	312.81	43.1925	148.424	1.627		7.12	discord.
Spot 263	183.992	205.845	1.1823e+07	1.97861	19.8459	1.47444	0.160829	1.61105	0.0233086	0.649222	0.402981	148.533	0.953281	151.429	2.2664	197.025	34.2607	148.556	0.953		2.08	concordant
Spot 195	55.0878	57.2054	3421.78	6.11335	18.5511	2.84296	0.158611	3.33346	0.0234015	1.22016	0.366036	149.117	1.7986	149.487	4.63366	155.354	72.647	149.121	1.798		0.266	concordant
Spot 39	113.514	125.987	40209.6	2.13881	20.5966	1.82756	0.15449	2.13176	0.0234423	1.09718	0.514681	149.374	1.62006	145.868	2.89654	89.2476	43.3317	149.251	1.617		-2.55	rev discord.
Spot 36	323.75	346.867	29488.2	3.29121	19.5914	1.09087	0.162159	1.46236	0.0234698	0.973004	0.665366	149.548	1.43836	152.591	2.07186	200.159	25.3742	149.649	1.439		2.17	concordant
Spot 35	34.4906	38.3592	5962.72	2.09515	17.9093	3.71734	0.171687	3.99063	0.0235282	1.24083	0.310934	149.915	1.83873	160.882	5.93749	325.512	86.1129	149.898	1.84		7.61	discord.
Spot 18	269.956	299.003	58672.8	2.18406	19.7801	1.22955	0.161964	1.46178	0.0235187	0.788495	0.539406	149.856	1.16798	152.42	2.06889	192.515	28.6244	149.904	1.168		1.82	concordant
Spot 13	451.271	497.187	25104.2	2.30962	19.7303	1.15713	0.161589	1.74918	0.0235857	1.31144	0.749747	150.278	1.94801	152.093	2.47073	180.462	26.975	150.399	1.947		1.29	concordant
Spot 154	25.7854	27.4306	3472.93	3.68324	18.3049	4.88725	0.163386	6.67123	0.0236244	1.7029	0.25526	150.522	2.53354	153.663	9.51348	202.398	149.849	150.531	2.534		2.22	concordant
Spot 127	221.275	246.347	8709.57	2.07393	19.7704	1.50321	0.157877	1.75168	0.0236378	0.894702	0.510767	150.606	1.33186	148.843	2.42517	120.868	35.4786	150.554	1.33		-1.26	concordant
Spot 249	681.742	845.676	119322	0.977281	19.9091	0.807162	0.162325	1.31763	0.0236593	1.0414	0.790362	150.742	1.55161	152.736	1.86844	183.778	18.8239	150.911	1.551		1.41	concordant
Spot 227	626.757	743.349	57636.4	1.26329	20.2258	0.861065	0.159878	1.45848	0.0238017	1.16424	0.798254	151.638	1.74483	150.596	2.0413	134.25	20.6659	151.498	1.736		-0.742	concordant
Spot 161	83.4213	89.2769	19738.1	3.34794	19.7543	2.51255	0.163061	2.73606	0.0238326	1.07962	0.394589	151.833	1.62006	153.379	3.89497	177.314	58.6191	151.849	1.62		1.09	concordant
Spot 182	382.619	410.377	50955.1	3.23923	19.7171	0.964799	0.16435	1.2932	0.0238222	0.854393	0.66068	151.767	1.28154	154.504	1.85346	196.681	22.5808	151.864	1.282		1.92	concordant
Spot 315	249.02	272.456	16192.4	2.49705	19.3273	1.53251	0.166214	1.8576	0.0238594	1.04028	0.560015	152.001	1.56275	156.128	2.68826	219.204	35.6311	152.067	1.564		2.88	concordant
Spot 17	220.91	239.456	549601	2.79923	19.8774	1.21616	0.164651	1.38365	0.0239203	0.659875	0.476909	152.385	0.993756	154.766	1.98621	191.414	28.2971	152.419	0.994		1.67	concordant
Spot 307	219.041	232.256	23550.3	3.89533	19.5066	1.56176	0.166274	1.89745	0.0239176	0.978455	0.515668	152.368	1.47337	156.18	2.74679	214.415	37.6791	152.42	1.474		2.66	concordant
Spot 32	56.8904	65.6961	32210.3	1.51825	19.2318	3.01141	0.1686	3.22922	0.0239433	1.16454	0.360627	152.53	1.75542	158.204	4.73067	244.041	69.4132	152.55	1.756		3.94	discord.
Spot 304	397.028	459.327	23105.9	1.49764	19.3633	1.41154	0.168413	1.66909	0.0240412	0.809359	0.484911	153.146	1.22489	158.041	2.4428	232.033	33.707	153.191	1.226		3.39	concordant
Spot 176	158.43	175.986	15786.5	2.1206	19.8107	1.93087	0.16416	2.16598	0.0242005	0.843075	0.389234	154.149	1.28417	154.338	3.10128	157.254	46.7166	154.151	1.284		0.132	concordant
Spot 10	174.157	189.665	24150.1	2.63916	19.7245	1.51256	0.165871	1.83615	0.0242147	1.03858	0.565628	154.238	1.58287	155.829	2.65253	180.075	35.3133	154.28	1.582		1.11	concordant
Spot 151	299.885	324.531	20184	2.85943	19.2846	1.21982	0.16988	1.5176	0.0242389	0.901252	0.593868	154.39	1.37491	159.315	2.23763	233.203	28.177	154.472	1.376		3.39	concordant
Spot 201	287.198	320.364	72184	2.03502	19.7346	1.27376	0.167128	1.61048	0.0242466	0.978852	0.6078	154.439	1.49376	156.924	2.34163	194.622	29.7307	154.511	1.494		1.72	concordant
Spot 300	190.422	211.125	26716.6	2.16154	20.0085	1.28037	0.164695	1.58898	0.0242624	0.86251	0.542809	154.538	1.31706	154.805	2.28148	158.913	31.2259	154.546	1.316		0.186	concordant
Spot 289	215.889	240.022	38967.9	2.10231	19.8303	1.41535	0.166666	1.73855	0.0242772	1.00791	0.579742	154.631	1.54	156.521	2.52184	185.208	32.9868	154.683	1.54		1.31	concordant
Spot 197	202.345	218.343	23275.4	2.97231	19.6924	1.38156	0.166662	1.63965	0.0243228	0.84966	0.518196	154.918	1.30059	156.518	2.37834	180.78	32.6844	154.952	1.3		1.11	concordant
Spot 106	193.2	221.217	96733.3	1.62054	20.0683	1.66268	0.165335	1.97477	0.0243325	1.06517	0.539392	154.979	1.63111	155.363	2.84486	161.224	38.9166	154.99	1.63		0.266	concordant
Spot 225	653.336	681.99	95399.4	5.35826	19.7814	1.03832	0.167561	1.56645	0.0243456	1.1724	0.748443	155.062	1.79625	157.3	2.28265	191.169	24.1824	155.209	1.796		1.54	concordant
Spot 56	314.244	362.285	461021	1.53716	19.8052	1.12956	0.167961	1.51877	0.0243557	1.01525	0.668467	155.126	1.55611	157.648	2.21771	195.75	26.2753	155.226	1.556		1.74	concordant
Spot 270	254.098	281.484	23114.3	2.18042	19.4247	1.63129	0.170152	1.81858	0.0243746	0.74694	0.410728	155.245	1.14573	159.551	2.68508	223.966	38.3517	155.276	1.146		2.95	concordant
Spot 40	463.261	476.406	87625.9	8.282	19.5881	1.24832	0.169711	1.89848	0.0243843	1.42718	0.75175	155.306	2.19001	159.168	2.79685	217.041	28.9899	155.503	2.193		2.65	concordant
Spot 148	205.77	220.838	16780.6	3.20918	19.3776	1.42088	0.169706	1.66384	0.0244191	0.86083	0.517376	155.525	1.32278	159.163	2.4511	213.688	32.9856	155.579	1.323		2.49	concordant
Spot 102	778.583	901.185	63205.5	1.49236	20.0969	0.862609	0.165647	1.28342	0.0244711	0.949953	0.740171	155.852	1.46277	155.634	1.8519	152.341	20.2071	155.833	1.459		-0.151	concordant
Spot 217	429.615	469.742	33026.6	2.51598	20.1047	1.27576	0.164541	1.54957	0.0244778	0.854496	0.551442	155.894	1.31613	154.67	2.2231	135.936	30.3761	155.851	1.314		-0.849	concordant
Spot 103	409.483	449.163	47832.1	2.42508	20.221	1.25784	0.164623	1.49307	0.0245082	0.800278	0.535995	156.085	1.23411	154.742	2.14297	134.246	29.6178	156.041	1.232		-0.931	concordant
Spot 91	229.38	255.171	37341.5	2.09002	20.3355	1.76679	0.163496	1.95861	0.0245144	0.828681	0.423096	156.124	1.27823	153.759	2.79461	117.463	41.8596	156.077	1.277		-1.64	concordant
Spot 312	118.136	126.045	8551.54	3.51	19.7919	2.28941	0.164475	2.53886	0.0245435	0.968238	0.381367	156.307	1.49522	154.613	3.64116	128.744	55.2156	156.283	1.494		-1.17	concordant
Spot 178	411.282	442.729	106719	3.07339	19.6779	1.26246	0.170464	1.45269	0.0245671	0.717903	0.494187	156.455	1.10968	159.822	2.14823	210.011	29.2942	156.503	1.11		2.3	concordant
Spot 160	112.315	122.2	18805.7	2.67007	18.9153	1.92152	0.175927	2.38692	0.0246218	1.22488	0.513166	156.8	1.89745	164.55	3.62594	277.568	46.9274	156.834	1.9		5.21	discord.
Spot 238	224.483	246.902	36715.7	2.35302	19.7751	1.35561	0.16916	1.69386	0.0246787	1.01445	0.598896	157.158	1.57501	158.689	2.48846	181.589	31.627	157.208	1.574		1.05	concordant
Spot 155	471.25	527.727	43210	1.96086	19.3665	0.967476	0.173426	1.87919	0.0246375	1.6053	0.854247	156.899	2.48828	162.388	2.82008	243.217	22.5128	157.321	2.502		3.71	discord.
Spot 33	33.0704	34.9705	10015.2	4.08999	20.2555	3.78085	0.16204	4.14001	0.0247419	1.68333	0.406599	157.555	2.62002	152.487	5.8619	74.3912	NA	157.44	2.616		-3.52	rev discord.
Spot 97	150.46	168.967	14146.6	1.91056	20.0236	1.59779	0.165556	1.95727	0.0247767	1.10645	0.565305	157.774	1.72451	155.555	2.82289	121.878	38.0464	157.681	1.721		-1.53	concordant
Spot 136	70.2845	78.6153	13387.7	1.98263	19.4476	2.12798	0.170646	2.33214	0.024779	0.939105	0.402679	157.789	1.46382	159.98	3.4519	192.563	49.6234	157.812	1.464		1.49	concordant
Spot 44	477.002	520.997	35800.9	2.54793	19.8698	1.0496	0.169376	1.79993	0.0248096	1.45956	0.8109	157.981	2.27781	158.878	2.64719	172.236	24.5943	158.091	2.272		0.61	concordant
Spot 233	173.086	196.463	310110	1.7399	19.5799	2.02984	0.173633	2.2766	0.0248799	1.03085	0.452802	158.424	1.61321	162.567	3.41994	223.334	46.9425	158.465	1.614		2.79	concordant
Spot 98	215.967	227.967	36627.2	4.22957	19.5677	1.34109	0.17433	2.07482	0.0251619	1.58155	0.76226	160.197	2.50237	163.17	3.12748	206.532	31.1659	160.398	2.503		1.98	concordant
Spot 125	264.639	285.146	95601.8	3.03267	19.6076	1.30606	0.175424	1.58261	0.0252419	0.890633	0.562761	160.7	1.41356	164.115	2.39828	213.691	30.3119	160.773	1.414		2.27	concordant
Spot 247	425.262	464.945	69869.2	2.5184	19.9003	1.06313	0.17314	1.31101	0.02527	0.765603	0.583978	160.877	1.21643	162.14	1.96465	180.608	24.812	160.917	1.216		0.845	concordant
Spot 149	328.245	379.033	21912	1.51884	19.6839	0.947942	0.174622	1.41276	0.0254101	0.805747	0.570336	161.757	1.28714	163.423	2.13256	187.596	26.9953	161.805	1.287		1.11	concordant
Spot 15	150.859	168.085	198163	2.05804	19.6422	1.58453	0.177224	1.96212	0.0254657	1.15722	0.589782	162.107	1.85255	165.669	2.9993	216.864	36.6994	162.194	1.853		2.35	concordant
Spot 276	346.411	417.192	17897.3	1.15011	19.6708	1.2524	0.174904	1.90578	0.0254731	1.29327	0.678605	162.154	2.07093	163.666	2.88073	185.58	32.6016	162.232	2.069		1	concordant
Spot 22	277.202	313.085	27921	1.81539	18.6728	1.44994	0.185013	1.77244	0.0254999	1.01693	0.573744	162.322	1.63008	172.365	2.80984	312.496	33.013	162.328	1.633		6.51	discord.
Spot 20	305.133	342.705	1.28481e+06	1.90848	19.5066	1.0823	0.184826	1.54627	0.0263568	1.10434	0.714195	167.707	1.82816	172.205	2.44919	234.469	24.9549	167.905	1.83		2.87	concordant
Spot 207	629.146	712.865	319541	1.76602	19.774	0.895799	0.182337	1.47749	0.0264454	1.17493	0.795218	168.263	1.95139	170.069	2.3136	195.297	20.8321	168.456	1.948		1.16	concordant
Spot 311	419.396	468.993	109645	1.98718	19.2497	0.944516	0.188828	1.37471	0.0265401	0.997192	0.725385	168.857	1.66197	175.629	2.21712	267.776	21.7204	169.064	1.667		4.27	discord.
Spot 117	145.433	165.991	35954.3	1.66249	19.9135	1.90209	0.181727	2.19143	0.0266642	1.04123	0.47514	169.637	1.74328	169.546	3.42186	168.26	45.0669	169.634	1.742		-0.0579	concordant
Spot 179	177.218	199.222	80164.7	1.89267	19.563	1.55848	0.187349	1.83197	0.0268868	0.962881	0.525599	171.034	1.6252	174.365	2.9351	219.773	36.0869	171.101	1.625		2.09	concordant
Spot 313	185.664	206.042	24814.3	2.14099	19.1619	1.26983	0.204245	1.58232	0.0288289	0.939575	0.593794	183.214	1.6972	188.712	2.72498	258.058	29.2796	183.35	1.699		3.23	concordant
Spot 165	482.594	542.475	1.55674e+06	1.89393	19.3476	1.1436	0.204922	1.61645	0.0289431	1.14241	0.70674	183.93	2.07155	189.283	2.79141	256.565	26.3091	184.18	2.074		3.13	concordant
Spot 134	139.584	151.635	14332.3	2.72182	19.6173	1.41987	0.200257	1.67376	0.0292955	0.852731	0.509471	186.138	1.56456	185.344	2.83555	175.215	33.6124	186.112	1.562		-0.467	concordant
Spot 202	171.866	187.512	37782.1	2.58144	19.3901	1.68653	0.20527	2.04193	0.0293641	1.08856	0.533104	186.567	2.00178	189.576	3.53113	227.207	39.9229	186.643	2.001		1.75	concordant
Spot 190	89.17	96.3908	52571.9	2.90204	18.5614	2.25783	0.216068	2.4262	0.0294632	0.887644	0.365858	187.188	1.63767	198.632	4.37715	336.809	51.1588	187.208	1.639		6.51	discord.
Spot 58	394.149	439.233	58895.9	2.05449	19.8563	1.00941	0.203822	1.2824	0.0297608	0.790393	0.616341	189.051	1.47255	188.355	2.20466	179.618	23.5302	189.012	1.469		-0.403	concordant
Spot 7	231.465	239.462	139819	6.80212	19.4534	1.16406	0.209694	1.42604	0.0298898	0.823025	0.577142	189.858	1.5398	193.296	2.50999	235.496	26.8876	189.967	1.54		1.97	concordant
Spot 258	352.212	475.409	55893.7	0.671852	17.31	1.2084	0.239331	2.12798	0.0303773	1.75155	0.823106	192.909	3.32884	217.872	4.17264	496.977	26.6046	190.089	3.386		13.6	discord.
Spot 116	252.797	273.177	18674.4	2.91505	19.0973	0.939865	0.211373	1.40997	0.0299567	0.882552	0.625939	190.277	1.65475	194.704	2.4981	248.695	25.3102	190.439	1.655		2.52	concordant
Spot 64	406.984	449.092	51692.3	2.27133	19.4002	1.17809	0.211404	1.51096	0.0301891	0.939177	0.621576	191.731	1.77418	194.73	2.67737	231.202	27.3489	191.858	1.773		1.7	concordant
Spot 108	242.172	261.184	32884.9	2.99333	19.2963	0.943869	0.213043	1.3127	0.0303051	0.911486	0.69436	192.458	1.7283	196.103	2.34092	240.178	21.7777	192.672	1.728		2.06	concordant
Spot 162	624.947	667.734	118398	3.43235	10.2531	1.7797	0.846122	4.36777	0.0633181	3.98874	0.913221	395.773	15.3116	622.518	20.3292	1565.61	33.361	193.72	11.89		98.6	discord.
Spot 112	903.363	973.803	188640	3.01377	18.9558	0.862223	0.219261	1.49108	0.0304265	1.21645	0.815821	193.217	2.31551	201.294	2.72267	297.03	19.6548	193.794	2.329		4.49	discord.
Spot 310	129.323	141.109	14760.1	2.57852	19.664	1.52026	0.209028	1.88718	0.0305322	1.07471	0.569481	193.878	2.05262	192.737	3.31295	178.763	36.1741	193.825	2.048		-0.647	concordant
Spot 269	228.453	237.239	382337	6.11052	19.2757	1.26494	0.223352	1.62805	0.0313909	1.02492	0.629541	199.247	2.0109	204.696	3.01813	267.892	29.0098	199.447	2.012		2.97	concordant
Spot 253	263.863	290.152	35497.9	2.35871	19.1469	1.47729	0.240493	1.8067	0.033896	1.0361	0.573478	214.886	2.18974	218.824	3.55653	261.417	33.9963	215.029	2.189		2.01	concordant
Spot 278	428.738	502.806	186631	1.36029	19.3866	0.795951	0.257955	1.64175	0.036504	1.4359	0.874615	231.127	3.25997	233.017	3.41836	252.15	18.2875	231.708	3.228		0.922	concordant
Spot 84	131.493	137.008	15094.6	5.60318	18.7956	1.09461	0.262725	1.46735	0.0368034	0.971372	0.661993	232.988	2.22278	236.861	3.09996	275.423	25.2152	233.246	2.22		1.84	concordant
Spot 244	124.436	130.852	186454	4.5576	6.02809	1.07034	1.915	1.72966	0.0844002	1.35872	0.785537	522.334	6.81712	1086.33	11.5383	2503.05	18.0116	312.607	5.65		126	discord.
Spot 124	466.854	574.497	190163	1.01921	18.7535	0.898992	0.369603	1.35502	0.0507847	1.01368	0.748092	319.338	3.1582	319.359	3.71295	319.538	20.4581	319.342	3.121		0.00781	concordant
Spot 170	587.35	601.816	267561	9.54172	11.032	6.88612	0.747426	8.98453	0.0602837	5.77088	0.642314	377.351	21.1514	566.73	39.0399	1423.86	131.698	346.89	21.08		52.8	discord.
Spot 4	310.022	345.462	76727.1	2.05577	18.1101	1.03193	0.421502	1.32866	0.0560024	0.830606	0.625145	351.268	2.83959	357.124	4.00035	395.335	23.2552	351.813	2.83		1.94	concordant
Spot 294	324.902	346.563	34653.8	3.52478	16.7204	0.812572	0.482336	1.26391	0.0592277	0.967906	0.765804	370.927	3.48889	399.674	4.17591	569.481	17.7088	373.672	3.546		8.88	discord.
Spot 138	18.8358	142.369	8959	0.0358317	14.6825	2.27164	0.579485	2.69285	0.0636148	1.42241	0.528216	397.572	5.48423	464.131	10.0319	808.47	47.85	396.764	5.542		19	discord.
Spot 141	46.9208	51.3651	28314.3	2.48104	17.1712	1.7135	0.502911	2.22014	0.0635813	1.40652	0.633528	397.369	5.42031	413.671	7.54357	505.658	37.7915	398.8	5.425		4.83	discord.
Spot 224	1567.91	1595.86	295929	13.1848	9.67956	0.557173	1.57023	1.27125	0.111347	1.14263	0.898821	680.568	7.37994	958.519	7.88609	1665.86	10.3085	403.445	7.093		82.9	discord.		high U/Th
Spot 74	1318.07	1390.29	272385	4.28879	9.89993	0.775332	1.58513	1.83545	0.114966	1.66364	0.906396	701.525	11.0583	964.385	11.4281	1624.03	14.422	416.59	10.96		80.7	discord.
Spot 34	450.502	503.504	237430	1.99742	17.2785	0.864421	0.613268	1.49333	0.0775778	1.21764	0.815389	481.649	5.65102	485.619	5.76413	504.414	19.014	483.396	5.461		1.02	concordant
Spot 41	472.21	502.992	946704	3.60504	10.1183	1.31713	1.2082	1.93999	0.0893905	1.42434	0.7342	551.931	7.53425	804.364	10.7782	1586.91	24.6197	483.925	7.729		56.3	discord.
Spot 221	70.512	79.6939	16542.6	1.80468	17.3345	1.2328	0.6698	1.50357	0.0864035	0.844513	0.561673	534.232	4.32977	520.591	6.12405	461.156	27.5789	532.125	4.242		-3.25	rev discord.
Spot 79	659.313	668.875	5.42848e+06	16.2024	10.7897	0.691703	1.6456	1.34758	0.130025	1.15652	0.858214	788.008	8.57844	987.865	8.5113	1463.03	13.1436	748.76	11.61		36.1	discord.		high U/Th
Spot 152	260.775	282.647	255332	2.80185	13.4852	0.731729	1.69881	1.15236	0.167244	0.890188	0.772492	996.906	8.2222	1008.08	7.36543	1032.44	14.8071	1005.04	7.307		1.61	concordant
Spot 186	827.332	828.258	447739	210.016	11.4543	0.49864	2.12623	0.873794	0.178179	0.71754	0.821177	1057.02	6.99536	1157.36	6.03439	1350.41	9.62127	1139.13	6.803		13.5	discord.		high U/Th
Spot 296	155.036	171.397	170123	2.22677	12.6698	0.759224	2.09501	1.31641	0.193684	1.07527	0.816821	1141.3	11.2471	1147.17	9.04808	1158.26	15.0617	1147.34	9.088		0.797	concordant
Spot 43	422.1	467.278	202384	2.19563	12.5169	0.617366	2.14302	1.31185	0.196283	1.15739	0.882253	1155.32	12.2418	1162.8	9.0825	1176.77	12.2265	1166.05	8.727		1.15	concordant
Spot 107	230.477	254.337	147022	2.2699	11.5963	0.610439	2.20177	1.16167	0.186807	0.988194	0.850669	1104.05	10.0271	1181.61	8.11154	1326.5	11.824	1190.14	8.708		10.8	discord.
Spot 280	748.24	810.1	163378	2.84248	10.9578	0.685916	2.42707	1.38142	0.194078	1.19889	0.867874	1143.43	12.5616	1250.65	9.93407	1440.28	13.0803	1277.96	10.73		14.8	discord.
Spot 308	314.215	343.966	350196	2.48203	11.3818	0.662017	2.69476	0.94612	0.223524	0.675909	0.714402	1300.47	7.96011	1327.02	7.00675	1370.12	12.7409	1319.09	6.961		3.07	concordant
Spot 86	381.488	427.827	496078	1.93461	11.3564	0.695121	2.71879	1.12339	0.225933	0.8825	0.785569	1313.15	10.4845	1333.6	8.33958	1366.58	13.3841	1333.06	8.462		2.41	concordant
Spot 283	350.496	381.941	169098	2.61936	11.293	0.679331	2.73735	1.01212	0.225659	0.749839	0.740862	1311.71	8.89959	1338.66	7.52723	1382	13.0601	1333.1	7.595		3.1	concordant
Spot 196	391.225	423.95	553507	2.80945	11.2971	0.697595	2.75963	1.01389	0.228235	0.735754	0.725673	1325.24	8.81359	1344.69	7.55676	1375.75	13.4136	1340.01	7.533		2.22	concordant
Spot 54	742.868	767.358	433749	7.12852	11.1402	0.700885	2.71976	1.32263	0.221771	1.12165	0.848046	1291.23	13.1247	1333.87	9.81967	1402.97	13.4269	1345.02	9.863		5.43	discord.
Spot 257	258.164	283.298	163305	2.41378	11.1371	0.593072	2.80268	0.883132	0.228075	0.654037	0.740588	1324.4	7.83021	1356.25	6.60914	1406.8	11.3623	1349.71	6.697		3.64	concordant
Spot 157	239.631	262.19	177464	2.49624	11.3273	0.663855	2.77347	1.21231	0.22914	1.01429	0.836656	1329.99	12.1893	1348.42	9.04771	1377.76	12.7643	1352.62	8.997		2.28	concordant
Spot 164	108.437	122.801	86837.4	1.77404	11.2832	0.893627	2.826	1.23785	0.233155	0.853801	0.689745	1351.01	10.4064	1362.46	9.28404	1380.44	17.2227	1358.72	9.016		1.29	concordant
Spot 28	739.015	791.567	316963	3.30472	10.8793	0.728426	2.82006	1.35036	0.224569	1.13703	0.842023	1305.97	13.4418	1360.88	10.1223	1448.19	13.8694	1373.37	10.3		6.81	discord.
Spot 267	672.576	694.292	543625	7.27856	11.1994	0.690119	2.86343	1.25575	0.234044	1.04911	0.835448	1355.66	12.8265	1372.35	9.45058	1398.39	13.2288	1376.25	9.374		2.03	concordant
Spot 292	326.342	425.554	217296	0.772995	11.1247	0.711208	2.92106	1.0517	0.237147	0.774704	0.736618	1371.85	9.57305	1387.38	7.95554	1411.34	13.6104	1384.66	7.969		1.73	concordant
Spot 73	403.283	461.878	197840	1.6174	11.1048	0.58391	3.04233	1.23689	0.247579	1.09034	0.881522	1425.98	13.9485	1418.31	9.4525	1406.79	11.1815	1414.32	8.681		-0.995	concordant
Spot 210	234.491	245.61	85829.6	4.95578	11.0119	1.01212	3.05869	1.43825	0.247322	1.02065	0.709644	1424.65	13.046	1422.41	11.006	1419.04	19.3703	1422.9	10.8		-0.243	concordant
Spot 174	89.7895	100.747	85940.5	1.92563	10.6493	0.972256	3.12304	1.34696	0.243338	0.93162	0.691647	1404.03	11.7538	1438.38	10.36	1489.54	18.42	1427.38	10.28		3.75	discord.
Spot 220	60.035	66.8758	161511	2.06237	10.7339	0.84797	3.19312	1.27183	0.251409	0.947884	0.745291	1445.74	12.2759	1455.5	9.83446	1469.76	16.0987	1454.49	9.865		1.05	concordant
Spot 62	179.867	196.012	797387	2.61796	10.6676	0.594635	3.1751	1.03948	0.24782	0.852605	0.82022	1427.22	10.9157	1451.12	8.02689	1486.29	11.2639	1455.58	8.032		2.73	concordant
Spot 61	367.236	397.99	1.52032e+06	2.8062	10.7032	0.719799	3.20973	1.04929	0.251336	0.763477	0.727613	1445.36	9.88542	1459.51	8.1236	1480.14	13.6461	1457.14	8.128		1.51	concordant
Spot 80	676.19	703.229	431425	5.87671	10.4686	0.798052	3.21507	1.40006	0.24655	1.15034	0.821632	1420.66	14.6669	1460.8	10.8438	1519.64	15.0489	1468.15	10.95		4.57	discord.
Spot 295	336.834	395.098	1.20718e+06	1.35858	10.5843	0.503549	3.19503	0.961469	0.24653	0.819061	0.851885	1420.55	10.4424	1455.96	7.43554	1508	9.5109	1468.18	7.257		4.24	discord.
Spot 271	115.382	132.433	426024	1.59023	10.4772	0.619749	3.36086	0.972467	0.256565	0.749395	0.770612	1472.24	9.86375	1495.32	7.61011	1528.17	11.673	1495.16	7.721		2.46	concordant
Spot 29	160.517	175.556	166677	2.5081	10.467	0.854328	3.38728	1.26958	0.259736	0.939123	0.73971	1488.49	12.4823	1501.46	9.95315	1519.79	16.1099	1500.09	10		1.36	concordant
Spot 75	1502.57	1643.19	4.93522e+06	2.51106	10.0576	0.740837	3.32009	1.39076	0.244519	1.17702	0.846314	1410.15	14.9078	1485.79	10.8532	1595.47	13.8328	1508.47	10.92		8.84	discord.
Spot 153	150.737	201.906	318193	0.69227	10.0709	0.799207	3.47212	1.26311	0.255195	0.978098	0.774359	1465.21	12.8192	1520.9	9.95785	1599.28	14.9157	1519.84	10.34		5.9	discord.
Spot 265	126.436	139.706	1.17922e+06	2.23898	10.3567	0.750291	3.4942	1.27306	0.264067	1.02847	0.807871	1510.62	13.8502	1525.9	10.0505	1547.15	14.0982	1528.48	10.02		1.65	concordant
Spot 200	198.404	212.712	274644	3.25868	10.0956	0.715919	3.49951	1.15426	0.258814	0.905403	0.784404	1483.77	12.0001	1527.11	9.11561	1587.65	13.3797	1528.89	9.351		4.59	discord.
Spot 175	627.416	711.392	203378	1.75577	10.1812	0.633067	3.49567	1.18452	0.260131	1.00114	0.845183	1490.51	13.3226	1526.24	9.35234	1576.1	11.8493	1538.16	9.117		4.07	discord.
Spot 144	604.164	703.019	711218	1.43622	10.3056	0.604163	3.54322	1.25753	0.266602	1.10289	0.877029	1523.53	14.9649	1536.92	9.95854	1555.38	11.3401	1543.81	9.102		1.61	concordant
Spot 222	127.13	138.472	230085	2.63404	9.74803	0.686635	3.60615	1.2659	0.257762	1.06346	0.840083	1478.38	14.0495	1550.89	10.0635	1651.1	12.7284	1572.31	10.06		8.11	discord.
Spot 293	124.187	137.496	318905	2.19294	10.0608	0.665909	3.74349	1.11398	0.274775	0.893023	0.801649	1564.99	12.4087	1580.72	8.92684	1601.75	12.424	1583.27	8.903		1.64	concordant
Spot 46	121.719	132.337	79841.4	2.69409	9.84848	0.805658	3.81392	1.36072	0.275087	1.09657	0.805874	1566.57	15.2506	1595.69	10.9469	1634.34	14.9663	1600.81	10.96		3.03	concordant
Spot 256	98.2413	116.974	194363	1.23244	10.131	0.700408	3.90697	1.42593	0.289151	1.24202	0.871025	1637.28	17.9584	1615.12	11.5285	1586.34	13.093	1604.13	10.48		-2.5	rev discord.
Spot 229	91.5629	101.16	1.24696e+06	2.24216	9.75457	0.76327	3.94937	1.17787	0.281632	0.897102	0.761632	1599.58	12.7081	1623.86	9.54371	1655.46	14.1401	1624.21	9.672		2.41	concordant
Spot 242	404.339	473.318	524067	1.37753	9.66483	0.674878	4.03928	1.53385	0.285586	1.3774	0.898003	1619.43	19.7249	1642.14	12.4845	1671.32	12.4772	1656.69	10.59		2.69	concordant
Spot 70	394.016	409.364	452849	6.03277	9.50412	0.696878	4.14187	1.05644	0.288013	0.793985	0.751569	1631.59	11.4452	1662.61	8.64091	1701.99	12.834	1662.21	8.794		3.01	concordant
Spot 205	153.493	164.645	311962	3.2346	9.45939	0.79207	4.16691	1.33994	0.288964	1.08077	0.806579	1636.35	15.6191	1667.54	10.9728	1707.01	14.5781	1673.88	10.93		3.14	concordant
Spot 129	179.941	197.545	268176	2.40202	9.51415	0.620126	4.19817	1.01663	0.29233	0.805584	0.792409	1653.16	11.7471	1673.66	8.33702	1699.45	11.4239	1676.83	8.329		2.03	concordant
Spot 287	119.942	128.626	188604	3.24606	9.45535	0.598663	4.32954	0.962706	0.298659	0.753803	0.783004	1684.66	11.1752	1699	7.94117	1716.73	11.009	1700.88	7.934		1.39	concordant
Spot 115	198.876	217.161	221298	2.55596	9.40667	0.816177	4.33766	1.23992	0.298436	0.933371	0.752767	1683.55	13.8294	1700.55	10.2316	1721.55	14.9969	1700.88	10.32		1.62	concordant
Spot 85	1282.57	1469.44	1.81309e+06	1.6129	8.96237	0.605937	4.06724	1.23604	0.266738	1.07733	0.871597	1524.22	14.624	1647.76	10.0741	1809.1	11.011	1708.86	9.427		14	discord.
Spot 114	270.058	294.389	3.11835e+06	2.60831	9.20644	0.521318	4.39282	1.04263	0.295639	0.902946	0.866025	1669.65	13.2818	1710.99	8.62381	1761.96	9.53011	1730.93	7.877		4.44	discord.
Spot 96	826.943	850.83	3.48503e+07	8.13545	9.17078	0.68076	4.52978	1.31555	0.303973	1.12572	0.855701	1710.98	16.9167	1736.46	10.9427	1767.27	12.4367	1747.62	10.13		2.64	concordant
Spot 302	709.12	725.647	2.73191e+06	10.0832	9.15291	0.544824	4.48114	1.08276	0.29867	0.935696	0.86418	1684.71	13.8722	1727.48	8.98854	1779.69	9.93618	1747.82	8.222		4.54	discord.		high U/Th
Spot 100	261.033	284.015	968821	2.66919	9.1139	0.615045	4.58201	0.975676	0.30565	0.757406	0.776288	1719.27	11.43	1746	8.13225	1778.15	11.2192	1749.02	8.181		2.52	concordant
Spot 240	592.646	670.12	240709	1.79764	9.11319	0.519566	4.51838	1.27623	0.301304	1.16568	0.913375	1697.77	17.399	1734.36	10.6107	1778.77	9.47673	1760.79	8.301		4.27	discord.
Spot 184	188.955	202.001	166844	3.40363	9.24257	0.680263	4.76104	1.11241	0.322085	0.880057	0.791126	1799.91	13.8211	1778.06	9.33487	1752.48	12.4514	1773.65	9.118		-2.04	rev discord.
Spot 230	280.998	295.068	270606	4.6931	8.95829	0.649117	4.71954	1.09696	0.309185	0.884277	0.806118	1736.7	13.4625	1770.72	9.19116	1811.06	11.7932	1778.61	9.082		3.26	concordant
Spot 194	154.534	160.574	307982	6.01237	8.85555	0.696553	4.78076	1.26924	0.30963	1.06102	0.835949	1738.88	16.171	1781.53	10.6586	1831.83	12.625	1796.71	10.18		4.21	discord.
Spot 66	414.255	436.139	1.80212e+06	4.44855	9.03656	0.585781	4.88676	0.851837	0.322781	0.618456	0.726026	1803.3	9.72853	1799.98	7.18023	1796.11	10.6635	1800.04	7.167		-0.299	concordant
Spot 49	407.709	445.299	1.70248e+06	2.54893	8.91975	0.737866	5.14087	1.44611	0.335427	1.2437	0.860031	1864.63	20.1379	1842.89	12.2931	1818.41	13.3936	1832.68	11.09		-2.14	rev discord.
Spot 173	973.382	1088.33	394190	1.98993	8.60418	0.727767	4.95532	1.40781	0.311533	1.2051	0.856015	1748.25	18.4531	1811.73	11.8949	1885.55	13.1033	1840.17	10.96		6.39	discord.
Spot 250	43.5669	49.089	80512.1	1.85405	8.83775	0.892209	5.12487	1.28016	0.331481	0.917972	0.717075	1845.56	14.7324	1840.24	10.8767	1834.21	16.1674	1840.4	10.84		-0.469	concordant
Spot 126	33.4134	36.3445	104914	2.67886	8.79058	0.712147	5.31512	1.27656	0.342231	1.05919	0.829721	1897.4	17.4094	1871.3	10.9098	1842.42	12.8961	1861.95	10.25		-2.43	rev discord.
Spot 143	594.883	610.089	674232	9.19366	8.35024	0.633944	5.13951	1.34485	0.313246	1.18606	0.881926	1756.66	18.2375	1842.66	11.4317	1941.19	11.3405	1891.87	9.764		8.95	discord.
Spot 245	995.959	1050.53	1.74219e+06	4.28885	8.10842	0.600396	5.22625	1.26156	0.309514	1.10953	0.879491	1738.31	16.9055	1856.91	10.7527	1992.42	10.6739	1923.93	9.226		12.3	discord.
Spot 93	405.193	426.143	443986	4.54501	7.02502	1.16872	6.19931	1.79171	0.31852	1.35806	0.757967	1782.5	21.1489	2004.35	15.667	2241.45	20.2086	1999.77	18.19		19.1	discord.
Spot 191	295.152	313.344	216553	3.8127	6.54941	0.92441	8.67489	1.41503	0.415396	1.07132	0.757098	2239.54	20.2686	2304.45	12.8836	2362.47	15.7829	2315.76	12.83		4.82	discord.
Spot 109	48.3679	52.5522	373881	2.71647	3.05806	0.825006	33.5885	1.14015	0.750738	0.786954	0.690222	3610.23	21.7539	3598.03	11.2426	3591.23	12.6637	3596.06	10.93		-0.602	concordant

## Sheet: 18COA-3
Aliquot Name	18COA-3
Stratigraphic Formation Name	upper Empire Fm
Stratigraphic Age	Miocene-Plio?
Rock Type	sandstone
Mineral	Zircon
Method	U-Pb
Latitude	43.3399
Longitude	-124.318
Internal Uncertainty Level	one sigma
External Uncertainty 206/238 (% two sigma)	1.33954
External Uncertainty 206/207 (% two sigma)	0.805449
Analysis Purpose	DZ
Laboratory Name	Arizona LaserChron Center
Analyst Name	M. Darin
Aliquot Reference
Aliquot Instrumental Method	LA-ICPMS
Aliquot Instrumental Reference	Gehrels, G.E., Valencia, V., Ruiz, J., 2008, Enhanced precision, accuracy, efficiency, and spatial resolution of U-Pb ages by laser ablation-multicollector-inductively coupled plasma-mass spectrometry: Geochemistry, Geophysics, Geosystems, v. 9, Q03017, doi:10.1029/2007GC001805.
	Gehrels, G. and Pecha, M., 2014, Detrital zircon U-Pb geochronology and Hf isotope geochemistry of Paleozoic and Triassic passive margin strata of western North America: Geosphere, v. 10 (1), p. 49-65.
								Isotope ratios						Apparent ages (Ma)				Best Age
Analysis	U	eU	206Pb	U/Th	206Pb*	±	207Pb*	±	206Pb*	±	error	206Pb*	±	207Pb*	±	206Pb*	±	Concordia Age	±1σ	within 10% of YSCG (*)	Discordance (dc)	Concordance	Age Class	Notes
	(ppm)	(ppm)	204Pb		207Pb*	(%)	235U	(%)	238U	(%)	corr.	238U	(Ma)	235U	(Ma)	207Pb*	(Ma)	(Ma)	(Ma)		(%)
Spot 288	480.119	513.256	4613.8	3.40488	19.4466	4.00925	0.00832816	4.49831	0.00125071	1.98874	0.442109	8.05755	0.160144	8.42126	0.377247	113.706	95.2395	8.05	0.16	YSCG	4.4	discord.	Y	YSCG
Spot 48	557.743	621.492	3302.82	2.05604	22.9979	3.1231	0.0084729	3.5196	0.00157258	1.51437	0.430267	10.1295	0.153278	8.567	0.300255	NA	NA	10.05	0.15		-17	rev discord.	D	does not overlap concordia within 2σ
Spot 219	361.982	413.285	4325.48	1.65808	18.9948	2.95128	0.0117692	4.15033	0.00173102	1.61026	0.387983	11.1492	0.179376	11.8805	0.490206	162.625	89.4804	11.14	0.18		6.4	discord.	S
Spot 13	282.552	303.056	5457.14	3.23839	20.3439	2.8412	0.025327	3.34867	0.00394196	1.07437	0.320834	25.3615	0.27194	25.3964	0.839892	28.6912	NA	25.36	0.27		0.14	concordant	S
Spot 240	212.124	232.82	12686.4	2.40858	21.7037	3.04846	0.0246617	3.2932	0.00397552	1.24517	0.378104	25.577	0.317847	24.7373	0.804805	NA	NA	25.57	0.32		-3.4	rev discord.	S
Spot 91	340.195	378.989	4966.32	2.06075	20.8471	2.56753	0.0281108	4.31648	0.00451396	0.99791	0.231186	29.0334	0.289075	28.1494	1.19837	NA	NA	29.03	0.29		-3.1	rev discord.	S
Spot 192	446.1	483.696	52715.6	2.78848	19.9991	2.35448	0.0348588	2.81252	0.00506593	1.5378	0.54677	32.5746	0.49967	34.7921	0.961962	190.638	54.803	32.53	0.5		6.7	discord.	D	does not overlap concordia within 2σ
Spot 146	1162.83	1286.9	55336	2.20238	21.4413	1.13112	0.0377013	1.73037	0.00589274	1.30862	0.756266	37.8755	0.494193	37.5772	0.63834	18.5867	NA	37.87	0.49		-0.81	concordant	P	high eU
Spot 183	278.241	318.477	9854.47	1.62511	20.2874	2.33079	0.0438829	2.58401	0.00664225	1.10979	0.429483	42.6771	0.472061	43.608	1.10298	95.0901	55.2481	42.68	0.47		2.2	concordant	S	YC2σ
Spot 262	231.439	248.92	38189.9	3.11119	20.7678	3.45124	0.0446339	3.68697	0.00676802	1.25039	0.339139	43.4825	0.541872	44.3382	1.59956	90.9019	82.1975	43.48	0.54		2	concordant	S	YC2σ
Spot 55	567.567	611.209	18690.6	3.0562	21.7875	1.54265	0.0431785	2.08617	0.00691899	1.3791	0.661068	44.4491	0.61089	42.9225	0.876776	NA	NA	44.38	0.61		-3.6	rev discord.	S	YC2σ
Spot 43	227.374	244.211	4972.28	3.17355	18.0533	2.80476	0.0502935	3.22861	0.00694573	0.895129	0.277249	44.6203	0.39803	49.8245	1.56981	307.924	70.6463	44.58	0.4		11	discord.	D	does not overlap concordia within 2σ
Spot 35	188.336	212.094	5664.48	1.86294	20.9704	2.7245	0.0433766	3.56744	0.00697087	0.938443	0.263058	44.7812	0.41879	43.1154	1.50592	NA	NA	44.77	0.42		-3.9	rev discord.	S
Spot 8	40.7954	59.2541	3485.19	0.519371	20.1782	5.04703	0.043919	5.49177	0.00701602	2.0369	0.370901	45.0702	0.914835	43.6431	2.346	NA	NA	45.06	0.91		-3.3	rev discord.	S	YC2σ
Spot 211	460.699	507.417	49244.6	2.3174	20.6927	1.92265	0.0472948	2.24453	0.00712171	1.13541	0.505857	45.7468	0.517575	46.9213	1.0292	107.383	45.7503	45.74	0.52		2.6	concordant	S
Spot 147	903.078	1036.36	30114	1.59232	20.9724	1.40509	0.0480925	2.01246	0.00738638	1.43306	0.712092	47.4407	0.677358	47.6944	0.93764	60.4678	33.6887	47.44	0.68		0.55	concordant	P	high eU
Spot 214	640.308	768.002	1.15734e+06	1.17839	21.2685	1.34583	0.0481022	1.77537	0.00739964	1.15787	0.652187	47.5255	0.54826	47.7039	0.827331	56.662	32.1078	47.53	0.55		0.38	concordant	S
Spot 63	420.59	499.048	13160.9	1.25976	21.6421	1.70651	0.0466312	2.03453	0.00746935	1.09302	0.537235	47.9716	0.522394	46.2778	0.920402	NA	NA	47.93	0.52		-3.7	rev discord.	S
Spot 18	474.475	548.63	10240.6	1.50362	21.2132	1.7769	0.0473718	2.96281	0.00750583	2.29019	0.772977	48.205	1.09987	46.9959	1.36067	NA	NA	48.12	1.1		-2.6	rev discord.	S
Spot 277	144.412	157.874	7136.31	2.52097	22.9313	2.85016	0.0446036	4.90734	0.00778376	3.9894	0.812945	49.9831	1.98631	44.3087	2.12762	NA	NA	48.12	1.93		-13	rev discord.	S
Spot 224	473.293	549.991	8297.61	1.45016	18.9051	1.87116	0.0530024	2.28042	0.00750642	1.05089	0.46083	48.2088	0.50473	52.4399	1.1655	250.306	46.59	48.14	0.5		8.6	discord.	S
Spot 293	381.539	427.525	12086.7	1.94977	20.8935	2.4765	0.0494431	2.78347	0.00768071	0.923262	0.331695	49.3239	0.453651	49.002	1.33157	33.2582	NA	49.32	0.45		-0.67	concordant	S
Spot 37	1124.46	1317.54	40748.3	1.36864	21.3852	1.24597	0.0493663	1.84155	0.00770643	1.353	0.734709	49.4884	0.667016	48.9277	0.879664	21.5444	NA	49.47	0.67		-1.2	concordant	P	high eU
Spot 116	232.502	252.834	166187	2.68731	21.1198	2.57859	0.0504236	2.77819	0.00772517	1.03401	0.372188	49.6083	0.510985	49.9502	1.35413	66.3678	61.3908	49.61	0.51		0.7	concordant
Spot 176	166.862	191.493	4798.08	1.59198	20.7719	2.71744	0.0491289	4.31362	0.00790067	1.37505	0.31877	50.7309	0.694838	48.698	2.05107	NA	NA	50.72	0.69		-4.2	rev discord.
Spot 151	311.436	335.544	34162.1	3.0357	21.4745	2.1104	0.0505215	2.28693	0.00793851	0.877706	0.383793	50.9729	0.445628	50.0449	1.11674	5.84124	NA	50.97	0.45		-1.9	rev discord.
Spot 222	210.389	253.057	16798.9	1.15875	21.3107	2.9606	0.0508929	3.16423	0.00800448	1.11572	0.352605	51.3948	0.571143	50.4038	1.55596	3.51766	NA	51.39	0.57		-2	rev discord.
Spot 291	347.312	391.518	6282.87	1.84631	21.7181	2.01993	0.0485201	2.41025	0.0080474	1.18489	0.491605	51.6693	0.609776	48.1086	1.1325	NA	NA	51.55	0.61		-7.3	rev discord.
Spot 273	374.95	453.502	10777.9	1.12173	21.8042	2.08643	0.0497522	2.83143	0.00810241	1.12681	0.397965	52.021	0.583819	49.3011	1.36258	NA	NA	51.98	0.58		-5.5	rev discord.
Spot 270	258.755	298.268	28371.3	1.53894	20.6654	2.21666	0.0538298	2.52186	0.00814815	1.19627	0.474362	52.3135	0.623281	53.2375	1.30798	95.0325	52.5803	52.31	0.62		1.8	concordant
Spot 125	242.856	290.132	59829.5	1.2072	21.1974	2.63361	0.0529049	2.87082	0.00817406	1.14234	0.397916	52.4792	0.59706	52.3459	1.46468	46.257	NA	52.48	0.6		-0.26	concordant
Spot 100	1593.35	1766.82	212925	2.15854	20.9169	1.24362	0.0541899	1.72806	0.0081991	1.19982	0.694315	52.6393	0.629005	53.5844	0.901964	96.0664	29.4416	52.64	0.63		1.8	concordant
Spot 4	677.005	768.804	14676.1	1.73308	21.4592	1.24968	0.0517396	2.17402	0.0082157	1.48628	0.683657	52.7454	0.780748	51.2216	1.08595	NA	NA	52.67	0.78		-3	rev discord.
Spot 68	1115.73	1297.39	106573	1.44326	21.4372	1.44592	0.052966	1.9555	0.00823471	1.31568	0.67281	52.867	0.692714	52.4049	0.99878	31.3012	NA	52.85	0.69		-0.9	concordant
Spot 191	2089.93	2625.35	194133	0.917288	21.0242	0.990196	0.0588404	1.40803	0.00895352	1.00091	0.710856	57.4612	0.572579	58.0539	0.79449	82.5492	23.4802	57.47	0.57		1.1	concordant
Spot 187	1015.93	1052.66	30122.1	6.50086	21.0958	1.16323	0.0616387	1.66877	0.00949257	1.08325	0.649132	60.9044	0.656642	60.7338	0.983794	54.0117	30.2781	60.9	0.66		-0.29	concordant
Spot 163	902.221	981.73	78345.3	2.66664	21.1284	1.32957	0.0629345	1.79997	0.0096705	1.21217	0.673436	62.0406	0.748428	61.9724	1.08213	59.3634	31.7025	62.04	0.75		-0.11	concordant
Spot 203	585.428	599.342	22332.5	9.88775	20.6588	1.49369	0.0646806	1.83277	0.009804	1.01159	0.551944	62.8928	0.633121	63.639	1.13056	91.779	36.2307	62.9	0.63		1.2	concordant
Spot 235	411.882	467.649	8178.32	1.73565	20.8937	1.54407	0.0672901	2.19951	0.0105656	0.934446	0.424842	67.7531	0.629801	66.1246	1.40807	7.57295	NA	67.73	0.63		-2.5	rev discord.
Spot 216	643.804	730.789	14203.4	1.73931	21.0766	1.2002	0.0697998	1.64259	0.0108763	1.11502	0.678817	69.7345	0.77336	68.5094	1.0882	25.9538	NA	69.68	0.77		-1.8	rev discord.
Spot 248	1214.02	1239.15	67401.4	11.3502	20.4932	1.14223	0.0752341	2.23111	0.0112175	1.91372	0.857743	71.9103	1.36851	73.6542	1.58512	130.641	26.9824	71.93	1.37		2.5	concordant		high U/Th
Spot 124	784.25	888.905	45006.8	1.761	20.8288	1.36158	0.0746564	1.88727	0.0113487	1.30197	0.689867	72.7463	0.941809	73.1086	1.33126	84.9957	32.4091	72.75	0.94		0.51	concordant
Spot 112	151.113	166.003	6793.88	2.38487	18.4219	2.83108	0.0820334	3.15822	0.0113884	1.04203	0.329942	72.9993	0.756382	80.0549	2.43121	296.061	68.0551	72.95	0.76		9.6	discord.
Spot 158	1768.19	1887.95	83053.4	3.46959	20.8514	0.924985	0.0803337	1.55473	0.0121704	1.2453	0.800978	77.9816	0.965259	78.4586	1.17388	93.0147	22.0577	78	0.97		0.63	concordant
Spot 101	392.757	414.247	102862	4.29498	21.114	1.4282	0.0836971	1.74476	0.0128043	1.00214	0.574373	82.0176	0.816728	81.6149	1.36826	69.8577	33.9965	82.01	0.82		-0.51	concordant
Spot 172	368.505	418.477	68841	1.73292	21.4015	1.76013	0.0864188	2.02232	0.0134685	0.995813	0.492412	86.2443	0.853112	84.1618	1.63339	25.4426	NA	86.2	0.85		-2.5	rev discord.
Spot 28	500.879	551.906	30742.6	2.30672	20.7706	1.49399	0.0890838	1.93229	0.0135284	1.19438	0.618114	86.6249	1.02771	86.6495	1.60487	87.3495	36.018	86.63	1.03		0.03	concordant
Spot 278	928.448	959.516	179911	7.02269	20.9439	0.944881	0.0902694	1.49846	0.0137147	1.16298	0.776116	87.8097	1.01429	87.7543	1.25975	86.269	22.4081	87.81	1.01		-0.066	concordant
Spot 220	1447.29	1633.35	87365.6	1.82802	20.8378	0.919437	0.091188	1.41201	0.0138092	1.0662	0.755097	88.4109	0.936203	88.6094	1.19813	93.9566	21.9205	88.42	0.94		0.23	concordant
Spot 161	225.637	246.9	18477.5	2.49373	20.708	1.58818	0.0920181	1.96522	0.014027	0.943024	0.479857	89.7957	0.840925	89.3816	1.68145	78.3144	40.9635	89.79	0.84		-0.48	concordant
Spot 290	539.872	640.162	60373.9	1.26503	20.987	1.58602	0.0921979	2.01551	0.0140911	1.24302	0.616727	90.2033	1.11344	89.5488	1.72757	72.1259	37.7275	90.18	1.11		-0.76	concordant
Spot 265	376.777	402.613	24084.3	3.42708	21.0842	1.15912	0.0914642	1.52987	0.0141406	0.990117	0.647192	90.518	0.889971	88.8664	1.30174	44.7285	27.8957	90.45	0.89		-1.9	rev discord.
Spot 230	193.884	212.44	16028.1	2.45541	21.2035	1.91313	0.0906906	2.11274	0.0141854	0.871099	0.412307	90.8025	0.785435	88.1465	1.78377	16.7795	NA	90.76	0.78		-3.1	rev discord.
Spot 306	170.02	190.246	42895.8	1.97533	20.7708	2.87038	0.0942865	3.10334	0.0142795	1.17865	0.3798	91.4006	1.06969	91.4886	2.71506	93.7875	67.9874	91.4	1.07		0.1	concordant
Spot 213	450.161	482.349	372283	3.28659	20.8089	1.46095	0.0950607	1.75935	0.0143174	0.980284	0.557185	91.6412	0.891989	92.2067	1.55076	106.889	34.5141	91.65	0.89		0.64	concordant
Spot 315	229.631	239.36	9145.68	5.54655	21.2304	1.81297	0.0902589	2.0087	0.0143845	0.839024	0.417696	92.0676	0.766979	87.7445	1.68851	NA	NA	91.98	0.77		-5	rev discord.
Spot 72	540.591	585.892	68919.2	2.80435	20.8011	1.16516	0.0958248	1.88413	0.0144604	1.47486	0.782782	92.5503	1.35524	92.9149	1.67293	102.311	27.725	92.57	1.35		0.41	concordant
Spot 283	453.279	490.91	55347.2	2.83069	20.5786	1.49271	0.0967414	2.20914	0.014481	1.6281	0.736983	92.6809	1.49814	93.7639	1.97862	121.423	35.1596	92.72	1.5		1.2	concordant
Spot 207	477.306	523.792	125817	2.41295	20.8513	1.31225	0.0958818	1.54527	0.0144999	0.815402	0.527678	92.8015	0.751285	92.9678	1.37279	97.214	31.0804	92.8	0.75		0.19	concordant
Spot 272	874.513	959.8	77307.9	2.40964	21.3111	1.04545	0.0963403	1.61217	0.0149377	1.22691	0.761028	95.5825	1.16406	93.3925	1.43848	37.7815	25.0256	95.37	1.16		-2.4	rev discord.
Spot 135	673.364	758.23	67187.3	1.86457	20.6053	1.2839	0.0999158	1.7373	0.0150111	1.16951	0.673175	96.0485	1.11497	96.6987	1.60243	112.747	30.3412	96.07	1.11		0.71	concordant
Spot 154	247.124	265.189	15719.9	3.21482	20.6674	1.80932	0.0986956	2.29385	0.0150752	1.30416	0.568544	96.4556	1.24857	95.5716	2.09226	73.561	44.8594	96.43	1.25		-0.96	concordant
Spot 170	503.073	575.256	54135	1.6378	21.1296	1.13113	0.0980508	1.86211	0.015105	1.4784	0.793937	96.6447	1.41814	94.9754	1.68836	53.2297	27.0026	96.47	1.41		-1.8	rev discord.
Spot 250	1442.41	1474.62	45231.1	10.524	20.3447	1.02887	0.101919	1.61457	0.015115	1.21759	0.754128	96.7083	1.16873	98.5463	1.51633	143.251	24.8774	96.76	1.17		2	concordant		high U/Th
Spot 66	319.1	348.057	15236.5	2.5897	20.8369	1.37655	0.0984124	1.59028	0.0151295	0.785114	0.493696	96.8004	0.754316	95.3099	1.44673	58.1438	32.9753	96.77	0.75		-1.6	concordant
Spot 238	817.773	883.846	102877	2.90857	20.7978	1.14404	0.10029	1.59451	0.0151336	1.10881	0.695388	96.8264	1.06559	97.0441	1.47574	102.373	27.108	96.83	1.06		0.24	concordant
Spot 98	1017.36	1079.54	64888	3.84521	20.7868	0.855726	0.100471	1.63162	0.0151568	1.38914	0.851384	96.9738	1.33702	97.2113	1.51256	103.062	20.2343	97	1.33		0.26	concordant
Spot 94	1534.02	1683.69	98040.9	2.40852	20.5313	0.893881	0.10241	1.50632	0.0152342	1.2114	0.80421	97.4656	1.17182	98.9986	1.42085	136.054	21.0343	97.53	1.17		1.6	concordant
Spot 105	390.74	424.29	41481.4	2.73687	19.8138	1.93673	0.105689	2.2716	0.0152557	1.1804	0.519633	97.6019	1.14341	102.014	2.20475	206.37	45.0427	97.59	1.14		4.6	discord.
Spot 49	708.705	785.901	29374.4	2.15746	21.0103	1.07358	0.101039	1.75359	0.0155127	1.3655	0.778685	99.2339	1.34466	97.7349	1.63398	61.2933	26.2383	99.09	1.34		-1.6	concordant
Spot 165	671.305	731.614	25615.2	2.61583	20.7952	1.2771	0.103072	1.80604	0.0156968	1.2433	0.688408	100.402	1.23862	99.6082	1.71355	80.6303	31.0877	100.36	1.24		-0.83	concordant
Spot 215	520.932	626.249	59478.1	1.16239	21.1266	1.08019	0.102498	1.73468	0.0157406	1.35718	0.782378	100.68	1.35579	99.0799	1.63753	60.7375	25.7685	100.52	1.35		-1.7	rev discord.
Spot 139	506.917	549.778	611887	2.77933	20.9833	1.37996	0.103476	2.03066	0.0157541	1.48972	0.733614	100.766	1.48945	99.9797	1.93349	81.2569	32.7746	100.72	1.49		-0.82	concordant
Spot 14	706.737	755.97	74408.3	3.3734	20.9272	1.31739	0.104105	1.83093	0.0158393	1.27087	0.694112	101.306	1.27741	100.559	1.75293	82.8471	31.2814	101.27	1.28		-0.78	concordant
Spot 129	1217.59	1402.13	44275.2	1.55049	20.8975	1.05227	0.103854	1.61918	0.0158565	1.20619	0.74494	101.415	1.21369	100.328	1.54681	74.5518	25.6972	101.34	1.21		-1.1	concordant
Spot 289	599.438	666.355	149235	2.10511	20.7467	1.57492	0.10553	2.03322	0.0158883	1.28551	0.632254	101.617	1.29606	101.869	1.97071	107.77	37.207	101.62	1.3		0.26	concordant
Spot 36	405.296	509.812	60860.3	0.911283	20.6417	1.09668	0.105845	1.85149	0.0159044	1.49141	0.805517	101.72	1.50515	102.157	1.7994	112.388	25.8873	101.75	1.5		0.45	concordant
Spot 86	723.664	779.62	74780.6	3.03919	20.7945	1.4018	0.106008	1.90796	0.0159947	1.2897	0.675956	102.293	1.30885	102.307	1.85686	102.631	33.2449	102.29	1.31		0.015	concordant
Spot 309	2240.48	2506.14	374683	1.98191	18.3988	1.47569	0.12061	1.78676	0.0160762	1.00737	0.563795	102.809	1.02745	115.625	1.95266	388.148	33.1268	102.37	1.03		12	discord.
Spot 57	94.2217	101.301	8315.02	3.1277	20.3708	2.49209	0.10532	2.82031	0.0160785	1.09814	0.389367	102.824	1.12019	101.675	2.72867	74.8176	61.7603	102.81	1.12		-1.2	concordant
Spot 3	545.209	608.663	55243.7	2.01917	20.8923	1.16339	0.106601	1.81374	0.0162137	1.37798	0.759741	103.682	1.41729	102.852	1.7741	83.6323	27.9738	103.62	1.41		-0.85	concordant
Spot 210	276.079	296.393	32679.8	3.19387	20.783	1.51899	0.107392	1.75637	0.016294	0.878837	0.500371	104.191	0.908313	103.577	1.72949	89.4842	36.0213	104.18	0.91		-0.62	concordant
Spot 261	432.239	491.887	157774	1.70294	21.1335	1.37944	0.106503	1.66579	0.0163342	0.933625	0.560469	104.446	0.96728	102.762	1.62803	63.8564	32.8569	104.4	0.97		-1.7	rev discord.
Spot 303	1052.52	1189.13	45142.5	1.81064	21.3269	1.01401	0.106757	1.74426	0.0166086	1.41877	0.813398	106.187	1.49421	102.995	1.70838	29.7541	24.3232	105.67	1.48		-3.2	rev discord.
Spot 236	325.766	363.497	41424.1	2.02899	21.1088	1.07504	0.107676	1.48677	0.01656	1.02121	0.686863	105.879	1.07241	103.837	1.46751	57.2131	25.7439	105.75	1.07		-2	rev discord.
Spot 114	410.926	442.558	59532	3.05277	21.3768	1.304	0.107086	1.56654	0.0166631	0.866034	0.552832	106.532	0.915023	103.297	1.5386	29.281	NA	106.41	0.91		-3.2	rev discord.
Spot 67	907.83	965.777	103370	3.68165	20.6833	0.951111	0.113413	1.48437	0.0170077	1.13692	0.765924	108.717	1.22565	109.083	1.53526	117.082	22.4916	108.74	1.22		0.35	concordant
Spot 296	1639.56	1741.72	58717.7	3.77171	20.6961	1.03764	0.116177	1.55806	0.0175122	1.16071	0.744972	111.914	1.28778	111.601	1.64665	104.906	24.581	111.89	1.29		-0.3	concordant
Spot 142	549.734	596.796	206309	2.74505	20.735	0.988136	0.116643	1.56491	0.0175659	1.21347	0.775426	112.254	1.35038	112.024	1.65984	107.175	23.3458	112.24	1.35		-0.22	concordant
Spot 93	236.238	261.917	6290.91	2.16187	20.5523	1.73087	0.113828	1.87159	0.017755	0.687887	0.367541	113.452	0.773593	109.461	1.94211	23.4879	NA	113.39	0.77		-3.8	rev discord.
Spot 24	1716.74	1766.24	98920.9	8.14988	20.7561	0.871446	0.119147	1.4712	0.0179501	1.18492	0.805411	114.688	1.34694	114.298	1.59037	106.181	20.6037	114.65	1.34		-0.36	concordant
Spot 12	445.453	505.559	19075.7	1.74162	20.6229	1.16297	0.121323	1.49036	0.0183794	0.920227	0.617452	117.405	1.07062	116.271	1.63732	93.0814	27.7814	117.36	1.07		-1	concordant
Spot 134	850.732	894.383	57141.5	4.58004	20.6578	1.106	0.122871	1.74724	0.0185218	1.35046	0.772911	118.307	1.58311	117.671	1.94133	104.813	26.2084	118.25	1.58		-0.57	concordant
Spot 39	2315.1	3277.46	174021	0.565326	20.7276	0.856938	0.13375	1.3142	0.0201069	0.996005	0.757877	128.332	1.26555	127.462	1.57424	111.302	20.2272	128.26	1.26		-0.72	concordant
Spot 276	599.074	658.843	48797.5	2.35543	20.8137	1.05046	0.142578	1.63665	0.0216399	1.2527	0.765403	138.012	1.7105	135.338	2.07374	88.6931	24.971	137.69	1.7		-2.1	rev discord.
Spot 258	199.715	217.714	38076.9	2.60748	20.3227	1.36855	0.146236	1.68241	0.0216971	0.972577	0.578085	138.372	1.33144	138.583	2.17943	142.206	32.219	138.38	1.33		0.16	concordant
Spot 271	132.815	147.662	27373.7	2.10228	19.6107	1.74095	0.153264	2.01449	0.0220104	1.0123	0.502509	140.349	1.4054	144.79	2.71836	218.178	40.3247	140.39	1.41		3.3	concordant
Spot 227	361.377	430.041	25755.9	1.2368	20.4542	1.08013	0.149757	1.81652	0.0224411	1.43941	0.792403	143.065	2.03662	141.697	2.40243	118.828	26.101	142.89	2.03		-1	concordant
Spot 47	148.98	179.206	73568.8	1.15831	19.7371	1.64078	0.156489	1.89656	0.022422	0.950582	0.501214	142.945	1.34386	147.625	2.60578	223.457	37.9618	142.98	1.34		3.5	concordant
Spot 145	79.9799	91.9349	16579.7	1.57218	20.5771	2.93051	0.147817	3.13645	0.0224566	1.05364	0.335935	143.163	1.4918	139.982	4.1013	86.4039	70.0886	143.13	1.49		-2.4	rev discord.
Spot 167	160.871	185.753	13192.3	1.51934	20.4589	1.34674	0.148949	1.65263	0.0225651	0.951486	0.575742	143.847	1.35353	140.984	2.17542	93.028	32.005	143.72	1.35		-2.2	rev discord.
Spot 243	1042.58	1122.76	58545.8	3.05563	18.3596	1.24056	0.171048	2.04035	0.0228508	1.61901	0.793495	145.648	2.33162	160.328	3.02608	383.059	27.8908	144.6	2.35		10	discord.
Spot 38	97.6547	102.301	18105.1	4.93965	19.8603	2.28485	0.155738	2.54672	0.0227704	1.09206	0.428811	145.141	1.56732	146.965	3.48456	176.486	53.6639	145.16	1.57		1.3	concordant
Spot 97	99.0765	116.601	13268.9	1.3286	20.5804	2.26943	0.149906	2.66852	0.0228058	0.93044	0.348673	145.364	1.33739	141.829	3.53232	83.053	59.3617	145.32	1.34		-2.6	rev discord.
Spot 184	165.858	173.046	5776.31	5.42244	20.9841	1.28133	0.143624	1.72755	0.0230257	1.15423	0.668133	146.75	1.6747	136.267	2.20295	NA	NA	145.34	1.65		-7.9	rev discord.
Spot 99	75.1062	82.9136	17888.4	2.26066	19.9474	1.62192	0.155731	2.05671	0.0228123	1.25999	0.612626	145.405	1.81159	146.96	2.81399	172.099	37.9521	145.45	1.81		1.1	concordant
Spot 195	120.945	128.456	68271.6	3.78453	20.3459	2.104	0.154979	2.24269	0.0228959	0.76557	0.341362	145.932	1.10466	146.298	3.05562	152.259	49.4115	145.94	1.1		0.27	concordant
Spot 106	86.2065	100.425	19105.6	1.4248	15.0728	3.72007	0.209334	3.89809	0.0230873	1.09794	0.281662	147.138	1.5972	192.994	6.85145	798.744	78.411	146.47	1.6		29	discord.
Spot 102	64.3039	74.3144	5653	1.50957	20.3398	2.28213	0.148564	3.66646	0.0230663	1.10845	0.302321	147.006	1.61104	140.643	4.81547	34.5804	NA	146.93	1.61		-4.7	rev discord.
Spot 23	140.551	149.001	18379.8	3.90863	20.425	2.31133	0.153694	2.63018	0.0230932	0.938989	0.357006	147.175	1.36631	145.168	3.55782	112.479	57.9799	147.15	1.37		-1.5	concordant
Spot 108	203.947	216.88	16117.6	3.70579	20.9005	1.79077	0.151443	2.0797	0.0233519	1.0331	0.496752	148.805	1.51969	143.186	2.77741	51.0386	43.0931	148.59	1.52		-4.1	rev discord.
Spot 313	90.1291	96.5495	7883.59	3.29892	20.4287	1.60461	0.153685	2.32604	0.0236661	1.01776	0.43755	150.784	1.51681	145.161	3.14625	54.19	49.9072	150.63	1.51		-4.1	rev discord.
Spot 118	63.3126	68.4196	17181.7	2.91338	20.105	2.45313	0.160018	2.80987	0.0237208	1.29762	0.461806	151.129	1.93826	150.719	3.93572	144.26	58.4711	151.12	1.94		-0.29	concordant
Spot 88	338.121	363.296	14595	3.15624	20.4098	0.999403	0.159009	1.46666	0.0239365	1.00216	0.683291	152.487	1.51022	149.835	2.04313	108.082	25.3	152.28	1.5		-1.9	rev discord.
Spot 60	757.728	861.887	209508	1.70957	20.4127	0.996208	0.164232	1.67904	0.0242596	1.35155	0.804954	154.52	2.06359	154.4	2.40497	152.55	23.3269	154.51	2.06		-0.084	concordant
Spot 131	658.821	745.289	191556	1.79054	20.0461	0.98595	0.166412	1.57156	0.0242402	1.22377	0.778699	154.399	1.86704	156.301	2.27664	185.207	22.982	154.56	1.87		1.3	concordant
Spot 30	675.525	771.96	249072	1.64616	20.5056	1.04161	0.16429	1.49405	0.0244202	1.07101	0.716849	155.532	1.64582	154.451	2.14064	137.913	24.4632	155.44	1.64		-0.75	concordant
Spot 287	596.063	673.804	120350	1.80181	20.5392	0.88735	0.164218	1.40851	0.0244882	1.09348	0.776337	155.959	1.68491	154.389	2.01733	130.353	20.8849	155.76	1.68		-1.1	concordant
Spot 186	352.027	375.747	20817.4	3.48755	20.0992	1.18094	0.166138	1.87852	0.0244727	1.45583	0.774988	155.861	2.24187	156.062	2.71748	159.12	27.7659	155.88	2.24		0.14	concordant
Spot 127	269.454	285.047	45337.3	4.06104	20.3951	1.44955	0.164401	1.74708	0.0244848	0.935752	0.535608	155.938	1.44169	154.548	2.50465	133.283	34.6753	155.89	1.44		-0.96	concordant
Spot 15	223.108	238.99	10888.2	3.30134	19.7081	1.51546	0.167009	1.72322	0.0244824	0.81685	0.474024	155.922	1.25837	156.82	2.50402	170.373	35.4193	155.94	1.26		0.62	concordant
Spot 164	546.177	609.342	727752	2.03203	20.4545	1.03507	0.165816	1.58845	0.0245508	1.20491	0.758544	156.353	1.86126	155.782	2.29405	147.073	24.2721	156.3	1.85		-0.39	concordant
Spot 120	170.241	181.163	13657.4	3.66307	20.1864	1.39828	0.164348	1.70188	0.0245972	0.88114	0.517745	156.645	1.36363	154.502	2.43916	121.75	34.2846	156.58	1.36		-1.5	concordant
Spot 153	574.466	618.903	995518	3.03799	20.6129	1.09728	0.164916	1.63247	0.02465	1.2087	0.740409	156.977	1.87446	154.997	2.34663	124.807	25.8445	156.77	1.87		-1.4	concordant
Spot 194	158.079	173.977	246754	2.3366	20.46	1.40291	0.166464	1.84607	0.0246518	1.19986	0.649953	156.989	1.86089	156.346	2.67503	146.635	32.889	156.95	1.86		-0.44	concordant
Spot 256	1007.49	1092.26	66930.2	2.79314	20.2451	0.75656	0.167525	1.48945	0.0246673	1.28257	0.861102	157.086	1.99039	157.269	2.17005	160.046	17.7155	157.12	1.98		0.13	concordant
Spot 136	231.871	250.54	16189.7	2.91868	20.3454	1.25478	0.164178	1.74577	0.024702	1.03254	0.591451	157.304	1.60457	154.354	2.49986	109.27	33.2538	157.15	1.6		-2	rev discord.
Spot 44	622.211	697.372	152969	1.94541	20.4276	0.801611	0.166972	1.42144	0.0247249	1.17334	0.825458	157.448	1.82502	156.788	2.06511	146.841	18.7931	157.34	1.81		-0.45	concordant
Spot 133	650.524	769.872	48382.5	1.2809	20.4886	1.04525	0.165508	1.67214	0.0247777	1.30274	0.779087	157.78	2.03052	155.513	2.41105	121.102	24.7216	157.47	2.02		-1.6	concordant
Spot 29	342.46	387.995	38808.7	1.76741	20.0116	1.23969	0.169361	1.52529	0.0247254	0.84783	0.555847	157.452	1.31875	158.864	2.2431	179.957	29.5345	157.49	1.32		0.96	concordant
Spot 141	426.022	468.114	110225	2.3785	20.0466	1.04838	0.169607	1.37575	0.0247234	0.890485	0.647271	157.439	1.38499	159.078	2.0257	183.526	24.4446	157.51	1.38		1.1	concordant
Spot 314	184.666	208.875	143625	1.79262	20.1406	1.67967	0.169074	1.94334	0.0247381	0.977369	0.502933	157.532	1.52101	158.615	2.85374	174.804	39.2104	157.55	1.52		0.74	concordant
Spot 53	205.336	220.377	80486	3.20835	20.5383	1.75451	0.166226	2.02222	0.0247687	1.00543	0.49719	157.724	1.56656	156.139	2.92668	132.147	41.2409	157.68	1.56		-1.1	concordant
Spot 281	361.622	393.507	57318.7	2.66523	20.1568	1.04104	0.168902	1.42617	0.0247685	0.972459	0.681866	157.723	1.51518	158.466	2.09247	169.563	24.3845	157.76	1.51		0.51	concordant
Spot 202	254.42	276.46	17620.7	2.7127	20.475	1.10658	0.16465	1.54842	0.0248222	0.851969	0.550217	158.061	1.33025	154.765	2.22273	104.593	30.5765	157.92	1.33		-2.3	rev discord.
Spot 143	842.877	957.732	49208	1.72458	20.1951	1.12353	0.168427	1.77061	0.024817	1.36547	0.771187	158.028	2.13159	158.053	2.59157	158.405	26.3641	158.03	2.12		0.017	concordant
Spot 42	1145.29	1287.78	98026.8	1.88884	20.449	0.919798	0.167336	1.3876	0.0248578	1.0383	0.74827	158.284	1.62346	157.104	2.01971	139.352	21.6201	158.16	1.62		-0.81	concordant
Spot 160	239.76	260.901	31113.3	2.66505	20.5836	1.19256	0.165308	1.55642	0.024876	0.924579	0.594044	158.399	1.44668	155.339	2.24187	108.903	29.5696	158.24	1.44		-2.1	rev discord.
Spot 45	353.026	385.565	403487	2.54958	20.4155	1.19037	0.168228	1.66339	0.0248657	1.16184	0.698477	158.334	1.81718	157.88	2.43218	151.073	27.8939	158.3	1.81		-0.31	concordant
Spot 190	666.246	722.244	38355	2.79592	20.2614	1.05235	0.16855	1.65362	0.024871	1.23351	0.745942	158.367	1.92967	158.16	2.42186	155.08	25.7751	158.35	1.92		-0.14	concordant
Spot 260	542.416	585.257	134804	2.97536	20.3614	1.00597	0.168353	1.67072	0.0248828	1.3338	0.798338	158.442	2.08753	157.989	2.44444	151.201	23.5525	158.38	2.08		-0.31	concordant
Spot 206	219.094	247.62	75011	1.80487	20.4914	1.0917	0.167422	1.44894	0.0249213	0.952171	0.657151	158.684	1.49249	157.18	2.10992	134.561	25.6576	158.59	1.49		-1	concordant
Spot 113	1051.81	1260.01	112405	1.18723	20.4287	0.755863	0.168368	1.5922	0.0249553	1.40128	0.880092	158.898	2.19939	158.002	2.32975	144.569	17.7128	158.66	2.18		-0.62	concordant
Spot 59	263.64	281.729	16854.3	3.42505	20.7069	1.23134	0.16395	1.62322	0.0249846	1.04818	0.645741	159.082	1.64706	154.155	2.32159	79.0323	29.4151	158.68	1.64		-3.4	rev discord.
Spot 189	382.996	429.014	29765.1	1.95583	20.4634	1.05838	0.166895	1.42155	0.0249379	0.799187	0.562195	158.788	1.25351	156.721	2.06445	125.552	27.668	158.7	1.25		-1.4	concordant
Spot 255	363.428	392.201	28953.1	2.96826	20.4938	0.987826	0.166479	1.44541	0.0249643	1.02453	0.708814	158.954	1.60862	156.359	2.09462	117.183	24.0582	158.71	1.6		-1.8	rev discord.
Spot 297	130.335	136.567	9547.91	4.91483	20.4575	1.67071	0.163396	1.89366	0.0250098	0.797379	0.421077	159.24	1.25419	153.672	2.70053	68.6215	40.8793	159.1	1.25		-3.8	rev discord.
Spot 119	545.465	595.943	70231	2.53941	20.2259	1.07292	0.169668	1.66088	0.0249951	1.26732	0.76304	159.148	1.99222	159.13	2.44628	158.895	25.1097	159.15	1.99		-0.012	concordant
Spot 177	464.458	516.447	79666.3	2.09943	19.9714	1.07791	0.171984	1.67335	0.0249784	1.27971	0.764756	159.043	2.01038	161.14	2.49336	192.09	25.077	159.2	2.01		1.4	concordant
Spot 52	232.09	248.529	58079.9	3.31779	20.2889	1.20468	0.169713	1.55522	0.0250166	0.982734	0.631894	159.283	1.54615	159.17	2.29118	157.508	28.2031	159.28	1.54		-0.077	concordant
Spot 221	388.665	421.99	64649.6	2.74078	20.0922	2.03168	0.171134	2.19761	0.0250152	0.833793	0.37941	159.275	1.31175	160.403	3.26071	177.075	47.4368	159.29	1.31		0.76	concordant
Spot 90	159.168	169.443	23838	3.64019	20.5726	1.76722	0.166713	2.01943	0.0250941	0.968365	0.479524	159.771	1.52815	156.562	2.92998	108.272	41.841	159.68	1.53		-2.2	rev discord.
Spot 159	281.953	321.264	36642.5	1.68549	20.3272	1.20198	0.169151	1.48301	0.0250971	0.855685	0.576992	159.789	1.35049	158.682	2.17861	142.203	28.4182	159.74	1.35		-0.75	concordant
Spot 286	189.966	203.967	135848	3.1884	20.7125	1.33899	0.167153	1.69469	0.0251295	1.03879	0.61297	159.993	1.64154	156.945	2.46438	111.203	31.6097	159.81	1.64		-2.1	rev discord.
Spot 249	225.942	238.269	50003.7	4.3074	20.5485	1.66726	0.167823	1.97369	0.0251299	1.05563	0.53485	159.996	1.66818	157.528	2.87996	120.567	39.3149	159.9	1.66		-1.7	rev discord.
Spot 70	1203.78	1475.81	450229	1.0399	20.287	0.687695	0.171023	1.38315	0.0251044	1.20006	0.86763	159.836	1.89455	160.306	2.05111	167.244	16.0554	159.93	1.88		0.32	concordant
Spot 130	553.437	594.929	50976.2	3.13454	20.5791	1.1273	0.167786	1.61569	0.0252016	1.1533	0.713813	160.447	1.8276	157.496	2.35713	113.336	26.6895	160.15	1.82		-2	rev discord.
Spot 155	280.635	329.196	16079.2	1.35806	20.6043	1.39024	0.165931	1.75953	0.0252545	1.05791	0.601244	160.779	1.67986	155.881	2.54262	82.0322	33.3944	160.46	1.67		-3.3	rev discord.
Spot 307	650.082	700.837	133115	3.00994	20.3811	0.851778	0.170716	1.37575	0.0252452	1.08008	0.785088	160.721	1.71446	160.04	2.03701	149.974	19.9693	160.64	1.71		-0.46	concordant
Spot 252	125.345	132.518	7798.04	4.10645	18.0042	3.16302	0.187975	3.3314	0.0253637	1.04083	0.31243	161.466	1.65971	174.9	5.35246	360.606	71.4019	161.44	1.66		8.7	discord.
Spot 128	978.793	1032.58	247553	4.2761	20.5247	0.937593	0.170392	1.53274	0.0254073	1.21247	0.791048	161.74	1.93666	159.759	2.26578	130.489	22.0785	161.45	1.92		-1.3	concordant
Spot 95	240.696	257.003	151509	3.46861	20.0207	1.45506	0.175161	1.67576	0.0253793	0.830774	0.49576	161.564	1.32555	163.888	2.53619	197.609	33.8131	161.61	1.33		1.5	concordant
Spot 21	1110.33	1220.03	150693	2.37857	20.4007	0.809035	0.171867	1.53131	0.0254211	1.29977	0.848798	161.827	2.0772	161.038	2.28038	149.463	18.9653	161.67	2.06		-0.53	concordant
Spot 175	229.617	258.702	99505.8	1.85522	20.3366	1.25643	0.17194	1.50806	0.0254114	0.833998	0.553027	161.766	1.33234	161.101	2.24658	151.351	29.4244	161.74	1.33		-0.44	concordant
Spot 282	586.382	624.515	104171	3.61374	20.7025	1.00489	0.16973	1.68831	0.0255062	1.35659	0.803518	162.362	2.17508	159.185	2.48746	112.153	23.6977	161.8	2.15		-2.1	rev discord.
Spot 274	261.537	291.143	23348.5	2.076	19.9418	1.40463	0.173765	1.6722	0.0254247	0.900954	0.538785	161.849	1.44003	162.681	2.51361	174.784	32.857	161.87	1.44		0.55	concordant
Spot 157	163.975	179.187	23240.6	2.53324	20.5437	1.61148	0.168908	1.9666	0.0254796	1.11552	0.567235	162.194	1.78674	158.471	2.88547	103.139	38.3006	162.01	1.78		-2.5	rev discord.
Spot 110	380.116	399.754	32452	4.54861	20.4949	1.43193	0.170434	1.81633	0.0254971	1.11685	0.614893	162.304	1.79007	159.795	2.68557	122.744	33.7256	162.16	1.78		-1.7	rev discord.
Spot 62	589.884	628.895	49707	3.55342	20.4333	0.979118	0.171829	1.65865	0.0255086	1.3177	0.794443	162.377	2.11291	161.005	2.46954	140.877	23.6263	162.18	2.1		-0.92	concordant
Spot 228	101.313	107.654	23613.3	3.75488	20.2857	1.89472	0.171732	2.25648	0.0255354	1.21729	0.539463	162.545	1.9539	160.921	3.35804	137.108	44.6202	162.49	1.95		-1.1	concordant
Spot 182	1182.66	1342.4	653899	1.73989	19.9013	1.18958	0.177136	1.59244	0.0255134	1.05867	0.664806	162.407	1.69787	165.593	2.43318	211.361	27.5905	162.53	1.7		2.1	concordant
Spot 269	327.883	355.686	57767.6	2.77137	20.4519	1.06318	0.172469	1.36794	0.025679	0.860025	0.628699	163.448	1.38802	161.559	2.04319	133.984	24.9942	163.34	1.38		-1.3	concordant
Spot 58	328.28	355.077	28973.2	2.8789	20.5528	1.2769	0.171344	1.76788	0.0257059	1.21702	0.688408	163.617	1.96619	160.584	2.62583	116.08	30.243	163.35	1.96		-2	rev discord.
Spot 223	202.063	230.448	558408	1.67292	19.7368	1.84437	0.179385	2.02483	0.0256623	0.835596	0.412676	163.343	1.34774	167.531	3.12716	227.136	42.623	163.38	1.35		2.7	concordant
Spot 242	202.385	220.543	25540.9	2.61924	20.6367	1.4962	0.169987	1.84826	0.0257005	0.902162	0.488115	163.583	1.45722	159.408	2.72665	97.8343	38.1696	163.44	1.45		-2.8	rev discord.
Spot 217	321.018	346.245	46399.8	2.99048	20.189	1.09474	0.17519	1.5103	0.0257397	1.02858	0.681042	163.829	1.66388	163.913	2.2861	165.097	25.8545	163.83	1.66		0.055	concordant
Spot 263	222.381	249.455	40453.8	1.93026	17.5489	2.06675	0.201892	2.30434	0.0257963	0.988974	0.42918	164.185	1.60324	186.726	3.93036	482.335	45.9982	163.85	1.61		14	discord.
Spot 96	1679.64	1696.56	1.84123e+06	23.3232	20.3222	0.597028	0.176055	1.19738	0.0258584	1.03792	0.866825	164.575	1.68654	164.661	1.82005	165.863	13.9392	164.59	1.67		0.056	concordant		high U/Th
Spot 253	243.786	256.367	232530	4.5536	20.8001	1.27105	0.171787	1.53072	0.0259132	0.852908	0.557195	164.92	1.38877	160.969	2.27859	103.248	30.0588	164.73	1.38		-2.6	rev discord.
Spot 1	322.93	344.799	24642.9	3.47005	20.4382	1.18427	0.173238	1.64251	0.0259494	1.13352	0.690115	165.147	1.8482	162.225	2.46262	119.787	28.0109	164.89	1.84		-1.9	rev discord.
Spot 103	132.651	143.475	83218.8	2.88014	20.074	2.09598	0.177945	2.3337	0.0259099	1.02212	0.43798	164.899	1.66408	166.29	3.57962	186.117	48.8591	164.92	1.66		0.91	concordant
Spot 305	383.786	425.749	62145.9	2.14926	20.0266	1.13117	0.178717	1.46484	0.0260336	0.918492	0.627027	165.676	1.50233	166.956	2.25516	185.121	26.5498	165.73	1.5		0.83	concordant
Spot 92	127.241	134.661	17403.8	4.0298	20.0991	1.85158	0.176664	2.15246	0.0260924	1.05917	0.492072	166.045	1.73624	165.186	3.28142	152.879	43.9122	166.02	1.73		-0.56	concordant
Spot 121	301.728	340.184	13398.7	1.84381	20.336	1.32629	0.174207	1.57036	0.026282	0.821657	0.523228	167.237	1.35644	163.064	2.36565	102.904	31.6586	167.06	1.35		-2.7	rev discord.
Spot 16	221.989	243.781	26725.1	2.39386	19.8486	1.0952	0.180892	1.2693	0.0262824	0.6001	0.47278	167.239	0.990696	168.828	1.97426	191.18	26.0373	167.27	0.99		1	concordant
Spot 310	374.173	403.057	25559.6	3.04428	20.3238	1.32836	0.177748	1.5838	0.0264999	0.828952	0.523396	168.605	1.37954	166.121	2.42707	130.892	31.74	168.52	1.38		-1.6	concordant
Spot 61	253.375	284.227	21473.5	1.93001	20.0487	1.20784	0.180602	1.59685	0.0265113	0.778105	0.487274	168.677	1.29546	168.578	2.48036	167.169	32.5747	168.67	1.29		-0.064	concordant
Spot 196	493.75	571.031	195208	1.50143	20.2247	1.1735	0.181484	1.70548	0.0265756	1.23749	0.725596	169.081	2.06515	169.336	2.66003	172.892	27.3674	169.1	2.06		0.16	concordant
Spot 197	812.121	870.05	41813.9	3.29453	20.2752	0.767877	0.180696	1.51022	0.0266763	1.29859	0.859868	169.713	2.17512	168.659	2.34684	153.885	18.039	169.46	2.15		-0.68	concordant
Spot 69	863.116	1052.41	29646.4	1.07153	20.452	0.891874	0.181161	1.7267	0.027066	1.47834	0.856164	172.159	2.51142	169.059	2.68908	125.903	21.0263	171.31	2.47		-2	rev discord.
Spot 22	41.4377	45.3198	8785.63	2.50838	21.1038	2.37854	0.170607	2.76269	0.0270114	0.991066	0.358732	171.817	1.68032	159.945	4.08837	NA	NA	171.5	1.68		-7.7	rev discord.
Spot 225	1199.6	1396.29	376733	1.43326	19.975	0.876682	0.186565	1.43553	0.0270033	1.13673	0.791857	171.766	1.92673	173.694	2.29182	200.01	20.3739	171.97	1.92		1.2	concordant
Spot 84	208.146	224.848	13240.9	2.92865	20.7746	1.79318	0.176736	2.08843	0.0271466	1.06746	0.511133	172.665	1.81867	165.248	3.18491	60.2881	42.8042	172.3	1.81		-4.8	rev discord.
Spot 233	313.909	344.636	29295.3	2.40077	20.3773	0.976006	0.183	1.29642	0.0272525	0.678347	0.523246	173.33	1.16011	170.639	2.03631	133.521	25.9531	173.23	1.16		-1.7	rev discord.
Spot 264	341.16	358.867	157846	4.52769	20.106	0.96537	0.188383	1.41567	0.0274544	1.03539	0.731374	174.597	1.78349	175.248	2.27865	184.027	22.4962	174.65	1.78		0.4	concordant
Spot 178	167.791	176.348	429327	4.60773	18.8712	1.56551	0.202754	1.78512	0.0277404	0.857811	0.480534	176.391	1.49259	187.454	3.05557	329.233	35.507	176.41	1.49		6.6	discord.
Spot 245	485.909	560.213	119986	1.53678	20.1608	0.80704	0.189635	1.63973	0.0277757	1.42733	0.870466	176.612	2.48662	176.318	2.65405	172.35	18.8453	176.54	2.46		-0.18	concordant
Spot 174	364.278	404.304	26017.9	2.13873	20.345	1.11328	0.187322	1.46345	0.0279344	0.930117	0.635563	177.607	1.62941	174.341	2.34439	130.281	26.5658	177.37	1.62		-2	rev discord.
Spot 226	220.82	243.067	26224.4	2.33252	20.2705	1.41555	0.188695	1.71143	0.0280127	0.960758	0.561379	178.098	1.68768	175.515	2.75853	140.864	33.2288	177.98	1.68		-1.6	concordant
Spot 267	395.586	429.687	142425	2.72611	20.5116	1.30807	0.188787	1.62726	0.0280867	0.967931	0.594821	178.562	1.70464	175.594	2.62396	135.791	30.7386	178.39	1.7		-1.8	rev discord.
Spot 81	546.419	590.687	116576	2.90068	20.0059	1.10666	0.196333	1.49088	0.0284522	0.998936	0.67003	180.854	1.78151	182.019	2.48437	197.183	25.7287	180.92	1.78		0.7	concordant
Spot 234	812.322	905.856	355842	2.04091	20.0897	0.894573	0.196254	1.55376	0.0285333	1.27039	0.817622	181.362	2.2719	181.951	2.58827	189.636	20.8267	181.45	2.26		0.35	concordant
Spot 132	108.239	118.766	212314	2.41629	20.6947	1.5705	0.19008	1.76869	0.0285807	0.813503	0.459946	181.659	1.45718	176.698	2.86843	110.803	37.0969	181.5	1.45		-3	rev discord.
Spot 244	517.798	602.27	22581.7	1.44051	16.7832	3.60201	0.234033	3.86184	0.0287601	1.37824	0.356888	182.784	2.48382	213.523	7.43673	567.785	78.5534	182.4	2.49		17	discord.
Spot 251	386.051	420.867	322667	2.60574	20.2814	0.997438	0.196801	1.47031	0.0289293	1.08023	0.734693	183.844	1.95788	182.416	2.45496	163.936	23.2947	183.69	1.95		-0.85	concordant
Spot 212	1286.33	1439.81	834036	1.96961	20.1998	0.831486	0.198551	1.47525	0.0290152	1.2186	0.826031	184.382	2.21505	183.899	2.48148	177.679	19.3996	184.29	2.2		-0.29	concordant
Spot 5	457.441	512.653	222421	1.94702	19.4902	1.08084	0.205183	1.42821	0.0289824	0.933506	0.653618	184.177	1.69497	189.502	2.46895	256.379	24.8678	184.36	1.7		3.1	concordant
Spot 280	207.518	231.688	19402.1	2.01767	20.0562	1.17348	0.19781	1.44979	0.0291572	0.845594	0.583252	185.271	1.54435	183.272	2.43107	157.559	27.5412	185.17	1.54		-1.2	concordant
Spot 279	124.04	134.125	116447	2.89024	19.6338	2.02738	0.205038	2.2337	0.0292251	0.937607	0.419756	185.697	1.71627	189.381	3.85914	235.583	46.804	185.74	1.72		2.1	concordant
Spot 204	295.335	316.348	276106	3.30302	20.6391	1.11634	0.196693	1.46992	0.0293994	0.956231	0.650533	186.788	1.7605	182.324	2.45318	124.826	26.2909	186.4	1.75		-2.6	rev discord.
Spot 304	176.434	201.287	152360	1.66828	18.3839	1.90426	0.220284	2.3015	0.0293871	1.29225	0.561484	186.711	2.37817	202.146	4.21857	386.21	42.7783	186.63	2.39		8.7	discord.
Spot 144	274.482	307.87	163048	1.93194	20.4792	1.25167	0.20271	1.61987	0.0301443	1.02783	0.634515	191.452	1.93886	187.416	2.7722	136.891	29.3923	191.13	1.93		-2.3	rev discord.
Spot 115	1369.11	1508.1	499728	2.31483	20.0967	0.767325	0.207466	1.49865	0.0302064	1.28731	0.858977	191.84	2.43319	191.424	2.6146	186.279	17.8872	191.74	2.41		-0.24	concordant
Spot 257	176.222	187.002	34047.7	3.84126	20.0906	1.55197	0.207764	1.8615	0.0304884	1.01106	0.543141	193.604	1.92834	191.675	3.25149	167.956	36.5121	193.52	1.92		-1.1	concordant
Spot 148	411.723	459.253	67544.1	2.03566	18.8454	1.39234	0.223973	1.77933	0.0307179	1.10766	0.622515	195.04	2.12802	205.211	3.30606	323.712	31.6168	195.2	2.13		5.6	discord.
Spot 25	227.662	247.473	38668.3	2.70054	20.1671	1.13661	0.211126	1.52446	0.0310583	0.960643	0.630153	197.168	1.86541	194.497	2.69836	162.237	27.6804	196.98	1.86		-1.5	concordant
Spot 247	1160.55	1463.18	272915	0.901192	20.1847	0.722586	0.213014	1.35595	0.0311938	1.14732	0.846142	198.015	2.23734	196.079	2.41778	172.821	16.8792	197.52	2.21		-1.1	concordant
Spot 64	293.043	311.825	80425.3	3.66654	20.108	1.13574	0.216828	1.45307	0.0315994	0.903862	0.622034	200.55	1.78479	199.266	2.62909	184.073	26.4876	200.47	1.78		-0.71	concordant
Spot 232	346.703	377.234	366044	2.66863	19.3902	1.09966	0.224883	1.39954	0.0315626	0.865704	0.618565	200.32	1.70751	205.966	2.60902	271.052	25.2177	200.51	1.71		3.1	concordant
Spot 308	802.183	894.304	79218.8	2.04635	20.1539	0.712455	0.22572	1.25699	0.0330563	1.03439	0.822906	209.648	2.13369	206.66	2.35041	172.688	16.6459	208.93	2.1		-1.6	concordant
Spot 156	51.9607	63.9191	9747.61	1.0211	19.5435	2.33614	0.234974	2.61426	0.0342913	1.1661	0.446054	217.35	2.49227	214.296	5.0506	180.846	54.5197	217.26	2.49		-1.6	concordant
Spot 168	161.9	165.139	14521	11.7459	19.9577	1.92442	0.25954	2.16775	0.0382763	0.971867	0.448331	242.14	2.30963	234.296	4.53558	156.338	45.3577	241.82	2.3		-3.7	rev discord.		high U/Th
Spot 188	26.7333	27.808	6320.05	5.84546	20.6286	3.58213	0.267998	4.62921	0.0419622	2.90362	0.627239	264.984	7.53814	241.092	9.93489	14.3269	NA	260.7	7.35		-11	rev discord.
Spot 312	221.344	229.742	51706.6	6.19348	11.1474	2.76624	0.591149	3.15685	0.0479182	1.51728	0.48063	301.728	4.47256	471.601	11.9094	1414.3	52.96	289.46	4.44		54	discord.
Spot 241	122.552	134.842	114352	2.34343	18.924	1.25541	0.353219	1.59586	0.0485054	0.985238	0.617371	305.339	2.93818	307.139	4.22964	320.855	28.5408	305.49	2.93		0.68	concordant
Spot 104	400.412	441.188	49019.8	2.30768	18.7065	0.93754	0.413304	1.29878	0.0561947	0.872885	0.672083	352.442	2.99383	351.251	3.85656	343.39	21.7433	352.27	2.96		-0.4	concordant
Spot 78	142.301	164.245	35261.1	1.52388	11.5113	0.956925	0.757623	1.38011	0.0632678	0.972978	0.705	395.468	3.73217	572.638	6.04055	1357.15	18.8711	357.94	3.75		49	discord.
Spot 17	547.336	553.958	4.01331e+06	19.4227	18.3464	0.819188	0.498394	1.29584	0.0662063	1.00405	0.77483	413.259	4.01914	410.615	4.37653	395.753	18.3684	412.42	3.91		-0.77	concordant		high U/Th
Spot 111	232.829	258.03	140205	2.17114	18.1625	0.931433	0.50798	1.35371	0.0668456	0.98225	0.7256	417.124	3.96745	417.09	4.6303	416.884	20.8101	417.12	3.9		-0.0096	concordant
Spot 107	1152.22	1266.94	83678	2.36031	18.2054	0.653172	0.512385	1.23292	0.0677166	1.04568	0.848135	422.384	4.2752	420.051	4.24132	407.241	14.6162	421.15	4.08		-0.69	concordant
Spot 275	307.636	336.18	242925	2.53268	18.2093	1.01471	0.515581	1.24697	0.0681048	0.724725	0.581188	424.728	2.9789	422.195	4.30731	408.362	22.703	424.44	2.95		-0.72	concordant
Spot 74	391.355	437.587	195798	1.98927	18.2308	0.868784	0.516764	1.12049	0.0681344	0.707448	0.631374	424.906	2.90906	422.988	3.87627	412.522	19.4271	424.62	2.87		-0.55	concordant
Spot 34	986.336	1003.8	264102	13.2714	10.0596	0.528307	1.92832	1.45911	0.140609	1.36009	0.932136	848.106	10.8084	1090.96	9.75644	1614.06	9.83985	447.9	11.4		88	discord.		high U/Th
Spot 180	658.55	736.538	90655.4	1.9844	17.9734	0.921745	0.56155	1.62716	0.0732254	1.33809	0.822348	455.558	5.88539	452.535	5.94152	437.18	20.6208	454.11	5.62		-0.83	concordant
Spot 31	230.573	285.934	194258	0.978751	17.5809	1.08921	0.598623	1.45729	0.0762969	0.967987	0.664239	473.981	4.42347	476.359	5.54098	487.823	24.0387	474.42	4.36		0.61	concordant
Spot 231	1771.96	1820.73	612804	8.53846	10.6023	0.807364	1.37108	1.68047	0.105163	1.47382	0.877028	644.596	9.04067	876.627	9.86716	1519.27	15.2251	476.76	9.85		60	discord.
Spot 205	1344.34	1541.18	731350	1.60501	17.5768	0.641192	0.609202	1.40554	0.0774976	1.25077	0.889883	481.169	5.79919	483.057	5.40293	492.005	14.1465	482.7	5.4		0.54	concordant
Spot 193	603.456	738.107	225609	1.05318	17.3045	0.819386	0.664112	1.37412	0.0831358	1.10303	0.802715	514.813	5.45771	517.126	5.56825	527.38	17.9509	515.84	5.25		0.56	concordant
Spot 71	182.177	210.24	376996	1.52557	16.9816	0.822439	0.82452	1.16428	0.101292	0.824092	0.707811	621.977	4.88616	610.567	5.3425	568.479	17.8938	617.86	4.65		-2.4	rev discord.
Spot 298	683.7	730.036	27109.8	3.46749	10.829	2.55151	1.43512	4.13326	0.113231	3.23968	0.783807	691.483	21.2423	903.686	24.7387	1465.77	48.7628	644.2	23.9		41	discord.
Spot 239	189.557	210.523	118763	2.12467	13.4234	0.815605	1.18654	1.31683	0.115402	1.03338	0.784745	704.042	6.89221	794.355	7.25594	1056.98	16.4531	724.75	7.35		16	discord.
Spot 87	113.749	129.691	760682	1.6768	13.3869	0.87202	1.78743	1.19274	0.17289	0.813762	0.682263	1028.02	7.73266	1040.89	7.76621	1068.04	17.5284	1034.23	7.18		1.8	concordant
Spot 179	1275.29	1311.71	5.69094e+06	8.22886	13.4999	0.662915	1.82042	1.35723	0.177788	1.18432	0.872602	1054.88	11.5245	1052.84	8.89512	1048.62	13.3834	1052.2	8.7		-0.33	concordant
Spot 295	122.472	128.363	1.31022e+06	4.88513	12.6047	0.673365	2.20291	1.07882	0.201214	0.842867	0.781289	1181.84	9.10154	1181.97	7.53421	1182.23	13.309	1181.95	7.51		0.017	concordant
Spot 51	361.941	393.248	555332	2.71682	10.8583	0.67698	2.34874	1.34707	0.184386	1.1646	0.864543	1090.89	11.6877	1227.18	9.5937	1475.31	12.8427	1243.8	11.2		19	discord.
Spot 41	101.396	112.805	83565.3	2.08851	11.5675	0.965935	2.58421	1.417	0.216907	1.03662	0.731565	1265.51	11.9112	1296.18	10.374	1347.3	18.6508	1287.9	10.4		3.6	concordant
Spot 33	875.07	914.373	717564	5.23214	11.5766	0.574536	2.76883	1.34206	0.232275	1.21286	0.90373	1346.41	14.7375	1347.17	10.0116	1348.37	11.09	1347.67	8.87		0.11	concordant
Spot 311	759.829	822.49	1.77407e+06	2.84964	9.74647	0.693697	2.5016	1.57549	0.176774	1.41455	0.897847	1049.33	13.6981	1272.5	11.4292	1672.31	12.8235	1356.4	15.5		33	discord.
Spot 166	406.459	423.558	164968	5.58612	11.4168	0.581561	2.80288	1.23604	0.231761	1.09067	0.882393	1343.72	13.229	1356.31	9.25053	1376.18	11.1819	1362.68	8.63		1.7	concordant
Spot 83	628.279	758.444	375292	1.1343	11.4807	0.717947	2.83083	1.38076	0.234829	1.17942	0.854181	1359.76	14.4588	1363.74	10.3606	1369.98	13.8174	1365.1	10		0.5	concordant
Spot 285	268.295	294.088	150322	2.44447	11.2961	0.484211	2.82963	0.907236	0.231634	0.767041	0.845471	1343.06	9.29947	1363.42	6.80659	1395.47	9.29064	1369.15	6.71		2.5	concordant
Spot 79	708.783	732.108	5.31948e+06	7.14111	11.5349	0.707106	2.87031	1.54772	0.239093	1.37675	0.889534	1381.98	17.1253	1374.15	11.6554	1361.99	13.6233	1369.8	10.6		-1.1	concordant
Spot 152	1023.1	1039.01	1.13698e+06	15.1117	11.5576	0.674354	2.93596	1.55361	0.246015	1.39963	0.900886	1417.89	17.8144	1391.23	11.7677	1350.57	13.014	1374.3	10.4		-3.7	rev discord.		high U/Th
Spot 254	210.603	224.437	65634.5	3.5775	10.9916	0.85559	3.03526	1.25204	0.242194	0.914011	0.730018	1398.09	11.488	1416.53	9.56279	1444.34	16.3006	1413.08	9.58		2	concordant
Spot 77	467.162	510.175	189359	2.55238	10.6627	0.782672	2.82681	1.89921	0.217829	1.73041	0.911122	1270.39	19.9526	1362.68	14.246	1510.5	14.7778	1429.7	12.5		14	discord.
Spot 10	411.039	466.883	214922	1.72972	10.746	0.772039	3.10493	1.26679	0.241354	1.00431	0.792801	1393.73	12.5877	1433.91	9.72957	1494.03	14.6102	1435.25	9.99		4.5	discord.
Spot 150	321.359	422.622	228609	0.745773	10.9384	0.599582	3.17246	1.10639	0.251721	0.929771	0.840362	1447.34	12.0533	1450.48	8.54188	1455.06	11.4075	1451.42	8.31		0.37	concordant
Spot 266	519.619	655.042	1.41238e+06	0.901695	10.9138	0.619692	3.22576	1.31545	0.254837	1.16034	0.882086	1463.37	15.1907	1463.37	10.1964	1463.35	11.7748	1463.37	9.31		-0.00047	concordant
Spot 229	191.798	225.202	2.43658e+06	1.34932	10.8472	0.70444	3.24158	1.13211	0.254328	0.886246	0.782829	1460.76	11.5839	1467.16	8.78532	1476.43	13.3616	1467.46	8.81		0.7	concordant
Spot 268	108.43	125.429	186851	1.49898	10.6208	0.919342	3.34834	1.28852	0.257744	0.902819	0.700663	1478.29	11.9266	1492.4	10.0749	1512.5	17.3528	1489.07	9.97		1.5	concordant
Spot 54	1347.01	1731.98	357323	0.82227	9.7742	0.632744	3.04403	1.35224	0.215128	1.19507	0.883769	1256.08	13.6392	1418.74	10.3356	1672.1	11.6969	1496.6	10.6		22	discord.
Spot 302	919.528	988.275	247744	3.14325	10.6622	0.69864	3.35602	1.37396	0.259356	1.18308	0.86107	1486.55	15.7065	1494.2	10.7487	1505.05	13.201	1497.4	10.2		0.91	concordant
Spot 209	1715.79	1946.98	542470	1.74399	10.2504	0.629747	3.1689	1.51178	0.23497	1.37437	0.909108	1360.5	16.857	1449.61	11.6688	1582.81	11.7763	1513.76	9.99		12	discord.
Spot 301	1689.99	1878.6	1.46839e+06	2.10567	11.4718	0.940436	3.58028	1.55414	0.297552	1.23731	0.796138	1679.16	18.291	1545.17	12.3358	1366.4	18.1075	1516.7	11.7		-14	rev discord.
Spot 65	190.765	227.597	193610	1.21717	10.4413	0.71219	3.5518	1.14822	0.268291	0.900637	0.784378	1532.12	12.2816	1538.84	9.09769	1548.05	13.3812	1539.39	9.11		0.7	concordant
Spot 56	909.869	990.934	1.74654e+06	2.63763	9.83905	0.783152	3.4738	1.41688	0.2469	1.18077	0.83336	1422.47	15.0721	1521.29	11.1714	1661.59	14.4972	1543.2	11.6		11	discord.
Spot 80	422.06	439.455	1.51865e+06	5.70187	10.2402	0.710548	3.556	1.19632	0.262981	0.96245	0.804507	1505.08	12.9189	1539.77	9.48132	1587.73	13.279	1544.74	9.58		3.7	discord.
Spot 26	152.736	189.736	279056	0.970077	10.2128	0.764421	3.6395	1.2022	0.269188	0.927865	0.771807	1536.68	12.6862	1558.21	9.57612	1587.51	14.2865	1558.81	9.69		2.2	concordant
Spot 9	346.372	373.71	160533	2.9774	9.99384	1.23326	3.66583	1.90885	0.265173	1.45681	0.763188	1516.25	19.6835	1563.96	15.2292	1628.96	22.9302	1562.4	15.7		4.9	discord.
Spot 73	1206.54	1253.3	1.10268e+06	6.06321	10.4792	0.588998	3.85375	1.34038	0.291706	1.20404	0.898279	1650.05	17.5283	1604.05	10.8064	1544.14	11.0718	1575.12	9.27		-5.5	rev discord.
Spot 198	1081.07	1091.64	1.7133e+06	24.0413	10.3047	0.74381	3.76946	1.49111	0.280834	1.29234	0.8667	1595.56	18.2665	1586.27	11.9666	1573.91	13.9258	1581.9	11		-1.1	concordant		high U/Th
Spot 162	233.599	270.23	185952	1.49863	10.0624	0.741913	3.7802	1.02785	0.275581	0.71132	0.692045	1569.07	9.9066	1588.55	8.25352	1614.49	13.818	1584.14	8.21		2	concordant
Spot 2	323.605	334.209	697473	7.17201	10.2357	0.695089	3.76988	1.04977	0.279405	0.78668	0.749384	1588.37	11.075	1586.35	8.42469	1583.66	12.997	1586.39	8.41		-0.2	concordant
Spot 199	240.334	282.714	5.35092e+06	1.33265	10.1851	0.727971	3.88975	1.13647	0.286487	0.872707	0.767912	1623.95	12.5282	1611.56	9.17982	1595.38	13.5927	1610.76	9.11		-1.2	concordant
Spot 201	125.149	147.531	84609.9	1.31403	10.1126	0.751665	3.88638	1.10039	0.284889	0.802342	0.729142	1615.94	11.468	1610.86	8.88682	1604.21	14.0452	1611.23	8.84		-0.5	concordant
Spot 169	323.934	378.32	634131	1.39969	10.0242	0.712876	3.8775	1.3807	0.281813	1.18243	0.856398	1600.49	16.7583	1609.01	11.1455	1620.16	13.2665	1612.6	10.5		0.94	concordant
Spot 138	1066.65	1099.4	1.34163e+06	7.65369	9.77382	0.623928	3.80561	1.38636	0.269994	1.23803	0.893005	1540.77	16.9669	1593.93	11.1481	1664.94	11.5444	1626.64	9.71		6.5	discord.
Spot 82	248.461	305.432	811103	1.02487	10.1517	0.642072	4.09908	1.04687	0.300723	0.826847	0.789829	1694.89	12.3233	1654.12	8.54529	1602.7	11.9774	1647.03	8.33		-4	rev discord.
Spot 27	873.209	886.795	1.17355e+07	15.1041	9.87281	0.665526	4.13724	1.4304	0.295667	1.26614	0.885167	1669.79	18.6256	1661.69	11.6973	1651.46	12.3354	1657.1	10.3		-0.92	concordant		high U/Th
Spot 237	1106.13	1140.65	918083	7.52907	9.54303	0.725213	3.96726	1.46722	0.273803	1.27546	0.869305	1560.08	17.6735	1627.53	11.8992	1715.83	13.3325	1660.1	11		7.6	discord.
Spot 137	252.433	285.176	404253	1.81171	8.88028	0.67443	4.33561	0.971677	0.279535	0.699493	0.719882	1589.02	9.85113	1700.16	8.01728	1840.01	12.2117	1677.08	8.64		11	discord.
Spot 292	663.051	726.36	1.78721e+06	2.46124	9.74418	0.730508	4.23942	1.51211	0.299313	1.32394	0.875562	1687.9	19.6607	1681.69	12.4239	1673.93	13.5013	1678.4	11.1		-0.68	concordant
Spot 185	487.962	507.873	253242	5.75916	9.69526	0.6125	4.25399	1.44278	0.298126	1.30631	0.905407	1682.01	19.3396	1684.51	11.862	1687.61	11.3025	1686.2	9.76		0.29	concordant
Spot 11	542.058	592.05	458136	2.54808	9.68876	0.725398	4.28724	1.46446	0.30035	1.27217	0.8687	1693.05	18.9423	1690.91	12.058	1688.25	13.3842	1689.9	10.9		-0.23	concordant
Spot 40	228.721	240.364	125906	4.61678	9.57388	0.785685	4.30024	1.02373	0.298467	0.6558	0.640598	1683.7	9.71753	1693.41	8.4338	1705.42	14.471	1690.38	8.14		0.93	concordant
Spot 75	356.058	389.001	389452	2.53992	9.72918	0.593406	4.32146	1.09957	0.303763	0.92569	0.841868	1709.94	13.9034	1697.46	9.06698	1682.08	10.9575	1692.77	8.55		-1.3	concordant
Spot 50	356.668	368.89	183769	6.85778	9.60239	0.634491	4.25226	1.37589	0.295436	1.22086	0.887321	1668.64	17.9487	1684.17	11.3111	1703.56	11.6826	1693.25	9.83		1.8	concordant
Spot 284	347.777	368.338	701877	3.97479	9.66645	0.837769	4.32289	1.33315	0.302519	1.03703	0.777878	1703.79	15.5267	1697.74	10.9939	1690.26	15.4519	1697	10.9		-0.58	concordant
Spot 300	509.059	527.519	191350	6.48041	9.48464	0.584383	4.44075	1.48872	0.305308	1.36923	0.919733	1717.58	20.6453	1719.97	12.3385	1722.88	10.7354	1721.76	9.52		0.28	concordant
Spot 218	116.643	137.729	130894	1.29996	9.28769	0.88416	4.54216	1.24429	0.305539	0.87549	0.703606	1718.72	13.2083	1738.73	10.355	1762.87	16.1619	1736.1	10.4		1.9	concordant
Spot 117	193.053	202.734	281412	4.68637	9.32948	0.759949	4.58445	1.20614	0.310062	0.93661	0.776535	1741.01	14.2901	1746.44	10.0542	1752.94	13.9066	1747.1	10		0.51	concordant
Spot 126	411.65	446.177	399063	2.80184	9.25912	0.70978	4.69644	1.08349	0.315395	0.818635	0.755552	1767.2	12.6534	1766.61	9.07053	1765.89	12.9691	1766.57	9.05		-0.055	concordant
Spot 85	282.177	314.25	158664	2.06753	9.25868	0.840603	4.73602	1.20454	0.316951	0.862678	0.716187	1774.82	13.3841	1773.64	10.0988	1772.23	15.3468	1773.7	10.1		-0.11	concordant
Spot 173	995.491	1116.42	828803	1.93447	9.27485	0.696716	4.78831	1.4651	0.322005	1.28883	0.879692	1799.51	20.237	1782.85	12.3069	1763.39	12.7344	1773.7	10.7		-1.7	rev discord.
Spot 76	317.271	354.676	323873	1.99329	9.25626	0.638711	4.85443	1.07075	0.324543	0.85938	0.802598	1811.88	13.5741	1794.38	9.01534	1774.09	11.6571	1790.11	8.75		-1.6	concordant
Spot 181	431.82	471.886	1.12976e+06	2.53274	9.01164	0.725791	4.99026	1.18616	0.325358	0.938189	0.790948	1815.84	14.847	1817.67	10.0338	1819.75	13.1722	1818.04	9.87		0.17	concordant
Spot 7	117.807	126.99	833615	3.01477	8.7437	0.607935	4.91884	1.13101	0.311342	0.953723	0.843253	1747.31	14.597	1805.49	9.54406	1873.33	10.9634	1828.19	9.02		5.8	discord.
Spot 294	519.948	568.071	395874	2.53907	8.94963	0.734847	5.09576	1.52507	0.330513	1.33634	0.876253	1840.87	21.3997	1835.4	12.9456	1829.19	13.3214	1832.5	11.3		-0.56	concordant
Spot 140	292.757	332.381	381267	1.73623	8.85948	0.745456	5.08824	1.05715	0.32702	0.749563	0.709043	1823.92	11.9076	1834.15	8.97123	1845.76	13.4865	1833.44	9		0.91	concordant
Spot 46	88.481	104.603	159352	1.28971	8.86656	0.868821	5.09958	1.28455	0.327197	0.946126	0.736542	1824.78	15.0363	1836.04	10.9052	1848.8	15.7135	1836.2	11		1	concordant
Spot 200	168.67	201.777	3.10934e+06	1.19727	8.28741	0.821812	5.00622	2.0557	0.30026	1.88428	0.916614	1692.6	28.0501	1820.37	17.3997	1969.88	14.6498	1917	12.7		15	discord.
Spot 246	160.448	171.708	964492	3.34869	8.37735	0.771505	5.87122	1.07742	0.356492	0.752074	0.698032	1965.52	12.7413	1956.99	9.34807	1947.96	13.7902	1957.41	9.3		-0.71	concordant
Spot 122	537.723	558.092	1.85789e+06	6.20389	6.95494	0.693001	6.58305	1.58866	0.331878	1.42954	0.899841	1847.48	22.963	2057.08	14.0046	2274.2	11.9395	2196.8	10.2		21	discord.
Spot 19	303.053	340.717	1.23086e+07	1.89085	7.08497	0.720877	8.05113	1.27552	0.412753	1.05227	0.824977	2227.5	19.8185	2236.78	11.5209	2245.27	12.4609	2240.3	10.6		0.74	concordant
Spot 6	291.569	315.69	2.08652e+06	2.84055	5.7648	0.625664	9.24459	1.10853	0.38575	0.915089	0.825496	2103.09	16.4211	2362.54	10.1575	2594.69	10.4328	2461.26	9.36		20	discord.
Spot 171	69.4936	80.8342	2.39396e+06	1.44004	5.58023	0.570119	12.5318	1.07107	0.506926	0.90673	0.846563	2643.49	19.663	2645.11	10.0721	2646.34	9.45929	2645.82	8.52		0.11	concordant
Spot 123	197.381	224.326	522398	1.72148	5.53997	0.588396	12.758	0.971643	0.512369	0.773227	0.795793	2666.73	16.8869	2661.95	9.14905	2658.3	9.75478	2660.43	8.44		-0.32	concordant
Spot 89	441.812	489.115	3.10605e+06	2.19487	4.88715	0.589449	16.0983	1.20799	0.568327	1.05442	0.872868	2900.95	24.6318	2882.65	11.5489	2869.89	9.58424	2874.02	8.97		-1.2	concordant

## Sheet: 18COA-4
Aliquot Name	18COA-4
Stratigraphic Formation Name	top of Lower Mbr, Coaledo Fm
Stratigraphic Age	Eocene
Rock Type	sandstone
Mineral	Zircon
Method	U-Pb
Latitude	43.3359
Longitude	-124.373
Internal Uncertainty Level	one sigma
External Uncertainty 206/238 (% two sigma)	0.989728
External Uncertainty 206/207 (% two sigma)	0.817154
Analysis Purpose	DZ
Laboratory Name	Arizona LaserChron Center
Analyst Name	M. Darin
Aliquot Reference
Aliquot Instrumental Method	LA-ICPMS
Aliquot Instrumental Reference	Gehrels, G.E., Valencia, V., Ruiz, J., 2008, Enhanced precision, accuracy, efficiency, and spatial resolution of U-Pb ages by laser ablation-multicollector-inductively coupled plasma-mass spectrometry: Geochemistry, Geophysics, Geosystems, v. 9, Q03017, doi:10.1029/2007GC001805.
	Gehrels, G. and Pecha, M., 2014, Detrital zircon U-Pb geochronology and Hf isotope geochemistry of Paleozoic and Triassic passive margin strata of western North America: Geosphere, v. 10 (1), p. 49-65.
								Isotope ratios						Apparent ages (Ma)				Best Age
Analysis	U	eU	206Pb	U/Th	206Pb*	±	207Pb*	±	206Pb*	±	error	206Pb*	±	207Pb*	±	206Pb*	±	Concordia Age	±1σ	within 10% of YSCG (*)	Discordance (dc)	Concordance	Age Class	Notes
	(ppm)	(ppm)	204Pb		207Pb*	(%)	235U	(%)	238U	(%)	corr.	238U	(Ma)	235U	(Ma)	207Pb*	(Ma)	(Ma)	(Ma)		(%)
Spot 102	628.282	688.745	16772.1	2.44192	20.4594	1.47784	0.041897	2.02847	0.00636746	1.38883	0.684667	40.9172	0.566469	41.6745	0.828242	85.5166	35.0531	40.92	0.57	YSCG	1.9	concordant	Y	YSCG, YC2σ
Spot 138	967.967	1059.45	84116	2.48644	20.0194	1.41688	0.044125	1.83266	0.00646367	1.16079	0.633393	41.5334	0.480567	43.8435	0.7864	172.093	33.0984	41.48	0.48	*	5.5	discord.	P	high eU
Spot 63	364.217	410.469	30917.6	1.85057	19.7975	2.06847	0.0448084	2.47024	0.0065315	1.35015	0.546567	41.9678	0.564788	44.5078	1.0757	183.588	48.1673	41.92	0.56	*	6	discord.	D	does not overlap concordia within 2σ
Spot 163	428.14	476.941	56137.4	2.06168	19.773	2.17824	0.0452933	2.45477	0.00656229	1.13184	0.461079	42.165	0.475685	44.9789	1.08003	197.702	50.6018	42.13	0.48	*	6.6	discord.	D	does not overlap concordia within 2σ
Spot 245	486.429	554.896	47774.6	1.66957	19.8677	2.22566	0.0452207	2.5486	0.00659413	1.23968	0.486416	42.369	0.523518	44.9084	1.11959	182.691	51.8805	42.34	0.52	*	5.9	discord.	D	does not overlap concordia within 2σ
Spot 190	581.006	670.273	19661.9	1.52952	19.795	1.55794	0.0450699	2.05983	0.00661473	1.28903	0.625794	42.5008	0.546046	44.7619	0.90199	167.624	37.5366	42.45	0.55	*	5.3	discord.	D	does not overlap concordia within 2σ
Spot 208	367.576	413.602	10809.1	1.87677	19.8098	2.37462	0.0444393	2.69079	0.00660906	1.20695	0.448547	42.4645	0.51084	44.1491	1.1625	136.625	56.532	42.46	0.51	*	4	discord.	S	YC2σ
Spot 70	612.503	676.65	23952.7	2.24386	19.6844	1.86362	0.0456352	2.20207	0.0066373	1.08568	0.493026	42.6454	0.461463	45.311	0.975844	188.743	44.6081	42.61	0.46	*	6.2	discord.	D	does not overlap concordia within 2σ
Spot 95	473.858	543.39	16404.5	1.60151	19.6244	1.55518	0.0456389	2.13044	0.00665045	1.45382	0.682403	42.7297	0.619159	45.3146	0.944177	184.322	36.2469	42.64	0.62	*	6	discord.	D	does not overlap concordia within 2σ
Spot 252	538.624	613.094	38899.8	1.69969	20.0709	1.6067	0.0450215	1.99628	0.0066429	1.18199	0.592098	42.6813	0.502823	44.7149	0.873265	155.211	37.6835	42.65	0.5	*	4.8	discord.	D	does not overlap concordia within 2σ
Spot 10	356.155	404.939	11890.1	1.71565	20.3462	2.20017	0.0435039	2.48878	0.00664245	1.13911	0.457696	42.6784	0.484547	43.2393	1.05354	74.4893	52.6095	42.68	0.48	*	1.3	concordant	S	YC2σ
Spot 28	499.408	555.251	10789.6	2.10166	20.4025	1.77604	0.0434159	2.38604	0.00665089	1.38408	0.580073	42.7325	0.589495	43.1537	1.00809	66.6362	46.2611	42.73	0.59	*	1	concordant	S	YC2σ
Spot 227	503.836	569.922	117111	1.79162	21.2077	1.74948	0.0429115	2.1928	0.00666062	1.32196	0.602864	42.7948	0.563855	42.6627	0.916125	35.2176	NA	42.79	0.56	*	-0.32	concordant	S	YC2σ
Spot 176	337.399	372.371	13016.9	2.26716	18.9192	2.29622	0.0472841	2.6569	0.00667055	1.12878	0.424851	42.8584	0.482174	46.9109	1.21802	259.257	55.2575	42.8	0.48	*	9.2	discord.	D	does not overlap concordia within 2σ
Spot 5	562.969	650.794	31922.6	1.50637	20.1454	1.45865	0.0449629	1.95927	0.00666925	1.3078	0.667495	42.85	0.558535	44.658	0.856007	142.856	34.2376	42.82	0.56	*	4.2	discord.	D	does not overlap concordia within 2σ
Spot 314	414.389	477.617	5819.79	1.54016	20.3474	1.59083	0.0425598	1.82716	0.00666839	0.894472	0.489541	42.8445	0.381961	42.3202	0.757367	12.6744	NA	42.84	0.38	*	-1.3	concordant	S
Spot 255	518.403	601.563	7838.55	1.46494	20.0553	1.46199	0.0438323	2.02191	0.00667077	1.19702	0.592025	42.8597	0.511338	43.5587	0.862095	82.1983	38.6827	42.86	0.51	*	1.7	concordant	S	YC2σ
Spot 105	499.889	576.699	31180.2	1.5294	17.7314	2.4829	0.0514791	2.72158	0.00670878	1.10267	0.40516	43.1031	0.473702	50.9701	1.35295	438.519	55.3847	42.91	0.47	*	17	discord.	D	does not overlap concordia within 2σ
Spot 168	408.228	465.582	6807.82	1.67266	19.3974	1.91202	0.045224	2.18798	0.00668085	1.04645	0.478274	42.9243	0.44769	44.9116	0.961241	152.372	45.0068	42.91	0.45	*	4.6	discord.	S	YC2σ
Spot 165	287.343	322.958	4446.34	1.89598	19.774	2.56683	0.0433176	2.93929	0.00668899	1.28136	0.435943	42.9764	0.548852	43.0579	1.23914	47.6233	NA	42.98	0.55	*	0.19	concordant	S	YC2σ
Spot 246	770.128	824.636	16385.4	3.32029	20.1013	1.26283	0.0448334	1.94157	0.00669514	1.45007	0.746852	43.0158	0.621681	44.5321	0.845937	127.002	30.3705	42.98	0.62	*	3.5	concordant	D	does not overlap concordia within 2σ
Spot 153	423.783	487.741	20778.1	1.55711	19.8192	2.30704	0.045736	2.59228	0.00670238	1.15338	0.44493	43.0622	0.495016	45.4089	1.15119	171.142	54.1978	43.04	0.5	*	5.4	discord.	S
Spot 51	918.372	981.566	17708.9	3.41511	20.6035	1.32403	0.0438297	1.80352	0.0067128	1.22299	0.678114	43.1289	0.525703	43.5562	0.768936	67.1294	31.5726	43.13	0.53	*	1	concordant	S
Spot 193	552.461	656.957	10579.5	1.24243	20.3055	1.71001	0.0440344	2.16735	0.00672159	1.30543	0.602317	43.1851	0.561869	43.7553	0.92819	75.1011	41.1367	43.19	0.56	*	1.3	concordant	S
Spot 298	342.212	378.282	4924.56	2.22953	20.5665	2.05673	0.0420088	2.3712	0.00672679	1.06545	0.44933	43.2185	0.458931	41.7834	0.970659	NA	NA	43.2	0.46	*	-3.4	rev discord.	S
Spot 197	470.763	552.012	54091.1	1.3616	20.445	2.04255	0.0448661	2.57218	0.00674242	1.5624	0.607421	43.3186	0.674539	44.5639	1.12148	112.121	48.2345	43.31	0.67	*	2.9	concordant	S	YC2σ
Spot 36	541.919	638.514	7821.32	1.3184	17.1867	1.76729	0.0526981	2.10645	0.00682728	1.13649	0.539527	43.8619	0.496794	52.1465	1.07071	451.62	39.4067	43.44	0.5	*	18	discord.	D	does not overlap concordia within 2σ
Spot 251	448.423	519.971	13603	1.47284	19.7095	1.57113	0.0460425	1.79065	0.00676488	0.838535	0.468285	43.4624	0.363221	45.7064	0.800294	165.064	36.9704	43.44	0.36	*	5.1	discord.	D	does not overlap concordia within 2σ
Spot 122	350.687	386.03	6093.02	2.33175	19.5019	1.92016	0.0456142	2.32261	0.00680291	0.89116	0.38369	43.7059	0.388172	45.2906	1.02881	130.022	50.4587	43.7	0.39	*	3.6	concordant	S
Spot 209	527.708	625.161	92576.6	1.27253	20.5671	1.42117	0.0451394	1.91244	0.00680585	1.27973	0.66916	43.7247	0.557665	44.8294	0.838687	104.311	33.5932	43.72	0.56	*	2.6	concordant	S
Spot 26	415.648	465.537	14214.9	1.95789	19.5922	1.85628	0.0466861	2.20441	0.0068143	1.09038	0.494638	43.7788	0.47574	46.331	0.998375	180.474	44.6755	43.75	0.48	*	5.8	discord.	D	does not overlap concordia within 2σ
Spot 58	316.412	356.361	6492.07	1.86133	20.2832	1.69606	0.0438308	2.08327	0.0068139	1.07521	0.516116	43.7763	0.469092	43.5573	0.888229	31.5373	NA	43.77	0.47	*	-0.51	concordant	S
Spot 124	414.447	462.538	6083.51	2.02522	20.0503	1.45758	0.0443706	2.39966	0.00681419	1.02967	0.429091	43.7781	0.449244	44.0823	1.03519	60.6637	51.6525	43.78	0.45	*	0.71	concordant	S
Spot 221	1086.8	1191.23	87375	2.44578	18.3444	1.46654	0.0513635	2.01016	0.00690442	1.37462	0.683837	44.3558	0.607631	50.8584	0.997154	369.121	33.0276	43.78	0.61	*	14	discord.	P	high eU
Spot 237	607.573	691.108	8059.05	1.70923	14.5929	3.90559	0.062882	4.16952	0.00687913	1.34273	0.322035	44.1939	0.591376	61.9222	2.50471	815.777	82.5116	43.78	0.59	*	35	discord.	D	does not overlap concordia within 2σ
Spot 240	339.823	380.79	49665.3	1.94934	20.3687	1.64243	0.0455517	1.87193	0.00681777	0.897959	0.479696	43.801	0.391982	45.2299	0.828094	121.644	38.6994	43.79	0.39	*	3.3	concordant	S
Spot 129	721.401	848.827	127822	1.33042	20.2902	1.42657	0.0461313	1.84861	0.00683756	1.17568	0.635979	43.9277	0.514692	45.7927	0.827723	144.555	33.4465	43.9	0.51	*	4.3	discord.	D	does not overlap concordia within 2σ
Spot 308	220.909	245.175	10062.1	2.13938	19.4485	2.3395	0.0467896	2.63084	0.0068478	1.16911	0.444386	43.9933	0.512577	46.4314	1.19403	174.203	54.984	43.97	0.51	*	5.5	discord.	S
Spot 20	462.757	525.847	41464.2	1.72368	20.1971	1.99215	0.04633	2.36498	0.00688799	1.27396	0.538678	44.2506	0.561805	45.9855	1.06329	137.421	46.8112	44.24	0.56	*	3.9	discord.	S
Spot 174	453.824	519.391	13064.1	1.62657	20.9203	1.67815	0.0444608	2.25089	0.00695222	1.48756	0.660874	44.6618	0.662073	44.1699	0.972903	17.5151	NA	44.65	0.66	*	-1.1	concordant	S
Spot 264	1012.01	1092.34	94515.8	2.9607	19.9083	1.0108	0.0478496	1.63403	0.006984	1.28382	0.785677	44.8653	0.573991	47.4591	0.757653	180.515	23.5689	44.71	0.57	*	5.8	discord.	P	high eU
Spot 268	788.081	869.925	92560.2	2.26282	19.617	1.66708	0.0492366	2.56732	0.00708442	1.95239	0.760477	45.5081	0.885366	48.8022	1.22328	213.783	38.6421	45.29	0.89		7.2	discord.	D	does not overlap concordia within 2σ
Spot 17	350.03	446.209	18920.3	0.855252	20.3005	2.19452	0.046894	2.41372	0.00707599	0.996812	0.412978	45.4541	0.451499	46.5326	1.09782	102.469	52.0045	45.45	0.45		2.4	concordant	S
Spot 292	348.891	390.983	62394.4	1.94789	18.9632	1.79218	0.0510004	2.08499	0.00709664	1.0562	0.506575	45.5863	0.479785	50.5077	1.02732	290.739	41.0835	45.46	0.48		11	discord.	D	does not overlap concordia within 2σ
Spot 158	989.939	1070	31366.9	2.9058	20.8214	1.34488	0.0465784	1.84491	0.00714062	1.24585	0.67529	45.8678	0.569417	46.2265	0.833716	64.8742	32.3783	45.87	0.57		0.8	concordant	P	high eU
Spot 43	194.055	221.901	12502.8	1.63763	15.1652	3.12648	0.0635984	3.31854	0.00717991	0.886381	0.267099	46.1193	0.407334	62.6064	2.01487	749.622	67.5679	45.88	0.41		31	discord.	D	does not overlap concordia within 2σ
Spot 234	294.526	334.487	114501	1.732	17.5018	2.47231	0.0563378	2.75237	0.00721495	1.20946	0.439423	46.3436	0.558495	55.6511	1.49051	477.227	54.6864	46.05	0.56		19	discord.	D	does not overlap concordia within 2σ
Spot 210	295.453	339.079	6290.54	1.59152	18.7982	2.26481	0.0499746	2.50298	0.00717982	1.00973	0.403412	46.1187	0.464013	49.5161	1.20964	217.258	53.0253	46.09	0.46		7.3	discord.	D	does not overlap concordia within 2σ
Spot 243	697.696	916.84	190584	0.748178	19.9849	1.59746	0.0493628	1.96523	0.00721107	1.14466	0.582457	46.3187	0.528293	48.9244	0.938682	178.512	37.2491	46.27	0.53		5.6	discord.	D	does not overlap concordia within 2σ
Spot 297	859.875	1049.63	45426.9	1.06488	20.4478	1.38877	0.0479985	1.84425	0.00721695	1.21042	0.656323	46.3564	0.559095	47.6033	0.857662	110.844	32.8727	46.35	0.56		2.7	concordant	S
Spot 31	312.348	354.993	13515.6	1.72121	19.8183	1.94038	0.0502068	2.20185	0.00742199	1.02887	0.467275	47.6686	0.488639	49.7407	1.06882	150.755	45.6383	47.66	0.49		4.4	discord.
Spot 156	294.6	371.652	6597.09	0.898493	19.6741	2.36519	0.0495886	3.46274	0.00744013	1.04369	0.301406	47.7846	0.496879	49.1428	1.66117	115.896	77.9122	47.78	0.5		2.9	concordant
Spot 33	525.243	566.568	30744.2	2.98682	20.4433	1.44163	0.0495302	1.8865	0.00745883	1.11997	0.593674	47.9043	0.534524	49.0863	0.903987	107.221	35.8622	47.9	0.53		2.5	concordant
Spot 181	699.656	826.507	14186.3	1.29616	20.5878	1.3941	0.0488111	1.98178	0.00748916	1.40708	0.710005	48.0983	0.674261	48.3904	0.9365	62.9048	33.2401	48.1	0.67		0.62	concordant
Spot 136	266.519	299.251	20450.8	1.91351	17.2246	3.10473	0.0598771	3.26039	0.00761306	0.991524	0.304112	48.891	0.482933	59.0475	1.87028	493.201	68.4912	48.75	0.48		19	discord.
Spot 242	227.818	278.644	12969.1	1.05333	19.3462	3.21379	0.0532623	3.48731	0.00769471	1.11016	0.318344	49.4134	0.546473	52.6905	1.79062	204.405	76.7272	49.4	0.55		6.6	discord.
Spot 21	435.13	469.251	8844.71	2.99684	20.104	1.50819	0.0507206	2.05697	0.00771075	1.301	0.632487	49.516	0.641738	50.2373	1.00822	84.7628	37.7795	49.52	0.64		1.5	concordant
Spot 23	200.56	221.829	5643.39	2.21607	19.4052	2.09847	0.0521581	2.49576	0.00779193	1.10739	0.443708	50.0354	0.551941	51.6255	1.25624	126.102	52.6514	50.03	0.55		3.2	concordant
Spot 69	82.394	99.0263	169540	1.16415	18.0505	4.19847	0.0608324	4.41795	0.00802753	1.37517	0.31127	51.5422	0.705969	59.9623	2.5724	410.599	93.9484	51.44	0.71		16	discord.
Spot 67	135.43	174.439	7022.6	0.815877	19.8632	3.08657	0.0540028	3.55801	0.00816308	1.31226	0.36882	52.409	0.684957	53.4041	1.85102	98.2778	78.2528	52.41	0.69		1.9	concordant
Spot 196	237.468	258.418	19655.3	2.66373	19.2938	2.79791	0.0573225	2.93773	0.00820233	0.884727	0.30116	52.6599	0.463999	56.5973	1.61719	226.573	64.7664	52.64	0.46		7.4	discord.
Spot 86	1011.86	1375.64	64019.4	0.653667	20.2316	1.33695	0.055341	1.9146	0.00821453	1.36914	0.715102	52.738	0.71911	54.6925	1.01944	141.166	31.401	52.71	0.72		3.7	discord.
Spot 266	1040.5	1163.08	39240.2	1.9948	13.4365	1.69851	0.0952774	2.48296	0.00940756	1.81059	0.729206	60.3615	1.0878	92.4077	2.19314	1026.47	34.3697	52.95	1.03		46	discord.
Spot 186	910.892	1005.86	97272.1	2.25412	20.1242	1.27413	0.0567413	1.85587	0.00836204	1.34905	0.726912	53.6811	0.721178	56.0389	1.01183	158.024	29.8045	53.62	0.72		4.4	discord.
Spot 29	488.143	570.589	42423	1.39139	20.3213	1.90133	0.0564627	2.36586	0.00843329	1.40541	0.594036	54.1365	0.757652	55.7712	1.28389	126.582	44.8022	54.13	0.76		3.1	concordant
Spot 285	786.581	903.787	22611.7	1.5771	20.0581	1.72007	0.0572744	2.1777	0.00850802	1.30235	0.598037	54.6142	0.708261	56.5511	1.19785	139.376	40.9777	54.6	0.71		3.6	concordant
Spot 32	1907.2	2449.38	165371	0.826648	20.6932	0.895519	0.0565493	1.31609	0.00855587	0.964419	0.732791	54.9201	0.52741	55.8545	0.715243	96.0974	21.2047	54.93	0.53		1.7	concordant
Spot 118	1457.34	1728.88	22239.9	1.26123	17.859	1.73938	0.0662998	2.03683	0.00872587	1.05942	0.520133	56.0066	0.590776	65.182	1.28593	416.523	38.8706	55.63	0.59		16	discord.
Spot 112	768.213	833.159	212140	2.77971	20.1985	1.31034	0.0595844	1.63192	0.00877437	0.972711	0.596053	56.3165	0.545411	58.7671	0.931806	159.792	30.6781	56.29	0.55		4.4	discord.
Spot 57	876.813	924.56	27931.8	4.31552	20.0972	1.49115	0.0598554	1.91423	0.00888826	1.19263	0.623036	57.0443	0.677326	59.0268	1.09769	140.233	35.1568	57.03	0.68		3.5	concordant
Spot 150	1450.1	1589.08	108151	2.45183	20.7203	0.922899	0.0600385	1.3495	0.00909485	0.984099	0.729233	58.3642	0.571769	59.2021	0.776087	93.2054	21.894	58.37	0.57		1.5	concordant
Spot 220	504.567	556.708	31366.8	2.27411	19.7619	1.68257	0.0635283	2.21217	0.00925708	1.43253	0.647569	59.4004	0.847023	62.5394	1.34174	184.373	39.2725	59.34	0.85		5.3	discord.
Spot 203	573.793	859.118	647979	0.47259	9.64422	0.598792	1.8887	4.08009	0.133249	4.03591	0.989172	806.374	30.5916	1077.13	27.0934	1675.29	11.0664	61.13	9.48		280	discord.
Spot 284	1219.74	1344.99	84837.7	2.28855	19.9467	0.80818	0.0834146	1.2172	0.0121925	0.905167	0.74365	78.1226	0.702873	81.3501	0.951563	177.161	18.9896	78.08	0.7		4.2	discord.
Spot 278	566.202	633.877	42445.8	1.96611	18.1571	2.1475	0.101339	2.78704	0.0135341	1.77617	0.637296	86.6612	1.52895	98.0115	2.60393	383.731	48.2445	86.03	1.53		13	discord.
Spot 3	1045.04	1153.02	151336	2.27425	20.2858	1.018	0.0909079	1.43069	0.0134706	1.00442	0.70205	86.2574	0.860615	88.3488	1.21057	145.203	23.8779	86.28	0.86		2.5	concordant
Spot 73	318.826	336.132	21793.5	4.32939	19.7113	1.83153	0.0930718	2.15616	0.0135569	1.1129	0.516147	86.8064	0.959588	90.3609	1.86415	185.254	43.014	86.8	0.96		4.2	discord.
Spot 177	921.462	949.325	156185	7.77171	17.7334	1.8258	0.108526	2.2585	0.0140676	1.32905	0.588466	90.0534	1.18854	104.616	2.24513	450.44	40.5802	89.27	1.19		16	discord.
Spot 15	613.792	680.458	26155	2.16363	20.2316	1.03806	0.0935201	1.63294	0.0140007	1.25698	0.769767	89.628	1.11881	90.7772	1.41801	121.099	24.5751	89.67	1.12		1.3	concordant
Spot 301	493.086	605.66	86521.4	1.02933	19.7414	1.25783	0.0972526	1.8827	0.0140711	1.40066	0.743962	90.0758	1.25288	94.2371	1.69436	200.889	29.2119	90.02	1.26		4.7	discord.
Spot 134	849.72	938.884	124668	2.23951	20.5561	1.0253	0.0941999	1.73208	0.0141523	1.39482	0.805283	90.5923	1.25476	91.4083	1.51409	112.746	24.2353	90.64	1.25		0.94	concordant
Spot 22	880.246	1014.86	568160	1.53672	20.7928	1.23044	0.0932866	1.60387	0.0141833	1.0288	0.641447	90.7893	0.927494	90.5604	1.38959	84.5103	29.1903	90.78	0.93		-0.26	concordant
Spot 254	745.596	817.343	60160.9	2.44213	20.2837	1.25661	0.0953525	1.69709	0.0141958	1.13979	0.671613	90.8683	1.02844	92.4773	1.50008	134.171	29.5357	90.89	1.03		1.8	concordant
Spot 219	262.401	284.295	106709	2.81649	19.8636	1.64944	0.0982916	1.9006	0.014302	0.942387	0.495836	91.5438	0.856601	95.1981	1.72711	187.725	38.4199	91.54	0.86		4.1	discord.
Spot 146	1154.6	1292.69	193141	1.96493	19.1668	1.14435	0.102717	1.52773	0.0143612	1.01189	0.662349	91.9199	0.92353	99.2817	1.44497	279.893	26.1931	91.69	0.92		8.1	discord.
Spot 64	1197.51	1382.75	349410	1.51914	20.6263	0.887507	0.095326	1.55744	0.0143528	1.2798	0.821735	91.8667	1.16738	92.4527	1.37629	107.624	20.9653	91.91	1.17		0.66	concordant
Spot 155	974.282	1063.83	45346.2	2.5568	20.2811	0.941841	0.0970556	1.72328	0.0144461	1.44142	0.836438	92.4594	1.32321	94.0548	1.54802	134.707	22.1867	92.54	1.32		1.8	concordant
Spot 247	1019.95	1159.85	474637	1.71336	20.3881	1.01101	0.0971105	1.55601	0.0144519	1.1828	0.76015	92.4959	1.08623	94.1056	1.39848	135.125	23.7738	92.54	1.09		1.8	concordant
Spot 53	1267.62	1407.44	55666	2.13047	20.4043	0.831343	0.0964536	1.53121	0.0144533	1.27414	0.832115	92.5049	1.17023	93.4975	1.36771	118.874	20.0213	92.57	1.17		1.1	concordant
Spot 161	449.642	532.383	51327.8	1.27705	18.6802	1.90136	0.106074	2.32331	0.0145143	1.3337	0.574053	92.893	1.23003	102.368	2.26236	328.984	43.1492	92.62	1.23		10	discord.
Spot 312	946.005	1039.5	44895.7	2.37775	20.2453	0.914005	0.0973274	1.57593	0.0144848	1.25831	0.798454	92.7052	1.15817	94.3064	1.41928	135.002	22.3126	92.76	1.16		1.8	concordant
Spot 275	1148.16	1264.71	121600	2.31514	20.6674	0.984429	0.0961467	1.66295	0.0145664	1.34002	0.805806	93.2235	1.24022	93.2132	1.48107	92.9515	23.3151	93.22	1.24		-0.012	concordant
Spot 170	1203.44	1292.94	161060	3.15992	18.3572	1.38666	0.109982	1.94405	0.0147517	1.36233	0.700768	94.401	1.27668	105.949	1.95588	374.05	31.2163	93.58	1.28		12	discord.
Spot 113	1060.97	1193.99	5.44774e+06	1.87425	20.3721	0.845059	0.0985453	1.26222	0.0146168	0.937592	0.742811	93.5438	0.870727	95.4327	1.1497	142.878	19.8322	93.59	0.87		2.1	concordant
Spot 263	1175.7	1257.2	198467	3.39004	20.088	0.725879	0.0995543	1.30356	0.0146382	1.08246	0.830391	93.6797	1.00671	96.3649	1.19841	163.313	16.9581	93.73	1.01		3	concordant
Spot 183	863.966	1014.07	52699.7	1.35265	19.9628	1.00945	0.101071	1.53726	0.014797	1.15928	0.75412	94.6886	1.08968	97.7647	1.43281	173.432	23.5559	94.71	1.09		3.4	concordant
Spot 200	691.146	771.031	35219	2.03317	19.7537	1.09564	0.101895	1.73139	0.0148438	1.28795	0.743883	94.9859	1.2144	98.5241	1.62569	184.993	26.9351	94.99	1.22		3.8	discord.
Spot 119	1446.84	1651.95	502965	1.6577	20.4584	0.920154	0.0995589	1.50514	0.01485	1.19111	0.791364	95.0252	1.12355	96.3691	1.38378	129.753	21.6576	95.08	1.12		1.5	concordant
Spot 65	567.284	637.414	15273.6	1.90092	19.9899	1.39228	0.100057	1.77543	0.0148726	1.10133	0.620321	95.1692	1.04043	96.8285	1.6397	137.904	32.7116	95.19	1.04		1.8	concordant
Spot 84	1158.72	1347.56	139343	1.442	20.1589	1.32464	0.100977	1.78753	0.0148828	1.19991	0.671269	95.234	1.13433	97.6776	1.66466	157.722	30.9866	95.26	1.14		2.7	concordant
Spot 191	528.763	579.623	27613.9	2.44313	20.1404	1.23418	0.100183	1.92353	0.0148981	1.44422	0.750819	95.3312	1.36667	96.945	1.77851	136.846	29.8275	95.38	1.37		1.8	concordant
Spot 250	622.807	651.889	278022	5.03263	20.1113	1.13051	0.101897	1.66993	0.0149665	1.22905	0.735992	95.7654	1.16831	98.5257	1.56801	165.824	26.4283	95.8	1.17		3	concordant
Spot 236	1047.28	1115.6	164542	3.60216	20.5674	0.803221	0.0997632	1.4646	0.0150083	1.22417	0.83584	96.0308	1.16686	96.5577	1.34902	109.588	19.0004	96.07	1.17		0.57	concordant
Spot 270	307.196	334.738	21303.2	2.6212	19.9443	1.25008	0.101744	1.67309	0.0150535	0.979477	0.585429	96.318	0.9364	98.3846	1.56883	148.75	31.7892	96.34	0.94		2.2	concordant
Spot 253	1362.85	1561.03	72336.5	1.61605	20.5762	0.997848	0.0998412	1.5191	0.0150667	1.14339	0.752674	96.4018	1.09404	96.6298	1.40022	102.244	23.6724	96.41	1.09		0.25	concordant
Spot 131	1104.65	1292.22	212693	1.38396	20.5001	0.822752	0.100639	1.55043	0.015057	1.31412	0.847582	96.3405	1.25661	97.3661	1.43948	122.535	19.3612	96.42	1.26		1.1	concordant
Spot 300	677.214	736.681	406350	2.67621	20.7852	1.12159	0.0995962	1.84855	0.0151326	1.46941	0.794899	96.8203	1.41206	96.4035	1.70009	86.128	26.5783	96.79	1.41		-0.45	concordant
Spot 145	386.192	422.341	28477.9	2.51056	20.0902	1.50313	0.102616	1.73315	0.0151739	0.855989	0.493893	97.0828	0.824792	99.1883	1.63778	150.098	35.3205	97.09	0.82		2.3	concordant
Spot 6	306.642	366.467	39375.8	1.20452	19.9802	1.41925	0.103472	1.72894	0.0151938	0.961744	0.556261	97.209	0.927888	99.976	1.64616	166.444	33.5764	97.22	0.93		2.9	concordant
Spot 160	211.982	258.095	13404.1	1.0803	18.6711	1.90457	0.10967	2.19894	0.0152302	1.04457	0.475033	97.44	1.01017	105.663	2.20666	295.281	44.1702	97.34	1.01		8.5	discord.
Spot 144	725.949	858.015	69872.8	1.29177	20.2473	1.02434	0.102915	1.61095	0.0152429	1.23731	0.768062	97.5204	1.19755	99.4633	1.52633	146.31	24.195	97.58	1.2		2.1	concordant
Spot 92	527.465	593.925	17382.2	1.86509	19.2302	1.65253	0.107207	2.05833	0.0152907	1.19326	0.579723	97.8242	1.15849	103.408	2.02368	234.086	38.6875	97.77	1.16		5.8	discord.
Spot 82	1326.37	1449.43	82063.3	2.53298	20.6877	1.00042	0.101446	1.69957	0.0153547	1.37307	0.807894	98.2306	1.33855	98.1107	1.58943	95.2205	23.7147	98.22	1.34		-0.13	concordant
Spot 306	1211.96	1361.26	191550	1.90771	19.1272	1.44675	0.110273	2.20102	0.0154431	1.65873	0.753621	98.7915	1.62619	106.215	2.21969	276.103	33.1226	98.46	1.63		7.6	discord.
Spot 162	1113.92	1262.02	192289	1.7675	20.2193	1.0011	0.10459	1.45678	0.0154317	1.05812	0.726338	98.7196	1.03661	101.004	1.4006	155.241	23.4439	98.76	1.04		2.4	concordant
Spot 207	144.588	156.912	18899.7	2.75711	19.3297	2.19056	0.107785	2.55965	0.0154584	1.32307	0.516895	98.8887	1.29838	103.937	2.5288	221.263	50.6932	98.87	1.3		5.2	discord.
Spot 143	964.855	1067.68	47762.8	2.20516	20.4053	1.11082	0.103464	1.78915	0.0154753	1.40046	0.78275	98.9959	1.3758	99.9688	1.70337	123.208	26.2258	99.04	1.38		1	concordant
Spot 232	651.362	707.743	43650.1	2.71493	20.0005	0.897045	0.105469	1.46022	0.0155045	1.14964	0.787305	99.1814	1.1315	101.812	1.41459	163.829	21.0382	99.24	1.13		2.7	concordant
Spot 171	915.451	1010.87	59111.7	2.25452	20.4827	1.11065	0.103311	1.70812	0.0155149	1.29768	0.75971	99.2476	1.27805	99.8285	1.62405	113.726	26.1885	99.28	1.28		0.61	concordant
Spot 288	1447.3	1590.93	439466	2.36799	20.3132	0.70044	0.10455	1.27071	0.0155253	1.06022	0.834353	99.3135	1.04487	100.968	1.22128	140.216	16.446	99.41	1.05		1.7	concordant
Spot 295	593.933	652.688	25224.8	2.37552	19.9292	1.38299	0.105868	1.89651	0.0155927	1.29702	0.683902	99.7416	1.28372	102.179	1.84352	159.384	32.3734	99.78	1.28		2.5	concordant
Spot 225	773.906	843.803	153273	2.60195	19.7764	1.08037	0.108436	1.64999	0.015683	1.24675	0.755609	100.314	1.24099	104.534	1.63899	201.786	25.0912	100.3	1.24		4.3	discord.
Spot 39	1245.51	1437.53	201514	1.52436	20.0566	0.923696	0.106899	1.43367	0.0156835	1.09615	0.764577	100.318	1.09113	103.125	1.40587	168.457	21.5831	100.37	1.09		2.9	concordant
Spot 194	510.881	589.601	94757	1.52511	19.9363	1.06896	0.107508	1.53686	0.0157067	1.10188	0.716969	100.465	1.09843	103.684	1.51482	178.273	24.9662	100.49	1.1		3.3	concordant
Spot 224	877.428	1057.64	705121	1.14416	19.7589	0.889612	0.109129	1.3331	0.0157458	0.992846	0.744765	100.713	0.992153	105.168	1.33183	207.326	20.6515	100.69	0.99		4.6	discord.
Spot 212	587.196	668.839	151986	1.69018	18.5803	1.95456	0.116349	2.33354	0.0158243	1.2748	0.546293	101.211	1.28016	111.757	2.4695	342.688	44.2424	100.95	1.28		10	discord.
Spot 132	459.788	497.983	36904.8	2.82891	19.9303	1.2875	0.107951	1.72838	0.0158054	1.14974	0.665213	101.092	1.15323	104.089	1.70992	173.243	30.1063	101.12	1.15		3.1	concordant
Spot 217	1303.92	1458.57	63238.3	1.98137	19.9572	1.58442	0.10804	2.03308	0.015815	1.27203	0.625667	101.152	1.27664	104.171	2.01286	173.761	36.9959	101.17	1.28		3.1	concordant
Spot 91	871.659	1034.26	44168.4	1.25973	19.5875	1.24744	0.110343	1.78165	0.0158732	1.27102	0.713393	101.522	1.28025	106.279	1.7978	214.293	28.942	101.49	1.28		4.8	discord.
Spot 291	531.828	574.52	85595	2.92746	20.006	0.906169	0.108263	1.55678	0.0158768	1.26533	0.812783	101.544	1.2748	104.375	1.54417	169.465	21.2006	101.62	1.28		2.9	concordant
Spot 280	477.391	529.998	30724.9	2.13254	20.0156	1.06693	0.109211	1.57917	0.0161254	1.1617	0.735639	103.122	1.18843	105.243	1.57874	153.51	25.0319	103.18	1.19		2.1	concordant
Spot 188	1265.22	1280.86	44457.3	19.0019	19.8618	1.06171	0.110605	1.6943	0.0161445	1.32036	0.779293	103.243	1.35232	106.518	1.71331	180.381	24.7461	103.29	1.36		3.3	concordant		high U/Th
Spot 83	682.415	739.841	152808	2.79258	19.4954	1.09171	0.113508	1.721	0.0161751	1.33039	0.773029	103.437	1.36513	109.169	1.78133	236.095	25.19	103.32	1.37		5.7	discord.
Spot 311	452.266	515.606	72454	1.67796	20.2893	1.70795	0.108623	2.17249	0.01616	1.34201	0.617728	103.342	1.3758	104.705	2.16136	135.816	40.1353	103.37	1.38		1.4	concordant
Spot 228	1334.74	1534.73	254144	1.56844	20.5806	1.20231	0.10759	1.68488	0.0161838	1.18026	0.700502	103.492	1.21173	103.758	1.66185	109.883	28.4076	103.5	1.21		0.27	concordant
Spot 56	1960.84	2333.56	172946	1.23632	20.3324	0.980012	0.108839	1.53541	0.0162058	1.18172	0.769645	103.632	1.21485	104.902	1.53027	133.841	23.0468	103.69	1.22		1.3	concordant
Spot 106	747.225	809.24	136695	2.83157	18.5051	1.05008	0.121243	1.62788	0.0163854	1.24389	0.764116	104.771	1.2927	116.199	1.78735	357.037	23.6931	103.8	1.3		11	discord.
Spot 214	233.356	271.195	34915.4	1.44929	19.6961	1.78537	0.112252	1.94391	0.0162763	0.760682	0.391316	104.079	0.785354	108.024	1.99204	195.913	41.566	104.08	0.79		3.9	discord.
Spot 25	551.81	678.681	49205.6	1.02211	19.3579	1.37969	0.115425	3.32621	0.0164029	3.02371	0.909058	104.882	3.14568	110.916	3.49494	242.433	31.9341	104.43	3.18		5.9	discord.
Spot 45	440.805	501.866	29061.2	1.69647	18.1464	1.57863	0.122152	1.76096	0.016366	0.777685	0.441625	104.648	0.807262	117.022	1.9464	376.545	35.5371	104.45	0.81		12	discord.
Spot 307	1137.71	1322	45833.6	1.45077	19.3528	1.54065	0.115256	1.97786	0.0164092	1.24012	0.626999	104.922	1.29062	110.762	2.07547	238.205	35.5254	104.87	1.29		5.7	discord.
Spot 79	1515.63	1747.99	337394	1.53285	20.2393	0.826357	0.111146	1.40217	0.0164111	1.13278	0.807875	104.934	1.17905	107.014	1.42415	153.57	19.3356	105.03	1.18		2.1	concordant
Spot 38	1191.25	1439.54	111982	1.12745	20.7354	0.943533	0.108342	1.37098	0.0164357	0.992836	0.724182	105.09	1.03492	104.447	1.36076	89.8023	22.397	105.05	1.03		-0.65	concordant
Spot 135	536.812	581.783	85103.5	2.80516	19.8844	1.17395	0.113139	1.78983	0.0164589	1.35065	0.754626	105.237	1.40985	108.832	1.84716	188.223	27.3133	105.27	1.41		3.5	concordant
Spot 305	262.082	289.932	87696.5	2.21148	19.9861	2.0089	0.112347	2.21599	0.0164713	0.931747	0.420466	105.316	0.973304	108.11	2.27258	170.102	46.9509	105.33	0.97		2.8	concordant
Spot 206	906.37	1019.37	69500.3	1.88492	20.5923	0.934773	0.109091	1.51962	0.0164891	1.19567	0.786825	105.429	1.25033	105.134	1.5177	98.4527	22.2011	105.41	1.25		-0.3	concordant
Spot 34	876.747	1024.31	72810.3	1.39621	20.1498	1.02484	0.112462	1.5424	0.0165965	1.14532	0.742559	106.11	1.20535	108.215	1.58323	154.816	24.1865	106.17	1.21		2.1	concordant
Spot 309	593.052	669.979	301646	1.81168	19.6744	1.05353	0.115623	1.41902	0.0166472	0.950626	0.669918	106.431	1.00346	111.096	1.49329	212.246	24.4116	106.43	1.01		4.5	discord.
Spot 211	227.004	256.568	83961.8	1.80438	17.9453	2.43669	0.126899	2.63809	0.0166915	1.00874	0.382374	106.713	1.06759	121.307	3.01643	417.848	54.4629	106.51	1.07		14	discord.
Spot 54	1073.45	1217.22	43321.9	1.75462	20.2885	0.782121	0.111733	1.50927	0.0166729	1.28989	0.854647	106.594	1.36364	107.549	1.5402	128.779	18.4386	106.69	1.36		0.94	concordant
Spot 244	575.661	649.962	124888	1.82071	19.3091	1.0677	0.119224	1.63619	0.0168399	1.23954	0.757576	107.653	1.32332	114.368	1.76975	256.479	24.5718	107.48	1.33		6.4	discord.
Spot 60	813.83	975.645	202766	1.1819	20.2426	1.03564	0.114102	1.60342	0.0169095	1.22409	0.763422	108.094	1.31213	109.711	1.66742	144.92	24.2916	108.16	1.31		1.6	concordant
Spot 235	759.929	885.194	18833.9	1.42564	20.0317	0.995967	0.114413	1.54308	0.0169993	1.17806	0.763445	108.663	1.26939	109.994	1.6086	138.915	23.3834	108.73	1.27		1.3	concordant
Spot 159	1292.28	1533.7	49969.6	1.25789	19.9819	0.927347	0.116588	1.36403	0.0170742	0.997046	0.730957	109.138	1.079	111.974	1.44616	172.676	21.7383	109.2	1.08		2.7	concordant
Spot 271	833.974	935.095	86298.2	1.9381	20.268	1.10428	0.115205	1.65428	0.0171425	1.23062	0.743901	109.571	1.33701	110.716	1.73524	135.414	26.0034	109.62	1.34		1.1	concordant
Spot 108	878.869	1017.96	44074.1	1.48492	20.2739	0.887921	0.115567	1.53174	0.017186	1.24704	0.814131	109.847	1.35823	111.045	1.61122	136.838	20.8984	109.93	1.36		1.1	concordant
Spot 239	671.844	713.553	135644	3.78534	20.3182	1.1021	0.115867	1.68988	0.0172267	1.28087	0.757967	110.105	1.39832	111.318	1.78168	137.322	25.8834	110.16	1.4		1.2	concordant
Spot 101	1044.32	1195.42	149564	1.62416	19.9914	0.848048	0.118071	1.41831	0.0172502	1.13607	0.801002	110.254	1.24191	113.321	1.52081	178.225	19.7974	110.35	1.24		2.9	concordant
Spot 265	1088.24	1299.06	561975	1.21306	20.542	0.857833	0.11532	1.46133	0.0173322	1.18305	0.809571	110.774	1.29931	110.82	1.53421	111.839	20.2608	110.78	1.3		0.045	concordant
Spot 14	1411.15	1573.35	91826.5	2.0445	20.4792	0.8084	0.116054	1.43774	0.0174437	1.18863	0.826734	111.48	1.31369	111.489	1.51805	111.678	19.0966	111.48	1.31		0.0082	concordant
Spot 213	1843.11	2131.73	1.08492e+06	1.50068	20.3307	0.855823	0.118465	1.4787	0.0175948	1.20587	0.815493	112.437	1.34409	113.679	1.59029	139.765	20.1084	112.53	1.34		1.2	concordant
Spot 104	771.674	888.178	51903.1	1.55655	19.6673	1.10154	0.122221	1.52754	0.0176325	1.056	0.691306	112.676	1.17952	117.083	1.68923	207.607	25.6194	112.7	1.18		4.1	discord.
Spot 126	224.759	259.177	19982.6	1.53464	17.1847	1.89066	0.140605	2.25373	0.0178234	1.1154	0.494914	113.885	1.25912	133.583	2.82097	499.843	43.1145	113.23	1.26		17	discord.
Spot 281	1899.51	2322.47	166040	1.05537	20.8947	0.746651	0.116404	1.1699	0.0178034	0.900358	0.769601	113.758	1.01525	111.807	1.23859	70.4641	17.7834	113.56	1.01		-1.8	rev discord.
Spot 80	710.985	810.571	48662.6	1.67775	20.575	1.09814	0.118367	1.67205	0.0178627	1.23969	0.741416	114.134	1.40246	113.59	1.7969	102.198	26.5543	114.1	1.4		-0.5	concordant
Spot 185	302.454	347.225	10122.2	1.58758	15.5915	3.3971	0.154149	3.52866	0.0179469	0.91346	0.258869	114.667	1.03818	145.569	4.78544	684.257	72.7883	114.33	1.04		25	discord.
Spot 48	201.37	229.392	44273.8	1.6888	19.7736	1.50339	0.123744	1.71766	0.0180119	0.817728	0.47607	115.079	0.93268	118.46	1.92055	186.901	35.165	115.1	0.93		3.1	concordant
Spot 94	1038.17	1043.62	871023	44.7192	17.5473	2.33254	0.147697	3.69834	0.0189108	2.87001	0.776027	120.768	3.4338	139.876	4.83263	477.71	51.5889	118.1	3.44		16	discord.		high U/Th
Spot 248	981.851	1090.95	59758.4	2.11486	19.9425	0.845191	0.129042	1.51131	0.0188759	1.25181	0.828298	120.547	1.495	123.237	1.7539	175.422	19.7643	120.71	1.5		2.3	concordant
Spot 97	1630.87	1994.37	212745	1.05437	20.2359	0.935299	0.130967	1.49452	0.0193469	1.16566	0.779958	123.527	1.4262	124.966	1.75728	152.402	21.9117	123.62	1.43		1.2	concordant
Spot 41	158.497	181.807	19140.3	1.5979	15.7091	4.79336	0.16884	4.91106	0.0196318	0.978157	0.199174	125.329	1.21407	158.411	7.20331	687.012	102.739	125.12	1.21		25	discord.
Spot 283	487.008	522.638	38405.4	3.21217	17.8417	2.90558	0.150396	3.08795	0.0197228	1.02039	0.330443	125.904	1.27225	142.261	4.09912	424.561	65.0362	125.76	1.27		13	discord.
Spot 123	1688.11	2175.99	44809.7	0.813117	17.3605	1.7235	0.161971	2.89594	0.0206054	2.31156	0.798207	131.481	3.00848	152.427	4.09887	491.944	38.4699	128.14	3.02		16	discord.
Spot 293	323.685	373.07	63172.2	1.54027	19.7751	1.39162	0.139682	1.77739	0.0202716	1.10477	0.621571	129.372	1.41502	132.76	2.21192	193.84	32.3774	129.43	1.42		2.8	concordant
Spot 258	1876.36	1993.24	217720	3.7726	20.2468	0.770672	0.137103	1.19056	0.0203085	0.907179	0.761978	129.605	1.16401	130.461	1.45757	146.089	18.0613	129.66	1.16		0.7	concordant
Spot 226	373.542	416.146	57445.7	2.06042	19.7723	1.1207	0.143031	1.61274	0.0207479	1.159	0.718651	132.381	1.51864	135.74	2.04912	194.938	26.0683	132.48	1.52		2.7	concordant
Spot 52	399.093	413.102	59214.2	6.69468	10.4976	0.808446	0.981437	2.90272	0.0754549	2.78785	0.960427	468.936	12.6091	694.341	14.5998	1514.82	15.2556	133.1	7.52		140	discord.
Spot 107	561.246	614.435	47002	2.47968	19.4581	1.14899	0.154036	1.77395	0.0219695	1.34727	0.759473	140.091	1.86704	145.469	2.40422	234.109	26.6313	140.22	1.87		4	discord.
Spot 172	1071.53	1141.86	156896	3.58044	16.7276	2.33628	0.182162	2.58594	0.0222615	1.10825	0.428565	141.933	1.55577	169.919	4.04605	579.869	50.763	141.22	1.56		19	discord.
Spot 173	205.746	233.737	9362.63	1.72733	19.8122	1.41628	0.154841	1.77417	0.0231007	1.06592	0.600799	147.223	1.55149	146.177	2.4154	129.225	33.3691	147.18	1.55		-0.76	concordant
Spot 148	629.184	717.537	55754.3	1.67351	19.6257	1.04339	0.170027	1.70473	0.024432	1.34707	0.790192	155.605	2.07101	159.443	2.51542	216.834	24.1791	155.86	2.07		2.6	concordant
Spot 223	941.249	1036.49	94335.6	2.32245	20.062	0.875984	0.17012	1.45998	0.0249982	1.16711	0.799403	159.167	1.83492	159.523	2.15528	164.788	20.5018	159.21	1.83		0.24	concordant
Spot 147	296.466	337.081	23585.6	1.71536	19.6617	1.13145	0.173045	1.46911	0.0250899	0.881357	0.599927	159.744	1.39061	162.058	2.20054	196.03	27.3293	159.81	1.39		1.6	concordant
Spot 71	679.716	779.379	50255.7	1.60273	19.3653	0.856655	0.179504	1.52559	0.0254987	1.25802	0.82461	162.314	2.01645	167.634	2.35746	243.383	19.8912	162.69	2.02		3.5	concordant
Spot 233	208.874	243.058	29615.2	1.43593	18.9397	1.08588	0.184586	1.53204	0.0257677	1.05343	0.687596	164.005	1.70588	171.999	2.424	283.421	25.4421	164.12	1.71		5.2	discord.
Spot 269	741.199	764.907	109078	7.34693	19.9396	0.858926	0.176907	1.46714	0.0258618	1.18806	0.809783	164.597	1.93076	165.396	2.23926	176.825	20.0525	164.7	1.92		0.52	concordant
Spot 231	729.489	777.877	37644.4	3.54281	19.4462	0.814898	0.180927	1.4546	0.0258818	1.20481	0.828276	164.722	1.95945	168.858	2.26285	227.201	18.8367	165.11	1.96		2.7	concordant
Spot 47	570.483	635.588	246536	2.05918	19.7433	0.840585	0.179883	1.55773	0.0260021	1.3114	0.841867	165.478	2.14247	167.96	2.41143	203.058	19.5197	165.81	2.14		1.6	concordant
Spot 182	464.158	507.842	45247	2.49697	19.6544	1.03696	0.180624	1.63206	0.0260563	1.2517	0.766945	165.819	2.04909	168.598	2.53532	207.759	24.288	166.03	2.05		1.8	concordant
Spot 85	203.745	245.039	449140	1.1595	19.9052	1.30604	0.17989	1.60779	0.0261414	0.937677	0.583208	166.354	1.53991	167.966	2.48901	190.771	30.382	166.41	1.54		1	concordant
Spot 13	284.96	337.112	865561	1.28404	18.7179	1.77947	0.191062	2.09133	0.0261682	1.09871	0.525365	166.522	1.80617	177.535	3.40639	326.805	40.3922	166.51	1.81		7	discord.
Spot 199	144.34	160.85	14195.9	2.05454	20.3439	1.80455	0.172872	2.2888	0.0262651	0.903939	0.39494	167.13	1.49134	161.908	3.42542	86.2194	49.8738	167.02	1.49		-3.4	rev discord.
Spot 260	1079.7	1112	102367	7.856	20.1343	0.727349	0.178944	1.29258	0.0263934	1.06652	0.82511	167.936	1.76794	167.152	1.9921	156.032	17.0967	167.8	1.76		-0.51	concordant
Spot 267	241.462	278.258	25198.6	1.54212	19.2378	1.4558	0.185537	1.685	0.0263969	0.813167	0.48259	167.958	1.34814	172.814	2.67761	239.824	34.0112	168.02	1.35		3.1	concordant
Spot 204	541.715	584.322	154435	2.98783	19.1098	1.01141	0.188786	1.63719	0.0264218	1.28738	0.78633	168.115	2.13629	175.593	2.63996	277.542	23.1689	168.39	2.15		4.7	discord.
Spot 49	250.548	268.33	13069.6	3.31125	19.3918	1.20195	0.182855	1.50677	0.0264752	0.906653	0.601718	168.45	1.50747	170.514	2.36512	199.232	27.9663	168.52	1.51		1.3	concordant
Spot 121	831.367	892.112	109382	3.21622	19.106	1.27412	0.190623	1.77303	0.0266056	1.23285	0.695336	169.269	2.05967	177.161	2.88236	283.838	29.1443	169.42	2.07		5	discord.
Spot 81	145.345	171.395	21941.7	1.31114	20.4279	1.46594	0.177022	1.67393	0.0267254	0.796079	0.475576	170.021	1.33581	165.495	2.55629	101.209	34.826	169.87	1.33		-2.9	rev discord.
Spot 299	757.533	818.83	269798	2.90423	19.3429	1.02831	0.188652	1.70165	0.0266826	1.35576	0.796733	169.752	2.2714	175.478	2.74225	253.35	23.6734	170.1	2.28		3.6	concordant
Spot 164	534.152	584.13	139883	2.51166	19.7968	1.07625	0.185172	1.79081	0.0268014	1.43122	0.799203	170.498	2.40822	172.501	2.84102	200.079	24.9968	170.72	2.4		1.3	concordant
Spot 24	443.727	512.908	9778.62	1.50728	12.9108	5.67454	0.280995	5.80864	0.0270207	1.20374	0.207233	171.875	2.04159	251.446	12.9383	1079.79	114.095	171.1	2.04		42	discord.
Spot 274	226.679	248.993	72507.1	2.3873	18.3439	1.76984	0.200489	1.99502	0.0269763	0.919566	0.460932	171.596	1.55712	185.54	3.38307	366.953	39.8919	171.54	1.56		8.5	discord.
Spot 11	179.255	200.386	10688.9	1.99347	19.4273	1.40582	0.186288	1.68388	0.0271996	0.860678	0.511127	172.998	1.46915	173.457	2.68496	179.696	33.7364	173.01	1.47		0.29	concordant
Spot 68	154.853	180.783	44431.1	1.40347	18.2251	1.69127	0.204089	1.8966	0.0273139	0.82544	0.43522	173.715	1.41477	188.58	3.26414	379.01	38.387	173.65	1.42		9	discord.
Spot 304	53.0577	60.3205	166786	1.71677	14.5109	3.31213	0.267562	3.96743	0.0283956	2.18411	0.550509	180.499	3.88762	240.742	8.50363	878.846	68.542	175.94	3.88		32	discord.
Spot 110	131.646	145.991	14369.1	2.15654	19.3354	1.6881	0.193417	1.96715	0.0278038	0.962725	0.489401	176.788	1.67886	179.54	3.23721	215.951	39.7249	176.84	1.68		1.7	concordant
Spot 140	1104	1236.05	82748.3	1.96469	19.9665	0.650131	0.191588	1.04638	0.0279626	0.819843	0.783503	177.784	1.43764	177.984	1.70829	180.61	15.1761	177.81	1.43		0.12	concordant
Spot 184	550.349	606.423	60602.9	2.30644	17.867	2.60671	0.224765	2.87892	0.0294291	1.22086	0.42407	186.974	2.24991	205.868	5.36461	428.073	58.162	186.86	2.25		11	discord.
Spot 282	674.502	779.979	30201.2	1.50276	19.5855	0.687353	0.204359	1.12514	0.0295241	0.890325	0.791301	187.569	1.64591	188.808	1.93854	204.351	15.9683	187.73	1.64		0.72	concordant
Spot 198	186.112	208.971	46491.3	1.9133	19.5192	1.03126	0.20803	1.39401	0.0298646	0.937698	0.67266	189.701	1.7529	191.899	2.43751	219.026	23.8718	189.83	1.75		1.3	concordant
Spot 125	471.345	511.593	142549	2.75211	19.7852	0.838531	0.209479	1.64646	0.0302508	1.41682	0.860525	192.118	2.68181	193.115	2.89551	205.348	19.4679	192.35	2.66		0.57	concordant
Spot 230	399.385	457.96	56319.8	1.60232	18.5277	1.09012	0.223876	1.93787	0.0304281	1.60138	0.826362	193.227	3.04839	205.131	3.59938	344.241	24.6718	193.57	3.08		6.6	discord.
Spot 103	795.62	902.991	104922	1.74135	19.7431	0.933824	0.211049	1.51622	0.0304788	1.19426	0.787655	193.544	2.27706	194.432	2.68295	205.226	21.6736	193.66	2.27		0.5	concordant
Spot 115	723.411	823.585	55246.8	1.69706	19.8106	0.958257	0.215822	1.75773	0.0312913	1.46367	0.832708	198.625	2.86289	198.426	3.16816	196.085	22.6276	198.58	2.84		-0.11	concordant
Spot 273	252.616	276.995	46961.9	2.43512	19.2524	1.25113	0.224398	1.48547	0.0317623	0.798071	0.53725	201.569	1.58377	205.564	2.76435	251.646	28.8445	201.68	1.58		2.2	concordant
Spot 218	482.266	527.025	167059	2.53206	19.6659	0.886792	0.223145	1.61985	0.0321072	1.35516	0.836597	203.723	2.71761	204.524	3.00065	213.787	20.5559	203.89	2.7		0.43	concordant
Spot 192	1131.13	1290.14	2.04374e+07	1.67161	19.6386	0.833699	0.223905	1.44268	0.032119	1.1774	0.816121	203.797	2.36198	205.155	2.67989	220.765	19.2835	204.02	2.35		0.73	concordant
Spot 142	151.548	170.193	15470.2	1.91012	18.9163	1.50235	0.231665	1.79139	0.0325023	0.913326	0.50984	206.191	1.85339	211.572	3.4213	271.898	35.3262	206.3	1.85		2.8	concordant
Spot 169	278.861	310.801	57029.5	2.05168	18.9268	1.19361	0.235544	1.44962	0.0326781	0.818472	0.564612	207.288	1.66961	214.765	2.80607	297.541	27.3083	207.46	1.67		3.9	discord.
Spot 279	144.398	162.307	19536.2	1.89478	19.0813	1.26538	0.243522	1.55153	0.0344581	0.895553	0.577207	218.39	1.92304	221.3	3.08515	252.387	29.1594	218.51	1.92		1.5	concordant
Spot 19	852.712	866.628	349503	14.3991	19.3238	0.882984	0.255458	1.67221	0.0361057	1.42007	0.849214	228.649	3.19006	231	3.45494	255.004	20.2798	229.2	3.17		1.1	concordant		high U/Th
Spot 216	347.888	367.806	48763.6	4.10461	17.2592	2.31528	0.288894	2.56566	0.0365901	1.08779	0.423982	231.662	2.47526	257.689	5.83923	501.657	51.1723	231.52	2.48		12	discord.
Spot 222	168.653	170.188	7301.16	25.8251	12.3063	3.9764	0.455239	6.11096	0.0419259	4.63988	0.759272	264.759	12.0357	380.942	19.4132	1165.87	78.8265	232.8	11.8		46	discord.		high U/Th
Spot 238	1585.72	1692.87	228773	3.47793	12.5001	0.806385	0.624714	1.86225	0.0570595	1.67856	0.901361	357.718	5.84096	492.798	7.27077	1182.29	15.9422	250.49	5.58		57	discord.
Spot 55	659.775	683.465	202794	6.54482	11.6366	0.619172	0.80503	1.51078	0.0684795	1.37802	0.912123	426.988	5.69335	599.662	6.84173	1321.46	11.9986	263.17	5.22		71	discord.
Spot 88	1383.55	1391.28	730592	42.0601	11.6885	2.69909	0.509771	3.04543	0.0435282	1.41052	0.46316	274.665	3.79284	418.295	10.4414	1314.11	52.354	265.61	3.77		50	discord.		high U/Th
Spot 201	1934.04	2059.1	682357	3.63419	18.7653	0.721929	0.318077	1.23398	0.0436725	1.00076	0.811	275.557	2.69954	280.422	3.02363	321.22	16.3971	276.53	2.69		2	concordant
Spot 178	1627.92	2062.25	387418	0.880824	19.4076	0.75974	0.313866	1.36539	0.0444841	1.13447	0.83088	280.568	3.11469	277.173	3.31192	248.601	17.4908	279.46	3.04		-1.4	concordant
Spot 78	668.965	701.724	138380	4.79891	18.0869	0.961861	0.498313	1.79487	0.0658201	1.51436	0.843718	410.924	6.02869	410.56	6.06132	408.493	21.5555	410.75	5.8		-0.11	concordant
Spot 4	496.663	656.233	688234	0.73144	17.6322	0.767326	0.575279	1.45401	0.0739743	1.23505	0.849411	460.055	5.48389	461.423	5.39165	468.233	17.0003	460.81	5.24		0.38	concordant
Spot 149	1186.62	1199.22	435401	22.1259	12.0423	0.572129	1.1363	1.33756	0.0997957	1.20902	0.903898	613.211	7.07216	770.753	7.22408	1259.31	11.1968	518.16	9.15		40	discord.		high U/Th
Spot 313	1243.73	1268.64	452478	11.736	10.1298	0.961271	1.72795	2.1831	0.127857	1.96007	0.897838	775.627	14.3238	1018.99	14.0419	1586.74	17.9677	551.8	17.4		63	discord.		high U/Th
Spot 72	1846.65	1970.48	1.26338e+06	3.50454	17.4341	0.620657	0.763616	1.21413	0.0970894	1.0435	0.859464	597.329	5.95304	576.094	5.33787	493.206	13.683	578.45	5.18		-5.1	rev discord.
Spot 205	103.723	114.338	42163.3	2.2964	16.259	0.994919	0.793626	1.29467	0.0948288	0.80091	0.618622	584.032	4.47194	593.227	5.81671	628.528	21.9191	585.62	4.41		2	concordant
Spot 141	319.22	337.395	206899	4.12749	16.6483	0.748126	0.792586	1.07989	0.0962248	0.778645	0.721044	592.246	4.406	592.638	4.84816	594.121	16.2001	592.38	4.25		0.084	concordant
Spot 46	180.479	223.607	2.51947e+06	0.983407	16.1723	0.788314	0.901007	1.08189	0.106568	0.740977	0.684891	652.787	4.60015	652.266	5.20668	650.444	16.9244	652.63	4.44		-0.1	concordant
Spot 114	454.741	473.022	309546	5.84564	11.0112	0.706729	1.68027	1.55738	0.134761	1.38777	0.891092	814.972	10.6242	1001.09	9.91375	1434.61	13.4816	817.8	18.1		31	discord.
Spot 27	219.03	242.423	173748	2.20033	13.4473	0.723157	1.56817	1.35373	0.154082	1.14433	0.845318	923.806	9.84885	957.703	8.39345	1036.37	14.626	956.46	8.72		5.4	discord.
Spot 151	786.678	799.953	486442	13.9259	10.5701	0.800099	2.09364	1.327	0.16138	1.05866	0.797785	964.443	9.48313	1146.72	9.11895	1509.93	15.1069	1014.5	11.4		26	discord.		high U/Th
Spot 139	370.943	410.411	1.53918e+06	2.20866	13.5207	0.570562	1.76228	0.994857	0.173577	0.814984	0.819197	1031.79	7.77049	1031.69	6.44471	1031.44	11.5508	1031.69	6.44		-0.015	concordant
Spot 2	640.055	694.31	503987	2.77235	13.4035	0.711484	1.83034	1.69197	0.178915	1.5351	0.907287	1061.04	15.0183	1056.4	11.1105	1046.84	14.3666	1053.6	10.3		-0.83	concordant
Spot 276	229.936	250.203	100733	2.66609	12.5815	0.922573	1.88274	1.66796	0.173512	1.38956	0.833093	1031.43	13.2446	1075.03	11.0616	1164.51	18.2821	1074	11.6		6.3	discord.
Spot 116	141.114	156.049	6.39603e+08	2.22032	12.7493	0.588593	2.18951	1.04744	0.203221	0.866424	0.827182	1192.6	9.4335	1177.71	7.30112	1150.42	11.6872	1175.76	7.2		-2	rev discord.
Spot 286	732.758	841.874	365608	1.57812	11.138	0.757631	2.23053	1.89593	0.181568	1.73796	0.916681	1075.54	17.2164	1190.68	13.2927	1406.24	14.5079	1274.4	12.6		20	discord.
Spot 117	363.517	405.978	443796	2.01187	11.375	0.661282	2.66143	1.65543	0.220562	1.51761	0.916746	1284.84	17.6787	1317.82	12.2188	1371.84	12.7237	1342.8	10.5		5.1	discord.
Spot 77	395.998	396.619	168550	149.77	11.4957	1.1974	2.75264	3.00842	0.230868	2.75986	0.917377	1339.05	33.3704	1342.8	22.4105	1348.77	23.1121	1345.6	19		0.57	concordant		high U/Th
Spot 130	481.859	539.787	1.21677e+06	1.95479	11.3616	0.675488	2.75796	1.30395	0.228395	1.11535	0.85536	1326.08	13.3683	1344.24	9.71716	1373.25	12.9943	1350.26	9.49		2.3	concordant
Spot 90	805.767	831.935	282742	7.23626	11.2169	0.705209	2.75069	1.41249	0.225472	1.22385	0.866445	1310.73	14.5156	1342.28	10.5187	1392.92	13.5283	1354.6	10.2		4.2	discord.
Spot 262	817.494	858.597	2.04945e+06	4.67385	10.8419	0.50467	2.50179	1.33179	0.198139	1.23247	0.925421	1165.32	13.1389	1272.55	9.6614	1458.57	9.59536	1364.88	8.19		18	discord.
Spot 137	400.842	435.807	282167	2.69405	10.8647	0.811701	2.84329	1.50484	0.225347	1.26713	0.842037	1310.07	15.0222	1367.04	11.3046	1457.22	15.4367	1380.1	11.5		7	discord.
Spot 8	357.472	394.402	407671	2.27471	10.9049	0.817383	3.03538	1.21768	0.241538	0.90256	0.741214	1394.69	11.3193	1416.56	9.30043	1449.58	15.5601	1413.19	9.38		2.4	concordant
Spot 189	786.16	837.615	2.85826e+06	3.59041	10.9953	0.644803	3.07789	1.4596	0.247186	1.30945	0.89713	1423.95	16.7302	1427.2	11.1866	1432.04	12.3038	1429.22	9.93		0.44	concordant
Spot 96	735.568	772.335	335814	4.70148	10.4601	1.06943	3.15351	1.56316	0.24081	1.14008	0.729341	1390.91	14.2634	1445.86	12.0513	1527.6	20.1457	1433.1	12.4		6	discord.
Spot 179	217.053	289.262	172298	0.706386	10.9126	0.595176	3.15231	1.1237	0.251093	0.953108	0.84819	1444.11	12.3312	1445.56	8.66221	1447.69	11.3335	1446.06	8.35		0.17	concordant
Spot 315	1122.57	1165.47	1.44775e+06	6.15004	10.7826	1.19819	3.22349	2.07706	0.253588	1.69662	0.816838	1456.95	22.1247	1462.82	16.0979	1471.34	22.7429	1463.9	15.9		0.66	concordant
Spot 259	263.251	310.525	128977	1.30863	10.6731	0.672782	3.27965	1.00749	0.256032	0.749921	0.744345	1469.51	9.85435	1476.24	7.83969	1485.9	12.7452	1475.61	7.85		0.71	concordant
Spot 287	197.095	234.937	238517	1.22396	10.7086	0.645638	3.39408	1.10007	0.265684	0.890649	0.809629	1518.86	12.0522	1503.03	8.62809	1480.77	12.2398	1500.02	8.47		-1.7	rev discord.
Spot 100	188.985	210.564	416650	2.05812	10.0098	0.702188	3.46993	1.12789	0.253285	0.882643	0.782563	1455.39	11.4991	1520.41	8.89051	1612.11	13.0812	1520.63	9.29		6.9	discord.
Spot 127	877.345	906.319	385624	7.11601	9.97778	0.713172	2.92698	1.98697	0.212985	1.85458	0.933367	1244.7	20.9922	1388.91	15.0389	1617.94	13.2759	1527.9	11.2		23	discord.
Spot 74	102.326	116.991	139667	1.63979	10.4868	0.731449	3.52251	1.08472	0.269623	0.800958	0.7384	1538.89	10.9651	1532.28	8.5789	1523.15	13.7871	1532.77	8.53		-0.68	concordant
Spot 7	405.419	441.524	993981	2.6388	10.4236	0.655218	3.61116	1.01783	0.274611	0.778889	0.765244	1564.16	10.8177	1551.99	8.09377	1535.44	12.3307	1551.59	8.04		-1.2	concordant
Spot 202	356.638	446.393	1.00784e+06	0.93377	10.2557	0.650947	3.65796	1.22202	0.274415	1.03421	0.846316	1563.17	14.3558	1562.25	9.74461	1560.97	12.2092	1561.91	9.29		-0.1	concordant
Spot 35	723.832	832.679	429587	1.56276	9.80973	0.493913	3.25087	1.30702	0.232748	1.21011	0.925848	1348.88	14.7283	1469.38	10.1496	1648.07	9.15989	1574.09	7.82		18	discord.
Spot 277	383.819	427.57	200351	2.06162	9.38481	0.819453	2.38966	2.65351	0.164089	2.52379	0.951113	979.463	22.9333	1239.51	18.9969	1725.15	15.0507	1593	11		54	discord.
Spot 229	589.191	678.858	773605	1.54417	9.47388	0.604217	3.47304	1.36045	0.240248	1.21891	0.895962	1387.99	15.221	1521.11	10.726	1711.58	11.1137	1605.49	9.6		17	discord.
Spot 87	685.096	763.862	733790	2.04402	9.77968	0.7192	3.82256	1.69315	0.273084	1.53281	0.905301	1556.44	21.1957	1597.51	13.6279	1652.1	13.3293	1625.7	11.4		5.1	discord.
Spot 99	363.135	384.119	6.31696e+06	4.06673	9.43788	0.659748	3.86001	1.20558	0.265578	1.00904	0.836973	1518.32	13.6499	1605.36	9.72282	1721.52	12.1219	1630.78	9.76		9.4	discord.
Spot 89	642.985	790.813	677322	1.02214	9.78881	0.574316	4.02148	1.32985	0.287568	1.19944	0.901938	1629.36	17.2691	1638.55	10.8144	1650.34	10.6478	1644.61	9.08		1.1	concordant
Spot 40	193.589	214.129	2.14896e+06	2.21484	9.72404	0.786577	4.05859	1.27089	0.288667	0.99823	0.785456	1634.86	14.4147	1646.03	10.3538	1660.29	14.563	1647.4	10.3		1.1	concordant
Spot 42	162.629	184.083	540387	1.78145	9.888	0.82806	4.07609	1.1882	0.294856	0.85213	0.717163	1665.75	12.5087	1649.53	9.68826	1628.92	15.3931	1650.93	9.57		-1.6	concordant
Spot 9	579.057	631.328	681367	2.60328	9.71763	0.645182	4.10058	1.46355	0.292207	1.31366	0.897588	1652.55	19.1497	1654.42	11.9477	1656.78	11.9502	1655.6	10.1		0.22	concordant
Spot 157	689.486	766.927	916665	2.0923	9.47293	0.812583	4.06674	1.37859	0.280905	1.11366	0.80782	1595.92	15.7439	1647.66	11.2357	1714.28	14.9419	1657.4	11.3		5.3	discord.
Spot 37	226.284	252.024	547145	2.06589	9.46961	0.491568	3.56444	1.51107	0.246331	1.42888	0.945606	1419.52	18.2054	1541.65	11.9823	1713.38	9.0411	1664.77	7.66		18	discord.
Spot 18	301.997	366.843	143426	1.09443	9.08749	0.598998	3.50168	1.46313	0.232986	1.3349	0.912356	1350.13	16.2607	1527.59	11.5567	1782.83	10.9202	1665.52	9.45		24	discord.
Spot 241	465.889	483.555	834781	6.19739	9.55647	0.585064	4.11238	1.30554	0.287076	1.1671	0.893963	1626.9	16.7811	1656.76	10.6636	1694.82	10.7841	1675.29	9.13		3.5	concordant
Spot 310	692.202	701.34	2.09093e+06	17.8004	9.39985	0.811138	4.1593	1.53285	0.285513	1.30065	0.848517	1619.07	18.6222	1666.04	12.5482	1725.73	14.8956	1684.2	12		5	discord.		high U/Th
Spot 50	411.959	434.328	463134	4.32774	9.60286	0.629871	4.26313	1.30641	0.299085	1.14453	0.876091	1686.77	16.9865	1686.27	10.7451	1685.64	11.6255	1686.01	9.59		-0.054	concordant
Spot 261	560.651	616.903	229283	2.3422	9.02795	0.613683	4.02958	1.20798	0.265867	1.04046	0.861323	1519.79	14.0871	1640.18	9.82725	1798.14	11.1694	1691.96	9.49		13	discord.
Spot 167	114.169	130.359	219974	1.65723	9.82914	0.602377	4.4064	1.05463	0.316191	0.865625	0.820783	1771.1	13.4054	1713.54	8.72807	1643.89	11.1787	1695.93	8.31		-5.7	rev discord.
Spot 16	362.346	421.772	761410	1.4329	9.45123	0.633823	4.3647	1.08935	0.301823	0.885973	0.813305	1700.34	13.2416	1705.68	8.99948	1712.23	11.6574	1707.05	8.78		0.53	concordant
Spot 296	394.303	440.237	755656	2.01726	9.38026	0.597214	4.43829	1.06253	0.304153	0.878807	0.82709	1711.87	13.2122	1719.52	8.80511	1728.83	10.9628	1721.92	8.48		0.77	concordant
Spot 289	766.425	840.224	620763	2.44054	9.29564	0.603814	4.36544	1.27757	0.296508	1.12588	0.881263	1673.97	16.5986	1705.82	10.5549	1745.15	11.0596	1723.56	9.29		3.5	concordant
Spot 59	1176.95	1264.92	709914	3.14413	9.21559	0.682579	4.24818	1.72809	0.286243	1.58757	0.918685	1622.73	22.7753	1683.38	14.2042	1759.8	12.4816	1729.8	10.9		7.4	discord.
Spot 61	1202.62	1259.24	3.26445e+07	4.99184	9.3908	0.633039	4.56722	1.34495	0.313271	1.18666	0.882305	1756.78	18.2478	1743.31	11.2038	1727.16	11.6228	1735.77	9.77		-1.5	concordant
Spot 290	2225.37	2636.65	2.10195e+06	1.27154	11.2594	0.671912	4.90887	1.00208	0.403788	0.743436	0.741893	2186.46	13.7852	1803.78	8.45316	1386.2	12.9012	1737.8	7.91		-33	rev discord.
Spot 62	745.608	761.819	732421	10.8086	8.41757	1.03428	4.52566	1.7003	0.278292	1.34954	0.793711	1582.75	18.9399	1735.7	14.141	1925.31	18.535	1746.9	15.5		15	discord.		high U/Th
Spot 187	1055.3	1067.15	258175	20.9405	9.007	0.65502	4.29112	1.5467	0.282309	1.40112	0.905878	1602.98	19.885	1691.66	12.7374	1803.37	11.9145	1753.7	10.3		11	discord.		high U/Th
Spot 30	118.647	124.883	180083	4.47087	8.98093	0.759485	4.67803	1.21324	0.30682	0.946075	0.779794	1725.04	14.319	1763.32	10.1498	1808.96	13.8029	1768.1	10.2		3.6	concordant
Spot 152	712.168	788.176	597015	2.20186	9.10368	0.610711	4.65393	1.32737	0.308934	1.17854	0.887872	1735.46	17.9313	1759	11.0946	1787.06	11.128	1772.89	9.49		2.6	concordant
Spot 175	365.291	395.363	284579	2.85455	9.253	0.582784	4.79765	0.907035	0.324096	0.695003	0.766236	1809.7	10.9663	1784.49	7.62147	1755.11	10.6636	1781.46	7.51		-2.3	rev discord.
Spot 98	651.221	730.682	650037	1.92595	8.80851	0.59546	4.49899	1.31899	0.288946	1.17693	0.892295	1636.26	17.0079	1730.79	10.9577	1847.03	10.7706	1789.78	9.26		11	discord.
Spot 93	547.968	639.096	343514	1.41309	9.05335	0.507498	4.82817	1.08138	0.31897	0.954889	0.88303	1784.69	14.8863	1789.82	9.0964	1795.78	9.23901	1792.72	7.86		0.54	concordant
Spot 294	1645.14	1803.82	8.32398e+06	2.43638	9.60058	0.814313	4.9884	1.29763	0.349858	1.01031	0.778585	1933.92	16.8803	1817.36	10.9761	1686.22	15.0286	1793.8	10.5		-10	rev discord.
Spot 1	459.68	505.09	513971	2.37887	9.03605	0.622281	4.88952	1.23486	0.322168	1.0666	0.863744	1800.31	16.7539	1800.45	10.4099	1800.6	11.3217	1800.52	9.38		0.014	concordant
Spot 302	179.145	217.63	152372	1.09392	9.0606	0.612768	4.91227	0.980729	0.325371	0.765623	0.780667	1815.91	12.1164	1804.37	8.27402	1791.04	11.1624	1802.44	8.15		-1.1	concordant
Spot 128	424.222	457.683	3.29832e+06	2.97932	8.91982	0.608174	5.01082	0.955901	0.325708	0.737476	0.771498	1817.54	11.6801	1821.15	8.09147	1825.26	11.0299	1821.63	8.04		0.33	concordant
Spot 195	402.842	436.406	313232	2.82049	8.83003	0.659344	4.87067	1.68021	0.314484	1.54544	0.919784	1762.73	23.8349	1797.2	14.1555	1837.41	11.9424	1822.9	10.6		3.9	discord.
Spot 111	642.364	673.549	1.32251e+06	4.84063	8.88683	0.631004	5.10055	1.08578	0.330362	0.883601	0.813794	1840.14	14.1448	1836.2	9.21789	1831.72	11.4368	1835.05	8.87		-0.37	concordant
Spot 66	282.093	321.313	790772	1.69027	8.90644	0.60605	5.11592	0.909944	0.33233	0.67875	0.745925	1849.66	10.9141	1838.75	7.72885	1826.4	10.9898	1838.08	7.68		-0.97	concordant
Spot 256	528.564	614.125	451717	1.45173	8.71145	0.640779	5.1185	1.27817	0.325671	1.10594	0.865256	1817.37	17.5144	1839.18	10.8576	1863.94	11.567	1849.91	9.71		2.2	concordant
Spot 166	572.683	631.342	708285	2.29432	8.82614	0.605752	5.2562	1.33493	0.338532	1.18958	0.891117	1879.61	19.3947	1861.78	11.3885	1841.92	10.9655	1851.15	9.54		-1.8	rev discord.
Spot 133	515.934	717.713	72084.3	0.600879	8.38588	0.739379	5.51438	1.9319	0.337788	1.78478	0.923845	1876.02	29.0511	1902.84	16.6065	1932.2	13.2402	1922.8	12		2.9	concordant
Spot 109	175.689	233.653	190937	0.712288	7.97013	0.918201	5.91755	1.93377	0.343794	1.70187	0.88008	1904.89	28.0681	1963.81	16.7982	2026.47	16.2612	1996.8	14.1		5.7	discord.
Spot 303	281.27	301.917	111921	3.20139	7.05323	0.523873	6.87429	1.05468	0.354456	0.915371	0.867914	1955.84	15.4423	2095.35	9.34929	2235.31	9.06529	2168.11	7.91		13	discord.
Spot 12	313.601	361.921	727917	1.52519	6.97744	0.597361	8.16828	1.06201	0.416952	0.878081	0.82681	2246.63	16.6565	2249.83	9.60759	2252.74	10.3174	2251.06	8.78		0.25	concordant
Spot 215	435.023	502.685	2.85072e+06	1.5109	6.02653	0.700648	10.0145	1.92818	0.440628	1.79638	0.931644	2353.45	35.4194	2436.12	17.8028	2505.89	11.7859	2491.8	10.8		6.9	discord.
Spot 120	209.754	231.907	4.23277e+06	2.22512	5.69807	0.742941	11.9886	1.1027	0.497755	0.814853	0.738962	2604.14	17.4572	2603.51	10.335	2603.01	12.3791	2603.4	10.1		-0.041	concordant

## Sheet: 18COA-5
Aliquot Name	18COA-5
Stratigraphic Formation Name	top of Upper Mbr, Coaledo Fm
Stratigraphic Age	Eocene
Rock Type	sandstone
Mineral	Zircon
Method	U-Pb
Latitude	43.342
Longitude	-124.358
Internal Uncertainty Level	one sigma
External Uncertainty 206/238 (% two sigma)	1.01721
External Uncertainty 206/207 (% two sigma)	0.810964
Analysis Purpose	DZ
Laboratory Name	Arizona LaserChron Center
Analyst Name	M. Darin
Aliquot Reference
Aliquot Instrumental Method	LA-ICPMS
Aliquot Instrumental Reference	Gehrels, G.E., Valencia, V., Ruiz, J., 2008, Enhanced precision, accuracy, efficiency, and spatial resolution of U-Pb ages by laser ablation-multicollector-inductively coupled plasma-mass spectrometry: Geochemistry, Geophysics, Geosystems, v. 9, Q03017, doi:10.1029/2007GC001805.
	Gehrels, G. and Pecha, M., 2014, Detrital zircon U-Pb geochronology and Hf isotope geochemistry of Paleozoic and Triassic passive margin strata of western North America: Geosphere, v. 10 (1), p. 49-65.
								Isotope ratios						Apparent ages (Ma)				Best Age
Analysis	U	eU	206Pb	U/Th	206Pb*	±	207Pb*	±	206Pb*	±	error	206Pb*	±	207Pb*	±	206Pb*	±	Concordia Age	±1σ	within 10% of YSCG (*)	Discordance (dc)	Concordance	Age Class	Notes
	(ppm)	(ppm)	204Pb		207Pb*	(%)	235U	(%)	238U	(%)	corr.	238U	(Ma)	235U	(Ma)	207Pb*	(Ma)	(Ma)	(Ma)		(%)
Spot 245	3928.71	4508.8	197122	1.59158	21.0913	0.73034	0.0367496	1.3703	0.00565683	1.15942	0.84611	36.3635	0.420421	36.6456	0.493201	55.1405	17.4299	36.369	0.421	--	0.787	concordant	P	high eU
Spot 164	854.381	925.598	11821.1	2.81924	20.7226	1.96605	0.0389949	2.77618	0.00603269	1.4388	0.518265	38.7724	0.556183	38.8423	1.05797	43.1462	NA	38.773	0.556	YSCG	0.183	concordant	Y	YSCG, YC2σ
Spot 89	3121.95	3362.1	129969	3.05503	21.1598	0.989972	0.0392174	2.24017	0.00606412	2.00954	0.897049	38.9738	0.780832	39.0597	0.858387	44.3414	23.6441	38.979	0.781	*	0.225	concordant	P	high eU
Spot 216	2744.14	3053.4	29084	2.0852	21.1561	1.06756	0.0390339	1.87902	0.00607921	1.5458	0.82266	39.0705	0.602124	38.8804	0.716761	27.1842	25.6258	39.062	0.602	*	-0.497	concordant	P	high eU
Spot 199	643.247	712.847	36619.9	2.17189	19.6493	2.20028	0.0423937	2.58949	0.00611795	1.36334	0.526491	39.3187	0.534418	42.1584	1.06934	206.869	51.0732	39.264	0.534	*	7.12	discord.	D	does not overlap concordia within 2σ
Spot 40	1591.42	2014.5	20242.7	0.883948	20.7613	1.36675	0.0397491	1.79116	0.00611068	1.15604	0.645414	39.2721	0.452622	39.5791	0.695287	58.2542	32.6321	39.274	0.453	*	0.794	concordant	P	high eU
Spot 46	1674.78	2088.03	20579.2	0.952369	21.3398	1.41828	0.0388192	1.86941	0.00613821	1.21141	0.648016	39.4485	0.476424	38.6705	0.709319	NA	NA	39.427	0.476	*	-2.03	rev discord.	S	YC2σ
Spot 146	509.927	555.248	7537.1	2.64411	20.7692	2.14899	0.0389749	3.04942	0.0061436	2.03603	0.667676	39.483	0.801429	38.8228	1.16152	NA	NA	39.464	0.801	*	-1.72	rev discord.	S	YC2σ
Spot 116	433.762	467.429	16504.8	3.02775	19.9398	2.21064	0.0414802	2.45646	0.0061484	1.05209	0.428295	39.5138	0.414448	41.2682	0.993411	144.466	52.0872	39.503	0.414	*	4.43	discord.	S	YC2σ
Spot 210	961.973	1060	60890.9	2.30607	20.9155	1.85632	0.0401221	2.32468	0.0061534	1.39903	0.601818	39.5458	0.551566	39.9432	0.910524	63.89	44.2114	39.547	0.552	*	1.02	concordant	P	high eU
Spot 305	1508.8	1685.26	50628.8	2.00938	20.9046	1.26874	0.0402219	1.75137	0.00616276	1.20617	0.6887	39.6058	0.476247	40.0407	0.687613	66.1651	30.2499	39.608	0.476	*	1.11	concordant	P	high eU
Spot 309	1397.12	1578.58	73350.1	1.80927	20.9427	1.29797	0.0402981	2.15116	0.00617401	1.71506	0.797275	39.6779	0.67841	40.1151	0.846114	66.3399	30.9107	39.682	0.679	*	1.12	concordant	P	high eU
Spot 82	853.653	951.809	13727	2.04378	20.6239	1.65677	0.0402677	2.132	0.00619315	1.33817	0.62766	39.8005	0.530959	40.0854	0.837972	57.1506	39.58	39.802	0.531	*	0.727	concordant	S	YC2σ
Spot 114	549.746	606.204	27382.4	2.28823	19.8877	2.08097	0.0422514	2.56263	0.00620148	1.49456	0.583214	39.8539	0.593804	42.0198	1.05484	167.468	48.6115	39.814	0.594	*	5.4	discord.	D	does not overlap concordia within 2σ
Spot 128	1370.98	1738.72	13177.4	0.876103	21.1069	1.45491	0.0393126	1.90188	0.0061985	1.15062	0.604993	39.8348	0.456934	39.1527	0.730463	NA	NA	39.821	0.457	*	-1.76	rev discord.	S	YC2σ
Spot 241	767.199	834.305	18319.7	2.6867	20.7113	1.93276	0.0405172	2.54529	0.00622385	1.63681	0.643075	39.9972	0.652653	40.3289	1.00637	60.1085	46.473	39.999	0.653	*	0.842	concordant	S	YC2σ
Spot 242	1105.63	1175.91	87926.3	3.69715	21.0611	1.72542	0.0403784	2.14879	0.006224	1.28068	0.596001	39.9981	0.510664	40.1934	0.846804	51.8485	41.1645	39.999	0.511	*	0.497	concordant	P	high eU
Spot 184	1014.96	1174.06	12503	1.49924	21.3003	1.4272	0.0391691	1.88554	0.00623585	1.21121	0.642367	40.074	0.483874	39.0125	0.721644	NA	NA	40.039	0.483	*	-2.74	rev discord.	S	YC2σ
Spot 3	1591.33	1811.6	22969.8	1.69768	21.1211	1.09102	0.0400427	1.68673	0.00623685	1.20339	0.713447	40.0805	0.480828	39.8657	0.659397	26.935	NA	40.075	0.481	*	-0.548	concordant	P	high eU
Spot 234	759.257	801.361	24992.2	4.23779	20.2426	1.68596	0.0417193	2.17972	0.00624101	1.38053	0.63335	40.1071	0.55197	41.5012	0.886374	122.832	39.7353	40.09	0.552	*	3.49	concordant	S	YC2σ
Spot 4	1883.45	2145.8	32822.7	1.68709	20.7145	1.29342	0.0410533	1.8093	0.00624406	1.19736	0.661779	40.1267	0.478969	40.8519	0.724464	83.6367	32.1832	40.126	0.479	*	1.83	concordant	P	high eU
Spot 172	494.964	529.755	4942.59	3.34335	20.8434	2.50036	0.0386555	2.71915	0.00624924	0.954756	0.351124	40.1599	0.382237	38.5105	1.02755	NA	NA	40.145	0.382	*	-4.28	rev discord.	S	YC2σ
Spot 81	1514.2	1616.99	27192.6	3.46185	21.018	1.39816	0.0404104	1.94219	0.00626486	1.31129	0.675163	40.2599	0.52628	40.2246	0.765966	38.0981	34.31	40.259	0.526	*	-0.0893	concordant	P	high eU
Spot 187	476.392	507.792	40702.3	3.56537	20.7162	1.97792	0.041235	2.26539	0.00627166	1.05958	0.467724	40.3035	0.425715	41.0291	0.910943	83.6491	47.5207	40.303	0.426	*	1.82	concordant	S	YC2σ
Spot 246	1272.12	1440.21	71577.4	1.77852	19.2962	1.6079	0.0446514	2.00567	0.0063032	1.19356	0.595093	40.5055	0.481943	44.3552	0.870469	257.777	37.0429	40.362	0.482	*	9.28	discord.	D	does not overlap concordia within 2σ
Spot 152	1258.03	1364.55	15599.1	2.7755	19.6663	1.37148	0.0431274	1.9506	0.00629873	1.38474	0.709904	40.4769	0.558742	42.8728	0.818867	179.045	32.028	40.381	0.559	*	5.88	discord.	D	does not overlap concordia within 2σ
Spot 115	984.258	1123.78	39453.4	1.65784	19.9899	1.54644	0.0427916	1.8906	0.0062925	1.08598	0.574411	40.4369	0.437764	42.546	0.787756	163.111	36.1792	40.402	0.438	*	5.19	discord.	D	does not overlap concordia within 2σ
Spot 103	585.327	640.22	43179.4	2.50583	21.1627	1.96363	0.0404185	2.41551	0.00629066	1.40646	0.582263	40.4252	0.566787	40.2326	0.952822	28.7562	NA	40.423	0.567	*	-0.487	concordant	S	YC2σ
Spot 255	1043.41	1372.26	48705.5	0.745623	20.4644	1.27454	0.0419434	1.72527	0.0062977	1.16071	0.672771	40.4703	0.468271	41.7197	0.70519	114.178	30.1153	40.456	0.468	*	3.1	concordant	P	high eU
Spot 162	444.954	523.713	5739.85	1.32766	20.4612	2.5214	0.0400279	2.86405	0.00629885	1.18793	0.414774	40.4776	0.479341	39.8513	1.11925	2.27909	NA	40.473	0.479	*	-1.59	concordant	S	YC2σ
Spot 142	957.637	1078.59	14109.8	1.86067	20.6545	1.44046	0.0409599	1.92222	0.0062987	1.27102	0.661223	40.4767	0.512855	40.7608	0.767997	57.4972	34.3808	40.479	0.513	*	0.714	concordant	P	high eU
Spot 188	479.832	518.124	3689.07	2.94478	20.874	2.30542	0.0380665	5.66938	0.00632071	2.39103	0.421745	40.6177	0.968129	37.9345	2.11098	NA	NA	40.561	0.967	*	-6.97	rev discord.	S	YC2σ
Spot 183	772.448	902.585	13346.6	1.39489	21.2275	1.73539	0.0399141	2.19405	0.00631561	1.28639	0.586309	40.585	0.520442	39.7402	0.855078	NA	NA	40.567	0.52	*	-2.15	rev discord.	S	YC2σ
Spot 293	647.305	700.396	44013.5	2.86515	21.2674	1.76637	0.040486	2.15468	0.00632067	1.23032	0.570998	40.6174	0.498154	40.2985	0.8513	21.3609	NA	40.613	0.498	*	-0.804	concordant	S	YC2σ
Spot 182	1579.16	1748.6	112009	2.19008	20.8092	1.08389	0.041628	1.57275	0.00632236	1.13961	0.7246	40.6283	0.46155	41.4122	0.638208	87.0945	25.6787	40.626	0.462	*	1.95	concordant	P	high eU
Spot 233	1337.05	1376.42	61452.6	7.98237	20.8507	1.5279	0.0413509	2.03181	0.00632258	1.32986	0.654523	40.6296	0.53862	41.1421	0.81922	71.1501	36.5254	40.631	0.539	*	1.28	concordant	P	high eU
Spot 76	830.93	907.236	46287.5	2.559	20.6379	1.74903	0.0417601	2.14315	0.00632498	1.23827	0.577782	40.645	0.501714	41.541	0.872321	93.6217	41.4328	40.643	0.502	*	2.22	concordant	P	high eU
Spot 186	1211.11	1365.44	78728.8	1.84418	21.1257	1.34077	0.0409282	1.69766	0.00632543	1.03603	0.610269	40.6479	0.419798	40.7299	0.677769	45.5644	32.1191	40.649	0.42	*	0.206	concordant	P	high eU
Spot 117	626.667	676.597	9376.88	2.94943	20.4878	2.31029	0.040967	2.74792	0.00633257	1.48492	0.540379	40.6936	0.602365	40.7677	1.09808	45.1067	NA	40.694	0.602	*	0.186	concordant	S	YC2σ
Spot 126	635.117	688.658	26832.5	2.78767	20.0805	1.88239	0.0428542	2.34186	0.00634308	1.3907	0.593843	40.761	0.565074	42.6068	0.97715	147.818	44.1939	40.734	0.565	*	4.52	discord.	D	does not overlap concordia within 2σ
Spot 120	1868.71	1986.45	35385.4	3.72988	20.4347	1.55086	0.0421758	2.34706	0.00634329	1.75892	0.749415	40.7623	0.714714	41.9461	0.964441	110.184	36.6834	40.744	0.715	*	2.92	concordant	P	high eU
Spot 84	2386.7	2593.93	38161	2.70658	19.0822	1.76913	0.0453751	2.06111	0.00636	1.05323	0.511004	40.8694	0.429088	45.0584	0.908396	274.086	40.5933	40.761	0.429	*	9.97	discord.	P	high eU
Spot 159	482.44	525.405	13416.6	2.63875	20.0365	2.15372	0.042523	2.51769	0.00634679	1.10064	0.437164	40.7848	0.447477	42.2843	1.04272	128.232	53.2895	40.778	0.448	*	3.69	discord.	S
Spot 302	603.194	672.123	7539.29	2.05648	20.5217	2.27109	0.0407903	2.78956	0.00635455	1.05298	0.37747	40.8344	0.428618	40.5953	1.11009	26.4996	NA	40.834	0.429	*	-0.599	concordant	S
Spot 121	478.531	521.542	12936.6	2.61453	21.3453	1.64846	0.0398239	2.25105	0.00635851	0.883254	0.392374	40.8598	0.359754	39.6521	0.875386	NA	NA	40.849	0.36	*	-3.06	rev discord.	S
Spot 193	1775.12	2045.79	17251.7	1.54118	21.3753	1.2238	0.0401206	1.64262	0.00636438	1.0831	0.659371	40.8974	0.441558	39.9418	0.643357	NA	NA	40.865	0.441	*	-2.41	rev discord.	P	high eU
Spot 43	1358.82	1517.8	108084	2.00857	19.943	1.15958	0.0436985	1.47425	0.00637259	0.910319	0.61748	40.95	0.371594	43.4286	0.626747	182.538	27.0164	40.888	0.372	*	6	discord.	P	high eU
Spot 282	981.086	989.897	14407.7	26.1674	21.5421	1.69931	0.0396674	2.32429	0.00637126	1.10947	0.477336	40.9415	0.452792	39.4992	0.900448	NA	NA	40.917	0.453	*	-3.66	rev discord.	M	high U/Th
Spot 248	695.251	741.391	6846.25	3.54106	19.9596	2.70583	0.0419209	3.88044	0.00637298	1.63268	0.420746	40.9525	0.666504	41.6978	1.58529	84.7673	83.5204	40.952	0.667	*	1.84	concordant	S	YC2σ
Spot 135	1074.17	1330.65	173557	0.984215	18.9845	2.16326	0.0461756	2.51686	0.00640406	1.28642	0.511121	41.1516	0.527696	45.8356	1.12797	298.288	49.3433	41.017	0.527	*	11	discord.	P	high eU
Spot 163	800.529	897.12	8784.68	1.94762	20.6203	1.97212	0.0410639	2.36444	0.00638585	1.19564	0.505676	41.035	0.489073	40.8622	0.946981	30.7192	NA	41.034	0.489	*	-0.43	concordant	S
Spot 311	417.111	447.082	17319.4	3.27052	20.2244	2.43826	0.0426248	2.82639	0.00638721	1.31133	0.46396	41.0436	0.536509	42.3835	1.17327	118.867	59.0108	41.038	0.537	*	3.28	concordant	S
Spot 258	1452.83	1672.66	14773.3	1.55312	19.2659	3.34466	0.0446329	3.53684	0.00639417	1.14707	0.324322	41.0882	0.469814	44.3373	1.5344	223.822	77.377	41.067	0.47	*	7.77	discord.	P	high eU
Spot 137	1046.38	1220.43	27767.1	1.41283	20.7273	1.39626	0.0418211	1.85735	0.0063929	1.09061	0.587185	41.0801	0.446599	41.6005	0.757054	71.7409	35.777	41.081	0.447	*	1.28	concordant	P	high eU
Spot 175	879.087	980.087	18922.9	2.04541	20.5189	1.67186	0.0422069	2.17629	0.0063935	1.34752	0.619182	41.0839	0.551855	41.9764	0.894905	93.2648	40.4635	41.081	0.552	*	2.19	concordant	S
Spot 96	526.152	589.911	4151.2	1.93926	20.8427	2.03785	0.0389103	2.76116	0.00639678	0.889619	0.322191	41.105	0.364514	38.7596	1.05004	NA	NA	41.082	0.364	*	-5.99	rev discord.	D	does not overlap concordia within 2σ
Spot 231	497.671	559.241	5350.86	1.8995	20.124	2.0539	0.0411449	2.48268	0.00639676	1.11192	0.44787	41.1048	0.455598	40.9412	0.996222	31.3882	NA	41.104	0.456	*	-0.407	concordant	S
Spot 112	429.804	463.5	10569.9	2.99742	20.364	2.06744	0.041816	2.36083	0.00639842	1.13002	0.478653	41.1155	0.463134	41.5956	0.962161	69.3524	49.3068	41.116	0.463	*	1.18	concordant	S
Spot 196	666.514	745.996	16494.1	1.97063	20.6891	1.7376	0.0416899	2.34126	0.00640159	1.25308	0.535214	41.1358	0.513821	41.4726	0.951419	60.9795	47.126	41.137	0.514	*	0.832	concordant	S
Spot 166	944.627	1090.03	69953	1.52675	20.6405	1.77266	0.0425044	2.0602	0.00640777	1.04211	0.505832	41.1753	0.427727	42.2662	0.852894	104.627	42.0262	41.172	0.428	*	2.67	concordant	P	high eU
Spot 205	1262.62	1378.23	13885.9	2.56648	21.4978	1.56296	0.0400057	2.17531	0.00642591	1.09565	0.503677	41.2916	0.450966	39.8296	0.849644	NA	NA	41.263	0.451	*	-3.68	rev discord.	P	high eU
Spot 6	916.894	993.433	35200.5	2.81517	20.8924	1.5555	0.0418368	1.84735	0.00642306	0.991877	0.536919	41.2733	0.408072	41.6158	0.753248	61.4321	37.1371	41.274	0.408	*	0.843	concordant	S
Spot 314	478.883	518.103	191738	2.86936	21.4496	2.34297	0.0410635	2.61446	0.00642423	1.16013	0.443735	41.2808	0.477379	40.8618	1.04711	16.324	NA	41.278	0.477	*	-1.04	concordant	S
Spot 312	622.775	684.462	15603.3	2.37251	20.8178	1.78881	0.041572	2.25556	0.00642854	1.11428	0.494014	41.3084	0.458819	41.3577	0.914106	44.2118	NA	41.309	0.459	*	0.122	concordant	S
Spot 218	742.389	838.251	7371.91	1.81992	19.2396	2.16914	0.0440958	2.61186	0.00643405	1.22973	0.470826	41.3437	0.506789	43.815	1.12005	181.26	53.7002	41.316	0.507	*	5.93	discord.	D	does not overlap concordia within 2σ
Spot 244	1403.95	1617.93	166092	1.54182	21.5486	1.55347	0.0408841	1.91917	0.00643756	1.12665	0.587048	41.3662	0.464558	40.6869	0.765414	0.806614	NA	41.353	0.464	*	-1.69	concordant	P	high eU
Spot 100	534.089	570.302	4051.13	3.46595	22.301	1.79288	0.0364312	2.67471	0.00645683	0.870655	0.325513	41.4896	0.360071	36.3337	0.954642	NA	NA	41.373	0.359	*	-13.5	rev discord.	D	does not overlap concordia within 2σ
Spot 28	964.141	1056.27	39556.5	2.45935	20.2631	1.30932	0.0433392	1.83753	0.00645035	1.28049	0.696854	41.4481	0.529036	43.0789	0.775032	134.846	30.9671	41.415	0.529	*	3.94	discord.	P	high eU
Spot 266	487.179	521.044	7980.7	3.3807	20.5288	1.70906	0.0414004	2.07574	0.00644803	1.1431	0.550696	41.4332	0.472104	41.1904	0.837894	27.0435	NA	41.431	0.472	*	-0.6	concordant	S
Spot 139	638.712	667.395	121106	5.23296	21.2108	2.11016	0.0416432	2.51847	0.00645076	1.37472	0.545857	41.4507	0.568004	41.4271	1.02233	40.0843	NA	41.451	0.568	*	-0.0581	concordant	S
Spot 211	2279.51	2718.42	47255.8	1.22049	21.3605	1.33818	0.0412078	2.1664	0.00646486	1.68622	0.77835	41.541	0.698219	41.0026	0.870584	9.63085	NA	41.515	0.697	*	-1.33	concordant	P	high eU
Spot 291	1412.79	1701.04	48191.5	1.15181	17.6761	2.63017	0.050172	2.92096	0.00649846	1.26587	0.433374	41.7562	0.52687	49.707	1.41695	452.15	58.472	41.524	0.526	*	17.8	discord.	P	high eU
Spot 50	796.619	881.459	14150.1	2.20658	21.0039	1.5461	0.0412557	2.01802	0.0064677	1.23867	0.613805	41.5592	0.513127	41.0493	0.811863	11.3286	NA	41.55	0.513	*	-1.26	concordant	S
Spot 243	753.273	866.214	10859	1.56736	19.821	1.73486	0.0435659	2.16282	0.00647187	1.17273	0.542222	41.5859	0.486121	43.2996	0.916807	139.28	42.6781	41.569	0.486	*	4.12	discord.	S
Spot 222	467.521	527.971	5690.71	1.8175	20.3969	2.21536	0.0412504	2.51305	0.00647981	1.00261	0.39896	41.6368	0.416109	41.0442	1.01089	6.53898	NA	41.633	0.416	*	-1.46	concordant	S
Spot 278	544.037	589.15	12967.8	2.83396	20.2654	2.68404	0.0428265	3.05987	0.00648113	1.25583	0.41042	41.6452	0.521307	42.5799	1.27595	95.5834	66.0653	41.644	0.521	*	2.27	concordant	S
Spot 64	639.377	689.377	127799	3.00505	20.5389	1.61036	0.0432697	2.10743	0.00649597	1.35933	0.64502	41.7403	0.565557	43.0113	0.887504	114.461	38.0079	41.728	0.566	*	3.06	concordant	S
Spot 39	1569.96	1888.75	25542.9	1.15733	19.3977	1.39628	0.0457371	2.16122	0.00653735	1.64887	0.762935	42.0053	0.69036	45.4099	0.959785	229.091	32.2828	41.736	0.69	*	8	discord.	P	high eU
Spot 55	1180.62	1442.21	11307.5	1.06061	15.6309	3.27487	0.0561552	3.43283	0.00653199	1.01408	0.295405	41.971	0.424235	55.4756	1.8533	686.187	70.0155	41.738	0.423	*	28.6	discord.	P	high eU
Spot 122	742.058	842.999	384059	1.72757	20.4234	1.47317	0.0436332	1.96137	0.00650243	1.2949	0.660199	41.7817	0.539279	43.3651	0.832644	131.842	34.644	41.757	0.539	*	3.8	discord.	D	does not overlap concordia within 2σ
Spot 41	832.673	959.865	32256.4	1.53844	20.8834	1.83271	0.0423944	2.34509	0.0065187	1.46184	0.623363	41.8859	0.61032	42.1591	0.968424	57.7128	43.7312	41.888	0.61	*	0.664	concordant	S
Spot 310	380.673	418.458	10391.4	2.36758	21.2617	2.69802	0.0408938	2.91091	0.00652896	1.07745	0.370141	41.9516	0.450538	40.6963	1.16121	NA	NA	41.941	0.45	*	-3.1	rev discord.	S
Spot 299	229.499	243.574	29739.4	3.83182	21.0311	2.9541	0.0421605	3.21844	0.00652981	1.21805	0.37846	41.957	0.509398	41.9312	1.32204	40.4762	NA	41.957	0.509	*	-0.0629	concordant	S
Spot 247	549.055	617.552	18723.4	1.8837	20.102	2.07789	0.0438841	2.44865	0.00653138	1.1798	0.481816	41.9671	0.493518	43.6091	1.04523	134.885	50.4343	41.957	0.494	*	3.92	discord.	P	high U/Th
Spot 273	524.639	567.767	13977	2.85871	19.9673	2.28709	0.0438427	2.46307	0.00653113	0.865875	0.351543	41.9655	0.362188	43.5689	1.05043	132.781	54.2206	41.961	0.362	*	3.83	discord.
Spot 13	1030.68	1116.17	98571.4	2.83305	20.7899	1.16212	0.0430442	1.48863	0.006533	0.928342	0.623624	41.9775	0.388428	42.7919	0.623774	88.7117	27.57	41.976	0.389	*	1.96	concordant
Spot 51	534.583	565.641	43108.2	4.04503	20.6611	1.98039	0.0430245	2.54254	0.00653342	1.58778	0.624485	41.9801	0.664386	42.7727	1.06493	87.4734	47.0841	41.979	0.665	*	1.91	concordant
Spot 65	643.763	719.36	18070.5	2.0012	19.6988	1.82146	0.0449799	2.40718	0.00657222	1.34565	0.559016	42.2286	0.566393	44.6745	1.05208	178.007	46.5323	42.187	0.566	*	5.75	discord.
Spot 177	342.047	391.924	5724.13	1.6116	21.4231	2.3994	0.0399329	2.87006	0.00657982	1.21715	0.424087	42.2773	0.512896	39.7586	1.11904	NA	NA	42.227	0.512	*	-6.27	rev discord.
Spot 138	4033.62	4533.46	94194.5	1.89641	21.2891	0.769575	0.0422552	1.26886	0.00658306	1.00597	0.792808	42.2981	0.424111	42.0235	0.522337	26.3697	18.5478	42.286	0.424	*	-0.665	concordant
Spot 256	709.361	810.854	20124.2	1.64247	21.4562	1.90567	0.0414463	2.38154	0.00658817	1.38571	0.581855	42.3308	0.58466	41.2351	0.962358	NA	NA	42.304	0.584	*	-2.68	rev discord.
Spot 254	601.638	638.627	23539.9	3.82243	20.8222	1.60086	0.0428572	2.22936	0.00658623	1.49054	0.668595	42.3183	0.628706	42.6098	0.930272	59.0733	39.506	42.321	0.629	*	0.701	concordant
Spot 52	502.365	552.738	11388.7	2.34362	15.2711	2.95413	0.0582442	3.21376	0.00661934	0.789033	0.245517	42.5304	0.334474	57.482	1.79602	735.593	65.9733	42.349	0.334	*	30.9	discord.
Spot 16	907.461	1030.87	13681.1	1.72801	17.5059	2.90626	0.0509517	3.18214	0.00662355	1.28971	0.405298	42.5574	0.547061	50.4606	1.56648	444.051	64.7029	42.365	0.546	*	17.4	discord.
Spot 180	378.158	391.653	12172.8	6.58541	21.2261	2.35434	0.041588	2.55135	0.00659539	0.961496	0.376858	42.377	0.406117	41.3733	1.03436	NA	NA	42.37	0.406	*	-2.45	rev discord.
Spot 20	661.101	732.454	33702.3	2.17735	20.042	1.78735	0.0448707	2.26942	0.0066127	1.39122	0.61303	42.4879	0.589158	44.5683	0.989567	158.014	41.9818	42.45	0.589	*	4.89	discord.
Spot 131	912.503	964.659	23635.2	4.11146	21.9343	2.02469	0.0408542	2.8687	0.00662867	2.0312	0.708058	42.5902	0.862242	40.6577	1.1433	NA	NA	42.452	0.86	*	-4.74	rev discord.
Spot 230	693.419	793.877	174917	1.6221	18.907	1.97958	0.048069	2.3504	0.0066415	1.26692	0.539025	42.6723	0.53884	47.6717	1.09458	306.941	45.1191	42.503	0.538	*	11.3	discord.
Spot 21	668.742	765.624	57732.4	1.62213	20.755	1.99119	0.043731	2.36502	0.00665082	1.27427	0.5388	42.732	0.542721	43.4602	1.00616	83.8183	47.2916	42.732	0.543		1.73	concordant
Spot 272	596.166	691.77	56132.3	1.4654	21.2639	2.06706	0.0428301	2.51251	0.00668618	1.42769	0.56823	42.9584	0.611272	42.5834	1.04779	21.5243	NA	42.953	0.611		-0.895	concordant
Spot 294	1332.95	1683.6	37754.8	0.893321	20.6958	2.26074	0.0439635	3.05822	0.00668548	2.05899	0.673265	42.9539	0.881478	43.6864	1.30769	84.0635	53.649	42.954	0.882		1.73	concordant
Spot 171	901.36	1164.56	66613.1	0.804774	20.6305	1.32018	0.0444595	1.75437	0.00670019	1.14845	0.65462	43.0481	0.492738	44.1687	0.758272	105.427	31.3501	43.041	0.493		2.63	concordant
Spot 149	310.888	353.828	6735.49	1.7014	21.4259	2.52648	0.0409161	2.66503	0.00670586	0.812968	0.30505	43.0844	0.349095	40.7181	1.06368	NA	NA	43.064	0.349		-5.77	rev discord.
Spot 268	558.837	637.184	7981.81	1.6762	20.1766	2.24984	0.0438437	3.17906	0.00671007	1.13011	0.355485	43.1114	0.48558	43.5699	1.35582	68.8858	NA	43.112	0.486		1.08	concordant
Spot 66	795.778	950.546	11938.6	1.20831	21.2127	2.26396	0.0423944	2.76217	0.0067407	1.5762	0.570636	43.3075	0.680324	42.1591	1.14066	NA	NA	43.281	0.68		-2.74	rev discord.
Spot 25	561.112	619.932	28886.5	2.24181	20.6988	1.89429	0.0442446	2.33305	0.00674727	1.30472	0.559234	43.3496	0.563695	43.9597	1.00372	77.355	45.9294	43.351	0.564		1.43	concordant
Spot 202	777.529	899.867	25436.9	1.49357	20.5777	1.1342	0.044433	1.80664	0.00674995	1.40261	0.776364	43.3668	0.606225	44.143	0.780417	86.5456	26.9908	43.367	0.607		1.81	concordant
Spot 58	443.707	511.88	4094.33	1.52949	16.9277	4.16455	0.0517588	4.38102	0.00680511	1.35786	0.309942	43.7199	0.591648	51.2401	2.18914	418.814	93.053	43.627	0.591		16.3	discord.
Spot 200	789.464	891.293	26847.4	1.82191	21.1631	1.7493	0.0436666	2.12374	0.00682024	1.18477	0.557868	43.8168	0.517368	43.3975	0.902235	20.2794	NA	43.811	0.517		-0.982	concordant
Spot 79	277.861	302.585	4353.49	2.64096	21.0385	3.05634	0.0413844	3.6292	0.00683694	1.55519	0.42852	43.9238	0.680774	41.1747	1.46442	NA	NA	43.865	0.68		-6.6	rev discord.
Spot 226	156.294	164.085	3438.63	4.71424	21.4638	3.1828	0.03969	3.72193	0.00685459	1.51728	0.407659	44.0368	0.665884	39.5214	1.4427	NA	NA	43.897	0.664		-11	rev discord.
Spot 296	943.981	1036.29	41836.6	2.40325	20.8994	1.62562	0.0445612	2.1135	0.00683718	1.34826	0.637929	43.9253	0.590215	44.2675	0.915493	62.8261	38.7728	43.928	0.59		0.793	concordant
Spot 95	459.245	547.344	25196.3	1.22502	21.2826	2.18195	0.0435728	2.38906	0.00684982	0.954992	0.399736	44.0062	0.418825	43.3063	1.01286	4.70905	NA	44.001	0.419		-1.64	concordant
Spot 130	294.282	346.283	63138	1.3299	20.5189	2.70238	0.0455527	2.99689	0.00685186	1.29555	0.432298	44.0193	0.56835	45.2309	1.32577	109.945	63.8073	44.017	0.568		2.78	concordant
Spot 227	766.043	896.873	571985	1.37599	21.094	1.68978	0.0448995	1.99281	0.0069172	1.05638	0.530096	44.4376	0.467817	44.5964	0.869488	53.1208	40.3134	44.439	0.468		0.364	concordant
Spot 185	575.594	754.777	4586.88	0.754894	20.8437	1.6419	0.0425111	1.8924	0.00692292	0.750087	0.396368	44.4743	0.332447	42.2727	0.783546	NA	NA	44.442	0.332		-5.19	rev discord.
Spot 284	378.658	421.335	4095.64	2.08507	12.2561	9.07937	0.0746261	9.17567	0.00695967	1.24298	0.135464	44.7095	0.553806	73.0799	6.47004	1140.95	181.112	44.582	0.553		50.6	discord.
Spot 108	366.697	418.525	4755.01	1.66271	20.4091	2.04853	0.04363	4.08093	0.00694928	0.953142	0.23356	44.643	0.424041	43.362	1.73232	NA	NA	44.639	0.424		-2.97	rev discord.
Spot 22	777.147	847.947	11075.6	2.57953	20.0431	1.62258	0.0464083	2.1361	0.00696569	1.29968	0.608436	44.748	0.579567	46.0614	0.961933	115.005	40.0141	44.74	0.58		2.96	concordant
Spot 221	731.488	868.759	18422.9	1.25227	21.0533	1.85919	0.0447876	2.27236	0.00699506	1.28088	0.56368	44.9361	0.573576	44.4876	0.989092	20.395	NA	44.93	0.573		-1.03	concordant
Spot 92	279.004	308.258	4869.89	2.24127	8.08668	10.4561	0.118663	10.6914	0.00715422	2.05981	0.192661	45.9549	0.943216	113.86	11.5159	1960.61	187.763	45.315	0.937		94.2	discord.
Spot 147	190.933	224.778	7062.59	1.32574	19.9719	2.72726	0.046522	3.02348	0.00705885	1.28319	0.42441	45.3444	0.579815	46.1718	1.36473	89.3757	64.8985	45.344	0.58		1.85	concordant
Spot 249	401.193	474.058	13340.5	1.2939	21.0479	2.20803	0.0449953	2.54694	0.00706781	1.23084	0.483264	45.4018	0.556861	44.6895	1.11353	6.62315	NA	45.394	0.557		-1.62	concordant
Spot 24	416.704	551.075	20570.1	0.728771	20.3612	2.38517	0.0469327	2.63493	0.0070684	1.11834	0.424427	45.4056	0.506002	46.5702	1.19938	106.977	56.3696	45.404	0.506		2.59	concordant
Spot 232	480.543	564.55	16122.7	1.34426	13.451	8.02321	0.0714952	8.17115	0.00710115	1.42538	0.17444	45.6152	0.647892	70.1173	5.5361	1014.51	163.308	45.44	0.647		44.2	discord.
Spot 127	450.925	530.679	18937.5	1.32868	16.3526	4.56153	0.0589587	4.75918	0.00712123	1.2567	0.264059	45.7437	0.572828	58.1673	2.6905	605.248	99.3264	45.592	0.572		24.7	discord.
Spot 212	357.158	439.611	74828.2	1.01795	19.7979	2.39584	0.0490474	2.71704	0.00711188	1.28142	0.471625	45.6839	0.583333	48.6191	1.28987	195.872	55.6878	45.649	0.583		6.37	discord.
Spot 207	485.906	583.999	14429.3	1.16407	21.4302	1.73931	0.0445153	2.10071	0.00712094	1.17393	0.558827	45.7419	0.535078	44.2229	0.909053	NA	NA	45.702	0.535		-3.45	rev discord.
Spot 133	387.315	458.706	11403.8	1.27495	20.9476	1.77074	0.0455079	2.07342	0.00715147	1.06662	0.514424	45.9373	0.488234	45.1874	0.916385	5.5572	NA	45.927	0.488		-1.68	concordant
Spot 98	511.854	582.229	38810.7	1.70923	19.4602	2.08948	0.0501278	2.52962	0.00717002	1.42384	0.562866	46.056	0.653426	49.6643	1.22609	227.469	48.3397	45.967	0.653		7.73	discord.
Spot 304	557.304	686.497	26954.2	1.01373	20.4637	1.79398	0.0476486	2.0462	0.00718462	0.975404	0.47669	46.1495	0.448536	47.2643	0.944958	104.213	42.5329	46.148	0.449		2.44	concordant
Spot 174	1306.8	1565.6	18987.4	1.18659	20.6583	1.4205	0.0472484	1.86137	0.00720623	1.01595	0.545807	46.2878	0.468576	46.8764	0.852709	77.0652	37.0538	46.289	0.469		1.29	concordant
Spot 313	861.536	955.847	287344	2.14674	19.9338	1.92942	0.049643	2.16096	0.00721306	0.973189	0.45035	46.3314	0.449276	49.1954	1.03775	191.092	44.8801	46.303	0.449		6.14	discord.
Spot 10	416.214	484.031	25835.4	1.44229	21.2026	2.36225	0.046259	2.5978	0.00722568	0.889259	0.342313	46.4122	0.411243	45.9166	1.16625	20.1238	NA	46.41	0.411		-1.1	concordant
Spot 239	592.199	636.504	146031	3.1411	21.2284	2.32408	0.0466798	2.6087	0.00725137	1.18437	0.45401	46.5767	0.549654	46.3249	1.18132	33.3346	NA	46.575	0.55		-0.554	concordant
Spot 215	493.468	598.157	12926.7	1.10771	9.55006	10.0962	0.103996	10.1751	0.00730674	1.26394	0.124219	46.931	0.591026	100.459	9.73266	1682.92	186.878	46.718	0.59		78.8	discord.
Spot 85	106.607	118.829	3300.85	2.04973	20.7006	3.81276	0.0438123	4.38049	0.00729141	1.18899	0.271429	46.8329	0.554823	43.5393	1.86693	NA	NA	46.805	0.555		-7.45	rev discord.
Spot 192	209.5	236.761	3845.09	1.80598	20.9473	2.87867	0.0440691	3.20946	0.00731656	1.18319	0.368658	46.9939	0.554006	43.7891	1.37552	NA	NA	46.941	0.553		-7.22	rev discord.
Spot 223	595.977	690.262	8894.91	1.48545	22.0835	2.23685	0.0442113	2.66883	0.00739283	1.41853	0.531517	47.4819	0.671072	43.9274	1.14735	NA	NA	47.322	0.669		-7.96	rev discord.
Spot 190	135.485	165.088	9776.18	1.07556	15.7845	4.53605	0.0628041	4.68386	0.00739514	1.16146	0.24797	47.4968	0.549627	61.8477	2.81041	660.058	97.3115	47.333	0.549		27.1	discord.
Spot 72	1197.72	1389.66	111992	1.46636	20.4757	1.33004	0.0492645	1.74895	0.00737634	1.13508	0.649006	47.3764	0.535787	48.8292	0.833788	120.727	31.3319	47.365	0.536		3.09	concordant
Spot 17	139.931	171.761	65088	1.0331	20.6625	3.65863	0.0487793	4.62086	0.00737921	2.82244	0.610804	47.3948	1.33278	48.3596	2.18225	96.4413	86.6292	47.394	1.333		2.06	concordant
Spot 265	654.538	740.512	67064.2	1.78912	21.1367	1.92082	0.0477208	2.31267	0.00739594	1.28783	0.556857	47.5019	0.609494	47.3343	1.06956	38.8302	NA	47.5	0.609		-0.362	concordant
Spot 32	368.875	437.286	15431.9	1.26712	20.5162	2.41587	0.0486202	2.73558	0.00741438	1.19624	0.437289	47.6198	0.567547	48.2055	1.28789	77.4069	58.4252	47.621	0.568		1.25	concordant
Spot 191	554.918	615.146	41393.1	2.16518	19.0358	2.44117	0.0532973	2.75411	0.00744145	1.27508	0.462973	47.7931	0.607145	52.7243	1.41503	283.028	55.8696	47.696	0.607		10.1	discord.
Spot 217	41.8038	65.6205	14371	0.412481	19.6094	5.87803	0.0513414	6.24093	0.00748206	2.09308	0.33538	48.0529	1.00205	50.837	3.0946	184.123	137.015	48.04	1.002		5.77	discord.
Spot 48	230.907	265.557	8430.14	1.56603	19.4585	3.97637	0.051027	4.24545	0.00749934	1.48019	0.348652	48.1635	0.710252	50.5334	2.09286	164.409	93.0369	48.154	0.71		4.92	discord.
Spot 75	445.557	513.625	62921.6	1.53826	21.1821	1.9689	0.048663	2.2632	0.00755492	1.11599	0.493101	48.5191	0.539435	48.2469	1.06639	34.7437	NA	48.517	0.539		-0.576	concordant
Spot 8	445.265	558.06	5666.39	0.927677	19.5042	2.77746	0.0556967	3.12258	0.00833586	1.41135	0.451984	53.5137	0.752141	55.0347	1.67276	121.749	65.6214	53.511	0.752		2.88	concordant
Spot 113	2762.67	2784.22	72041.5	30.1312	21.0717	1.08001	0.0728817	1.65531	0.0112598	1.25391	0.757513	72.1797	0.900023	71.4303	1.14176	46.4188	25.8256	72.136	0.899		-1.08	concordant
Spot 201	117.503	139.85	9493.91	1.23564	18.7693	3.19822	0.0818746	3.71344	0.0115445	1.40421	0.378143	73.9942	1.03309	79.9059	2.85351	260.462	79.0036	73.949	1.033		7.98	discord.
Spot 181	7808.47	8078.26	325431	6.80158	20.618	0.616412	0.0787221	1.39672	0.0118248	1.25331	0.897324	75.7805	0.944207	76.9428	1.03497	113.181	14.5703	75.857	0.946		1.58	concordant
Spot 238	658.33	754.725	17725.9	1.60494	20.6703	1.53845	0.0794423	2.01796	0.0122006	1.2939	0.64119	78.1741	1.00538	77.6205	1.50798	60.605	36.9183	78.158	1.005		-0.738	concordant
Spot 125	1238.44	1410.1	131649	1.69544	21.0018	1.01604	0.0811369	1.62074	0.0124513	1.26192	0.77861	79.7705	1.00044	79.2132	1.23504	62.4399	24.251	79.734	0.999		-0.729	concordant
Spot 94	571.162	593.663	47617.3	5.96523	20.8487	1.60984	0.0825491	1.84039	0.0126354	0.891339	0.48432	80.9424	0.716961	80.5387	1.42497	68.5667	38.333	80.937	0.717		-0.52	concordant
Spot 308	1798.27	2086.5	84735.7	1.46613	20.9296	0.850302	0.0831078	1.2964	0.0127175	0.978473	0.754762	81.4654	0.792102	81.0626	1.01004	69.1873	20.2567	81.444	0.791		-0.516	concordant
Spot 292	476.88	577.076	77884	1.11848	20.6581	1.91283	0.0843536	2.14757	0.0127505	0.970634	0.45197	81.6753	0.787767	82.2298	1.69633	98.3818	45.3331	81.679	0.788		0.704	concordant
Spot 224	1204.9	1310.45	872615	2.68263	20.6865	1.15601	0.085795	1.51682	0.0129596	0.98202	0.647422	83.0064	0.809914	83.5786	1.21696	99.9429	27.3502	83.018	0.81		0.715	concordant
Spot 60	1031.68	1120.82	14506.2	2.71995	20.7402	1.15597	0.0850725	1.71039	0.0131505	1.25985	0.73659	84.2212	1.05416	82.9028	1.36162	45.0597	27.6485	84.135	1.052		-1.64	concordant
Spot 30	1306.03	1533.07	31136.8	1.35177	20.798	0.82147	0.0859284	1.47385	0.0131526	1.2162	0.825183	84.2346	1.01779	83.7034	1.18419	68.5635	19.8325	84.185	1.015		-0.66	concordant
Spot 178	403.666	431.821	17030	3.36924	20.5279	1.65138	0.0872654	1.85019	0.0132487	0.688952	0.372369	84.8459	0.580718	84.9528	1.50783	87.9821	40.7164	84.846	0.581		0.131	concordant
Spot 61	2861.15	2959.4	265153	6.8434	21.0176	0.727961	0.0871057	1.34233	0.0133735	1.12766	0.840079	85.6395	0.959339	84.8036	1.0921	61.3064	17.3385	85.543	0.956		-1.02	concordant
Spot 208	223.345	252.809	7714.48	1.78139	20.3089	2.20673	0.0883822	2.6908	0.013637	1.25394	0.46601	87.3158	1.08751	85.9952	2.21869	49.5048	NA	87.295	1.087		-1.59	concordant
Spot 44	629.595	671.152	12070	3.56027	21.0464	1.26547	0.0870234	1.79219	0.0137236	1.26846	0.70777	87.8662	1.10699	84.7268	1.45684	NA	NA	87.608	1.102		-3.8	rev discord.
Spot 252	627.76	691.653	11814	2.30891	18.8033	1.55843	0.0985975	2.02678	0.0138336	1.29432	0.638611	88.5657	1.13849	95.4809	1.84699	271.827	35.7455	88.376	1.14		7.87	discord.
Spot 111	295.909	335.221	35011.3	1.76888	17.8446	2.89678	0.106081	3.22864	0.0139291	1.42424	0.441127	89.1734	1.2613	102.374	3.14414	421.714	64.7086	88.879	1.261		14.5	discord.
Spot 307	729.898	797.966	20282.8	2.51994	20.7362	0.965415	0.0906857	1.66156	0.0139086	1.33472	0.803298	89.0431	1.18031	88.1419	1.40276	63.8218	23.5681	88.96	1.177		-1.06	concordant
Spot 271	639.026	716.615	50080.6	1.93545	20.3378	1.44509	0.0932624	1.82499	0.0139304	1.11208	0.60936	89.1817	0.984942	90.5379	1.58079	126.454	34.0756	89.199	0.985		1.58	concordant
Spot 33	618.672	671.591	12190.9	2.74736	20.5062	1.38214	0.0912766	1.79814	0.0139949	1.14571	0.637162	89.5917	1.01936	88.6919	1.52714	64.5641	33.0031	89.561	1.018		-1.05	concordant
Spot 228	252.787	288.843	23026	1.64756	19.2914	1.86712	0.098713	2.14483	0.014058	1.05409	0.491457	89.9925	0.942013	95.5876	1.95665	237.528	43.0862	89.948	0.943		6.31	discord.
Spot 261	469.303	522.721	11419	2.06458	18.3117	2.87009	0.103038	3.23728	0.0140897	1.0565	0.326355	90.1944	0.94627	99.5772	3.07058	330.486	69.42	90.127	0.946		10.4	discord.
Spot 62	292.478	329.831	51322.2	1.84004	20.3613	2.11068	0.0949394	2.36776	0.0141875	1.06885	0.45142	90.8159	0.963884	92.0943	2.08461	125.319	49.7478	90.824	0.964		1.46	concordant
Spot 45	245.023	277.574	8810.99	1.76895	20.1513	2.17888	0.0932743	2.44048	0.0141998	1.05867	0.433794	90.8938	0.955509	90.5489	2.11416	81.4465	52.1923	90.89	0.955		-0.397	concordant
Spot 132	174.113	197.749	9712.75	1.73117	20.2725	2.48301	0.0935297	2.75839	0.0142723	1.04639	0.379348	91.3549	0.949188	90.7862	2.39555	75.8386	60.6557	91.35	0.949		-0.653	concordant
Spot 150	453.536	505.859	18106.1	2.037	20.8768	1.6272	0.0922562	1.83919	0.014281	0.828928	0.450704	91.4099	0.752376	89.6029	1.57735	41.7535	39.2539	91.381	0.752		-2.09	rev discord.
Spot 168	2251.38	2469.64	123452	2.42411	20.7357	0.843588	0.0946177	1.43408	0.0142979	1.15928	0.808376	91.5175	1.05345	91.7959	1.25868	99.0322	19.9967	91.537	1.052		0.318	concordant
Spot 204	1554.43	1716.45	245490	2.25466	20.2594	0.983454	0.0970319	1.549	0.0143524	1.19673	0.772581	91.8637	1.09157	94.0329	1.39116	149.438	23.0295	91.908	1.093		2.44	concordant
Spot 300	897.45	1093.09	42304.4	1.07799	20.6518	1.25208	0.0948664	1.8777	0.0143776	1.39439	0.742604	92.0238	1.27405	92.0265	1.65199	92.1018	29.7995	92.024	1.273		0.00318	concordant
Spot 97	359.498	401.685	18144.4	2.00258	20.2393	1.65801	0.0961282	2.04953	0.014432	1.15721	0.564624	92.3697	1.06129	93.1961	1.82505	114.378	39.9194	92.381	1.061		0.932	concordant
Spot 262	786.557	861.772	28018	2.4575	20.931	1.08349	0.0938466	1.82054	0.0144835	1.46267	0.803429	92.6968	1.34615	91.0803	1.58596	48.9092	25.877	92.517	1.34		-1.84	rev discord.
Spot 260	513.87	573.719	16975.3	2.01772	20.7516	1.20093	0.0941164	1.68686	0.0145036	1.16817	0.692516	92.8247	1.07658	91.3308	1.47336	52.4481	29.0395	92.743	1.074		-1.7	rev discord.
Spot 283	1144.51	1207.33	30310.1	4.28141	20.6449	1.05617	0.0961184	1.78112	0.0146102	1.4141	0.793939	93.5023	1.31268	93.187	1.58589	85.146	25.6651	93.478	1.31		-0.353	concordant
Spot 279	518.155	588.904	11647.5	1.7211	20.2735	1.39597	0.0968975	1.69278	0.0147091	0.884836	0.522712	94.1302	0.826846	93.9085	1.51837	88.3038	34.2098	94.127	0.827		-0.247	concordant
Spot 14	242.12	264.658	79265.5	2.52456	20.0185	1.99326	0.101345	2.308	0.014839	1.1635	0.504117	94.9556	1.09671	98.0175	2.15648	173.132	46.503	94.962	1.097		3.33	concordant
Spot 59	130.562	145.959	3784.99	1.99269	19.6147	2.66854	0.0967757	3.01432	0.0149967	1.36077	0.451434	95.9575	1.29609	93.7957	2.70065	39.1785	NA	95.919	1.295		-2.39	rev discord.
Spot 209	858.234	960.481	34392.2	1.97253	20.8275	0.933558	0.0980274	1.33916	0.0150293	0.888117	0.663189	96.1643	0.847714	94.9538	1.21394	64.6507	23.8665	96.11	0.846		-1.33	concordant
Spot 170	528.908	596.514	79316.3	1.83848	20.3637	1.33251	0.101385	1.67209	0.0150696	1.00449	0.600736	96.42	0.961317	98.0544	1.56288	137.96	31.377	96.441	0.962		1.76	concordant
Spot 129	1884.55	2044.85	151858	2.76278	19.291	1.53319	0.109559	1.9126	0.0154477	1.14296	0.597594	98.8211	1.12087	105.562	1.91757	260.478	35.219	98.717	1.122		6.94	discord.
Spot 42	1083.77	1242.47	98571.8	1.60478	20.5385	1.30204	0.102775	1.71197	0.0154408	1.11149	0.649242	98.777	1.08952	99.3343	1.62004	112.73	30.7475	98.792	1.089		0.59	concordant		high U/Th
Spot 151	654.925	710.759	38172.4	2.7565	20.6839	1.32932	0.101955	1.81485	0.015494	1.22507	0.675023	99.1152	1.20494	98.5793	1.70497	85.6609	31.755	99.093	1.204		-0.568	concordant
Spot 214	435.191	482.539	69795.3	2.15995	20.5735	1.44003	0.103374	1.90735	0.0155556	1.25041	0.655574	99.5057	1.23467	99.8859	1.81446	108.988	34.018	99.517	1.234		0.4	concordant
Spot 197	767.571	967.902	21705.8	0.900409	20.2377	0.91168	0.104028	1.53089	0.0155494	1.22819	0.802268	99.4666	1.21226	100.488	1.46469	124.764	21.5202	99.525	1.212		1.07	concordant
Spot 90	111.169	124.382	6263.37	1.97721	20.2595	2.36604	0.100428	3.60194	0.0155765	1.03207	0.286532	99.6389	1.02044	97.1712	3.3378	37.0046	NA	99.622	1.02		-2.63	rev discord.
Spot 156	834.81	896.679	163278	3.17089	20.5651	0.945096	0.103738	1.35084	0.0155781	0.965057	0.71441	99.6489	0.954275	100.221	1.28916	113.851	22.2936	99.671	0.954		0.601	concordant
Spot 2	355.355	383.974	17135.8	2.91794	20.2777	1.6115	0.10379	1.9541	0.015581	1.08341	0.554428	99.6669	1.0715	100.268	1.86571	114.569	38.377	99.677	1.071		0.631	concordant
Spot 306	299.094	321.788	8577.35	3.09709	19.9877	1.93471	0.104225	2.81313	0.0157156	0.999383	0.355257	100.522	0.996805	100.669	2.69609	104.135	62.1503	100.523	0.997		0.154	concordant
Spot 27	495.295	573.593	13458.2	1.48656	20.6452	1.56551	0.102283	1.82109	0.0157498	0.887552	0.487375	100.738	0.887155	98.8814	1.71582	54.3173	37.9635	100.7	0.886		-1.95	rev discord.		high U/Th
Spot 34	276.836	302.195	13004.5	2.56544	20.506	1.65568	0.103623	2.03908	0.0158624	1.12138	0.549945	101.453	1.12877	100.115	1.94401	68.3761	40.5196	101.418	1.128		-1.39	concordant
Spot 83	663.835	733.276	384610	2.24654	20.1044	1.45772	0.109394	2.05201	0.0160484	1.44422	0.703808	102.633	1.47052	105.411	2.05457	168.64	34.0578	102.673	1.472		2.81	concordant
Spot 54	58.2537	62.9798	4098.27	2.8966	18.1786	3.86598	0.114936	5.44901	0.0162989	1.59766	0.293202	104.223	1.65173	110.471	5.70373	247.323	119.99	104.212	1.652		6.14	discord.
Spot 148	965.189	1067.17	112351	2.22416	20.4359	1.1972	0.109307	1.8456	0.016306	1.40443	0.760959	104.267	1.45258	105.332	1.84657	129.493	28.1482	104.317	1.452		1.07	concordant
Spot 74	517.07	549.911	106051	3.69995	20.5714	1.11486	0.110404	1.52491	0.0166107	1.04039	0.682264	106.2	1.09584	106.335	1.53949	109.387	26.3392	106.205	1.095		0.134	concordant
Spot 134	506.987	573.594	13886.9	1.78875	20.0957	1.28297	0.111816	1.74072	0.0167461	0.968786	0.556544	107.058	1.0286	107.625	1.77758	120.19	34.0605	107.069	1.028		0.556	concordant
Spot 257	187.689	206.673	9.84423e+06	2.32335	20.7778	2.70377	0.110608	2.8819	0.0167579	0.997487	0.346121	107.133	1.05981	106.522	2.91432	92.8733	64.0391	107.129	1.06		-0.603	concordant
Spot 80	281.005	315.836	39138.5	1.89589	20.6757	1.83191	0.111998	2.08219	0.0170128	0.989496	0.47522	108.749	1.06704	107.792	2.1294	86.7148	43.4589	108.732	1.066		-0.931	concordant
Spot 15	1506.96	1869.83	31675.3	0.975947	20.7123	0.71351	0.111883	1.37574	0.0170511	1.17619	0.854954	108.992	1.27118	107.686	1.40563	78.8731	16.9318	108.773	1.263		-1.28	concordant
Spot 47	807.998	1054.02	37813.6	0.77181	20.6966	1.13245	0.112643	1.79973	0.017148	1.39778	0.776662	109.606	1.5191	108.38	1.85006	81.5033	26.9167	109.491	1.514		-1.19	concordant
Spot 259	361.983	395.61	12529.9	2.52966	20.8517	1.77061	0.111626	2.05693	0.0174039	1.0168	0.49433	111.227	1.12126	107.452	2.09729	24.5664	NA	111.115	1.119		-3.64	rev discord.
Spot 29	386.839	437.225	311421	1.80424	20.617	1.72563	0.115751	2.27578	0.0174071	1.4837	0.651953	111.248	1.63643	111.213	2.39728	110.457	40.7353	111.247	1.635		-0.0334	concordant
Spot 155	401.641	428.641	168768	3.49584	20.1833	1.50991	0.118321	1.69639	0.0174364	0.773178	0.455778	111.434	0.854177	113.549	1.82243	158.131	35.3589	111.449	0.854		1.99	concordant
Spot 203	1155.21	1257.9	26051.5	2.6437	19.101	1.20745	0.124758	1.87237	0.0175713	1.43094	0.764238	112.288	1.59286	119.376	2.10878	263.048	27.7024	112.105	1.599		6.49	discord.
Spot 301	409.128	456.941	26360.6	2.01087	20.2808	1.15391	0.117514	1.42908	0.0175632	0.834452	0.58391	112.237	0.928456	112.816	1.52589	125.033	27.3147	112.25	0.928		0.543	concordant
Spot 236	508.694	555.805	49999.4	2.53748	20.5467	1.27394	0.116582	1.52918	0.0175973	0.836023	0.546713	112.453	0.931978	111.969	1.62118	101.709	30.2567	112.441	0.931		-0.455	concordant
Spot 235	354.099	392.059	33808.9	2.19212	20.6955	1.72086	0.115649	2.44287	0.0176356	1.73125	0.708695	112.695	1.93408	111.12	2.57125	77.4677	40.9667	112.59	1.929		-1.49	concordant
Spot 136	234.205	253.398	11491.5	2.86759	20.9462	1.60958	0.112673	2.10631	0.01769	1.29215	0.613468	113.04	1.44792	108.407	2.16573	7.75128	NA	112.753	1.442		-4.41	rev discord.
Spot 101	321.112	369.625	12404.5	1.55547	20.4731	1.50135	0.115385	1.91197	0.01767	1.16583	0.609753	112.914	1.30492	110.879	2.00833	67.4378	36.0587	112.827	1.302		-1.92	rev discord.
Spot 143	341.403	377.098	20822.8	2.24762	20.6507	1.76034	0.116201	1.96857	0.0177389	0.866256	0.440044	113.35	0.973318	111.622	2.08088	74.9222	42.0028	113.321	0.973		-1.62	concordant
Spot 229	328.938	366.293	85791.9	2.06932	20.329	1.12112	0.120297	1.54486	0.0179052	1.06047	0.68645	114.403	1.2025	115.341	1.68438	134.73	26.4052	114.437	1.202		0.863	concordant
Spot 104	713.537	814.344	13507.9	1.66339	16.4289	4.36655	0.148145	4.6273	0.0180895	1.49951	0.324056	115.57	1.71754	140.273	6.06253	581.645	95.0917	115.203	1.717		20.6	discord.
Spot 18	3241.26	3323.54	2.36832e+06	9.25728	14.2012	0.548244	0.206219	0.955993	0.0213424	0.783167	0.819219	136.134	1.05498	190.375	1.65954	930.642	11.2411	116.037	1.003		40.5	discord.		high U/Th
Spot 67	435.141	460.685	18146.9	4.00326	20.242	1.23186	0.120995	1.57199	0.0181737	0.947249	0.60258	116.103	1.08994	115.973	1.72283	113.294	29.6117	116.099	1.089		-0.118	concordant
Spot 287	461.712	527.901	41308.8	1.63928	20.3315	1.16451	0.122714	1.44438	0.0182957	0.852694	0.590354	116.876	0.987614	117.529	1.60301	130.755	27.4203	116.892	0.987		0.59	concordant
Spot 179	173.993	192.792	345314	2.17504	19.4685	1.98218	0.129834	2.23632	0.0184131	1.03542	0.463003	117.619	1.20681	123.949	2.6094	247.155	45.661	117.606	1.208		5.56	discord.
Spot 145	337.143	373.74	29982.1	2.1649	20.0101	1.49974	0.125834	1.87749	0.0185129	1.10188	0.58689	118.25	1.2911	120.347	2.13074	161.996	35.5374	118.285	1.291		1.86	concordant
Spot 31	1080.04	1216.01	61892.5	1.86662	18.2316	1.43344	0.142048	2.30689	0.0189534	1.80355	0.781811	121.038	2.16261	134.867	2.91346	385.813	32.2945	119.725	2.173		11.6	discord.
Spot 169	232.085	254.527	18025.2	2.43033	20.3845	2.037	0.124401	2.28633	0.0187521	0.999839	0.437312	119.764	1.18639	119.054	2.56846	104.871	48.5883	119.754	1.186		-0.63	concordant
Spot 153	317.568	320.48	9.20463e+08	25.6229	14.7345	1.41442	0.188169	1.67171	0.0202079	0.891092	0.533042	128.97	1.13782	175.066	2.6882	854.321	29.377	125.592	1.13		33.1	discord.
Spot 161	242.855	288.647	169415	1.24632	20.0286	1.66409	0.158299	1.96827	0.0231378	1.05113	0.534037	147.457	1.53237	149.213	2.73132	177.198	38.7896	147.492	1.532		1.27	concordant
Spot 225	879.295	1095.71	240912	0.954811	19.818	1.18299	0.160108	1.69026	0.0231895	1.20727	0.714249	147.782	1.76383	150.798	2.36865	198.465	27.4928	147.912	1.765		2.17	concordant
Spot 141	560.117	615.193	35356.1	2.38992	19.421	1.22728	0.165605	2.008	0.023618	1.58698	0.790328	150.481	2.36045	155.597	2.89679	234.257	28.3952	150.709	2.368		3.6	concordant
Spot 303	907.136	1042.62	31670.9	1.57341	20.2884	0.891497	0.16079	1.35345	0.0239939	1.01729	0.751627	152.848	1.53662	151.395	1.90362	128.722	20.9944	152.696	1.53		-1.03	concordant
Spot 280	410.612	447.829	34628.5	2.5928	19.9721	0.97782	0.165087	1.47555	0.0242447	1.04485	0.708108	154.427	1.59435	155.146	2.12294	166.125	24.3547	154.472	1.592		0.5	concordant
Spot 73	527.074	609.277	29526.9	1.50679	20.3662	1.02534	0.163729	1.94546	0.0245678	1.65077	0.848526	156.46	2.5517	153.962	2.77924	115.7	24.2585	155.885	2.521		-1.75	rev discord.
Spot 118	1432.75	1753.92	7.14248e+06	1.04833	20.1581	0.833619	0.167545	1.49196	0.0246603	1.23735	0.829342	157.042	1.91967	157.286	2.17393	160.948	19.4934	157.078	1.911		0.168	concordant
Spot 57	219.558	244.678	89578.1	2.05404	19.9355	2.06387	0.170642	2.24535	0.0249064	0.880484	0.392137	158.59	1.37932	159.976	3.32335	180.517	48.1191	158.605	1.379		0.939	concordant
Spot 106	1523.51	1926.79	274884	0.887801	20.3292	0.923874	0.167715	1.45407	0.0249367	1.12276	0.772148	158.78	1.76095	157.434	2.12057	137.248	21.6972	158.618	1.752		-0.918	concordant
Spot 213	172.855	199.887	20551.1	1.50268	20.15	1.75156	0.168469	2.05022	0.0251194	1.05872	0.516394	159.93	1.67238	158.089	3.00148	130.617	41.2757	159.872	1.67		-1.25	concordant
Spot 88	357.63	382.387	30458.4	3.39482	18.3625	1.75707	0.187218	2.14273	0.0252847	1.14697	0.535285	160.969	1.82341	174.253	3.43096	358.54	40.8528	160.863	1.827		8.61	discord.
Spot 78	309.663	360	10074.6	1.44565	19.8376	1.61104	0.170337	1.91848	0.0253676	1.02874	0.536226	161.491	1.64068	159.712	2.83521	133.404	38.0645	161.428	1.638		-1.2	concordant
Spot 23	161.066	184.884	6172.31	1.58916	19.1867	2.09811	0.17436	2.48008	0.0255518	1.23142	0.496525	162.648	1.97784	163.196	3.73891	171.123	50.285	162.661	1.977		0.363	concordant
Spot 160	284.225	354.511	372795	0.950294	20.5816	1.73661	0.172676	2.04238	0.025912	1.07494	0.526318	164.912	1.75022	161.738	3.05367	115.544	40.9533	164.79	1.746		-2.1	rev discord.
Spot 1	246.696	277.711	15920	1.86919	19.8363	1.43087	0.17638	1.92567	0.0259254	1.24788	0.648024	164.996	2.03283	164.941	2.93168	164.126	34.2826	164.993	2.029		-0.0361	concordant
Spot 56	584.494	669.472	70874.3	1.61637	19.9334	1.03394	0.177938	1.62334	0.025991	1.25081	0.770518	165.409	2.04263	166.285	2.48993	178.752	24.1128	165.495	2.038		0.571	concordant
Spot 91	151.478	172.07	12009	1.7287	19.8668	1.80072	0.17593	2.28954	0.0261142	1.25214	0.546898	166.182	2.05425	164.552	3.47806	141.16	44.9838	166.121	2.051		-1.07	concordant
Spot 86	456.412	493.93	102635	2.8588	19.9753	1.54229	0.180563	1.7422	0.0263613	0.810008	0.464933	167.735	1.34114	168.545	2.70563	179.905	35.9617	167.75	1.34		0.522	concordant
Spot 315	354.547	433.339	95364.8	1.05746	19.698	1.27935	0.184719	1.7527	0.0265911	1.19781	0.683406	169.178	2.00006	172.113	2.77483	212.631	29.6469	169.318	2		1.86	concordant
Spot 5	1244.77	1379.87	134618	2.16513	20.0516	0.734151	0.182847	1.52209	0.0267645	1.33275	0.875605	170.266	2.23951	170.508	2.38907	173.832	17.1781	170.325	2.222		0.155	concordant
Spot 297	362.544	386.698	44145.5	3.52717	20.2062	1.06322	0.18461	1.40978	0.0273681	0.917007	0.650462	174.055	1.57474	172.019	2.2308	144.097	25.1003	173.914	1.569		-1.28	concordant
Spot 158	349.44	419.092	30121.2	1.179	20.0314	1.47427	0.185725	1.78505	0.0273827	0.971552	0.544271	174.147	1.66928	172.975	2.83903	156.962	35.0602	174.104	1.667		-0.733	concordant
Spot 140	509.721	583.699	57890	1.6192	19.9702	1.13053	0.188201	1.59601	0.0275167	1.12627	0.705679	174.987	1.94433	175.093	2.56685	176.501	26.3833	174.996	1.939		0.0657	concordant
Spot 36	737.693	873.547	82579.6	1.27605	19.5556	1.00337	0.198543	1.61948	0.0283834	1.27039	0.784445	180.423	2.2603	183.893	2.72401	228.689	23.2264	180.74	2.261		2.08	concordant
Spot 154	437.328	464.48	78100.1	3.78512	19.805	1.04327	0.196248	1.29231	0.0284341	0.762646	0.590143	180.741	1.35927	181.947	2.15269	197.636	24.2607	180.788	1.358		0.725	concordant
Spot 157	414.887	457.873	31559.2	2.26814	20.2462	1.3814	0.192587	1.70959	0.0286899	0.95679	0.559659	182.344	1.72021	178.834	2.80324	132.713	33.3082	182.169	1.715		-2.12	rev discord.
Spot 109	372.986	416.379	46748.9	2.01995	19.6735	1.11597	0.200351	1.4026	0.0289864	0.834845	0.595212	184.201	1.51603	185.423	2.37711	200.999	26.1887	184.251	1.514		0.722	concordant
Spot 295	272.303	311.042	19496.1	1.65185	19.761	1.51881	0.19888	1.70843	0.0290731	0.777513	0.455104	184.744	1.41602	184.178	2.87769	176.903	35.4642	184.731	1.415		-0.335	concordant
Spot 102	342.114	391.395	8640.82	1.6314	16.8721	2.02235	0.229939	2.2257	0.0291537	0.928719	0.417271	185.249	1.69596	210.148	4.22501	499.385	44.5711	184.942	1.699		13.9	discord.
Spot 110	1094.55	1235.03	484567	1.83112	20.0185	0.733093	0.199781	1.16244	0.0292271	0.902127	0.776062	185.709	1.65143	184.941	1.96542	175.124	17.1246	185.605	1.642		-0.452	concordant
Spot 276	1669.58	1894.63	316989	1.74338	19.9	0.806375	0.201041	1.32479	0.0292605	1.0511	0.793407	185.918	1.92627	186.007	2.25168	187.11	18.7821	185.931	1.916		0.0521	concordant
Spot 275	572.852	662.995	140513	1.4934	18.5025	1.56621	0.216186	1.69735	0.0292844	0.654138	0.385388	186.068	1.19975	198.731	3.06359	351.797	35.3944	186.076	1.201		7.23	discord.
Spot 198	278.29	313.333	69543.8	1.86622	15.8785	2.28972	0.255012	2.62801	0.0295938	1.28974	0.490768	188.006	2.38977	230.639	5.42217	691.152	48.8164	186.35	2.393		22.7	discord.
Spot 26	463.724	505.657	80894.8	2.59879	20.1941	1.21797	0.199204	1.52195	0.0294322	0.912617	0.599636	186.994	1.68202	184.452	2.56706	152.003	28.5353	186.846	1.677		-1.49	concordant
Spot 219	802.299	893.498	3.17946e+06	2.06735	19.7687	0.910119	0.203857	1.66785	0.0293937	1.39765	0.837992	186.753	2.57269	188.384	2.86773	208.893	21.1015	187.034	2.563		0.953	concordant
Spot 19	177.219	192.587	32665.8	2.70988	19.9175	1.51204	0.201741	1.8071	0.0295523	0.894722	0.495114	187.746	1.65558	186.598	3.08032	172.074	36.6443	187.711	1.653		-0.67	concordant
Spot 176	759.374	819.899	26578.9	2.94843	19.7118	1.02467	0.204534	1.61474	0.0296103	1.2468	0.772133	188.109	2.31145	188.955	2.78407	199.543	23.8375	188.208	2.303		0.491	concordant
Spot 38	301.685	337.624	53043.9	1.97266	19.8196	1.19472	0.204159	1.6047	0.0296402	1.07097	0.667395	188.296	1.98743	188.64	2.76256	192.963	27.7885	188.319	1.983		0.199	concordant
Spot 264	186.863	203.869	130446	2.58218	19.4004	1.66474	0.211495	1.92289	0.0300007	0.962332	0.500461	190.553	1.80691	194.806	3.40851	246.669	38.3534	190.635	1.807		2.42	concordant
Spot 99	194.238	218.454	10473.7	1.88495	20.0383	1.70059	0.202161	2.0235	0.0304123	1.04203	0.514963	193.128	1.98261	186.953	3.45517	109.625	40.961	192.829	1.975		-3.55	rev discord.
Spot 63	89.9187	97.1863	57609.7	2.90757	20.0783	1.96677	0.208133	2.3214	0.0306304	1.23227	0.530832	194.493	2.36089	191.985	4.06077	161.264	46.0069	194.388	2.355		-1.42	concordant
Spot 119	199.254	219.712	8422.64	2.28875	19.4865	1.41975	0.21353	1.99158	0.0314336	1.08063	0.5426	199.514	2.12299	196.511	3.55826	160.623	39.1316	199.373	2.117		-1.67	concordant
Spot 270	257.839	289.263	169310	1.92819	19.4162	1.20453	0.222522	1.54198	0.0315949	0.962685	0.624318	200.523	1.90069	204.007	2.84988	244.465	27.7328	200.676	1.9		1.89	concordant
Spot 253	201.846	216.883	110562	3.15445	19.5415	1.10667	0.222716	1.63004	0.0317842	1.19657	0.734072	201.705	2.37617	204.168	3.01478	232.673	25.5463	201.924	2.372		1.33	concordant
Spot 289	164.449	173.664	15679	4.19356	19.9843	1.5788	0.214957	2.15089	0.0318706	1.28052	0.595346	202.245	2.54959	197.704	3.86404	143.887	40.5383	201.934	2.538		-2.49	rev discord.
Spot 165	259.212	287.773	11838.4	2.13277	18.0932	2.18708	0.257718	2.40867	0.0346842	0.984162	0.408592	219.798	2.12671	232.827	5.01155	366.459	49.5553	219.867	2.129		6.42	discord.
Spot 290	539.229	593.12	38715.3	2.35138	19.3385	1.22879	0.260473	1.59655	0.0369835	1.01698	0.636987	234.108	2.33812	235.048	3.34998	244.461	28.3461	234.174	2.332		0.447	concordant
Spot 269	426.185	513.315	48092.5	1.14948	19.2867	1.05406	0.270209	1.42045	0.03828	0.950935	0.66946	242.163	2.26009	242.861	3.06819	249.598	24.2629	242.224	2.252		0.322	concordant
Spot 11	1777.71	1974.75	157060	2.12011	19.4666	0.562114	0.2771	1.64087	0.0393285	1.54145	0.939411	248.669	3.76013	248.354	3.61508	245.4	12.9769	248.41	3.604		-0.169	concordant
Spot 49	3539.61	4178.34	760866	1.30228	19.2292	0.658768	0.283786	1.41678	0.039851	1.2543	0.885321	251.909	3.09877	253.657	3.18004	269.823	15.0953	252.578	3.053		0.799	concordant
Spot 68	1255.42	2089.81	405731	0.353582	18.5505	0.802252	0.350628	1.50369	0.0475472	1.27179	0.845776	299.445	3.7212	305.193	3.96371	349.369	18.1284	301.082	3.695		2.2	concordant
Spot 206	243.018	273.389	82299.3	1.88043	19.1586	1.12907	0.341842	1.42499	0.0479755	0.865455	0.607342	302.08	2.55406	298.567	3.6861	271.162	25.9455	301.745	2.536		-1.34	concordant
Spot 237	970.394	1000.92	152136	7.47028	12.6559	1.05794	0.694226	2.24509	0.0642302	1.98013	0.881982	401.3	7.70398	535.336	9.34126	1156.76	20.9903	318.223	7.932		46.2	discord.
Spot 105	478.113	557.726	10344.6	1.4113	12.2442	4.23487	0.593084	4.4083	0.0539561	1.21079	0.27466	338.764	3.9958	472.835	16.6655	1190.08	83.7177	336.66	3.999		40.5	discord.
Spot 87	754.492	774.405	208853	8.90445	18.4196	0.859938	0.43686	1.51241	0.0587372	1.24398	0.822514	367.941	4.44893	368.036	4.66906	368.608	19.3782	367.976	4.337		0.0306	concordant
Spot 195	749.809	805.733	112353	3.15083	17.5362	1.29589	0.501847	1.75169	0.064252	1.17851	0.672782	401.432	4.58662	412.952	5.94344	477.83	28.6482	402.882	4.574		3.39	concordant
Spot 263	297.957	335.114	91279.3	1.88443	18.2721	1.07839	0.489705	1.37175	0.0654736	0.847599	0.617896	408.827	3.35762	404.71	4.5787	381.253	24.2463	408.262	3.316		-1.21	concordant
Spot 7	544.103	606.905	137671	2.03598	18.0833	0.836496	0.501316	1.09097	0.0661593	0.699531	0.6412	412.975	2.7983	412.593	3.699	410.432	18.7235	412.92	2.767		-0.111	concordant
Spot 286	267.151	327.037	56099.2	1.04833	18.1771	1.10609	0.510133	1.3538	0.0678254	0.778015	0.574691	423.041	3.18565	418.539	4.6436	393.778	24.8518	422.524	3.151		-1.29	concordant
Spot 285	268.956	298.627	38454.6	2.1302	17.7903	0.982047	0.520587	1.52166	0.0678997	1.13559	0.746284	423.49	4.65454	425.543	5.28972	436.662	22.5608	424.008	4.571		0.583	concordant
Spot 124	1017.3	1138.53	132931	1.97199	17.8926	0.752265	0.522715	1.31119	0.0683253	1.07392	0.819038	426.058	4.42759	426.963	4.57031	431.83	16.763	426.43	4.289		0.259	concordant
Spot 274	312.631	401.937	183289	0.822656	17.6523	1.15496	0.538176	1.47307	0.0694803	0.914193	0.620604	433.024	3.82864	437.221	5.23329	459.401	25.6345	433.553	3.798		1.17	concordant
Spot 240	828.253	847.737	132636	9.98973	16.8693	0.771657	0.657748	1.57144	0.0810697	1.36845	0.870824	502.505	6.61533	513.236	6.33103	561.296	16.8357	509.494	6.351		2.77	concordant		high U/Th
Spot 77	286.368	317.954	91617.2	2.13063	16.4171	0.928041	0.792408	1.18951	0.0950775	0.743416	0.624977	585.497	4.16086	592.537	5.33966	619.568	20.0599	586.792	4.097		1.53	concordant
Spot 167	472.319	512.958	91774.3	2.73121	15.8158	1.0444	0.899201	1.27453	0.103678	0.730326	0.573014	635.928	4.42262	651.301	6.12735	704.917	22.2259	638.147	4.379		3.14	concordant
Spot 251	153.897	192.624	277527	0.933865	13.6089	0.968838	1.28619	1.71266	0.127643	1.41227	0.824608	774.406	10.3054	839.607	9.7838	1016.19	19.6281	810.58	10.46		11.1	discord.
Spot 194	112.602	123.668	171197	2.39132	13.9968	1.13519	1.53102	1.40972	0.156152	0.835797	0.592882	935.355	7.27698	942.907	8.65881	960.606	23.2046	937.526	6.985		1.15	concordant
Spot 71	146.219	171.153	52629.3	1.37808	13.9916	0.924558	1.56517	1.28989	0.160439	0.899262	0.697159	959.215	8.01478	956.516	7.99169	950.323	18.9206	957.846	7.357		-0.399	concordant
Spot 144	831.05	906.354	128339	2.59342	13.425	0.749511	1.58512	1.40027	0.155154	1.18279	0.844683	929.793	10.2412	964.384	8.71836	1044.12	15.1402	963.14	9.065		5.5	discord.
Spot 267	260.197	281.005	155171	2.9386	13.5345	0.732737	1.66021	1.20536	0.164197	0.956874	0.793851	980.058	8.69986	993.455	7.63838	1023.13	14.8335	990.708	7.666		1.98	concordant
Spot 9	355.412	459.142	420507	0.805183	13.2232	0.613056	1.7909	1.03347	0.172617	0.831999	0.805051	1026.51	7.89529	1042.15	6.73385	1075.09	12.3093	1040.22	6.813		2.25	concordant
Spot 277	23.3741	25.8182	11834.7	2.24738	9.42792	4.28273	2.63521	4.63497	0.183543	1.76495	0.38079	1086.3	17.6443	1310.52	34.1292	1698.99	78.9977	1090.6	18		31.7	discord.
Spot 281	115.996	122.705	74088	4.06327	12.9589	1.28417	2.00508	1.61408	0.189913	0.976822	0.605188	1120.91	10.0502	1117.23	10.9357	1110.07	25.6737	1119.45	9.329		-0.49	concordant
Spot 70	593.585	597.691	195619	33.9691	12.7839	0.845486	2.0586	1.18191	0.192429	0.825732	0.698642	1134.52	8.59004	1135.15	8.07742	1136.39	16.8085	1134.9	7.656		0.0826	concordant
Spot 220	101.046	108.878	93817.5	3.03192	12.5387	0.794956	2.14843	1.32386	0.196836	1.05855	0.799593	1158.3	11.2228	1164.55	9.17301	1176.2	15.7382	1164.28	9.215		0.823	concordant
Spot 69	359.525	391.683	867856	2.62722	12.3992	0.580397	2.25919	1.1767	0.204676	1.02361	0.869893	1200.39	11.2111	1199.65	8.28228	1198.33	11.4288	1199.38	8.002		-0.107	concordant
Spot 107	577.155	624.742	177929	2.85014	11.19	0.637333	2.28485	1.5147	0.187024	1.37404	0.907136	1105.23	13.9558	1207.62	10.6983	1395.62	12.2236	1271.5	10.39		16.6	discord.
Spot 298	1058.48	1325.43	595708	0.931793	10.1444	0.655456	3.63702	1.15435	0.268934	0.950208	0.823155	1535.39	12.9821	1557.67	9.1936	1588	12.2505	1563.11	9.081		2.41	concordant
Spot 123	123.677	139.306	49246.9	1.85971	9.42093	0.737224	3.60192	1.35757	0.248059	1.13875	0.838815	1428.46	14.5904	1549.96	10.7895	1719.75	13.5825	1580.3	11.28		13.6	discord.
Spot 173	567.265	844.486	298849	0.48087	9.87403	0.645953	3.80244	1.08742	0.273033	0.874754	0.804433	1556.18	12.0943	1593.26	8.74253	1642.66	11.9882	1599.31	8.806		3.86	discord.
Spot 189	141.136	166.993	85435	1.28272	9.7346	0.868727	4.13075	1.4517	0.293526	1.16302	0.801146	1659.13	17.0129	1660.41	11.8679	1662.01	16.0819	1660.66	11.7		0.128	concordant
Spot 250	568.485	580.19	1.1266e+06	11.4139	9.18463	0.692667	3.59711	1.62469	0.240785	1.46964	0.904564	1390.78	18.3849	1548.89	12.909	1771.82	12.6453	1660.99	10.98		20.8	discord.		high U/Th
Spot 37	116.446	154.076	145476	0.727221	6.14194	0.732672	10.8133	1.1326	0.484081	0.863587	0.762483	2545.02	18.1587	2507.21	10.5271	2476.72	12.3631	2498.38	10.11		-2.58	rev discord.

## Sheet: 18COA-6
Aliquot Name	18COA-6
Stratigraphic Formation Name	Empire tuff
Stratigraphic Age	Miocene
Rock Type	rhyolite tuff
Mineral	Zircon
Method	U-Pb
Latitude	43.3497
Longitude	-124.338
Internal Uncertainty Level	one sigma
External Uncertainty 206/238 (% two sigma)	0.904403
External Uncertainty 206/207 (% two sigma)	0.801236
Analysis Purpose	igneous
Laboratory Name	Arizona LaserChron Center
Analyst Name	M. Darin
Aliquot Reference
Aliquot Instrumental Method	LA-ICPMS
Aliquot Instrumental Reference	Gehrels, G.E., Valencia, V., Ruiz, J., 2008, Enhanced precision, accuracy, efficiency, and spatial resolution of U-Pb ages by laser ablation-multicollector-inductively coupled plasma-mass spectrometry: Geochemistry, Geophysics, Geosystems, v. 9, Q03017, doi:10.1029/2007GC001805.
	Gehrels, G. and Pecha, M., 2014, Detrital zircon U-Pb geochronology and Hf isotope geochemistry of Paleozoic and Triassic passive margin strata of western North America: Geosphere, v. 10 (1), p. 49-65.
§ Note: dsk discordance criterion and Stacey-Kramers common-Pb correction applied to all dates
								Isotope ratios						Apparent ages (Ma)				Best Age§
Analysis	U	eU	206Pb	U/Th	206Pb*	±	207Pb*	±	206Pb*	±	error	206Pb*	±	207Pb*	±	206Pb*	±	Concordia Age	±1σ	Discordance (dsk) before 204-corr	Concordance before 204-corr	Age Class	Notes
	(ppm)	(ppm)	204Pb		207Pb*	(%)	235U	(%)	238U	(%)	corr.	238U	(Ma)	235U	(Ma)	207Pb*	(Ma)	(Ma)	(Ma)	(%)
Spot 38	2821.87	4087.07	342922	0.524137	20.784	2.20939	0.00770781	2.48591	0.00115809	1.13945	0.458363	7.46119	0.0849674	7.79637	0.193069	112.582	52.1355	7.4416	0.0847	0.264	concordant	P	high eU
Spot 32	300.428	379.751	6533.56	0.890036	17.9779	4.18611	0.00924177	4.55952	0.00125056	1.77454	0.389195	8.05661	0.142879	9.34084	0.423944	354.217	94.8989	7.981	0.142	0.937	discord.	I	YSCG, YC2σ
Spot 47	327.68	412.08	3225.16	0.912375	21.7992	4.66999	0.00711896	5.45723	0.00124663	1.36199	0.249575	8.03128	0.109317	7.20286	0.391686	NA	NA	8.08	0.11	-0.606	rev discord.	I	YC2σ
Spot 21	519.333	662.732	3127.96	0.851077	14.6398	6.91547	0.011376	7.07512	0.00129111	1.44118	0.203697	8.31769	0.119796	11.4858	0.808054	738.415	146.728	8.131	0.117	2.24	discord.	I	YC2σ
Spot 4	493.656	667.662	4162.14	0.666696	21.7949	3.1436	0.00756344	3.9916	0.00129155	1.47266	0.36894	8.3205	0.122454	7.65089	0.304245	NA	NA	8.36	0.123	-0.473	rev discord.	I	YC2σ
Spot 36	402.108	518.376	3654.11	0.812742	18.2252	3.84561	0.00931088	4.24648	0.0013227	1.57002	0.369722	8.52102	0.133693	9.41037	0.397763	243.286	90.926	8.469	0.133	0.614	discord.	I	YC2σ
Spot 43	432.037	550.203	4227.42	0.859208	15.7445	4.4904	0.0116434	5.1015	0.00139873	2.35099	0.460843	9.01047	0.211687	11.7542	0.596182	616.956	97.7923	8.849	0.208	1.79	discord.	I	YC2σ
Spot 5	366.375	403.561	3068.21	2.31535	20.7847	2.43121	0.0233388	2.83796	0.00389672	1.03895	0.366092	25.071	0.259971	23.4256	0.657198	NA	NA	25.169	0.261	-0.391	rev discord.	X
Spot 35	2648.68	2848.74	167914	3.11138	21.2655	0.874495	0.032549	1.42858	0.00501024	1.1293	0.79051	32.2174	0.362925	32.5232	0.457257	55.1393	20.8721	32.199	0.363	0.0569	concordant	P	high eU
Spot 2	1679.66	1802.03	67239	3.22569	20.6419	0.952129	0.0469666	1.42235	0.00703882	1.05232	0.739847	45.2162	0.474154	46.6031	0.647877	118.559	22.5499	45.132	0.473	0.186	concordant	P	high eU
Spot 31	393.717	447.357	45210.6	1.72489	19.7132	1.69766	0.0510976	1.9205	0.00732271	0.862279	0.448987	47.0332	0.404082	50.6015	0.947986	223.08	39.7074	46.817	0.402	0.462	discord.	X
Spot 17	404.283	500.972	17418.1	0.982598	21.4308	1.38775	0.047352	1.90729	0.00746701	0.922408	0.483622	47.9566	0.440714	46.9768	0.875573	NA	NA	48.016	0.441	-0.124	concordant	X
Spot 48	152.317	169.54	3958.92	2.07833	19.8143	2.73026	0.0493227	3.24186	0.00762439	0.931943	0.287471	48.9636	0.454584	48.8855	1.54726	45.035	NA	48.968	0.455	-0.00971	concordant	X
Spot 10	228.732	270.45	11791.3	1.28844	20.4703	2.67875	0.051711	2.9286	0.00784737	1.16575	0.398058	50.3899	0.585131	51.194	1.4621	89.0227	63.6703	50.341	0.585	0.0973	concordant	X
Spot 37	5285.93	5704.53	173435	2.96748	20.5366	0.630045	0.0841257	1.16389	0.0125	0.978368	0.840602	80.0806	0.778637	82.0164	0.917045	138.741	14.8181	79.96	0.776	0.151	concordant	P	high eU
Spot 9	290.582	330.325	14651.5	1.71819	20.9891	1.67497	0.0837437	2.27838	0.0129711	1.54286	0.677175	83.0792	1.27357	81.6585	1.78765	40.3198	40.0941	83.168	1.274	-0.107	concordant	X
Spot 23	780.766	905.53	93131.3	1.47062	21.1633	0.919265	0.0893673	1.39579	0.013716	1.04939	0.751826	87.8179	0.915302	86.9138	1.16266	62.1561	21.9019	87.875	0.915	-0.0649	concordant	X
Spot 27	385.412	418.982	47235.2	2.69795	20.1476	1.15432	0.0960078	1.35772	0.014079	0.713287	0.525356	90.1264	0.638387	93.0845	1.20763	169.553	26.9891	89.941	0.637	0.208	concordant	X
Spot 1	1169.01	1198.19	58728.5	9.41477	21.1188	0.918453	0.0944824	1.8064	0.0144984	1.55374	0.860131	92.7916	1.43142	91.6703	1.58339	62.5782	21.9256	92.862	1.429	-0.0764	concordant	P	high eU
Spot 24	1367.82	1444.58	152180	4.18755	20.9223	0.696841	0.0958489	1.43388	0.014525	1.2531	0.873921	92.9604	1.15653	92.9373	1.27344	92.356	16.5234	92.962	1.154	-0.00156	concordant	P	high eU
Spot 39	695.599	751.773	142450	2.90998	20.3346	1.20535	0.101784	1.63412	0.0149833	1.10275	0.674828	95.8719	1.0494	98.4215	1.53284	160.658	28.2088	95.711	1.047	0.169	concordant	X
Spot 11	560.99	649.329	25090.4	1.49234	20.7333	1.30211	0.100573	1.78023	0.0152469	1.20834	0.678754	97.5462	1.16981	97.3052	1.65184	91.3798	30.9526	97.561	1.169	-0.0157	concordant	X
Spot 22	549.066	596.87	44903.7	2.69918	18.5194	1.74245	0.11825	1.89673	0.0159214	0.745107	0.392839	101.827	0.752763	113.484	2.03656	365.444	39.3008	101.085	0.747	0.734	discord.	X
Spot 44	52.4118	57.9596	9572.96	2.22013	19.5999	3.53101	0.12051	3.98388	0.0175838	0.99217	0.249046	112.367	1.10521	115.534	4.35057	181.251	89.9168	112.165	1.103	0.182	concordant	X
Spot 3	1162.86	1237.35	28178.2	3.66826	17.5969	1.59544	0.176852	2.01281	0.0226992	1.22696	0.609575	144.692	1.75554	165.348	3.07131	472.317	35.3243	143.326	1.738	0.955	discord.	P	high eU
Spot 42	125.607	135.701	15031.5	2.92419	19.6505	2.05255	0.157499	2.35237	0.0227873	1.10717	0.470664	145.248	1.59017	148.511	3.25008	200.947	48.2045	145.034	1.587	0.149	concordant	X
Spot 12	120.122	131.8	9976.37	2.4171	19.4683	1.66096	0.161254	2.15881	0.0233433	1.05233	0.487458	148.751	1.54743	151.8	3.04388	199.674	43.7788	148.55	1.544	0.136	concordant	X
Spot 26	53.4378	56.0944	8639.26	4.72713	19.425	2.79041	0.165143	3.06498	0.0239827	1.24586	0.406481	152.778	1.88102	155.195	4.41104	192.284	65.1167	152.618	1.878	0.106	concordant	X
Spot 14	302.31	336.568	53047.3	2.07371	19.8723	1.58061	0.167069	1.88262	0.0241114	1.0219	0.542806	153.588	1.55096	156.873	2.7365	206.749	36.6881	153.371	1.548	0.143	concordant	X
Spot 8	288.959	311.056	67907.6	3.07304	19.8508	0.82491	0.205088	1.24798	0.0295341	0.927684	0.74335	187.632	1.71554	189.422	2.15655	211.778	19.3213	187.51	1.708	0.0657	concordant	X
Spot 46	307.519	332.739	115937	2.86551	12.2517	1.40512	0.406469	1.94494	0.0360303	1.34472	0.691394	228.18	3.01471	346.329	5.7074	1241.2	27.5482	219.396	2.897	3.92	discord.	X
Spot 18	989.834	1006.46	855458	13.9889	12.3884	1.22991	0.633497	1.86654	0.0567191	1.40402	0.752207	355.642	4.85805	498.272	7.35022	1221.56	24.1765	343.743	4.673	3.44	discord.	M	high U/Th
Spot 7	984.068	1037.39	2.47713e+07	4.33672	11.3858	0.820317	2.78857	1.56341	0.229268	1.33091	0.851289	1330.66	16.0017	1352.48	11.685	1387.13	15.7488	1326.82	11.45	0.319	concordant	P	high eU
Spot 6 C1	506.203	581.079	156996	1.58873	11.574	0.600842	2.86716	1.3152	0.240112	1.16992	0.889537	1387.28	14.6025	1373.33	9.90135	1351.68	11.5929	1389.81	8.934	-0.203	rev discord.	X
Spot 33	340.176	357.457	429092	4.62585	11.4712	0.644581	2.87213	1.37086	0.238065	1.20986	0.882554	1376.63	14.997	1374.63	10.325	1371.51	12.4029	1376.99	9.536	-0.0292	concordant	X
Spot 45	564.579	587.311	389039	5.83661	11.4624	0.637255	2.95567	1.28744	0.244714	1.11865	0.868895	1411.15	14.1775	1396.3	9.768	1373.68	12.2586	1413.9	9.126	-0.217	rev discord.	X
Spot 28	1289.04	1370.67	630416	3.7109	10.3849	0.68846	3.23487	1.31004	0.242944	1.11456	0.850777	1401.98	14.0435	1465.56	10.1612	1558.9	12.9164	1389.82	10.08	0.964	discord.	P	high eU
Spot 13	419.435	444.764	210129	3.89146	5.93887	0.703472	9.56207	1.20157	0.410288	0.974113	0.8107	2216.24	18.2688	2393.53	11.0458	2548.04	11.7841	2139.54	11.99	4.07	discord.	X

## Sheet: 18COA-7
Aliquot Name	18COA-7
Stratigraphic Formation Name	base of Tunnel Point Sst
Stratigraphic Age	Oligocene
Rock Type	sandstone
Mineral	Zircon
Method	U-Pb
Latitude	43.3454
Longitude	-124.346
Internal Uncertainty Level	one sigma
External Uncertainty 206/238 (% two sigma)	1.14152
External Uncertainty 206/207 (% two sigma)	0.805101
Analysis Purpose	DZ
Laboratory Name	Arizona LaserChron Center
Analyst Name	M. Darin
Aliquot Reference
Aliquot Instrumental Method	LA-ICPMS
Aliquot Instrumental Reference	Gehrels, G.E., Valencia, V., Ruiz, J., 2008, Enhanced precision, accuracy, efficiency, and spatial resolution of U-Pb ages by laser ablation-multicollector-inductively coupled plasma-mass spectrometry: Geochemistry, Geophysics, Geosystems, v. 9, Q03017, doi:10.1029/2007GC001805.
	Gehrels, G. and Pecha, M., 2014, Detrital zircon U-Pb geochronology and Hf isotope geochemistry of Paleozoic and Triassic passive margin strata of western North America: Geosphere, v. 10 (1), p. 49-65.
								Isotope ratios						Apparent ages (Ma)				Best Age
Analysis	U	eU	206Pb	U/Th	206Pb*	±	207Pb*	±	206Pb*	±	error	206Pb*	±	207Pb*	±	206Pb*	±	Concordia Age	±1σ	within 10% of YSCG (*)	Discordance (dc)	Concordance	Age Class	Notes
	(ppm)	(ppm)	204Pb		207Pb*	(%)	235U	(%)	238U	(%)	corr.	238U	(Ma)	235U	(Ma)	207Pb*	(Ma)	(Ma)	(Ma)		(%)
Spot 149	924.738	1079.93	100629	1.40026	20.5499	1.55763	0.0330772	2.01972	0.00492174	1.28519	0.636321	31.6498	0.405763	33.0426	0.656626	135.458	36.6034	31.622	0.406	--	4.38	discord.	P	high eU
Spot 178	178.274	194.891	22395.5	2.52111	18.5542	3.49419	0.0367879	3.68169	0.00499112	1.15803	0.314539	32.0948	0.370745	36.6831	1.32645	348.27	79.0434	32.043	0.371	--	13.6	discord.	D	does not overlap concordia within 2σ
Spot 223	187.288	203.328	7329.12	2.74397	18.3397	3.98193	0.0374108	4.28986	0.00514167	1.5455	0.360268	33.0604	0.509639	37.293	1.57079	318.967	90.9904	33.002	0.509	--	12.3	discord.	D	does not overlap concordia within 2σ
Spot 54	972.159	1051.88	8498.6	2.86574	18.4876	2.27891	0.0376849	2.61353	0.00520465	1.27211	0.486739	33.4643	0.4246	37.5612	0.963741	307.832	51.987	33.351	0.424	--	11.8	discord.	P	high eU
Spot 133	168.521	182.879	11184.7	2.75818	19.5868	4.61752		4.81423	0.00520258	1.33821	0.277971	33.4511	0.446487	35.7425	1.69079	192.504	107.567	33.442	0.446	YSCG	6.74	discord.	Y	YSCG, YC2σ
Spot 63	399.341	455.468	4546.29	1.67203	20.9505	2.28921	0.032099	2.68971	0.00522348	0.972303	0.36149	33.5851	0.3257	32.0806	0.849387	NA	NA	33.57	0.326	*	-4.66	rev discord.	S	YC2σ
Spot 21	293.261	310.404	34866.7	4.02003	21.6293	2.49941	0.034629	2.79456	0.00544275	1.24809	0.446615	34.9911	0.435538	34.5666	0.949728	5.17445	NA	34.988	0.435	*	-1.24	concordant	S	YC2σ
Spot 242	564.145	608.775	18219.2	2.97055	19.9315	2.31459	0.0379156	2.92307	0.00553711	1.78118	0.609352	35.596	0.632282	37.787	1.08424	179.232	54.0563	35.54	0.632	*	6.09	discord.	S	YC2σ
Spot 231	421.952	486.398	4004.65	1.53866	21.1967	2.08047	0.0334691	4.85212	0.0055525	0.971135	0.200147	35.6947	0.345686	33.4276	1.59554	NA	NA	35.686	0.346	*	-6.67	rev discord.	S
Spot 127	562.65	658.033	10064.9	1.38623	19.5172	1.86806	0.0383366	2.37637	0.0055628	1.46455	0.616295	35.7608	0.522283	38.1987	0.890882	194.207	43.5163	35.688	0.522	*	6.72	discord.	D	does not overlap concordia within 2σ
Spot 234	312.663	367.531	55066.8	1.33914	21.3196	2.58333	0.0383103	2.8471	0.00592291	1.19678	0.42035	38.0689	0.454257	38.173	1.06665	44.7249	NA	38.069	0.454		0.278	concordant	S
Spot 165	609.618	705.035	7850.79	1.50142	19.1715	1.86736	0.0413993	2.33233	0.00595163	1.39203	0.596842	38.2529	0.530916	41.1893	0.941445	215.747	43.3359	38.164	0.531		7.55	discord.	D	does not overlap concordia within 2σ
Spot 176	189.89	206.664	7674.18	2.66032	20.3748	3.37527	0.0390999	3.60031	0.00598954	0.994982	0.27636	38.4959	0.381886	38.9448	1.37559	66.6742	NA	38.496	0.382		1.18	concordant	S
Spot 283	347.261	386.366	8500.27	2.08686	19.59	2.37506	0.0410247	2.68719	0.00600232	0.898223	0.334261	38.5778	0.34548	40.824	1.07526	174.888	59.1096	38.567	0.345		5.77	discord.	S
Spot 116	179.682	198.106	4356.92	2.29196	19.8773	3.00778	0.0390161	4.09106	0.00600276	1.46941	0.359177	38.5806	0.565216	38.8629	1.55987	56.3107	NA	38.581	0.565		0.743	concordant	S
Spot 13	224.722	269.488	3823.4	1.17968	16.6641	3.27696	0.0473453	3.57521	0.00606951	1.19225	0.333476	39.0083	0.463671	46.9703	1.64104	474.974	74.5703	38.875	0.463		19	discord.	D	does not overlap concordia within 2σ
Spot 59	238.694	269.453	19021.4	1.82359	16.5666	2.6741	0.0503016	2.95193	0.00610489	1.16962	0.396221	39.235	0.457506	49.8323	1.4355	594.864	58.7411	38.915	0.456		24.5	discord.	D	does not overlap concordia within 2σ
Spot 60	124.218	137.175	3745.9	2.25301	18.519	3.84945	0.0420642	4.13661	0.00607682	1.37072	0.331364	39.0552	0.533721	41.8373	1.69548	204.45	90.6078	39.038	0.534		7.02	discord.	S
Spot 253	464.651	544.57	4788.56	1.3663	17.2057	4.04106	0.0476505	4.16924	0.00623987	1.01468	0.243373	40.0998	0.405621	47.2661	1.92548	427.77	90.2021	40.045	0.405		16.8	discord.	D	does not overlap concordia within 2σ
Spot 265	954.858	1164.42	21912.2	1.07079	20.46	1.37589	0.0419856	1.916	0.00628152	1.3235	0.690762	40.3666	0.532583	41.7608	0.783906	122.583	32.6272	40.344	0.533		3.47	concordant	P	high eU
Spot 190	361.799	406.644	32197.2	1.89593	19.593	2.67333	0.0456582	2.96408	0.0065191	1.28022	0.431913	41.8884	0.534526	45.3333	1.31416	231.561	61.7393	41.843	0.534		8.08	discord.
Spot 252	215.532	256.846	5153.04	1.22597	19.101	3.02387	0.0450813	3.39296	0.00656392	1.35767	0.400142	42.1755	0.570733	44.773	1.48612	186.194	72.4083	42.155	0.571		6.11	discord.
Spot 51	833.906	965.742	31739.7	1.48645	20.9514	1.93028	0.0433239	2.35911	0.00662391	1.35508	0.574405	42.5597	0.57482	43.0641	0.994686	71.227	45.9404	42.561	0.575		1.2	concordant
Spot 297	833.297	931.778	14201.4	1.98846	20.7735	1.94738	0.0432245	2.35737	0.00663863	1.3197	0.55982	42.6539	0.561047	42.9673	0.991767	60.4836	46.5663	42.655	0.561		0.748	concordant
Spot 241	456.34	520.448	33412.9	1.67279	20.3053	2.12851	0.0452566	2.41377	0.00668448	1.13087	0.46851	42.9476	0.484069	44.9433	1.06117	152.758	49.9666	42.932	0.484		4.64	discord.
Spot 228	669.002	794.724	12741.3	1.2505	20.8425	2.03003	0.0442553	2.56138	0.00681758	1.55798	0.608258	43.7998	0.68008	43.9701	1.10221	53.2474	48.5173	43.801	0.68		0.396	concordant
Spot 87	470.533	570.762	12917.5	1.10323	16.7105	2.60859	0.0565563	2.82761	0.00696538	1.08574	0.383978	44.7461	0.484143	55.8612	1.53687	562.978	56.8895	44.452	0.483		22.8	discord.
Spot 311	698.421	758.238	107023	2.74382	21.2878	1.43804	0.0452783	1.84279	0.00700626	1.15216	0.625228	45.0078	0.516757	44.9644	0.810521	42.6429	34.3896	45.007	0.517		-0.0985	concordant
Spot 138	1216.53	1376.53	29379.6	1.78682	21.3687	1.3606	0.0451568	1.58556	0.00704227	0.810981	0.511479	45.2383	0.36559	44.8463	0.695592	23.958	NA	45.234	0.366		-0.89	concordant
Spot 36	200.693	246.501	4355.23	1.02957	16.8633	3.25008	0.0553746	3.47825	0.00713843	1.05299	0.302736	45.8538	0.481124	54.7249	1.85309	462.701	73.5103	45.739	0.481		18.1	discord.
Spot 89	177.225	202.952	3054.32	1.61883	20.9894	3.4009	0.0423549	3.61148	0.00715967	1.19265	0.330238	45.9897	0.546543	42.1206	1.49006	NA	NA	45.929	0.546		-8.98	rev discord.
Spot 120	608.359	691.239	9262.94	1.72494	21.3678	1.76978	0.0456439	2.34269	0.00728829	1.5324	0.654121	46.813	0.714764	45.3194	1.03835	NA	NA	46.75	0.714		-3.32	rev discord.
Spot 99	258.758	302.883	13708.3	1.3781	20.6672	2.3868	0.0480779	2.65455	0.00733134	1.16143	0.437526	47.0884	0.544908	47.6803	1.23644	77.5222	56.7121	47.089	0.545		1.28	concordant
Spot 85	1173.01	1279.38	156889	2.59144	20.8678	1.35015	0.0486166	1.84219	0.00734562	1.25323	0.680297	47.1798	0.589116	48.2021	0.867225	99.3489	31.9308	47.178	0.589		2.19	concordant
Spot 91	1490.84	2007.2	24465.2	0.678507	19.4718	1.28399	0.0538002	1.86636	0.0076602	1.34809	0.722314	49.1926	0.660639	53.209	0.967497	238.042	29.7678	48.951	0.66		8.07	discord.
Spot 307	289.11	316.897	8503.25	2.44509	14.798	3.3388	0.0765667	3.78141	0.00842226	1.22072	0.322821	54.066	0.657235	74.9119	2.73076	804.263	74.9405	53.587	0.655		33.7	discord.
Spot 285	348.797	377.799	36372.3	2.82625	20.9595	1.73993	0.0605979	1.95577	0.00925894	0.888475	0.454283	59.4123	0.525438	59.7379	1.13463	72.7883	41.4047	59.414	0.525		0.563	concordant
Spot 16	453.397	491.855	25331.3	2.77046	20.3919	1.40373	0.062897	1.70901	0.00934412	0.964464	0.56434	59.9564	0.575577	61.9365	1.02687	139.173	33.1336	59.948	0.576		3.35	concordant
Spot 174	1171.17	1327.75	119982	1.75769	21.0446	1.05849	0.0647201	1.69074	0.00986388	1.31736	0.77916	63.2751	0.82948	63.6767	1.04354	78.7728	25.1701	63.288	0.829		0.652	concordant
Spot 263	188.89	207.064	3689.89	2.44253	21.3392	2.32165	0.0609544	2.60831	0.0102597	1.16636	0.447171	65.8016	0.763578	60.0791	1.52159	NA	NA	65.596	0.761		-9.38	rev discord.
Spot 212	463.953	513.847	62848	2.18522	20.7629	1.50542	0.077221	1.89049	0.011645	1.1433	0.604764	74.6349	0.84838	75.5288	1.37605	103.889	35.5789	74.645	0.848		1.23	concordant
Spot 2	633.069	704.331	102572	2.08768	17.8751	1.37469	0.0948802	1.97922	0.0122655	1.42389	0.719422	78.5876	1.11221	92.0394	1.74154	456.44	30.5015	77.021	1.108		16.7	discord.
Spot 46	2916.9	3094.48	2.06765e+06	3.86001	20.9814	0.886668	0.079555	1.59237	0.0120585	1.32268	0.830632	77.2692	1.01592	77.7265	1.19151	91.7871	21.0155	77.296	1.016		0.613	concordant
Spot 135	2357.98	2827.49	70264.4	1.18022	20.9251	0.943809	0.0804422	1.34267	0.0122101	0.946567	0.70499	78.2345	0.736066	78.5606	1.01504	88.5145	22.5616	78.244	0.736		0.432	concordant
Spot 155	2009.62	2423.91	88757.2	1.13994	20.9433	0.950051	0.0829487	1.72311	0.0125993	1.43607	0.833418	80.7132	1.15187	80.9134	1.34012	86.8521	22.5767	80.728	1.151		0.258	concordant
Spot 240	1631.32	1776.15	159009	2.64694	21.0648	0.96975	0.0835334	1.51854	0.0127097	1.16853	0.769511	81.4155	0.945385	81.4615	1.18871	82.789	23.0028	81.418	0.945		0.0588	concordant
Spot 273	1877.12	2237.57	172161	1.22381	20.6573	0.878253	0.0851008	1.70841	0.0127007	1.46534	0.857721	81.3583	1.18469	82.9293	1.36046	128.433	20.6608	81.419	1.187		1.99	concordant
Spot 221	1746.93	1932.16	77448.9	2.21631	20.5487	0.889217	0.085623	1.51514	0.01276	1.22141	0.806138	81.7358	0.99203	83.4178	1.21337	131.839	21.0919	81.775	0.993		2.12	concordant
Spot 114	1564.62	1738.03	41264.6	2.12024	20.6632	1.04458	0.0861168	1.5921	0.0129399	1.19727	0.752004	82.8811	0.985958	83.8795	1.28178	112.399	24.7679	82.91	0.986		1.25	concordant
Spot 274	1193.91	1313.93	155967	2.33772	21.2178	0.863838	0.0848534	1.46373	0.0130105	1.1816	0.807252	83.3304	0.978297	82.6977	1.16249	64.4648	20.5833	83.277	0.976		-0.794	concordant
Spot 66	1184	1350.37	57718.5	1.67233	20.7836	1.09341	0.0869017	1.72067	0.0131518	1.32816	0.771884	84.2295	1.11143	84.613	1.3969	95.4538	25.8923	84.247	1.111		0.473	concordant
Spot 272	349.661	394.694	154427	1.82468	19.899	1.84497	0.0920818	2.05627	0.0132456	0.907921	0.441537	84.826	0.765108	89.4408	1.76048	214.407	42.7444	84.804	0.765		5.53	discord.
Spot 27	1301.03	1413.59	23428.7	2.71628	21.0425	1.04072	0.0862235	1.6614	0.0132553	1.29427	0.779024	84.8878	1.09147	83.9793	1.33909	58.2433	24.8211	84.819	1.089		-1.12	concordant
Spot 50	629.335	735.694	62474.1	1.39052	20.9633	1.39969	0.087164	1.95209	0.0132795	1.35765	0.695485	85.0414	1.14699	84.858	1.58918	79.6766	33.2992	85.035	1.146		-0.225	concordant
Spot 4	288.928	363.757	14638.6	0.907374	19.9076	1.58201	0.0907458	1.84798	0.0132981	0.94262	0.510081	85.1601	0.797457	88.1979	1.5611	171.185	37.1032	85.158	0.798		3.66	concordant
Spot 292	257.855	319.4	7169.55	0.984568	19.7618	1.75082	0.0892861	1.96604	0.0133013	0.781588	0.397545	85.1806	0.661382	86.8381	1.6363	132.626	42.3961	85.185	0.661		2.01	concordant
Spot 266	1335.33	1478.46	349440	2.19244	20.2523	1.27124	0.0911997	1.64287	0.0133313	1.04061	0.633413	85.3712	0.882528	88.6203	1.39419	177.01	29.643	85.363	0.883		3.9	discord.
Spot 37	776.806	916.823	53145.4	1.30376	20.9286	1.03613	0.0879206	1.42441	0.013348	0.969944	0.680942	85.4778	0.823614	85.5645	1.16885	88.0059	24.7088	85.481	0.823		0.106	concordant
Spot 211	722.183	827.655	44224	1.60909	20.1828	1.32091	0.090896	2.10675	0.0133491	1.63273	0.774998	85.4842	1.38651	88.3377	1.7824	166.117	31.1033	85.488	1.389		3.43	concordant
Spot 171	987.752	1149.32	106571	1.43668	20.8531	1.19242	0.088691	1.65173	0.0134094	1.14065	0.690578	85.8683	0.972961	86.2832	1.3663	97.8025	28.2942	85.88	0.973		0.502	concordant
Spot 183	2818.58	3034.69	68151.5	3.06485	20.6329	0.830776	0.0897606	1.40075	0.0134351	1.12766	0.805038	86.0318	0.963698	87.2803	1.17151	121.584	19.5767	86.08	0.964		1.5	concordant
Spot 158	475.005	531.063	64365.2	1.99127	20.8829	1.54972	0.0886929	2.00929	0.0134427	1.27046	0.632294	86.0801	1.08635	86.2851	1.6621	91.955	36.8796	86.085	1.086		0.248	concordant
Spot 298	1226.38	1243	97535.9	17.347	21.0366	0.883984	0.0882008	1.52201	0.0134642	1.23891	0.813992	86.2166	1.06103	85.826	1.2526	74.954	21.0231	86.184	1.059		-0.474	concordant		high U/Th
Spot 186	856.984	1021.9	66168.7	1.22116	21.0047	1.15728	0.0883584	1.59809	0.0134669	1.10186	0.689488	86.234	0.943854	85.973	1.31737	78.7098	27.4672	86.224	0.943		-0.316	concordant
Spot 302	960.893	1119.64	381747	1.42245	20.7261	1.17947	0.0897015	1.60628	0.0134713	1.0904	0.678838	86.2618	0.934337	87.2253	1.34259	113.698	27.8237	86.282	0.934		1.16	concordant
Spot 164	630.563	714.769	171076	1.75976	20.9638	1.31808	0.0888772	2.27425	0.0134938	1.85316	0.814844	86.4051	1.59054	86.4569	1.88487	87.9089	31.257	86.409	1.589		0.0625	concordant
Spot 303	550.02	605.786	14984.9	2.31781	20.2755	1.14292	0.0901321	1.72492	0.0135004	1.28698	0.746106	86.4471	1.10513	87.6264	1.44811	119.85	27.076	86.48	1.106		1.41	concordant
Spot 193	1379.42	1548.97	27581.1	1.91182	20.0411	0.841124	0.0933198	1.37931	0.0136531	1.09205	0.791732	87.4179	0.9482	90.5912	1.19542	174.984	19.6699	87.411	0.95		3.72	discord.
Spot 249	635.818	728.299	36099.8	1.61564	20.9849	1.42418	0.0898175	2.08677	0.0136902	1.5238	0.730219	87.6539	1.32663	87.3333	1.74627	78.5565	33.8578	87.638	1.325		-0.382	concordant
Spot 78	355.225	376.688	50632.4	3.88935	20.6889	1.51636	0.0909584	1.91712	0.0136901	1.17128	0.610957	87.6531	1.01971	88.3958	1.62299	108.474	35.843	87.666	1.02		0.88	concordant
Spot 18	716.685	878.366	56471.8	1.04168	20.9372	1.21687	0.0904954	1.79417	0.0137149	1.31453	0.732666	87.8109	1.14647	87.9647	1.5118	92.127	28.9106	87.817	1.146		0.183	concordant
Spot 262	1946.91	2253.78	1.63169e+06	1.49092	20.9128	0.604095	0.0909834	1.28699	0.0137084	1.13641	0.882994	87.7698	0.990663	88.4191	1.08981	105.96	14.2638	87.838	0.99		0.771	concordant
Spot 269	760.328	858.18	1.05898e+06	1.82601	20.8949	1.01011	0.0910833	1.6875	0.0137335	1.35179	0.801061	87.9292	1.18055	88.512	1.4304	104.253	23.8985	87.961	1.18		0.689	concordant
Spot 162	779.97	931.813	169486	1.20713	19.9868	1.49647	0.0953383	1.83943	0.0137847	1.06961	0.581489	88.2552	0.937551	92.4641	1.62567	202.461	34.7521	88.229	0.938		4.87	discord.
Spot 11	862.761	980.704	21306	1.71905	20.6913	1.04849	0.0918222	2.20082	0.0138844	1.93472	0.879092	88.8891	1.70795	89.1994	1.87936	97.5317	24.8253	88.926	1.705		0.365	concordant
Spot 230	1515.22	1726.37	197945	1.68638	20.0026	0.741416	0.0969757	1.16192	0.0140096	0.894623	0.769951	89.685	0.796788	93.9808	1.04297	204.456	17.2271	89.61	0.799		4.9	discord.
Spot 3	240.356	272.603	10264.2	1.7516	20.5371	1.82702	0.0918033	2.72104	0.0140145	1.32089	0.485438	89.7161	1.17685	89.1818	2.32316	74.9033	56.5353	89.709	1.176		-0.624	concordant
Spot 235	850.724	1017.65	132593	1.19765	20.1306	1.26531	0.0963639	1.75551	0.0140181	1.21683	0.693151	89.7389	1.08441	93.4144	1.56672	188.298	29.4544	89.722	1.086		4.2	discord.
Spot 128	582.672	647.011	40260.8	2.12822	21.0915	1.34613	0.091662	1.99683	0.0140808	1.4236	0.712933	90.1378	1.27428	89.0504	1.70244	59.9875	33.3957	90.078	1.272		-1.27	concordant
Spot 75	287.508	318.386	18673.3	2.1881	20.6574	1.58295	0.0928264	1.95773	0.0140933	0.798453	0.407847	90.2172	0.715324	90.1329	1.68851	87.9254	42.3686	90.216	0.715		-0.0976	concordant
Spot 180	818.88	910.235	16101.7	2.10648	20.6713	1.14841	0.0930867	1.75423	0.014165	1.32584	0.755795	90.6728	1.19376	90.3747	1.51688	82.4888	27.27	90.656	1.192		-0.344	concordant
Spot 9	1076.49	1258.29	57619.7	1.39151	20.5208	1.21747	0.0955839	1.66191	0.0141758	1.13069	0.680353	90.7413	1.01881	92.6918	1.47224	143.212	28.5822	90.767	1.019		2.22	concordant
Spot 7	214.915	256.804	28711.8	1.20567	20.4672	1.69089	0.0956305	1.93637	0.0142589	0.941886	0.486418	91.2694	0.853597	92.7349	1.71614	130.626	39.7849	91.279	0.854		1.67	concordant
Spot 141	274.138	307.581	7933.6	1.92636	21.3473	1.75412	0.0891362	1.99476	0.0142971	0.945251	0.473868	91.5126	0.858913	86.6984	1.65765	NA	NA	91.362	0.857		-5.64	rev discord.
Spot 103	172.83	194.683	6345.99	1.85853	20.8618	2.46166	0.0905978	3.64144	0.0143224	0.803673	0.220702	91.6731	0.731538	88.0601	3.07155	NA	NA	91.657	0.731		-4.2	rev discord.
Spot 300	129.274	141.035	3637.59	2.58306	21.1449	2.64282	0.085631	3.6269	0.014347	1.07614	0.296712	91.8297	0.981214	83.4253	2.9048	NA	NA	91.693	0.98		-10	rev discord.
Spot 118	1584.53	1895.6	201671	1.19706	20.7197	0.987477	0.0957248	1.61218	0.0143407	1.27405	0.790266	91.7893	1.16116	92.8223	1.4301	119.454	23.2805	91.836	1.161		1.17	concordant
Spot 247	392.852	432.951	264781	2.30227	20.3237	1.43813	0.0985476	1.73832	0.014431	0.976494	0.561746	92.3634	0.895492	95.4347	1.58339	172.865	33.5635	92.369	0.896		3.42	concordant
Spot 32	1047.91	1194.66	63404.6	1.67808	21.0267	0.955286	0.095083	1.44514	0.0144838	1.07949	0.746984	92.6986	0.993514	92.2274	1.27407	80.0317	22.8238	92.671	0.992		-0.533	concordant
Spot 153	569.021	632.216	114777	2.11598	20.6363	1.37764	0.0972544	1.74783	0.0145266	1.07563	0.615412	92.9711	0.992852	94.2388	1.57301	126.469	32.4291	92.99	0.993		1.42	concordant
Spot 201	252.336	290.193	99703.5	1.5664	19.7197	1.35712	0.10188	1.68275	0.0145808	0.994893	0.59123	93.3152	0.9217	98.5106	1.57982	226.169	31.3679	93.265	0.923		5.68	discord.
Spot 34	486.115	531.678	53116.7	2.50724	20.6514	1.64489	0.0975686	2.1317	0.0146021	1.34101	0.629078	93.4506	1.24414	94.5295	1.92413	121.856	39.0488	93.47	1.244		1.2	concordant
Spot 119	1794.45	2081.43	55168.6	1.46944	20.4141	0.991766	0.0991834	1.75575	0.0146936	1.44876	0.825153	94.0319	1.35241	96.0223	1.60865	145.765	23.2649	94.105	1.354		2.19	concordant
Spot 191	1168.86	1416.12	29710.3	1.11086	20.4018	0.830791	0.0989104	1.15893	0.0147229	0.807463	0.696732	94.2179	0.755242	95.77	1.05917	134.576	19.517	94.251	0.756		1.71	concordant
Spot 126	619.125	719.633	39413.9	1.44759	20.5474	1.45432	0.0985928	1.85676	0.0147302	1.14344	0.615826	94.2643	1.07001	95.4765	1.69197	125.887	34.4296	94.284	1.07		1.34	concordant
Spot 295	782.664	874.746	190430	1.99741	20.8937	1.22437	0.0973966	1.66988	0.0147438	1.13551	0.679997	94.3508	1.06356	94.3703	1.50486	94.8727	28.9782	94.351	1.063		0.0217	concordant
Spot 129	335.441	382.977	17007	1.65828	20.5216	1.62138	0.0979353	2.09966	0.0147784	0.978516	0.466035	94.5707	0.918635	94.8687	1.9017	102.356	43.9275	94.574	0.919		0.329	concordant
Spot 194	656.601	734.105	264845	1.9909	21.19	1.35783	0.0968365	1.78002	0.01484	1.15092	0.646578	94.9619	1.08493	93.852	1.59571	65.7264	32.3525	94.918	1.083		-1.23	concordant
Spot 47	1072.91	1170.92	49506.7	2.57265	20.4291	1.06795	0.100113	1.73097	0.0148634	1.35979	0.785565	95.1104	1.28381	96.881	1.59946	140.706	25.1239	95.169	1.285		1.93	concordant
Spot 83	524.152	645.191	10204.5	1.01766	12.771	5.39148	0.160115	5.53497	0.015044	1.22852	0.221956	96.2578	1.17376	150.804	7.75684	1126.15	107.642	95.597	1.171		47.7	discord.
Spot 172	259.599	287.509	44829.4	2.18582	20.7196	1.87062	0.0993588	2.13358	0.0149853	1.02567	0.480728	95.8846	0.976184	96.1843	1.95797	103.632	44.2233	95.888	0.976		0.327	concordant
Spot 314	1178.02	1322.91	350680	1.91069	20.8342	1.02058	0.100115	1.65851	0.0151302	1.30729	0.788232	96.805	1.25607	96.8829	1.53254	98.7787	24.1294	96.81	1.255		0.0843	concordant
Spot 219	516.735	562.801	39758.6	2.63609	20.6404	0.986801	0.100848	1.77814	0.015153	1.4773	0.830812	96.9499	1.42152	97.5591	1.65401	112.468	23.3487	96.997	1.421		0.657	concordant
Spot 181	362.038	410.983	20178.3	1.73827	20.8229	1.61013	0.0998952	1.86326	0.0152548	0.937292	0.503038	97.596	0.90787	96.6796	1.7183	74.1154	38.2901	97.579	0.907		-0.989	concordant
Spot 257	844.643	937.224	168992	2.14396	21.31	1.23979	0.0996346	1.63651	0.015333	1.06818	0.652721	98.0925	1.03988	96.439	1.5056	55.718	29.5832	98.015	1.038		-1.78	rev discord.
Spot 256	453.635	481.146	20626.2	3.875	20.6035	1.48392	0.10166	1.8952	0.0153236	1.14993	0.606758	98.0329	1.11878	98.3073	1.77577	104.945	35.6271	98.039	1.118		0.293	concordant
Spot 167	392.415	454.109	10638.5	1.49477	19.3107	3.02784	0.106926	3.21955	0.0153363	1.09415	0.339846	98.1135	1.06538	103.15	3.15785	221.095	70.07	98.106	1.066		5.26	discord.
Spot 184	338.598	374.111	13203.9	2.24059	20.7543	1.65175	0.100565	1.98885	0.015441	1.0665	0.536238	98.7782	1.04544	97.2976	1.84528	61.1369	39.9827	98.742	1.044		-1.58	concordant
Spot 284	840.267	954.694	67358.4	1.72566	20.3891	1.31037	0.105129	1.70377	0.0155415	1.07638	0.631763	99.4165	1.06189	101.5	1.6457	150.723	30.9496	99.444	1.062		2.18	concordant
Spot 270	542.304	649.146	45712.6	1.19281	20.7287	1.05168	0.103332	1.64666	0.0155584	1.26505	0.768252	99.5235	1.24935	99.8475	1.56589	107.614	24.9005	99.542	1.248		0.341	concordant
Spot 55	573.142	623.657	94958.2	2.66632	20.3859	1.07428	0.105165	1.66478	0.0155534	1.26961	0.76263	99.4919	1.25346	101.533	1.60855	149.737	25.239	99.549	1.255		2.13	concordant
Spot 145	461.454	544.208	15855.1	1.3104	19.5686	1.71665	0.108323	2.01559	0.0155694	0.955807	0.474208	99.5932	0.944604	104.43	2.00025	216.257	41.0906	99.581	0.945		4.98	discord.
Spot 291	698.37	775.345	5740.12	2.13207	12.8927	7.48853	0.163705	7.87065	0.0157688	2.41516	0.306857	100.859	2.41695	153.941	11.2429	1076.39	150.586	99.609	2.406		45	discord.
Spot 101	558.718	626.908	3.19476e+06	1.92547	20.8983	0.990382	0.103302	1.6129	0.0155795	1.27302	0.789276	99.6579	1.25891	99.8198	1.53339	103.694	23.4347	99.669	1.257		0.17	concordant
Spot 232	611.726	668.426	59793	2.53538	20.6186	1.30532	0.104536	1.92402	0.0156232	1.41289	0.734345	99.9353	1.40109	100.955	1.84896	125.077	30.7688	99.973	1.401		1.07	concordant
Spot 5	599.807	660.733	36627.5	2.31354	20.4562	1.32444	0.105792	1.88357	0.0157293	1.3333	0.707858	100.609	1.33101	102.109	1.82975	137.285	31.2567	100.649	1.331		1.55	concordant
Spot 246	328.16	371.402	34441.4	1.7834	20.5079	1.38006	0.106015	1.75448	0.0157861	1.05617	0.601983	100.969	1.05809	102.314	1.7076	133.773	32.9234	100.991	1.058		1.39	concordant
Spot 108	905.77	1041.97	114989	1.56284	20.8704	1.03216	0.105079	1.68413	0.0158558	1.33027	0.789884	101.411	1.33849	101.454	1.62604	102.465	24.4432	101.414	1.337		0.0444	concordant
Spot 304	334.884	371.078	11614.1	2.17439	20.7502	1.3246	0.103054	1.65886	0.0159017	0.938546	0.565776	101.702	0.947033	99.5913	1.57365	49.3226	32.6661	101.633	0.946		-2.2	rev discord.
Spot 301	323.826	369.892	38686.7	1.65194	20.386	1.53212	0.106899	1.74615	0.0159013	0.836433	0.479016	101.7	0.843978	103.125	1.71229	136.145	35.9941	101.712	0.844		1.46	concordant
Spot 92	826.89	929.596	18159	1.89199	12.4804	5.23579	0.175955	5.36908	0.0160256	1.16115	0.216266	102.489	1.18064	164.574	8.15737	1187.88	103.59	101.76	1.177		50.5	discord.
Spot 6	682.093	743.279	198377	2.61975	20.7031	1.15889	0.106926	1.66674	0.0159819	1.19774	0.71861	102.211	1.21457	103.149	1.63479	124.849	27.2922	102.245	1.214		0.96	concordant
Spot 185	323.104	358.638	105125	2.1368	20.7426	1.75003	0.106463	1.94896	0.0159953	0.85782	0.440142	102.296	0.87059	102.725	1.90413	112.706	41.2787	102.3	0.87		0.44	concordant
Spot 170	277.688	315.604	14893.5	1.72109	19.4528	1.6628	0.111636	1.94878	0.0160071	0.993003	0.509551	102.371	1.00852	107.461	1.98717	221.822	38.8036	102.356	1.009		5.11	discord.
Spot 287	1077.81	1263.02	88908.8	1.36755	20.7489	1.05366	0.10631	1.60118	0.0160028	1.2028	0.751193	102.344	1.22127	102.584	1.56232	108.163	24.9757	102.357	1.22		0.247	concordant
Spot 140	755.521	833.982	16893	2.26288	17.8875	2.88336	0.122342	3.20042	0.0160359	1.14467	0.357661	102.554	1.16461	117.193	3.54233	425.664	66.6994	102.37	1.165		14.1	discord.
Spot 49	399.268	482.741	44224.1	1.12405	21.1078	1.2436	0.105236	1.57475	0.0161774	0.942069	0.598234	103.451	0.966806	101.598	1.52248	58.3662	30.0897	103.382	0.965		-1.9	rev discord.
Spot 122	310.067	332.245	9158.39	3.28547	20.3386	1.499	0.107098	1.84833	0.0162381	1.05433	0.570422	103.836	1.08601	103.307	1.81553	91.1229	35.9733	103.823	1.085		-0.537	concordant
Spot 289	730.93	782.731	164685	3.31594	20.0966	1.46411	0.112236	1.98845	0.0163366	1.34544	0.676631	104.462	1.39415	108.009	2.03741	186.923	34.0752	104.485	1.396		3.52	concordant
Spot 82	1145.53	1363.03	245353	1.2377	20.5906	0.769752	0.109783	1.44298	0.0163653	1.22044	0.845778	104.644	1.2668	105.766	1.44939	131.119	18.1077	104.738	1.267		1.12	concordant
Spot 84	229.663	266.249	11810	1.47514	21.29	2.00256	0.103763	2.22514	0.0164009	0.905797	0.407073	104.87	0.94222	100.244	2.124	NA	NA	104.775	0.941		-4.74	rev discord.
Spot 88	2265.23	2292.34	34475.4	19.6395	20.2635	0.610607	0.111264	1.20814	0.0164461	1.04246	0.862864	105.156	1.08732	107.121	1.22825	151.038	14.2854	105.297	1.089		1.95	concordant		high U/Th
Spot 157	1214.58	1372.84	105612	1.80353	20.6995	0.607818	0.109904	1.18525	0.0164896	1.01676	0.857847	105.432	1.06327	105.878	1.1917	115.905	14.352	105.483	1.062		0.445	concordant
Spot 136	353.839	419.001	18228.2	1.27609	19.3083	1.83559	0.117489	2.20252	0.016642	1.21622	0.552194	106.398	1.28342	112.793	2.35129	249.933	42.2821	106.349	1.285		6.16	discord.
Spot 187	269.831	300.976	25278.8	2.03597	19.9195	1.59471	0.11489	1.81468	0.0167221	0.859057	0.473394	106.906	0.910811	110.429	1.89881	187.054	37.1986	106.916	0.911		3.42	concordant
Spot 38	981.924	1123.39	31737.6	1.6311	20.5589	1.25632	0.112976	1.95633	0.0169125	1.49231	0.762811	108.113	1.59993	108.684	2.01638	121.227	29.7889	108.146	1.599		0.554	concordant
Spot 95	220.708	264.652	19338.2	1.18029	18.8891	2.45494	0.12231	2.60918	0.016929	0.864225	0.331225	108.218	0.92744	117.164	2.88724	302.9	56.1157	108.177	0.928		8.39	discord.
Spot 44	517.869	568.992	120871	2.38051	20.3808	1.10448	0.115015	1.55672	0.0169565	1.09677	0.70454	108.392	1.17888	110.542	1.63048	157.101	25.8585	108.444	1.18		2.07	concordant
Spot 48	780.124	937.35	295673	1.16603	21.0042	1.11723	0.111823	1.7018	0.0169831	1.28368	0.754306	108.561	1.38191	107.631	1.73793	87.1283	26.4959	108.49	1.378		-0.906	concordant
Spot 282	250.445	300.557	265899	1.17446	17.9872	2.38554	0.131455	2.58813	0.0170684	1.0038	0.387846	109.102	1.08594	125.404	3.05321	446.695	53.0454	108.845	1.086		14.8	discord.
Spot 197	346.623	384.312	9969.52	2.16128	21.1878	1.12513	0.108287	1.57367	0.017113	1.05473	0.670237	109.384	1.14397	104.397	1.56123	NA	NA	108.95	1.137		-4.91	rev discord.
Spot 65	204.275	230.68	1.17757e+06	1.81802	20.2311	2.43714	0.116601	2.62487	0.0170906	0.97483	0.371382	109.242	1.05596	111.986	2.7832	170.697	56.9097	109.251	1.056		2.62	concordant
Spot 255	286.689	310.733	26427.1	2.802	20.3464	1.39585	0.115466	1.75316	0.0171285	1.05411	0.601263	109.482	1.14432	110.953	1.84268	142.633	32.862	109.509	1.144		1.41	concordant
Spot 109	208.207	238.133	13760.8	1.63503	20.4794	2.29701	0.113605	2.69297	0.0171527	0.9461	0.351322	109.636	1.0285	109.258	2.78953	101.007	59.6443	109.633	1.028		-0.364	concordant
Spot 196	399.923	441.362	105926	2.26798	18.4238	1.78779	0.129175	2.04062	0.0172367	0.983765	0.482092	110.168	1.07459	123.356	2.37033	385.671	40.1622	109.9	1.075		12	discord.
Spot 258	157.491	177.815	11442	1.82103	19.7499	2.23502	0.11812	2.53803	0.017259	1.16506	0.45904	110.309	1.27423	113.366	2.72246	178.006	52.5566	110.323	1.275		2.89	concordant
Spot 137	369.73	403.518	51277.9	2.57151	19.6259	1.51461	0.121714	1.8019	0.0173489	0.972751	0.539847	110.879	1.06936	116.625	1.98527	235.523	34.9826	110.861	1.07		5.34	discord.
Spot 72	805.646	924.046	20081.3	1.59904	19.4799	1.01797	0.121461	1.43426	0.0173531	1.01011	0.704278	110.906	1.11069	116.395	1.57728	230.119	23.5164	110.876	1.113		5.11	discord.
Spot 144	215.991	231.358	6729.97	3.30291	20.9673	1.72851	0.110279	2.1172	0.017481	1.14967	0.543016	111.716	1.2733	106.221	2.13528	NA	NA	111.454	1.269		-5.31	rev discord.
Spot 280	921.171	1009.73	199511	2.44451	20.4336	0.914646	0.119486	1.25386	0.0176336	0.857662	0.684017	112.683	0.958041	114.606	1.35887	154.754	21.4015	112.733	0.958		1.79	concordant
Spot 160	378.411	439.45	54058.4	1.45687	21.4634	1.42964	0.114267	1.64088	0.0178159	0.789343	0.48105	113.838	0.890682	109.861	1.70859	24.4846	NA	113.724	0.889		-3.75	rev discord.
Spot 100	167.36	192.456	5449.46	1.56717	20.5169	1.69029	0.113988	2.12711	0.0178656	1.24662	0.586061	114.152	1.41051	109.607	2.21003	11.9279	NA	113.91	1.406		-4.29	rev discord.
Spot 248	650.101	713.477	33457.5	2.41061	20.7155	1.14555	0.119262	1.79112	0.0179547	1.37474	0.767531	114.716	1.56311	114.402	1.93787	107.894	27.1214	114.692	1.56		-0.29	concordant
Spot 275	133.254	155.26	5969.78	1.42296	19.6515	2.40996	0.121041	3.22051	0.018044	1.07909	0.335068	115.282	1.23294	116.015	3.53075	131.088	71.3664	115.286	1.233		0.671	concordant
Spot 207	208.493	234.485	19093.7	1.88504	20.8477	1.34302	0.118095	1.80361	0.0180972	1.04503	0.579409	115.619	1.19748	113.343	1.9343	65.8304	35.0029	115.532	1.195		-2.1	rev discord.
Spot 67	350.649	394.089	16783.8	1.89692	14.5491	4.4198	0.180296	5.69499	0.0192395	3.58713	0.629875	122.848	4.36499	168.315	8.83341	867.502	91.7539	117.268	4.308		34.3	discord.
Spot 261	1238.56	1374.47	82295.1	2.14164	20.5615	0.813227	0.123541	1.37127	0.0183652	1.09954	0.801837	117.316	1.27827	118.277	1.531	137.65	19.2512	117.388	1.277		0.863	concordant
Spot 25	339.884	389.415	14121	1.61258	20.3787	1.1589	0.123017	1.51009	0.0184649	0.967144	0.640453	117.947	1.13035	117.804	1.67963	114.883	27.359	117.942	1.129		-0.129	concordant
Spot 168	217.307	243.31	12832	1.9639	18.7162	1.80042	0.134294	2.15873	0.0185657	1.18643	0.549599	118.585	1.39407	127.949	2.59513	305.57	41.097	118.46	1.396		8.08	discord.
Spot 198	103.709	113.598	57425.7	2.46448	18.6871	2.87178	0.137216	3.05628	0.0186128	1.04507	0.341942	118.883	1.23102	130.561	3.74444	348.716	64.9272	118.81	1.232		9.96	discord.
Spot 40	93.3965	101.963	4799.45	2.56205	20.9437	3.24591	0.115758	3.46198	0.0186927	1.13243	0.327105	119.388	1.33955	111.219	3.64701	NA	NA	119.243	1.337		-7.49	rev discord.
Spot 121	272.292	317.189	61837.6	1.42523	20.3932	1.5614	0.126482	1.86583	0.0187073	1.01854	0.54589	119.481	1.20575	120.931	2.12719	149.574	36.6213	119.505	1.206		1.28	concordant
Spot 81	729.922	866.484	44339.7	1.25607	17.8692	1.3663	0.145127	1.77197	0.0188626	1.10458	0.623364	120.464	1.31826	137.6	2.28024	444.458	30.8233	119.579	1.32		14.2	discord.
Spot 288	1097.62	1112.69	1.94101e+06	17.1125	12.372	1.15456	0.291943	2.15987	0.026116	1.82539	0.845138	166.194	2.99491	260.088	4.95583	1223.26	22.7013	121.373	2.663		60.5	discord.		high U/Th
Spot 188	207.216	233.633	176718	1.84338	20.7075	1.87709	0.128831	2.15199	0.0193003	1.05242	0.489046	123.232	1.28461	123.047	2.49382	119.474	44.2459	123.229	1.284		-0.16	concordant
Spot 312	378.44	420.301	23941.1	2.12449	19.7775	1.64884	0.133083	2.17481	0.0193104	1.39773	0.642692	123.296	1.70698	126.865	2.59367	194.27	38.7441	123.349	1.709		3.03	concordant
Spot 111	241.279	269.831	11574.7	1.98591	20.0454	1.82108	0.137215	2.02905	0.0203544	0.88636	0.436835	129.895	1.13982	130.561	2.4859	142.676	42.8327	129.904	1.14		0.544	concordant
Spot 222	195.778	216.414	92630.2	2.22952	19.3781	1.54573	0.151847	1.74157	0.021322	0.802321	0.460688	136.006	1.07977	143.542	2.33122	269.965	35.4387	136.001	1.081		5.77	discord.
Spot 296	254.25	288.831	35038.9	1.72777	20.8366	1.46087	0.140385	1.74157	0.0213462	0.94708	0.543809	136.159	1.27601	133.387	2.17691	84.2826	34.6759	136.057	1.274		-2.19	rev discord.
Spot 237	1003.17	1061.1	31915.9	4.06954	18.7936	1.37559	0.157444	1.93664	0.0215202	1.36252	0.703546	137.257	1.85038	148.463	2.67489	331.4	31.1918	136.958	1.858		8.43	discord.
Spot 148	302.247	344.16	37717.5	1.69465	19.9587	1.20338	0.148274	1.56245	0.0215093	0.992837	0.635437	137.188	1.34766	140.387	2.04859	194.841	28.0583	137.259	1.348		2.46	concordant
Spot 110	975.412	1063.18	43702.2	2.61183	20.3491	0.947792	0.148257	1.65426	0.021906	1.35152	0.816997	139.69	1.86764	140.371	2.16874	151.915	22.3436	139.767	1.863		0.52	concordant
Spot 150	253.706	292.653	22684.4	1.5308	20.6619	1.58352	0.146557	1.86323	0.0221575	0.922941	0.495345	141.277	1.28972	138.867	2.41829	97.8996	38.2815	141.21	1.288		-1.84	rev discord.
Spot 29	310	327.658	11707.3	4.12565	20.4933	1.49938	0.146415	1.79029	0.0222042	0.938848	0.52441	141.571	1.31465	138.742	2.32166	90.614	36.1436	141.476	1.312		-2.16	rev discord.
Spot 218	203.398	233.027	25070.4	1.61327	20.3373	1.42562	0.151314	1.7372	0.0224869	0.980092	0.564178	143.354	1.38949	143.071	2.31828	138.38	33.6897	143.345	1.388		-0.211	concordant
Spot 19	286.109	340.961	20755.1	1.22578	20.493	1.37736	0.150645	1.67341	0.0225557	0.938011	0.560539	143.788	1.33381	142.481	2.22457	120.756	32.6525	143.742	1.332		-0.977	concordant
Spot 105	284.162	339.278	61529.3	1.21159	20.7347	1.24767	0.150643	1.58733	0.0226272	0.981029	0.618038	144.239	1.39931	142.48	2.11012	113.28	29.4614	144.152	1.396		-1.31	concordant
Spot 58	184.034	204.575	7161.8	2.1055	19.6933	1.52418	0.153139	1.96806	0.0227244	1.24174	0.630949	144.851	1.77863	144.68	2.65384	141.878	35.8406	144.844	1.776		-0.127	concordant
Spot 163	246.905	286.26	71980.4	1.47432	21.2756	1.5736	0.148632	1.87417	0.0229509	1.01581	0.542009	146.279	1.46919	140.704	2.46247	47.6596	37.6482	146.007	1.464		-4.16	rev discord.
Spot 134	299.514	344.79	29100.8	1.5546	20.5276	1.20251	0.1544	1.61499	0.02313	1.04845	0.649201	147.407	1.52796	145.789	2.19326	119.545	28.9529	147.313	1.524		-1.18	concordant
Spot 175	280.614	316.236	41516.6	1.85124	19.8664	1.54253	0.160414	1.99961	0.023183	1.26889	0.634569	147.741	1.85335	151.065	2.80675	203.529	35.8811	147.828	1.854		2.39	concordant
Spot 142	2381.75	3245.2	182272	0.648222	20.5576	0.788075	0.156413	1.35923	0.0232359	1.1073	0.814651	148.075	1.62095	147.558	1.86674	139.26	18.5222	148.003	1.613		-0.376	concordant
Spot 166	51.7004	57.0667	4844.07	2.26402	19.4756	3.33059	0.155773	3.66169	0.0233128	1.03304	0.282121	148.559	1.51712	146.996	5.01111	121.862	82.7829	148.548	1.517		-1.14	concordant
Spot 26	96.2091	104.855	10552.2	2.61506	19.375	2.27846	0.162526	2.61073	0.0233299	1.23016	0.471191	148.667	1.8079	152.912	3.70608	219.212	53.2946	148.705	1.809		3.03	concordant
Spot 132	376.215	449.549	116921	1.20559	20.1276	1.11741	0.160612	1.48679	0.0234071	0.979528	0.65882	149.153	1.44422	151.239	2.08916	184.04	26.0446	149.232	1.444		1.49	concordant
Spot 179	396.593	426.963	17872.4	3.06879	20.3449	1.48912	0.158757	1.85588	0.023724	1.06981	0.576442	151.149	1.59819	149.615	2.58179	125.345	35.7145	151.087	1.595		-1.1	concordant
Spot 250	294.033	325.787	29857.7	2.17603	19.5993	1.35753	0.167975	1.71845	0.0239561	1.04989	0.610951	152.61	1.58343	157.66	2.50946	234.252	31.3962	152.696	1.585		3.51	concordant
Spot 52	320.464	348.985	40275	2.64048	20.3849	1.45863	0.161618	1.68876	0.0239864	0.843383	0.499409	152.801	1.27354	152.119	2.38576	141.495	34.322	152.784	1.272		-0.481	concordant
Spot 192	931.321	1055.11	261981	1.76804	20.2725	0.9368	0.163695	1.45036	0.0239938	1.1072	0.7634	152.848	1.67243	153.932	2.07157	170.64	21.8796	152.938	1.67		0.76	concordant
Spot 20	339.092	403.829	128858	1.23091	18.5123	1.89335	0.180067	2.13803	0.0240512	0.993144	0.464514	153.209	1.50365	168.118	3.31262	383.469	42.538	153.061	1.506		10	discord.
Spot 90	274.653	292.589	24564.5	3.59857	20.3894	1.26023	0.162788	2.68018	0.0242989	2.36368	0.881911	154.768	3.61465	153.141	3.80994	128.052	29.7278	154.305	3.569		-1.16	concordant
Spot 79	449.023	539.372	54523.7	1.16793	19.4253	2.22704	0.171518	2.60332	0.0242189	1.34746	0.517592	154.264	2.05397	160.735	3.87007	257.164	51.1983	154.31	2.056		4.43	discord.
Spot 24	959.641	1079.72	242745	1.87809	20.2135	1.07234	0.166579	1.56585	0.024273	1.14103	0.7287	154.605	1.74311	156.446	2.27032	184.395	24.9735	154.718	1.742		1.27	concordant
Spot 56	352.444	407.603	29025.1	1.50157	20.5447	0.978883	0.162577	1.35477	0.0244031	0.839425	0.619607	155.424	1.28907	152.957	1.92369	114.865	25.0958	155.285	1.285		-1.72	rev discord.
Spot 299	576.476	724.137	38701.1	0.917458	19.7574	0.942596	0.169402	1.55715	0.0243931	1.2391	0.795752	155.36	1.90206	158.899	2.29041	211.965	21.8522	155.616	1.905		2.43	concordant
Spot 117	701.379	773.218	75905.8	2.29435	19.7585	0.925568	0.171757	1.40552	0.0245943	1.05246	0.748803	156.627	1.62857	160.942	2.09192	224.941	21.5582	156.829	1.631		2.93	concordant
Spot 113	873.617	1026.26	15458.2	1.345	15.7256	4.91694	0.217483	5.15053	0.025031	1.33906	0.259985	159.374	2.10795	199.813	9.34236	708.766	105.837	158.96	2.108		24.7	discord.
Spot 68	232.11	262.061	169991	1.8212	19.9186	1.25427	0.172855	1.42312	0.0249697	0.672352	0.47245	158.988	1.05589	161.893	2.12965	204.62	29.1267	159.029	1.056		1.96	concordant
Spot 217	847.969	1000.33	178894	1.30787	20.431	0.857696	0.169279	1.35537	0.0249921	1.04921	0.77411	159.129	1.64915	158.793	1.99239	153.775	20.0731	159.092	1.643		-0.228	concordant
Spot 30	245.201	273.26	26743	2.0536	19.8072	1.60383	0.173178	1.9677	0.0250004	1.13984	0.579275	159.181	1.79219	162.173	2.94929	206.087	37.2233	159.254	1.792		2.01	concordant
Spot 106	304.195	361.128	48357.3	1.2556	19.8873	1.25166	0.17342	1.5503	0.0250109	0.910834	0.587521	159.247	1.43271	162.382	2.32644	208.328	29.0962	159.325	1.433		2.11	concordant
Spot 74	397.864	485.901	20987	1.06204	19.2783	1.28888	0.177089	1.50738	0.0250192	0.775694	0.514597	159.3	1.22054	165.552	2.30269	255.89	29.7065	159.355	1.222		4.16	discord.
Spot 306	237.527	263.108	13062.8	2.18204	20.5631	1.68998	0.164341	1.93753	0.0250714	0.934589	0.48236	159.628	1.47355	154.496	2.77681	76.4508	40.33	159.447	1.47		-3.52	rev discord.
Spot 22	1346.35	1685.21	54338.2	0.933698	19.9724	0.85656	0.173479	1.38664	0.0250818	1.09026	0.786255	159.693	1.71968	162.434	2.08145	202.568	19.8932	159.917	1.72		1.84	concordant
Spot 203	429.708	480.678	23202.1	1.98118	20.0612	1.05092	0.170974	1.71658	0.0251406	1.35265	0.787991	160.063	2.13843	160.264	2.54494	163.215	24.6871	160.086	2.131		0.136	concordant
Spot 77	94.9571	103.401	7354.69	2.6426	18.3578	2.72237	0.182896	2.96949	0.0252005	1.15723	0.389708	160.44	1.83375	170.549	4.66199	313.181	62.2099	160.439	1.835		6.62	discord.
Spot 57	365.234	400.79	85933.4	2.41389	20.5472	1.25265	0.169399	1.57917	0.0252539	0.961068	0.608592	160.775	1.52605	158.897	2.32277	130.967	29.449	160.679	1.522		-1.27	concordant
Spot 86	228.582	255.721	40736.9	1.9793	18.332	2.32251	0.1904	2.51221	0.0254013	0.950698	0.378431	161.702	1.51818	176.971	4.08002	386.131	52.2255	161.624	1.52		9.8	discord.
Spot 80	1271.97	1459.33	37862.7	1.5954	20.1946	0.905706	0.173182	1.42157	0.0254894	1.09559	0.770689	162.256	1.75548	162.177	2.13077	161.032	21.1696	162.247	1.749		-0.0528	concordant
Spot 146	236.268	295.567	12694.1	0.936321	18.297	1.46549	0.189261	1.96015	0.0255117	1.10878	0.565661	162.396	1.77812	175.999	3.16742	362.869	36.4486	162.264	1.783		8.74	discord.
Spot 28	495.912	551.633	38019.6	2.09146	20.0779	1.11847	0.175387	1.45152	0.025584	0.918926	0.633079	162.851	1.47773	164.083	2.19922	181.878	26.191	162.903	1.477		0.815	concordant
Spot 156	454.715	501.851	39254.2	2.26697	20.4491	0.935502	0.172631	1.30985	0.0257108	0.914341	0.698052	163.648	1.47747	161.7	1.95798	133.267	22.0364	163.483	1.471		-1.29	concordant
Spot 279	628.337	744.097	270336	1.27555	19.1659	1.8181	0.186193	2.35014	0.0257834	1.48914	0.633641	164.104	2.4129	173.376	3.74571	301.815	41.4549	164.151	2.419		5.96	discord.
Spot 14	54.0397	59.0022	15465.6	2.55906	15.933	2.63616	0.224697	3.29538	0.026163	1.82646	0.554248	166.489	3.00193	205.812	6.13917	684.052	58.5737	164.206	3.003		23.3	discord.
Spot 308	259.026	311.762	116196	1.15427	19.2687	1.71555	0.184685	1.90544	0.0258515	0.8292	0.435176	164.532	1.34703	172.084	3.01616	277.222	39.2802	164.565	1.348		4.87	discord.
Spot 61	320.958	361.011	17273.7	1.88315	20.0189	1.2378	0.175873	1.59087	0.0258978	0.998323	0.627534	164.823	1.62461	164.503	2.41604	159.911	28.9586	164.807	1.622		-0.21	concordant
Spot 45	446.841	511.415	97731.3	1.62617	20.1638	1.76356	0.177685	1.98111	0.0259313	0.902495	0.45555	165.033	1.47051	166.066	3.03502	180.795	41.1081	165.051	1.47		0.676	concordant
Spot 130	911.071	994.667	186807	2.56115	20.2242	0.889565	0.177381	1.50635	0.0259506	1.21559	0.806976	165.155	1.9821	165.805	2.30434	175.07	20.7762	165.238	1.975		0.425	concordant
Spot 139	342.182	389.541	50020	1.69796	19.9681	1.41243	0.179804	1.80383	0.0260548	1.11831	0.619966	165.809	1.83062	167.892	2.79136	197.348	32.8851	165.886	1.83		1.35	concordant
Spot 202	579.865	635.548	123193	2.44725	20.2259	0.930755	0.177986	1.72064	0.0261138	1.447	0.840965	166.18	2.37389	166.326	2.63978	168.386	21.7463	166.206	2.361		0.0956	concordant
Spot 123	726.237	810.56	181694	2.02395	20.1907	1.11726	0.179392	1.64334	0.0261592	1.20468	0.733066	166.465	1.97969	167.537	2.53806	182.685	26.0417	166.548	1.976		0.694	concordant
Spot 35	222.503	251.453	60797.3	1.80616	20.5447	1.52699	0.176016	1.7332	0.0262104	0.803366	0.463517	166.787	1.32272	164.626	2.63401	133.675	36.0809	166.732	1.321		-1.41	concordant
Spot 215	357.543	411.707	50414.8	1.55126	20.2583	1.33943	0.17998	1.69448	0.0264595	1.03682	0.611883	168.352	1.72291	168.044	2.62432	163.685	31.3553	168.337	1.72		-0.198	concordant
Spot 216	179.067	231.365	8132.25	0.804625	17.4225	2.69442	0.204511	3.33807	0.0265341	1.12753	0.337778	168.82	1.87878	188.936	5.75487	448.374	69.8211	168.69	1.88		12.3	discord.
Spot 73	239.317	263.053	22267.1	2.36935	20.242	1.32822	0.178919	1.64602	0.0265386	0.966157	0.586966	168.848	1.61016	167.13	2.53652	142.857	31.2687	168.767	1.607		-1.11	concordant
Spot 200	704.34	766.279	189002	2.67231	20.6475	0.562344	0.178804	1.21578	0.0267589	1.0777	0.886432	170.231	1.81058	167.031	1.87249	121.911	13.2483	169.073	1.773		-2.13	rev discord.
Spot 43	406.534	478.87	25722.1	1.32072	19.3577	1.21332	0.18888	1.57969	0.0266637	0.84321	0.533783	169.634	1.41171	175.673	2.5483	257.753	30.6857	169.713	1.413		3.8	discord.
Spot 213	282.33	324.029	558215	1.59112	20.0838	1.57241	0.184852	1.76505	0.0268199	0.801807	0.45427	170.614	1.35005	172.227	2.79606	194.458	36.5478	170.642	1.35		1.02	concordant
Spot 259	459.827	525.845	32422.6	1.63683	19.4639	1.13456	0.190543	1.3174	0.0269784	0.649567	0.493067	171.609	1.10001	177.092	2.1409	250.912	26.3831	171.676	1.101		3.42	concordant
Spot 305	383.589	423.231	49868.2	2.27394	20.5679	1.32215	0.180197	1.59073	0.0270226	0.882991	0.555085	171.887	1.49769	168.23	2.46616	117.084	31.2	171.713	1.493		-2.33	rev discord.
Spot 69	338.022	380.518	53555.8	1.86926	20.168	1.4548	0.184217	1.80582	0.0270478	1.06952	0.592262	172.045	1.81572	171.683	2.85236	166.674	33.9851	172.029	1.813		-0.229	concordant
Spot 214	286.908	325.292	447727	1.75653	19.4803	1.77692	0.19281	2.07633	0.0271132	1.0741	0.517309	172.455	1.82779	179.024	3.40789	266.649	40.7647	172.53	1.829		4.07	discord.
Spot 278	275.127	307.428	118167	2.00164	19.9246	1.29887	0.191538	1.57283	0.0276132	0.885695	0.563121	175.593	1.53423	177.94	2.5672	209.258	30.1442	175.661	1.534		1.44	concordant
Spot 309	325.117	369.656	40275.3	1.71541	20.5209	1.35391	0.186255	1.74013	0.0279073	1.08867	0.625629	177.437	1.90537	173.428	2.77422	119.122	31.9898	177.15	1.897		-2.48	rev discord.
Spot 161	1674.44	1905.25	237827	1.70487	20.2692	0.800611	0.190669	1.2811	0.0279444	1	0.780582	177.67	1.75245	177.2	2.08306	170.907	18.6947	177.609	1.744		-0.288	concordant
Spot 224	325.304	352.699	869746	2.79048	19.6098	1.15318	0.198637	1.49674	0.0281076	0.954146	0.637483	178.693	1.68158	183.972	2.51854	252.333	26.537	178.852	1.683		3.17	concordant
Spot 42	1024.59	1164.9	56294.6	1.71607	19.9832	0.801691	0.198611	1.45235	0.0287737	1.21085	0.833718	182.868	2.18315	183.95	2.44358	197.859	18.6537	183.053	2.173		0.645	concordant
Spot 17	255.313	287.179	51593.1	1.88281	20.292	1.14093	0.197441	1.63204	0.0290101	1.14937	0.704253	184.35	2.08885	182.959	2.73241	165.013	27.091	184.221	2.08		-0.825	concordant
Spot 64	738.842	859.345	26417	1.44086	19.156	1.27214	0.207422	1.78047	0.0290626	1.24479	0.699135	184.679	2.26625	191.387	3.10571	274.923	29.1595	184.926	2.271		3.9	discord.
Spot 290	719.681	799.315	39067.7	2.12378	19.9637	0.783953	0.200098	1.49614	0.029109	1.27115	0.849622	184.969	2.31783	185.209	2.53296	188.25	18.3792	185.02	2.301		0.142	concordant
Spot 229	128.251	136.351	12883.4	3.72089	19.7991	1.52108	0.199523	1.91618	0.0291473	1.14499	0.597539	185.209	2.09046	184.722	3.23632	178.476	35.8089	185.186	2.086		-0.287	concordant
Spot 70	561.573	643.43	398684	1.61221	20.4194	0.865251	0.198238	1.51647	0.0293281	1.24539	0.821245	186.342	2.28746	183.635	2.54746	148.927	20.2606	185.765	2.26		-1.61	concordant
Spot 173	163.325	177.349	35935.4	2.73676	19.9049	1.59189	0.202178	1.99247	0.0293334	1.13806	0.571183	186.375	2.0907	186.968	3.40243	194.487	38.0083	186.398	2.088		0.347	concordant
Spot 125	623.615	686.83	130246	2.31827	20.1193	1.20252	0.202284	1.70975	0.0294318	1.21533	0.710824	186.991	2.23992	187.057	2.92091	187.867	28.0111	186.997	2.233		0.0385	concordant
Spot 8	566.125	615.903	186380	2.67267	19.9578	0.956539	0.205556	1.74516	0.0296188	1.45965	0.836399	188.162	2.70681	189.816	3.0214	210.462	22.1722	188.446	2.696		0.959	concordant
Spot 189	479.143	536.711	27915.2	1.95592	19.4856	1.12567	0.21876	1.39736	0.0310758	0.818634	0.585845	197.278	1.59052	200.877	2.54675	243.352	26.0915	197.403	1.59		1.99	concordant
Spot 281	325.498	363.165	176614	2.03072	19.7262	1.47048	0.218157	1.76586	0.0310849	0.977464	0.553533	197.334	1.89965	200.375	3.2111	236.285	33.9085	197.428	1.899		1.68	concordant
Spot 313	288.521	304.829	28037.5	4.15765	19.7451	1.17451	0.21594	1.43734	0.0312246	0.811663	0.564697	198.208	1.5843	198.525	2.59186	202.296	27.5367	198.221	1.582		0.176	concordant
Spot 226	1676.1	1862.64	396712	2.11156	19.8073	0.513524	0.223368	1.03272	0.0319383	0.895993	0.867604	202.668	1.78764	204.709	1.9146	228.269	11.8605	203.157	1.778		1.11	concordant
Spot 293	115.933	121.752	9371.9	4.68191	19.9573	1.61752	0.217766	1.88015	0.0324483	0.938117	0.498959	205.853	1.90064	200.049	3.4139	132.15	38.3061	205.592	1.894		-3.15	rev discord.
Spot 271	425.443	487.309	291038	1.61606	19.8224	0.823409	0.257981	1.17445	0.0369334	0.837409	0.713022	233.797	1.92276	233.038	2.44556	225.416	19.0398	233.708	1.912		-0.362	concordant
Spot 41	298.468	339.439	64469.1	1.71195	19.699	1.33563	0.27224	1.54909	0.0388511	0.784008	0.50611	245.707	1.89012	244.483	3.36582	232.766	30.8652	245.656	1.886		-0.56	concordant
Spot 195	1066.03	1131.95	52541.8	3.80036	19.3112	0.81329	0.282092	1.49128	0.0395673	1.24888	0.837453	250.151	3.06424	252.315	3.33168	272.466	18.7018	250.677	3.038		0.974	concordant
Spot 243	367.801	417.459	135903	1.74056	19.3861	1.01492	0.29052	1.46709	0.0406571	1.05935	0.722076	256.905	2.66801	258.968	3.35351	277.709	23.2581	257.149	2.656		0.901	concordant
Spot 315	177.262	207.585	133146	1.37374	19.4218	1.5755	0.296858	1.83008	0.0418689	0.931133	0.508793	264.407	2.41217	263.944	4.25364	259.854	36.1927	264.386	2.406		-0.198	concordant
Spot 220	199.365	222.74	28181.3	2.00435	18.9026	1.18357	0.321505	1.75688	0.0443373	1.28823	0.733244	279.661	3.52564	283.06	4.34005	311.226	27.1899	280.113	3.51		1.37	concordant
Spot 124	131.745	146.103	94773.2	2.15621	18.5587	1.35895	0.407538	1.60651	0.0546913	0.856778	0.533317	343.26	2.86404	347.101	4.72306	372.866	30.5947	343.488	2.856		1.3	concordant
Spot 94	295.707	328.741	29117.9	2.10363	18.3503	0.831288	0.483629	1.33369	0.0646935	1.04263	0.781763	404.106	4.08399	400.56	4.41444	380.131	18.699	402.938	3.966		-1.06	concordant
Spot 236	192.663	213.117	22232.8	2.21353	17.9662	1.17566	0.5188	1.64069	0.0680062	1.13274	0.690407	424.133	4.6497	424.349	5.69063	425.505	26.476	424.174	4.581		0.0614	concordant
Spot 204	440.365	480.599	158101	2.57211	16.4437	1.00506	0.794701	1.7591	0.0946593	1.4434	0.820532	583.034	8.04616	593.835	7.90935	635.338	21.6503	588.782	7.713		2.39	concordant
Spot 97	357.613	384.601	163642	3.11394	16.6062	0.780533	0.828669	1.18524	0.0994176	0.891724	0.75236	610.995	5.19815	612.873	5.45362	619.802	16.8692	611.749	4.981		0.396	concordant
Spot 264	433.21	514.877	312588	1.24658	16.4305	0.680204	0.886357	0.951491	0.105084	0.665293	0.699211	644.135	4.07824	644.41	4.53965	645.394	14.6149	644.224	3.929		0.0554	concordant
Spot 199	1012.66	1030.8	201724	13.119	12.3128	0.981874	1.3247	1.8309	0.118021	1.54529	0.844003	719.166	10.5157	856.569	10.594	1231.28	19.2708	734.09	12.7		24.5	discord.		high U/Th
Spot 206	270.586	295.122	506923	2.59167	13.256	0.947402	1.32444	1.36618	0.12702	0.984318	0.720488	770.844	7.15147	856.455	7.90427	1085.11	18.98	789.414	7.406		14.6	discord.
Spot 276	28.45	32.5786	36813.6	1.61938	11.1755	1.28413	1.86572	1.7546	0.151134	1.19428	0.680657	907.318	10.1079	1069.01	11.5995	1415.56	24.5834	924.96	10.87		24.9	discord.
Spot 76	459.123	483.362	268613	4.45139	13.5993	0.655475	1.72198	0.914308	0.169406	0.637352	0.697087	1008.84	5.95197	1016.76	5.87314	1033.86	13.2649	1012.92	5.48		1.12	concordant
Spot 244	47.819	57.6937	103008	1.13801	13.3534	1.04379	1.90912	1.28091	0.183987	0.742332	0.579534	1088.72	7.43629	1084.28	8.53553	1075.35	20.9465	1087.2	6.984		-0.609	concordant
Spot 260	147.552	164.699	105501	2.02222	13.3579	0.728407	1.91177	1.00752	0.184282	0.695678	0.690482	1090.33	6.97839	1085.2	6.71692	1074.94	14.6152	1087.43	6.262		-0.687	concordant
Spot 23	205.811	231.681	470095	1.86957	13.3914	0.669323	1.91997	1.19891	0.185193	0.994683	0.829654	1095.28	10.0193	1088.06	8.00467	1073.65	13.4234	1087.48	7.948		-1.04	concordant
Spot 227	131.121	153.045	205726	1.40548	13.0545	0.69999	1.93799	1.09171	0.182662	0.837668	0.7673	1081.5	8.34024	1094.3	7.31215	1119.85	13.9831	1091.3	7.291		1.73	concordant
Spot 294	363.984	398.765	750198	2.45925	11.5769	0.665036	2.43017	1.42229	0.203513	1.25723	0.88395	1194.16	13.7049	1251.57	10.2318	1351.7	12.8323	1277.68	10.02		8.35	discord.
Spot 107	1950.13	2204.44	1.77896e+06	1.80201	11.2288	0.792947	2.6354	1.23247	0.2134	0.943513	0.765547	1246.91	10.6969	1310.57	9.07219	1416.31	15.1629	1297.65	9.522		7.56	discord.
Spot 143	258.959	329.901	109501	0.857817	10.6017	0.655918	2.72563	1.23357	0.208747	1.04434	0.846595	1222.14	11.6264	1335.47	9.16376	1522.07	12.3762	1352.96	10.02		14.3	discord.
Spot 12	344.594	361.449	226399	4.80446	11.5209	0.69826	2.83905	1.4093	0.235772	1.22412	0.868601	1364.68	15.0555	1365.92	10.5828	1367.84	13.4435	1366.45	10.04		0.161	concordant
Spot 53	311.573	336.544	2.12995e+06	2.93212	11.0193	0.86093	2.95882	1.17106	0.235802	0.793846	0.677884	1364.83	9.76456	1397.11	8.88739	1446.71	16.3954	1384.96	8.679		3.62	concordant
Spot 62	387.264	439.263	198152	1.75015	11.4629	0.54137	2.98881	0.857141	0.24791	0.664369	0.775099	1427.69	8.50823	1404.77	6.52144	1370.16	10.4229	1404.29	6.435		-2.56	rev discord.
Spot 177	2930.83	3317.6	1.18581e+06	1.78075	10.3322	0.644741	2.99548	1.34811	0.223592	1.18394	0.87822	1300.82	13.9465	1406.47	10.2628	1570.38	12.0763	1454.99	10.12		13.9	discord.
Spot 102	181.225	198.565	155337	2.45605	10.8272	0.647951	3.17226	1.55891	0.247854	1.41774	0.909442	1427.4	18.1529	1450.43	12.0356	1484.33	12.2826	1466.72	10.25		3.17	concordant
Spot 238	206.95	225.432	461413	2.63133	10.9602	0.74411	3.43555	1.76969	0.271439	1.60564	0.907303	1548.1	22.0976	1512.57	13.9188	1463.15	14.1393	1488.38	11.82		-4.61	rev discord.
Spot 251	412.262	592.576	210731	0.537293	10.8251	0.669823	3.46608	1.17451	0.270583	0.964738	0.821396	1543.76	13.2442	1519.53	9.25573	1485.93	12.6901	1513.47	8.982		-2.66	rev discord.
Spot 210	135.369	154.352	211179	1.67583	10.4474	0.816052	3.46679	1.14419	0.261956	0.801996	0.700926	1499.84	10.7318	1519.69	9.01723	1547.44	15.3338	1515.11	8.972		2.06	concordant
Spot 154	218.942	237.519	426581	2.76965	10.5428	0.875544	3.4931	1.34629	0.266251	1.0227	0.75964	1521.74	13.8624	1525.66	10.628	1531.07	16.4854	1525.6	10.65		0.407	concordant
Spot 209	586.389	600.054	268273	10.0838	9.62828	0.608983	3.11657	1.37731	0.216987	1.23535	0.896935	1265.94	14.199	1436.79	10.5881	1699.69	11.2184	1541.89	10.08		23.5	discord.		high U/Th
Spot 310	92.3426	116.401	37814.6	0.90198	9.18004	0.81597	3.91588	1.147	0.261395	0.806043	0.702739	1496.98	10.7677	1616.97	9.27757	1776.89	14.8885	1577.01	9.991		12.3	discord.
Spot 15	157.153	172.725	160711	2.37157	10.1561	0.697391	3.7398	1.10546	0.273665	0.857692	0.775865	1559.38	11.8799	1579.93	8.85675	1607.46	13.0021	1581.03	8.945		2.1	concordant
Spot 104	300.112	310.749	252454	6.63035	10.1749	0.515106	3.82374	1.08061	0.280639	0.949905	0.879049	1594.58	13.419	1597.76	8.69786	1601.93	9.61083	1599.45	7.823		0.37	concordant
Spot 182	74.7021	85.4571	43429	1.63227	10.1453	0.715738	3.859	1.31665	0.283655	1.10249	0.837349	1609.74	15.705	1605.15	10.618	1599.11	13.433	1603.61	10.18		-0.494	concordant
Spot 239	958.192	1124.35	335681	1.35522	10.1008	0.576192	3.84655	1.28333	0.280105	1.1467	0.893534	1591.89	16.175	1602.55	10.3424	1616.57	10.7278	1609.08	8.967		1.28	concordant
Spot 33	932.628	993.069	4.42615e+06	3.62616	9.72108	0.567875	3.71231	1.22404	0.260034	1.08434	0.88587	1490.01	14.4256	1574.03	9.79154	1688.53	10.4773	1622.01	8.82		10.2	discord.
Spot 277	1971.63	2325.89	1.47621e+06	1.30793	9.66724	0.642971	2.80448	2.44912	0.195704	2.36322	0.964924	1152.2	24.9344	1356.73	18.3335	1695.49	11.8506	1633.15	8.724		38.9	discord.
Spot 286	865.179	1046.09	785109	1.12383	9.97897	0.62107	4.15457	1.19408	0.299789	1.01985	0.85409	1690.26	15.1635	1665.11	9.77261	1633.52	11.5396	1654.41	9.07		-2.68	rev discord.
Spot 208	400.603	453.823	428800	1.76889	9.61837	0.743232	4.12646	2.21594	0.287023	2.08758	0.942074	1626.64	30.0121	1659.56	18.1132	1701.46	13.6887	1689.11	12.29		4.33	discord.
Spot 93	894.55	978.458	1.48118e+06	2.50535	9.39755	0.582629	4.23272	1.12688	0.287318	0.964579	0.855969	1628.12	13.8782	1680.39	9.25579	1746.27	10.67	1702.67	8.705		5.61	discord.
Spot 1	319.329	345.856	134779	2.8289	9.47947	0.670928	4.4469	1.06704	0.304378	0.829709	0.777576	1712.98	12.4812	1721.12	8.84569	1731.02	12.3111	1722.11	8.822		0.776	concordant
Spot 10	343.081	375.952	272102	2.45274	9.36749	0.637779	4.5632	1.20837	0.308049	1.02635	0.849367	1731.1	15.5815	1742.57	10.0644	1756.36	11.6674	1747.31	9.389		1.17	concordant
Spot 267	83.5546	112.763	41835.4	0.672243	9.19497	1.06913	4.63959	1.50215	0.308575	1.0551	0.702394	1733.69	16.0389	1756.42	12.5486	1783.55	19.4925	1753.48	12.64		2.1	concordant
Spot 159	602.911	642.689	476038	3.56189	9.34337	0.61068	4.79544	1.0713	0.323655	0.880203	0.821619	1807.55	13.8742	1784.1	9.0011	1756.76	11.1711	1776.74	8.592		-2.25	rev discord.
Spot 31	271.155	296.881	194795	2.47694	9.04899	0.617158	4.81372	1.05254	0.314218	0.852549	0.809992	1761.43	13.1402	1787.3	8.84924	1817.61	11.205	1793.9	8.67		2.46	concordant
Spot 147	142.919	171.11	64384.3	1.19133	8.85774	0.729564	5.04858	1.07199	0.323099	0.785394	0.732649	1804.85	12.3637	1827.51	9.0855	1853.42	13.1873	1827.34	9.188		2.02	concordant
Spot 152	412.578	464.814	239189	1.85612	8.53556	0.614559	5.26082	1.40884	0.324313	1.2677	0.899816	1810.76	20.0129	1862.53	12.0208	1920.8	11.0195	1896.1	9.637		5.47	discord.
Spot 233	234.837	268.213	185686	1.65349	8.59618	0.788417	5.52769	1.20618	0.342912	0.912799	0.756768	1900.66	15.0255	1904.91	10.3715	1909.53	14.1576	1905.36	10.33		0.368	concordant
Spot 151	160.413	177.924	5.38515e+06	2.15279	8.22752	0.636283	5.72903	1.0541	0.340274	0.840404	0.797269	1887.99	13.7544	1935.76	9.11284	1987.27	11.321	1946.99	8.987		4.21	discord.
Spot 96	34.0292	36.6788	36223.1	3.01821	7.3759	0.850398	7.40077	1.23862	0.395241	0.900404	0.726942	2147.09	16.4426	2161.06	11.0801	2174.35	14.8142	2162.1	11.1		1.08	concordant
Spot 169	1572.78	1825.44	1.46503e+06	1.46286	5.95141	0.531574	6.77752	1.08706	0.291621	0.948229	0.872284	1649.62	13.8011	2082.79	9.61895	2543.37	8.91078	2333.49	8.012		42.1	discord.
Spot 205	122.578	159.178	190618	0.787048	5.34805	0.671542	13.1852	1.25687	0.510144	1.06242	0.84529	2657.25	23.1361	2693	11.8629	2719.93	11.069	2708.43	9.957		2.43	concordant

## Sheet: 18COA-9
Aliquot Name	18COA-9
Stratigraphic Formation Name	Bastendorff Fm
Stratigraphic Age	Eocene
Rock Type	sandstone
Mineral	Zircon
Method	U-Pb
Latitude	43.3411
Longitude	-124.353
Internal Uncertainty Level	one sigma
External Uncertainty 206/238 (% two sigma)	1.28647
External Uncertainty 206/207 (% two sigma)	0.884876
Analysis Purpose	DZ
Laboratory Name	Arizona LaserChron Center
Analyst Name	M. Darin
Aliquot Reference
Aliquot Instrumental Method	LA-ICPMS
Aliquot Instrumental Reference	Gehrels, G.E., Valencia, V., Ruiz, J., 2008, Enhanced precision, accuracy, efficiency, and spatial resolution of U-Pb ages by laser ablation-multicollector-inductively coupled plasma-mass spectrometry: Geochemistry, Geophysics, Geosystems, v. 9, Q03017, doi:10.1029/2007GC001805.
	Gehrels, G. and Pecha, M., 2014, Detrital zircon U-Pb geochronology and Hf isotope geochemistry of Paleozoic and Triassic passive margin strata of western North America: Geosphere, v. 10 (1), p. 49-65.
								Isotope ratios						Apparent ages (Ma)				Best Age
Analysis	U	eU	206Pb	U/Th	206Pb*	±	207Pb*	±	206Pb*	±	error	206Pb*	±	207Pb*	±	206Pb*	±	Concordia Age	±1σ	within 10% of YSCG (*)	Discordance (dc)	Concordance	Age Class	Notes
	(ppm)	(ppm)	204Pb		207Pb*	(%)	235U	(%)	238U	(%)	corr.	238U	(Ma)	235U	(Ma)	207Pb*	(Ma)	(Ma)	(Ma)		(%)
Spot 54	1929.62	1993.35	42703.6	7.11489	21.392	1.33846	0.0373819	1.75125	0.00580551	1.12832	0.644292	37.3165	0.419833	37.2647	0.640769	33.949	32.0644	37.316	0.42	--	-0.141	concordant	P	high eU
Spot 275	1725.03	1773.83	75642.4	8.30705	21.4362	0.977186	0.0379614	1.58172	0.00587419	1.24138	0.784828	37.7567	0.467332	37.8318	0.587381	42.6012	23.429	37.758	0.467	--	0.202	concordant	P	high eU
Spot 116	141.534	166.947	5954.95	1.30882	20.74	2.74892	0.0373225	3.29993	0.00588731	0.947417	0.287102	37.8408	0.35746	37.2066	1.20557	NA	NA	37.839	0.357	YSCG	-1.72	rev discord.	Y	YSCG, YC2σ
Spot 124	162.714	185.206	19591.7	1.70008	20.8041	2.50182	0.038685	2.7869	0.00589962	1.21652	0.436511	37.9197	0.459944	38.5393	1.05393	77.2789	59.5629	37.92	0.46	*	1.65	concordant	S	YC2σ
Spot 83	129.192	145.749	5097.61	1.83366	21.0456	3.28316	0.0365788	3.50869	0.00591125	1.15305	0.328627	37.9942	0.436803	36.4783	1.25719	NA	NA	37.983	0.437	*	-4.15	rev discord.	S	YC2σ
Spot 293	178.259	191.973	9640.83	3.05471	19.5448	2.89001	0.0408578	3.14695	0.00593056	1.17827	0.374416	38.1179	0.447805	40.6612	1.2543	193.453	67.8356	38.099	0.448	*	6.59	discord.	S	YC2σ
Spot 164	180.758	198.561	68708	2.38604	20.9963	2.68971	0.0389892	2.88562	0.005941	1.04414	0.361844	38.1848	0.397525	38.8367	1.09952	79.2838	63.9117	38.185	0.398	*	1.73	concordant	S	YC2σ
Spot 160	321.55	356.174	3076.63	2.18245	22.1157	2.6154	0.0334133	2.79864	0.00597476	0.982508	0.351066	38.4012	0.376173	33.3728	0.918803	NA	NA	38.26	0.375	*	-14.3	rev discord.	D	does not overlap concordia within 2σ
Spot 161	276.77	278.443	7864.93	38.8654	20.7135	2.23431	0.0382719	2.52516	0.00595492	1.07925	0.427398	38.274	0.411848	38.1355	0.945123	29.402	NA	38.273	0.412	*	-0.369	concordant	M	high U/Th
Spot 257	239.513	267.416	75150.4	2.01715	21.1446	2.021	0.0390589	2.34502	0.00596942	1.18917	0.507104	38.367	0.454893	38.9048	0.895069	72.1912	48.0625	38.367	0.455	*	1.42	concordant	S	YC2σ
Spot 61	1059.74	1096.28	138386	6.81449	21.5289	1.05178	0.0385203	1.60073	0.00598037	1.20667	0.753829	38.4371	0.462431	38.3783	0.602868	34.6835	25.1884	38.436	0.462	*	-0.156	concordant	P	high eU
Spot 227	274.067	317.911	8660.61	1.46898	17.7195	3.63941	0.0459422	3.85193	0.00602037	1.25555	0.325953	38.6934	0.484359	45.6091	1.71796	426.215	81.2231	38.594	0.484	*	16.8	discord.	D	does not overlap concordia within 2σ
Spot 250	66.6254	76.1741	5075.9	1.6397	18.992	4.59025	0.0415326	4.79767	0.00601018	1.33528	0.278319	38.6282	0.514252	41.3193	1.94257	200.503	107.06	38.617	0.514	*	6.87	discord.	S	YC2σ
Spot 278	1916.05	1959.89	140827	10.2709	21.3053	0.734855	0.0391756	1.12565	0.00601213	0.851777	0.756701	38.6407	0.328148	39.0188	0.430882	62.3161	17.5128	38.644	0.328	*	0.992	concordant	M	high U/Th, high eU
Spot 189	983.716	1018.33	640341	6.67842	21.925	1.47402	0.0382482	1.92596	0.00605932	1.23959	0.643622	38.943	0.481279	38.1123	0.720423	NA	NA	38.919	0.481	*	-2.2	rev discord.	P	high eU
Spot 243	117.318	132.341	3670.05	1.83511	21.2714	3.45127	0.0362452	4.16406	0.00606539	1.6162	0.388131	38.9819	0.628125	36.1515	1.47889	NA	NA	38.928	0.627	*	-7.68	rev discord.	S	YC2σ
Spot 223	988.428	1017.33	17791.5	8.0381	21.4145	1.53738	0.0387232	2.17442	0.00606124	1.32158	0.607782	38.9553	0.513272	38.5767	0.823086	15.0575	NA	38.949	0.513	*	-0.995	concordant	P	high eU
Spot 289	109.858	118.783	113958	2.89271	19.2879	3.252	0.0435851	3.52333	0.0060698	1.35584	0.38482	39.0102	0.52732	43.3182	1.49415	288.886	74.3172	38.951	0.527	*	10.7	discord.	D	does not overlap concordia within 2σ
Spot 10	629.419	693.061	18511.2	2.32412	21.5291	1.52028	0.0385425	1.91791	0.0060639	1.16106	0.605378	38.9724	0.451129	38.4	0.722728	2.78434	NA	38.962	0.451	*	-1.51	concordant	S	YC2σ
Spot 285	1740.89	1784.07	69287.7	9.47456	21.5956	0.930631	0.038833	1.40262	0.00607076	1.04268	0.74338	39.0164	0.405588	38.684	0.532385	18.0913	NA	39.006	0.405	*	-0.872	concordant	P	high eU
Spot 259	820.257	1019.13	20348.5	0.969265	21.3131	1.60926	0.0390441	1.98985	0.00608384	1.15121	0.578539	39.1001	0.448761	38.8904	0.759229	25.9673	NA	39.098	0.449	*	-0.548	concordant	P	high eU
Spot 76	115.37	132.466	5188.69	1.58593	19.6849	3.9831	0.0406127	4.22517	0.00610787	1.36196	0.322344	39.2541	0.533	40.4221	1.67435	110.311	94.4722	39.252	0.533	*	2.99	concordant	S	YC2σ
Spot 260	1152.5	1256.87	29055.4	2.59504	21.3191	1.45298	0.039443	1.86441	0.00611632	1.03274	0.553927	39.3083	0.404719	39.2801	0.718356	37.5343	37.1671	39.308	0.405	*	-0.0732	concordant	P	high eU
Spot 165	1454.32	1511.55	60668	5.97215	21.3947	1.08386	0.0394393	1.46705	0.00612794	0.969618	0.660932	39.3827	0.380698	39.2765	0.565203	32.7996	26.3889	39.381	0.381	*	-0.275	concordant	P	high eU
Spot 269	331.44	369.139	16525.6	2.06607	20.6738	2.08079	0.0405433	2.34584	0.00613305	1.01662	0.433373	39.4154	0.399484	40.3544	0.928086	96.5526	50.0635	39.414	0.4	*	2.4	concordant	S
Spot 34	159.762	173.986	13876.9	2.6395	22.2093	2.9191	0.0376423	3.26864	0.00615169	1.46763	0.449003	39.5349	0.57845	37.5196	1.204	NA	NA	39.496	0.578	*	-5.33	rev discord.	S	YC2σ
Spot 69	1866.48	1922.12	82606.1	7.88302	21.6403	0.866145	0.0392576	1.38385	0.00615096	1.07039	0.773486	39.5302	0.421833	39.0989	0.530788	12.6841	NA	39.512	0.421	*	-1.12	concordant	P	high eU
Spot 25	125.673	135.921	6177.68	2.88173	20.1163	3.53969	0.0406169	4.57056	0.0061699	1.39817	0.305908	39.6515	0.552694	40.4262	1.81141	86.6768	NA	39.651	0.553	*	1.97	concordant	S
Spot 18	142.827	160.139	4809.2	1.93884	16.5129	5.30634	0.049637	5.6219	0.00620304	1.70236	0.302809	39.8639	0.676533	49.1896	2.69948	531.154	117.438	39.725	0.676	*	21.5	discord.	D	does not overlap concordia within 2σ
Spot 56	899.142	927.956	12680.2	7.33342	21.4386	1.25929	0.0393428	1.90894	0.00622786	1.3206	0.691795	40.0228	0.526903	39.1822	0.733717	NA	NA	39.992	0.526	*	-2.16	rev discord.	S
Spot 36	157.766	168.443	14953.8	3.4724	20.9148	3.20762	0.0406571	3.43446	0.00624458	1.18486	0.344991	40.13	0.474006	40.4654	1.36244	60.4014	NA	40.13	0.474	*	0.849	concordant	S
Spot 258	994.653	1014.63	234954	11.6993	21.3664	1.08827	0.04058	1.49354	0.00624913	1.0229	0.68488	40.1592	0.40951	40.3901	0.591403	54.1363	25.9522	40.161	0.41	*	0.585	concordant	M	high U/Th
Spot 41	200.052	211.219	17931.3	4.20987	20.8017	3.47108	0.0412346	3.72803	0.00628114	1.2248	0.328539	40.3642	0.492837	41.0287	1.49907	80.0436	NA	40.364	0.493	*	1.67	concordant	S
Spot 315	163.906	179.424	74877.8	2.48219	15.2355	5.17899	0.0573815	5.3265	0.00631085	1.24482	0.233704	40.5545	0.503247	56.6539	2.93504	804.616	108.514	40.367	0.502	*	34.2	discord.	D	does not overlap concordia within 2σ
Spot 44	490.948	536.36	15223.4	2.54063	21.224	1.98233	0.0403562	2.69542	0.00629484	1.49168	0.553415	40.452	0.601526	40.1717	1.06166	23.4641	NA	40.449	0.601	*	-0.709	concordant	S
Spot 66	244.331	280.733	6826.99	1.57735	21.2931	2.31432	0.0395195	2.601	0.0063563	0.969369	0.372691	40.8457	0.394693	39.3548	1.00404	NA	NA	40.831	0.395	*	-3.79	rev discord.	S
Spot 172	327.03	346.764	12976.1	3.89455	21.3309	1.99324	0.0402668	2.49082	0.00636008	1.45067	0.582405	40.8699	0.591011	40.0845	0.978983	NA	NA	40.854	0.591	*	-1.98	rev discord.	S
Spot 225	445.419	498.791	10811.8	1.96118	21.4286	1.70146	0.0404463	2.30919	0.00640571	1.56065	0.67584	41.1622	0.640349	40.2597	0.911485	NA	NA	41.13	0.64	*	-2.26	rev discord.
Spot 171	453.421	510.164	45609	1.87782	21.119	1.90827	0.0418604	2.59996	0.00643082	1.76401	0.678475	41.323	0.726611	41.6388	1.0607	59.8732	45.5203	41.326	0.727	*	0.777	concordant
Spot 308	543.331	566.775	115184	5.44618	22.1838	1.57692	0.0402325	1.91643	0.00643922	1.08901	0.56825	41.3768	0.449154	40.0511	0.752609	NA	NA	41.343	0.449	*	-3.32	rev discord.
Spot 313	385.952	403.5	21136.3	5.16872	20.6284	1.9154	0.042805	2.50354	0.00644535	1.53955	0.61495	41.416	0.635579	42.559	1.04346	107.489	46.6284	41.409	0.636	*	2.78	concordant
Spot 295	256.04	283.285	20053.6	2.2085	21.5737	2.35051	0.0410965	2.51886	0.00648409	0.864074	0.343041	41.6642	0.358848	40.894	1.0096	NA	NA	41.66	0.359		-1.9	rev discord.
Spot 242	488.115	528.82	7714.59	2.81801	21.9489	1.473	0.039614	1.90602	0.00651765	1.20766	0.633603	41.8791	0.504119	39.4472	0.737454	NA	NA	41.736	0.503		-6.11	rev discord.	D	discordant
Spot 230	455.338	527.442	28613.4	1.48403	21.0346	1.62693	0.0426272	2.03301	0.0065102	1.09626	0.539228	41.8315	0.457096	42.3858	0.843973	73.8722	40.678	41.832	0.457		1.34	concordant
Spot 13	431.175	500.595	40104.9	1.45959	18.0157	3.71192	0.0503315	3.97143	0.00655536	1.40478	0.353722	42.1207	0.589774	49.8613	1.93237	439.83	82.6802	41.984	0.589		17.3	discord.	D	discordant
Spot 133	624.401	714.711	12902.1	1.62479	20.413	1.59552	0.0433436	2.00364	0.00653548	1.20834	0.603071	41.9933	0.505773	43.0833	0.845179	104.218	37.7578	41.988	0.506		2.62	concordant
Spot 22	297.061	317.233	9020.56	3.46066	21.2741	2.25408	0.0422189	2.63684	0.00669306	1.27641	0.484066	43.0025	0.54706	41.9881	1.08458	NA	NA	42.989	0.547		-2.44	rev discord.
Spot 147	656.176	767.241	16175.6	1.38839	21.5139	1.64729	0.0437055	1.93149	0.00693412	0.999506	0.51748	44.5459	0.443704	43.4354	0.821258	NA	NA	44.527	0.443		-2.58	rev discord.
Spot 222	310.826	381.477	37011.5	1.03387	21.2127	2.10439	0.045675	2.42416	0.00701116	1.20269	0.496128	45.0391	0.539794	45.3497	1.07516	61.8101	50.1578	45.04	0.54		0.702	concordant
Spot 263	164.879	188.365	6004.05	1.64978	21.3157	2.66134	0.043393	2.94771	0.00702659	1.02838	0.348873	45.1379	0.462566	43.1313	1.24476	NA	NA	45.118	0.462		-4.65	rev discord.
Spot 314	206.214	236.673	5994.48	1.59097	20.4877	2.8526	0.045628	3.1092	0.00708333	1.17602	0.378239	45.5011	0.533219	45.304	1.37763	34.863	NA	45.5	0.533		-0.444	concordant
Spot 95	278.37	314.238	22392	1.82383	20.919	2.52737	0.0462867	2.84203	0.00708672	1.29595	0.455995	45.5228	0.587876	45.9435	1.27663	67.9779	60.2228	45.524	0.588		0.941	concordant
Spot 274	458.661	547.789	40223.1	1.20933	21.5938	1.95079	0.0462547	2.22001	0.00723195	1.0584	0.476754	46.4524	0.489884	45.9124	0.996558	17.7722	NA	46.447	0.49		-1.2	concordant
Spot 122	104.501	121.842	4218.16	1.4162	19.6806	3.10936	0.0474382	4.96597	0.00723517	1.10921	0.223362	46.473	0.513629	47.0603	2.28367	77.0657	NA	46.473	0.514		1.29	concordant
Spot 302	697.296	940.525	24858.6	0.673704	21.3718	1.23168	0.0465151	1.70894	0.00725049	0.994088	0.581698	46.571	0.461288	46.1651	0.771268	25.1506	NA	46.565	0.461		-0.896	concordant
Spot 144	455.273	531.283	37614.8	1.40757	20.9185	1.39355	0.0477603	1.80644	0.00728249	1.14849	0.635774	46.7758	0.535269	47.3726	0.836099	77.6577	33.1083	46.778	0.535		1.3	concordant
Spot 309	143.665	166.379	9314.31	1.48638	20.7198	3.09419	0.0473079	3.36487	0.0072916	1.30796	0.38871	46.8341	0.610351	46.934	1.54333	52.0246	NA	46.834	0.61		0.218	concordant
Spot 117	378.929	433.485	107562	1.63223	21.1396	1.38349	0.047922	1.8371	0.00733784	1.20773	0.657413	47.13	0.567129	47.5292	0.853039	67.7358	32.9534	47.133	0.567		0.863	concordant
Spot 28	772.468	903.669	20497.1	1.38361	24.0402	1.19449	0.0496443	1.80222	0.00873109	1.34574	0.746708	56.0399	0.750881	49.1966	0.865498	NA	NA	54.408	0.735		-13.6	rev discord.
Spot 97	1713.37	1758.33	8.11574e+06	8.95681	21.0984	0.995988	0.0740104	1.50233	0.0112703	1.12472	0.748652	72.2466	0.808035	72.498	1.05118	80.775	23.6468	72.255	0.808		0.36	concordant
Spot 218	972.979	1083.84	151137	2.06248	21.2535	1.17086	0.0740483	1.96372	0.0113172	1.57643	0.802777	72.5457	1.13722	72.5339	1.37468	72.1279	27.8516	72.545	1.136		-0.0169	concordant
Spot 180	620.546	625.453	182761	29.7198	21.2042	0.991821	0.075604	1.59334	0.0116149	1.247	0.782632	74.4431	0.922966	74.0035	1.13719	59.8036	23.639	74.416	0.922		-0.614	concordant		high U/Th
Spot 139	475.06	493.318	79037	6.11476	21.2399	1.20188	0.0797872	1.58917	0.0122937	1.03944	0.654077	78.7668	0.81375	77.9448	1.19233	52.8406	28.6725	78.738	0.813		-1.09	concordant
Spot 229	220.67	248.8	14782.2	1.84348	20.6527	1.74575	0.0832877	2.10426	0.0126136	1.15974	0.551138	80.804	0.931267	81.2312	1.64274	93.8156	41.5954	80.809	0.931		0.548	concordant
Spot 282	362.637	375.654	71557.5	6.54696	21.2326	1.53818	0.082565	2.09277	0.0126714	1.41799	0.677566	81.1717	1.14379	80.5536	1.62066	62.2731	36.6677	81.149	1.143		-0.795	concordant
Spot 67	1118.65	1173.07	231957	4.83113	20.4958	0.876219	0.0888447	1.58827	0.0131359	1.32468	0.83404	84.1281	1.10719	86.4266	1.31589	150.368	20.5304	84.163	1.11		2.81	concordant
Spot 273	978.669	990.787	166528	18.9784	20.9533	1.01774	0.0884271	1.48711	0.0133338	1.08386	0.728836	85.3871	0.919375	86.0371	1.22676	104.114	24.0907	85.408	0.919		0.79	concordant		high U/Th
Spot 101	728.852	835.121	64673.9	1.61176	20.6663	1.41762	0.0895383	1.89991	0.0134149	1.26128	0.663861	85.9029	1.07629	87.0732	1.58537	119.301	33.4732	85.923	1.077		1.41	concordant
Spot 265	90.579	98.4214	38318.9	2.71422	18.7389	2.88986	0.0992977	3.18908	0.0134764	1.34838	0.42281	86.2943	1.15582	96.1279	2.92497	347.489	65.3454	86.146	1.156		11.3	discord.
Spot 228	619.745	699.51	66962.7	1.82586	21.0732	1.1892	0.0891687	1.81935	0.0135429	1.37687	0.756792	86.717	1.18599	86.7287	1.51239	87.0725	28.1999	86.718	1.185		0.014	concordant
Spot 86	337.609	399.481	30209.2	1.28231	17.7821	3.15466	0.107337	3.36169	0.0138917	1.15398	0.343273	88.9352	1.01925	103.527	3.30873	453.942	70.0992	88.735	1.019		15.9	discord.
Spot 226	437.054	459.459	122264	4.58415	20.5703	1.37654	0.0940139	1.9247	0.013908	1.34518	0.698905	89.0393	1.18951	91.2356	1.67944	149.07	32.2581	89.063	1.19		2.55	concordant
Spot 145	449.519	508.678	20693.3	1.78566	20.7986	1.03001	0.0913754	1.85041	0.0139462	1.53459	0.829325	89.2819	1.36066	88.7838	1.57308	75.3903	24.5694	89.232	1.357		-0.585	concordant
Spot 72	340.158	374.372	9052.03	2.33636	15.5338	3.48317	0.123285	3.64674	0.0141681	0.969575	0.265874	90.6923	0.873173	118.046	4.06404	711.921	74.7169	90.339	0.872		27.7	discord.
Spot 3	135.518	150.979	7439.77	2.05983	20.8614	2.08864	0.0905409	2.5664	0.0141803	1.38387	0.539228	90.7701	1.24734	88.0072	2.1635	13.6936	NA	90.683	1.245		-3.23	rev discord.
Spot 84	335.659	365.013	46976.4	2.68719	19.2985	1.31581	0.102259	2.02639	0.0143123	1.54041	0.760171	91.6092	1.40117	98.8594	1.90885	277.458	30.134	91.213	1.405		8.01	discord.
Spot 77	421.679	445.095	23296.2	4.23193	20.0755	2.05867	0.0984399	3.01352	0.0144364	2.20003	0.730052	92.3975	2.01827	95.3352	2.74221	169.444	48.1184	92.415	2.021		3.28	concordant
Spot 23	290.489	353.083	84943.3	1.09061	21.3278	1.36562	0.0939989	1.62733	0.0144713	0.88497	0.543818	92.6196	0.813795	91.2217	1.41975	54.7891	32.5954	92.585	0.813		-1.59	concordant
Spot 43	606.056	647.187	57282.5	3.46265	20.0691	1.12308	0.0997337	1.80116	0.0144805	1.40143	0.778073	92.678	1.28953	96.5305	1.65858	192.803	26.3216	92.651	1.293		4.27	discord.
Spot 190	158.511	170.244	11124.4	3.17477	20.849	1.91659	0.0941633	2.21682	0.0145685	1.03684	0.467716	93.2371	0.959766	91.3743	1.93714	42.9937	NA	93.203	0.959		-2.11	rev discord.
Spot 193	733.761	766.861	72832.4	5.20941	20.9428	0.896208	0.0969351	1.55348	0.0147101	1.26881	0.816754	94.1365	1.18574	93.9432	1.39392	89.0622	21.2335	94.12	1.183		-0.215	concordant
Spot 166	147.501	165.834	303527	1.89073	20.7986	1.7138	0.0980363	1.88707	0.0147458	0.789859	0.418563	94.3635	0.73991	94.962	1.71076	110.036	40.4807	94.368	0.74		0.662	concordant
Spot 12	557.381	598.806	76074.6	3.16197	21.0054	1.25579	0.0974909	1.72551	0.0147677	1.18193	0.684974	94.5026	1.10881	94.4576	1.55637	93.3001	29.7578	94.501	1.108		-0.0498	concordant
Spot 110	354.324	387.392	51855.2	2.51805	21.1061	1.50357	0.0973092	2.00301	0.0148954	1.31915	0.658586	95.3136	1.24808	94.2895	1.80359	68.4533	35.8773	95.271	1.246		-1.13	concordant
Spot 135	263.442	305.832	11854.1	1.46048	20.6605	1.3577	0.0975878	1.98411	0.0149447	1.07231	0.540447	95.6267	1.01784	94.5473	1.79124	67.4221	39.7352	95.602	1.017		-1.19	concordant
Spot 65	431.564	437.115	283885	18.2698	20.8118	1.49401	0.100453	1.99998	0.0150779	1.32955	0.664784	96.4729	1.27311	97.1946	1.85374	114.914	35.2459	96.492	1.273		0.781	concordant		high U/Th
Spot 199	756.883	832.411	39512.4	2.355	20.836	1.25909	0.0998059	1.84933	0.0150968	1.31431	0.710693	96.5928	1.26006	96.5972	1.70406	96.7176	30.8166	96.593	1.259		0.00471	concordant
Spot 281	1046.88	1128.93	146274	2.99839	20.9998	1.10569	0.100245	1.8666	0.0151815	1.5038	0.805638	97.1307	1.4497	97.0024	1.72685	93.8363	26.1658	97.12	1.447		-0.139	concordant
Spot 184	991.36	1010.36	71319.3	12.2639	20.662	0.865451	0.101391	1.1976	0.0152007	0.827223	0.690736	97.2527	0.798459	98.0594	1.11943	117.707	20.4314	97.277	0.798		0.866	concordant		high U/Th
Spot 303	145.243	167.283	10135.6	1.54859	21.2784	2.03394	0.0992368	2.35764	0.0156924	1.17433	0.498095	100.374	1.16959	96.0716	2.16117	NA	NA	100.234	1.167		-4.59	rev discord.
Spot 118	255.609	280.804	27406.1	2.38417	20.6557	2.03282	0.10455	2.28939	0.0157723	1.04151	0.454929	100.881	1.04251	100.968	2.20034	103.019	48.2096	100.882	1.042		0.0904	concordant
Spot 19	402.827	441.061	30910.5	2.47589	21.0352	1.20146	0.104592	1.72186	0.015983	1.13384	0.6585	102.218	1.14985	101.006	1.65548	72.4868	30.8108	102.163	1.148		-1.25	concordant
Spot 248	148.218	157.423	5957.92	3.7842	20.8707	1.81533	0.101078	2.01231	0.0160058	0.859556	0.427149	102.363	0.872921	97.771	1.8757	NA	NA	102.258	0.872		-4.82	rev discord.
Spot 202	197.132	211.874	20870.2	3.14228	20.6284	1.7857	0.106304	2.07336	0.0160293	1.00351	0.484002	102.512	1.02059	102.579	2.02294	104.124	42.8713	102.513	1.02		0.0685	concordant
Spot 204	270.65	297.446	32165.6	2.37356	20.6628	1.3384	0.106739	1.78778	0.0160498	1.17461	0.65702	102.642	1.1961	102.978	1.75074	110.772	31.8254	102.653	1.196		0.343	concordant
Spot 170	92.0938	101.036	11816.1	2.42009	19.7957	2.32587	0.110634	2.6859	0.0162224	1.06703	0.39727	103.737	1.09805	106.545	2.71668	169.766	57.5757	103.745	1.098		2.81	concordant
Spot 52	158.767	168.116	43171.9	3.99116	21.0235	1.74312	0.106571	2.05889	0.0162605	1.09563	0.532147	103.979	1.13008	102.823	2.01336	76.1057	41.4089	103.952	1.129		-1.17	concordant
Spot 251	114.083	123.228	21851.7	2.93139	19.8332	2.18125	0.112438	2.49075	0.0162725	1.18933	0.477498	104.055	1.22763	108.193	2.55623	200.302	50.8393	104.057	1.228		4.11	discord.
Spot 114	351.12	366.998	14775.8	5.19664	21.0503	1.41525	0.105375	1.87012	0.0163449	1.22225	0.653568	104.514	1.26712	101.726	1.8102	36.8487	33.8781	104.35	1.263		-2.84	rev discord.
Spot 163	143.516	158.047	8826.11	2.32096	21.0633	1.61427	0.103928	1.99487	0.016384	1.10957	0.556214	104.762	1.15302	100.396	1.90694	NA	NA	104.568	1.15		-4.47	rev discord.
Spot 60	58.8671	63.1391	4659.46	3.23821	20.0587	2.82289	0.106379	3.23811	0.0164147	1.10422	0.341009	104.957	1.14958	102.648	3.16136	49.3278	NA	104.935	1.149		-2.34	rev discord.
Spot 105	257.871	269.243	31397.9	5.32863	21.121	1.67968	0.107176	2.03979	0.016493	1.15351	0.565506	105.454	1.20653	103.379	2.00492	55.8142	40.1218	105.385	1.205		-2.09	rev discord.
Spot 158	147.737	172.612	14067.6	1.39574	21.1104	1.97676	0.106166	2.42738	0.0165415	1.38094	0.568901	105.761	1.44858	102.452	2.36556	26.1439	NA	105.625	1.445		-3.34	rev discord.
Spot 195	101.724	112.736	5923.29	2.17084	20.3567	2.41734	0.107019	3.19574	0.0165262	1.14756	0.359091	105.664	1.20268	103.235	3.13695	47.5187	NA	105.637	1.202		-2.45	rev discord.
Spot 62	123.331	143.057	9627.26	1.46925	21.4773	2.31961	0.103677	2.64846	0.0165678	1.2754	0.481564	105.928	1.33997	100.165	2.52619	NA	NA	105.722	1.337		-5.88	rev discord.
Spot 224	140.047	152.769	72212.3	2.58697	21.6295	2.18916	0.106164	2.43235	0.0165465	1.05985	0.435732	105.793	1.11209	102.45	2.37036	25.3907	NA	105.725	1.111		-3.38	rev discord.
Spot 15	406.307	456.073	41950.3	1.91862	20.7409	1.36511	0.110109	2.07257	0.0165384	1.54188	0.743947	105.741	1.61711	106.065	2.08735	113.338	32.7038	105.759	1.616		0.322	concordant
Spot 197	204.369	226.447	18285.9	2.17531	21.0917	1.59027	0.107306	1.78868	0.0165796	0.794956	0.444438	106.003	0.835784	103.498	1.76002	46.1795	38.289	105.956	0.835		-2.52	rev discord.
Spot 123	214.486	221.502	10382.8	7.18417	20.6817	1.50383	0.108278	1.88597	0.0166479	1.1009	0.58373	106.436	1.16213	104.389	1.87093	57.8937	36.5131	106.361	1.16		-2.04	rev discord.
Spot 182	76.6913	85.4695	9621.15	2.05308	20.1857	2.80189	0.110447	3.04797	0.01664	1.18909	0.390125	106.385	1.25464	106.374	3.07821	106.097	66.2996	106.385	1.254		-0.0112	concordant
Spot 168	110.986	122.943	7016.18	2.18135	20.1575	1.84321	0.109668	3.15653	0.0166653	1.28532	0.407194	106.546	1.3582	105.661	3.16757	85.7805	68.4133	106.536	1.358		-0.878	concordant
Spot 311	54.7588	60.6016	12977.5	2.20244	21.0224	2.72258	0.108062	2.98099	0.016744	1.1434	0.383563	107.045	1.21385	104.191	2.95189	39.4166	NA	107.006	1.213		-2.84	rev discord.
Spot 203	64.418	72.0348	13339.1	1.98747	20.0647	3.11377	0.113367	3.47679	0.016756	1.08019	0.310684	107.121	1.14755	109.04	3.59466	151.178	77.4415	107.127	1.148		1.87	concordant
Spot 300	99.1074	109.094	35528.2	2.33224	19.9964	2.38958	0.115523	2.60045	0.0167728	1.02015	0.3923	107.228	1.08484	111.005	2.73443	192.817	55.6242	107.233	1.085		3.65	concordant
Spot 307	49.896	55.1756	6737.74	2.22091	20.6383	3.41809	0.107961	3.71619	0.0167896	1.36025	0.366034	107.334	1.44793	104.098	3.67681	30.646	NA	107.292	1.447		-3.22	rev discord.
Spot 162	96.3654	111.617	5933.74	1.48485	21.5774	2.39974	0.102366	2.59567	0.0168542	0.970802	0.374008	107.744	1.03728	98.958	2.44743	NA	NA	107.512	1.035		-8.94	rev discord.
Spot 14	110.81	122.327	4757.5	2.26102	20.6423	2.32814	0.106261	2.5747	0.0168507	1.06407	0.413281	107.722	1.13672	102.54	2.51117	NA	NA	107.604	1.135		-5.19	rev discord.
Spot 115	107.799	121.14	5104.46	1.89879	20.5124	2.92876	0.107125	3.10801	0.0168524	1.01922	0.327932	107.732	1.0889	103.332	3.05357	3.00087	NA	107.679	1.088		-4.39	rev discord.
Spot 270	87.7228	97.5101	10393.9	2.10629	16.8272	2.71136	0.136645	3.17749	0.0169188	1.13354	0.356741	108.153	1.21573	130.051	3.87867	551.366	64.8101	107.764	1.215		19.6	discord.
Spot 209	98.9859	110.02	13027.4	2.10818	20.3465	2.09214	0.112549	2.63508	0.0168703	1.16366	0.441603	107.846	1.24452	108.294	2.70674	118.177	55.7317	107.851	1.244		0.437	concordant
Spot 64	94.0517	105.615	10678.8	1.91138	20.1259	2.20219	0.113428	2.97076	0.0169006	1.51312	0.509337	108.038	1.62112	109.097	3.07297	132.29	60.1291	108.051	1.621		1.03	concordant
Spot 112	59.3588	66.2811	3415.14	2.01512	20.4079	3.19361	0.104989	3.39107	0.0169663	1.11098	0.327618	108.455	1.19483	101.371	3.27155	NA	NA	108.338	1.193		-7.11	rev discord.
Spot 73	121.707	140.175	6766.06	1.54873	20.8032	1.93521	0.108235	2.34371	0.0170177	1.30898	0.558509	108.78	1.41197	104.349	2.32418	4.31618	NA	108.579	1.408		-4.38	rev discord.
Spot 132	95.2808	104.648	9962.23	2.39032	20.0693	2.03352	0.113915	2.5563	0.0169924	1.45143	0.567786	108.62	1.56333	109.54	2.65443	129.598	49.5087	108.636	1.563		0.89	concordant
Spot 216	408.981	442.545	648419	2.8635	20.8363	1.19524	0.113548	1.90758	0.0170057	1.4867	0.779363	108.704	1.60255	109.206	1.97508	120.172	28.177	108.737	1.601		0.485	concordant
Spot 1	144.607	166.309	19305.3	1.56586	21.3187	2.35334	0.109509	2.67547	0.017079	1.27119	0.475127	109.168	1.37605	105.516	2.68133	23.82	NA	109.072	1.374		-3.58	rev discord.
Spot 85	138.442	148.787	24891.4	3.14474	21.355	2.18984	0.109627	2.48689	0.017093	1.00825	0.405426	109.257	1.09231	105.624	2.49475	24.4183	NA	109.193	1.091		-3.56	rev discord.
Spot 217	95.7328	107.208	22043.5	1.96053	20.1141	1.74212	0.116642	2.05957	0.0170853	1.0908	0.529627	109.208	1.18121	112.023	2.18448	172.241	40.7916	109.229	1.182		2.69	concordant
Spot 174	70.2118	78.7401	22862.6	1.93472	21.1435	2.35869	0.110393	2.64023	0.0171134	1.18586	0.449151	109.387	1.28623	106.324	2.66523	38.2227	NA	109.322	1.285		-2.99	rev discord.
Spot 266	46.4456	52.0595	53037.9	1.94424	20.9947	3.13305	0.113044	3.3915	0.017166	1.29854	0.382881	109.72	1.41271	108.746	3.49751	87.4891	74.302	109.71	1.412		-0.94	concordant
Spot 206	69.2419	80.9392	5044.13	1.39107	19.8402	1.89173	0.11347	3.78764	0.0172148	1.11285	0.293812	110.03	1.21408	109.135	3.91927	89.6827	85.8155	110.025	1.214		-0.861	concordant
Spot 173	76.8997	85.5099	303562	2.09883	20.7379	2.65124	0.114998	2.8769	0.0172498	1.11692	0.388236	110.251	1.22095	110.527	3.01282	116.472	62.5176	110.254	1.221		0.264	concordant
Spot 247	48.5508	53.0775	176791	2.52047	19.7937	3.15049	0.121236	3.40395	0.0172919	1.2889	0.378648	110.518	1.41232	116.192	3.73722	234.032	72.7195	110.511	1.413		5.29	discord.
Spot 304	223.979	245.385	28429.7	2.45894	20.9277	1.21168	0.113752	1.61957	0.0173301	1.06986	0.660584	110.76	1.17486	109.392	1.67959	79.6929	28.8788	110.693	1.173		-1.31	concordant
Spot 252	187.928	210.704	23829.1	1.93898	20.9455	1.51138	0.113569	1.84176	0.0173512	1.05093	0.570613	110.894	1.15545	109.225	1.90724	72.9706	35.9621	110.84	1.154		-1.6	concordant
Spot 181	258.123	283.86	30991.8	2.35683	20.6039	1.30269	0.115396	1.70961	0.017367	0.990234	0.579215	110.994	1.08969	110.89	1.79594	108.663	32.9355	110.991	1.089		-0.0992	concordant
Spot 155	188.045	214.047	26318.1	1.69948	20.8819	1.622	0.114165	1.87156	0.0174158	0.896126	0.478813	111.303	0.988856	109.768	1.94723	76.5712	39.0591	111.273	0.988		-1.46	concordant
Spot 111	99.6201	101.583	52547.6	11.9243	19.5606	2.20874	0.122911	2.58676	0.0174271	1.34619	0.520415	111.375	1.48644	117.708	2.87496	247.683	50.8367	111.345	1.488		5.85	discord.		high U/Th
[truncated: 166 more rows]

## Sheet: 18COA-12
Aliquot Name	18COA-12
Stratigraphic Formation Name	upper beds of Sacchi Beach
Stratigraphic Age	Eocene
Rock Type	sandstone
Mineral	Zircon
Method	U-Pb
[truncated: 323 more rows]

[truncated: 16 more sheets: 18COA-13, 19COA1, 19COA-2, 19COA-4, 19COA-5, 19COA-6, 19COA-7, 19COA-8, 20COA-1, 20COA-2, 20COA-14, 20COA-19, 20COA-21, 20COA-22, 20COA-24, 20COA-25]
